# Supplementary material for: Sequential pembrolizumab cooperates with platinum/5FU to remodel the tumor microenvironment in advanced gastric cancer: a phase II chemoimmunotherapy trial
Source: medRxiv preprint, doi:10.1101/2023.04.03.23288062, version 1 (2023-04-03)
Supplement: Supplemental Table 2 [file 288062_file03.xlsx]

## Sheet: B_B
	pB1_B (unique)	pB2_B (shared, ISG/MHCII)	pB3_B (unique)	pB4_B (shared, plasma cell)	contaminant	pB6_B (unique)	pB7_B (shared, proliferation)	pB8_B (shared, NFkB)	pB9_B (shared)
0	EFS	HLA-DRA	ALAS2	XBP1	CD3D	CDO1	RRM2	FOSB	MYBL1
1	EPHA7	HLA-DPB1	HBM	PRDX4	CD8B	RMDN2-AS1	TYMS	JUN	AC023590.1
2	CDH11	HLA-DPA1	CA1	ERLEC1	CD8A	AC006449.5	MYBL2	H3F3B	MYO1E
3	KCNE4	HLA-DRB1	EPB42	GAS6	CD3E	AL133163.2	TUBA1B	TUBB4B	CDCA7
4	P2RX3	HLA-DQB1	RHAG	TMBIM6	CD3G	AC080038.1	NUSAP1	LMNA	CAMK1
5	C1QTNF2	MS4A1	AHSP	LMAN1	NKG7	AP000550.1	PKMYT1	IER2	TCL1A
6	COX4I2	CD74	SNCA	MZB1	IL32	ADAMTS8	MKI67	VIM	SERPINA9
7	RGS5	HLA-DRB5	HBD	RPN2	GZMA	AC091953.1	ZWINT	TIMP1	NEIL1
8	IGFBP7	HLA-DQA1	ARG1	SPCS3	CCL5	ADAMTS5	TUBB	PPP1R15A	LMO2
9	C1QTNF1	LAPTM5	HBB	FKBP11	GZMM	GHR	HMGB1	JUND	FGD6
10	WFDC1	CD37	SELENBP1	PECAM1	CD7	TIMP3	TK1	ZFP36	ACY3
11	CALD1	CD83	HBA1	TYMP	CD247	CCL11	CDK1	UBE2S	MARCKSL1
12	SOD3	BANK1	HBA2	DERL1	CST7	CCL2	CENPW	DUSP1	AFF2
13	ADGRA2	REL	TRIM58	CD38	TRAV1-2	NR2F1	HIST1H4C	PABPC4	DTX1
14	HIGD1B	CXCR4	HBQ1	SSR4	GZMH	CYP1B1	DHFR	CIRBP	LINC02832
15	GPX3	CD52	KLF1	ERGIC3	FYB1	MEG3	ASPM	NR4A1	SORL1
16	LRRC4B	LTB	SLC25A37	TXNDC15	DTHD1	THBS1	PPIA	CITED2	LPP
17	THY1	SPIB	TAL1	GSTP1	CD8B2	FGFR2	STMN1	NFKBIA	LINC02712
18	HRCT1	CD82	ACSL6	FCRL5	PRF1	ITGA11	SHCBP1	GADD45B	MME
19	CARMN	HLA-DMB	SLC6A19	TMED10	SH2D1A	ANGPTL4	MAD2L1	SPINK2	CD22
20	ECRG4	TRIM22	AC092490.1	TECR	SCUBE1	GALNT16	PCLAF	CDKN1A	SUGCT
21	SLIT3	LYN	MFSD2B	CADM1	SIRPG	ADGRL2	PHF19	JCHAIN	ELL3
22	EPHA3	SELL	IGLV2-5	AKR1A1	LCK	ARMH4	CDT1	SERTAD1	RGS13
23	RARB	HLA-DMA	SLC4A1	SMPDL3B	ZNF683	NEGR1	HIST1H3B	EIF1	SYNJ2-IT1
24	EDNRA	BTG1	RAP1GAP	NDUFB11	SH2D2A	CCN1	DUT	EGR1	AP002815.1
25	TWIST2	CCR7	SLC25A39	PSME2	TRBV6-2	AC002511.1	AURKB	RPL3	AC106900.1
26	NMUR1	FCMR	GMPR	TMEM258	CD2	KIAA1755	TMPO	RPL10	RAPGEF5
27	FRZB	NFKBID	PHOSPHO1	RABAC1	SLA2	HTRA3	HIST1H1B	TSC22D3	RFTN1
28	ADIRF	NAPSA	FAM210B	PHPT1	PDCD1	DNM1	HMGB2	JUNB	SLC16A2
29	AKR1E2	IRF8	BCAM	COX7A2	LINC02446	SRRM4	PCNA	KLF2	ST8SIA5
30	NFASC	LRRFIP1	KLC3	VKORC1	CTLA4	AL583808.1	FEN1	CSRNP1	BCAS4
31	POU3F2	IFI30	FAM83A	KDELR2	BCL11B	CXCL1	GTSE1	TNFRSF18	RMI2
32	LINC01082	RUBCNL	BCL2L1	SERF2	GZMB	TMTC1	SMC4	DDIT4	KANK2
33	LAMA4	LY86	GPR146	DERL3	ZAP70	NR2F1-AS1	GINS2	FOS	LINC01991
34	CD36	CD19	GLRX5	COPE	TMIGD2	FGF14	KNL1	SMDT1	AL645608.1
35	LRRC32	SLC2A3	MPP1	SEC11C	COTL1	RARRES2	KIFC1	RPL18	LHFPL2
36	ARHGAP29	SESN3	STRADB	IFNAR2	VCAM1	TRPA1	GAPDH	ACTG1	SERP2
37	EHD2	BCL2A1	DCAF12	ITM2C	IL9R	SDC3	CCNA2	SRGN	TBC1D4
38	CYGB	LCP1	GLUL	PIM2	CHN1	MEG8	DIAPH3	MCL1	LCP1
39	RERG	RILPL2	USP12-AS2	CYBA	MATK	APOD	CENPM	DDX5	BIK
40	LINC01091	SNX2	CAT	SSR3	SH3BGRL3	RTN1	GMNN	PDE4B	PARP1
41	LURAP1L	LDLRAD4	IGF2BP2	PRDX2	CRTAM	AL355612.1	CDCA3	EEF1A1	AC008750.7
42	CHST3	PTPRC	OSBP2	ARSA	GIMAP7	AL359764.1	FOXM1	HOMER3	AC092723.3
43	NDUFA4L2	SWAP70	ABCG2	SEL1L	AOAH	HOXD9	MCM7	ATF3	TBC1D22A-AS1
44	MYLK	PLAC8	AC004938.2	GRN	FYN	LINC02197	CENPA	EEF1D	GLRA2
45	C11orf96	RBM38	Z94057.1	ALG5	GZMK	OR8G1	HMGN2	H2AFX	FNDC1
46	GJA4	RASGRP2	BLVRB	UQCRQ	GPR171	LINC01239	UBE2T	EZR	AP001107.3
47	COL14A1	LIMD2	DENND5B-AS1	NDUFA11	TRGV9	MEIS3	CDCA5	RPLP1	GCHFR
48	ACVRL1	CXCR5	FECH	OSTC	JAML	SERPINA10	H2AFZ	UBB	BACH2
49	PDE9A	RHOG	R3HDM4	CHID1	CD244	PROX1-AS1	RANBP1	AHNAK	GALNT14
50	FABP4	PARP15	NFIX	SEC61A1	PPP2R2B	RGS7BP	NUF2	TPT1	AC092757.2
51	NEURL1B	IFITM2	GYPC	GLRX	ICOS	AC009271.1	CENPU	EIF4A3	LRMP
52	GUCY1A1	MAP4K4	YBX3	SPCS2	S100A4	RIMBP2	MCM3	ODC1	GDPD5
53	CAVIN1	CD72	NCOA4	SEC61G	TNFSF14	PRMT8	TOP2A	RPL14	CXCR5
54	PGF	RIPOR2	GABARAPL2	LY96	CPA5	FBLN1	RAN	EEF1B2	BMP7
55	FOXF2	TUBA1A	SLC40A1	PPIB	GNLY	ADAMTS1	C12orf75	RACK1	BCL11A
56	TAGLN	CR2	AL928970.1	NCLN	TRBV24-1	TCF21	TROAP	PNP	ZNF732
57	PCK1	PAX5	MYL4	TMEM208	ITK	EFEMP1	SLC25A5	SERP1	AL353597.1
58	MAP1B	PIK3AP1	BPGM	VOPP1	TRAT1	PDZRN3	PTTG1	FAU	AC007327.2
59	AC002070.1	SMIM14	MXI1	NDUFA4	THEMIS	RIMS2	UBE2C	UBE2J1	MEF2B
60	ITGA7	PIKFYVE	STMP1	SEC13	NCR1	AL390961.1	SPAG5	RPL13	CHD3
61	TBX2-AS1	CYBB	ADIPOR1	TMEM59	ZYX	PEX5L	HIST1H1E	DUSP5	HMGN1
62	DOCK1	ARHGAP24	BNIP3L	AC012236.1	LAT	MGAT4C	MND1	RPL36AL	OGG1
63	NID1	ARRDC2	MUC17	HM13	AUTS2	ZNF521	BUB1	CD79A	CD79B
64	TNS1	STAT6	SLC14A1	TXNDC11	TRBV4-2	PLOD2	ASF1B	RPL8	LINC00487
65	DLC1	TGIF1	PMEL	GUK1	KLRD1	CFH	H2AFV	RPS14	ECEL1
66	TBX2	VPREB3	FKBP8	PSAP	JAKMIP2-AS1	SYT7	MCM10	CYTOR	MAML3
67	BGN	HLA-DQA2	HK1	ATP5F1E	AC067750.1	PODN	SKA1	TGFB1	AL450998.3
68	TPM1-AS	CCR6	AL591926.2	MIF	AC005670.1	STMN2	SPC25	NACA	LINC01857
69	CRISPLD2	TMSB4X	DMTN	HSP90B1	CXCR1	POTEI	LMNB1	LIME1	MAP4K4
70	TMEM204	MTPN	MKRN1	SDF2L1	RADIL	MLXIPL	CEP55	PPDPF	DEK
71	PKDCC	SYNGR2	CDC34	SIL1	TRBC2	SPARCL1	CLSPN	NOP53	C14orf132
72	FRMD3	LYSMD2	CA2	HLA-C	CD96	TENT5B	ESCO2	DNAJB1	AC119673.2
73	NRIP2	PLD4	NINL	OST4	CXCR6	ZNF503	HMGB3	RPS5	AC009879.4
74	IGLL1	GRASP	MUC16	ATP5PF	HMGB2	GAD1	TPX2	KCNQ1OT1	BCL7A
75	KITLG	YWHAZ	TESC	B2M	PFN1	IGKV1OR2-118	CDC25A	SLC25A6	SWAP70
76	PDGFRB	CIITA	ANK1	CCND2	CD5	KCNIP3	ATAD2	UBC	LINC00877
77	PDGFA	FCER2	MAFG-DT	DAD1	TRAV5	LINC00491	NCAPH	COMMD3	DMXL2
78	CAVIN3	CD40	ZNF784	CALU	IL26	UNC80	POC1A	GNG7	SPI1
79	GPT	AFF3	BX255925.3	ATP6V0B	JAKMIP2	NOVA1	HIST1H3C	ZBTB38	POLD4
80	PRSS23	PLEKHG1	YTHDF3-AS1	BSCL2	PARD6G	MCOLN3	SNRPG	CDK2AP2	AL133523.1
81	KAZN	INPP5D	C9orf78	ELL2	TRAV19	NCKAP5	YBX1	SLAMF7	DNMT1
82	ADGRD1	LBH	MAP2K3	SELENOS	LCP2	TMEM95	CDC45	ANKRD28	NEUROG2
83	FILIP1	COTL1	NPL	SRM	CORO1A	EDIL3	FBXO5	BRD2	AC016168.2
84	CSRP2	B4GALT1	ZBED6CL	ICAM2	EOMES	STK32A	ENO1	RGCC	SLC25A27
85	LIPH	SNX9	CARNS1	FNDC3B	HIST1H2AI	ROR2	CDC6	TNFRSF17	PAG1
86	SNCG	SCIMP	LIPT2	PLD3	PRKCH	SH3PXD2B	FABP5	SMOC1	STAC3
87	NR2F2	PPP1R18	AC005540.1	PRDX1	TIGIT	KCNE5	DTL	TNFRSF4	SYBU
88	ACTA2	TRBC2	AL022318.1	P4HB	GRAP2	ADH1B	MCM4	PPP1R10	BPTF
89	HOXB-AS3	ARHGAP17	UGGT2	ELOB	XCL2	DNAH5	BIRC5	TXNDC5	GCNT2
90	CDHR3	WDFY4	ANKRD9	UQCR11	GIMAP5	ESYT3	RAD51	RPL5	FAM170B
91	LINC01550	TRAF4	EIF2AK1	HERPUD1	PSTPIP1	YEATS2-AS1	HASPIN	TAGLN2	WDR63
92	TANC1	MYH9	FBXO7	DANCR	FSD1	LINC01205	CENPK	RPS9	PIK3AP1
93	COL5A3	RASSF2	LGALS3	FUCA2	GIMAP4	DNAAF3	NCAPG	SNHG12	ALOX5AP
94	TMOD1	TGFBR2	ZNF280D	ALG3	ADAP1	AC018553.1	PTMA	AL133415.1	AL121757.2
95	TPM1	CD24	RGS10	LMAN2	METRNL	IGSF23	SLC43A3	EEF2	AC010680.1
96	CAMK2N1	TSPAN33	AC005037.1	NDUFB7	AMZ1	SCGN	TACC3	SPCS1	LINC01152
97	ADCY6	CYB561A3	TBC1D22B	RNASEK	INPP4B	ERFE	PFN1	AQP3	GGA2
98	MYL9	LAT2	RBM38	PLPP5	RGL4	LINC01580	CFL1	RPL24	AC135782.2
99	GULP1	CD22	RNF10	SEL1L3	UBE2C	RASSF10-DT	ATP5MC3	KRTCAP2	LGALS8-AS1

## Sheet: B_F1
	contaminant	pB2_FU1 (shared)	pB3_FU1 (shared)	pB4_FU1 (unique)	pB5_FU1 (unique)	pB6_FU1 (unique)	pB7_FU1 (unique)	pB8_FU1 (shared, ISG/MHCII)	pB9_FU1 (shared, plasma cell)	pB10_FU1 (FU2, histones)	pB11_FU1 (shated, proliferation)	pB12_FU1 (shared, NFkB)	pB13_FU1 (shared)	contaminant	contaminant
0	CD2	JCHAIN	RRM2	OTOF	TPSAB1	SLC25A48	LTF	HLA-DPA1	GAS6	HIST1H3B	PLK1	IER3	RGS13	SLC16A8	GZMH
1	ICOS	VIM	TYMS	C6orf223	TPSB2	AC026310.2	FDCSP	HLA-DRA	XBP1	HIST1H2BB	CENPA	SNAI1	AC023590.1	TRGV9	TRBV5-4
2	CD3E	TMEM59	CDC6	S100A9	CPA3	AC008738.5	CLU	HLA-DRB1	IGHG1	AC079841.2	CDC20	FOS	MYBL1	TRDV2	TRAV19
3	TRBV5-6	SSR4	PKMYT1	FCN1	ZNF462	ZNF503-AS1	FCAMR	HLA-DQA1	CADM1	HIST1H3D	CCNB2	EGR1	SERPINA9	KIR3DL3	PRF1
4	TRAV3	SRGN	ZWINT	FCER1G	MAGI2-AS3	BTNL3	PTGDS	CD74	PTP4A3	HIST1H2BH	KIF23	RASD1	LPP	KLRC2	NKG7
5	CD3G	SPCS1	MYBL2	DYSF	SPATA12	LIF	CSTA	GBP4	PECAM1	HIST2H2BF	CENPF	GADD45B	MARCKSL1	TMIGD2	TNIP3
6	IGHVIV-44-1	KRTCAP2	FEN1	CLEC12A	POU6F2	LINC02747	GGT5	HLA-DPB1	IGKC	HIST1H2BL	KIF20A	IER2	BIK	AC084048.1	CD8B
7	CXCR6	UBC	RANBP1	CD300E	KIT	HOXA13	RARRES2	HLA-DQB1	CCND2	HIST1H1E	AC112254.1	JUN	FHOD3	NCR1	ITGA1
8	CD3D	DNAJB9	CDC25A	PMP22	GATA2	PHGR1	C16orf89	CD83	IFI6	HIST1H3I	ASPM	ID2	CDCA7	XCL2	GZMM
9	LAYN	SERP1	GAPDH	SIGLEC1	AC092171.3	GLDN	SEMA5A	MS4A1	SMPDL3B	HIST1H2AB	HMMR	DUSP1	RAPGEF5	TRBC1	GZMK
10	SIRPG	HSPA1B	DTL	SLC24A4	TPSD1	KRT19	SPOCK1	TMSB4X	ERLEC1	HIST1H2BE	AC040168.1	SNHG12	AFF2	CD7	CCL5
11	CPA5	SELENOK	CDC45	CEBPA-DT	EVPL	C6orf141	AC007750.1	GBP1	SERPINI1	HIST1H1B	CENPE	UBB	CAMK1	KLRC4	LINC02446
12	TIGIT	EIF1	PPIA	RNASE2	SLC18A2	CKMT1B	AC073987.1	CD82	GLRX	HIST1H2BM	TPX2	NFKBIA	FGD6	BVES-AS1	CD8A
13	TRAV21	LMNA	TUBA1B	S100A12	MAOB	AP003555.2	TSPAN11	EBI3	PRDX4	HIST1H2BF	UBE2C	DNAJB1	ELL3	KLRD1	FASLG
14	CTLA4	DUSP5	TMEM106C	LGALS2	DLC1	MS4A8	OSMR-AS1	IFITM2	SEL1L	HIST1H2BJ	CCNB1	NRARP	SSBP2	CD247	TRBV11-2
15	HACD1	SEC11C	DIAPH3	FOLR3	GATA1	SULT1C3	CAPN6	GBP2	VSIR	HIST1H1C	DLGAP5	HBEGF	MND1	TRDC	INTS6L-AS1
16	FOXP3	TNFRSF17	CDT1	MS4A6A	VWA5B1	KRT8	KEL	BANK1	TOR3A	LINC01559	CTNNA3	CITED2	MME	KLRC3	FYB1
17	IL32	ARF4	LDHA	PLXDC2	ZNF521	AL109920.1	MATN2	REL	PIM2	GRIN2C	NEK2	FOSB	UCHL1	TRGC1	ANXA1
18	LRRN3	SEC61B	ENO1	SDS	MS4A2	LINC00698	SERPINA3	COTL1	CAV1	HIST1H4D	TOP2A	HSPB1	LRMP	LAYN	CD3D
19	TRBV6-1	CD63	CLSPN	AIF1	KREMEN1	C19orf33	LPAR1	CD40	ELL2	HIST1H2BC	ARHGAP11A	JUNB	MEF2B	PLXDC1	AL391560.1
20	CD7	ZFP36	PCNA	CLEC7A	AC005998.1	IGKV1D-17	LINC01170	IFIT3	DERL1	AL359397.1	CDCA8	PLK2	PRKAR2B	CD3E	Z97198.1
21	LINC00885	MANF	TPI1	TGFBI	ZNF704	CAPN8	AARD	CD52	PRDM1	HIST1H2AC	TROAP	PARD6G-AS1	GCHFR	KLRB1	LDB3
22	IGLV8OR8-1	PABPC4	MCM7	SERPINA1	CATSPER1	MMP28	ARNT2	LAPTM5	RPN2	AL122058.1	DEPDC1	HSPA1L	TUBB2B	KIR2DL4	PARD6G
23	TRAV8-3	MCL1	GMNN	S100A8	HPGDS	ABCC3	CXCL14	CAPG	FKBP11	HIST1H4C	PIMREG	POU3F1	NRGN	SLA2	CST7
24	MAF	B2M	DUT	LILRB2	UNC5B	TFF1	CYP1B1	BCL2A1	PLD3	HIST1H1A	DEPDC1-AS1	UBE2S	LHFPL6	CCL5	BCL11B
25	SH2D1A	TIMP1	CENPM	RETN	RAB27B	PDZD3	TREML1	TRIM22	FNDC3B	RNF180	KPNA2	PPP1R15A	DEK	GZMA	GZMA
26	GIMAP5	TXNDC5	PCLAF	IGSF6	TNS1	MLPH	OR2I1P	IFI30	FAM92B	AC132153.1	PSRC1	NFKBIZ	PSIP1	IL2RB	C21orf91-OT1
27	ANKS1B	RPL10	CENPW	CD36	AC091563.1	LINC01843	PDE8B	CD86	LTC4S	HIST1H1D	PTTG1	INTS6	NCKAP5	MAPT	AL732292.2
28	ITK	SPCS2	TK1	AC108673.2	APOE	REG4	ABLIM3	RAC2	CYTIP	HIST2H2AB	SHROOM2	GADD45G	ACY3	AHRR	SH2D1A
29	KLRB1	HSPA1A	MCM10	FRMD4B	C3AR1	HEPH	C1QTNF1	IFIT2	CLPTM1L	ANKRD30BL	AC087683.2	AC245014.3	STAG3	AC008736.1	VCAM1
30	CD28	DERL3	DHFR	CD300LB	BST1	TBX3	LINC01556	NAPSA	EIF2AK3	PRR15	HJURP	HIST1H2BG	TUBB3	SIRPG	NEBL
31	TRAV16	TRAM1	ASF1B	SLC22A18AS	AC097534.1	SPEGNB	COLEC12	SYNGR2	CCDC88A	HIST1H2AE	KIF14	KCNQ1OT1	TCL1A	TSPAN15	EOMES
32	UBASH3A	RPN1	SLC43A3	SIGLEC12	APOC1	TMPRSS15	WLS	PARP14	LMAN1	NDN	MB	AL627171.2	BAIAP2L1	PRKCH	ITK
33	LINC01119	CYBA	GINS2	IFITM3	AC010536.1	AC011287.1	DPYSL3	RAB31	AC012236.1	ESPL1	TWIST1	CRISPLD2	BCL7A	ITGA1	AC130371.2
34	LINC02539	JUND	LDHB	LINC00868	AC004921.1	MOGAT3	TMEM119	RHOG	TAPBPL	HIST1H2AL	CDCA3	SERTAD1	SCARB1	TNFRSF9	AC243585.2
35	TNFRSF25	TSC22D3	ALYREF	CPVL	AC092171.4	TM4SF20	IGFBP7	IFI44L	AKR1A1	AC022778.1	CDKN3	DLL4	C3orf67	FSD1	PRRX1
36	CD4	EZR	ATP5MC3	PLEKHS1	AC025048.1	CDC42EP5	AL135910.1	MYL12A	TECR	GFRA3	BUB1	PRODH2	CPM	MYO7A	AL670729.1
37	S100A4	HERPUD1	PGAM1	CTSL	LINC02829	GAS2L2	CALD1	ARPC1B	TXNDC15	AL450263.1	INCENP	AL390760.1	MYO1E	IL32	TERT
38	GIMAP7	TNFRSF18	RAN	GMPR	AC100830.2	MUC3A	NPB	CMTM6	TXNDC11	AC011472.4	CCNA2	MATN3	SYNE2	PERP	KLRD1
39	CD247	SELENOS	CHCHD2	IGF2BP2	NIBAN2	ERN2	GNG12	TAP1	SPCS3	LINC01991	GTSE1	INHBC	MAP2	AC005261.2	AC002401.1
40	TRBC1	SELENOM	PTMA	UPK3A	LRMDA	PLA2G10	ITGA9-AS1	PIKFYVE	SEC24A	HIST1H2BI	NEURL1B	HCAR1	RGS9	UBASH3A	SH2D2A
41	CCR4	RPL36AL	MCM3	IL1B	PROS1	KIF12	SUSD4	LCP1	MBTPS1	RRM2B	NUF2	IER5L	CCND3	NKG7	TRGV10
42	TRBV24-1	LMAN2	TUBG1	IRX5	AC018695.9	TFF3	AP000547.3	LTB	P4HB	ARTN	TTK	HSPA2	C17orf99	AL135818.1	CD7
43	CST7	CUTA	H2AFZ	CST3	PROCR	HYAL1	TMEM150C	HLA-DRB5	SEC61A1	SUSD3	CEP55	ADRB2	HMGN2	HENMT1	AP005136.4
44	TRAT1	DDIT4	RRM1	CFD	CSE1L-AS1	MUC5AC	PCSK5	MYH9	GRN	HIST1H3F	Z84484.1	RMRP	DNMT1	AL137060.3	CALHM3
45	CAVIN3	DNAJC3	CDCA5	IGLC1	FAM182B	ADGRG6	CCDC149	ARL6IP5	CASP10	PSRC1	ARL6IP1	H2AFX	TBC1D4	AL391095.1	IL32
46	CD40LG	CDK2AP2	NPM1	AL391988.1	SHE	AC010198.1	FEZ1	CD19	TMBIM6	HIST1H4F	SYT17	THBD	POLD4	ITK	CD5
47	IL1R1	TPT1	TUBB	AC087588.3	HECW2-AS1	NPAS2	CDC42EP4	ITGAX	FUCA2	SUGCT	AURKA	AL451085.1	NEIL1	GPAT3	FAM182B
48	ZAP70	NPC2	YBX1	SHTN1	AL157895.1	FAM110C	TRIM9	VASP	ERGIC3	HIST2H2AC	NMU	AC253572.2	SPRED2	JAML	GIMAP7
49	GZMM	PDIA6	GGH	AOAH	AC112206.2	GATA4	AC008764.3	IFIT1	ST6GAL1	KNL1	KIF11	IER5	AC026904.1	ACOT4	AC012603.1
50	LAT	TMEM258	NDUFV2	AATBC	AL353803.4	AL390719.2	PRELP	SH3BGRL3	SSR3	AL591845.1	TUBA1C	HEXIM1	FNDC1	TNFRSF1A	CPNE7
51	GPR27	SSR3	RFC4	ARRDC4	AC093627.22	EPN3	SMAD9	NFKBID	KCNN3	IQCD	MKI67	ZFAND2A	SYTL2	BCL11B	RGS18
52	BATF	HM13	FBXO5	LILRA5	AMHR2	C6orf132	UHRF1	PTPRC	MZB1	DTX1	CDK1	RND1	METAP2	LINC00894	GIMAP1
53	GORAB-AS1	UBE2J1	SLC25A5	TYROBP	LPCAT2	CHST5	SERPINF1	CCR7	PSAP	HIST1H3C	KIF4A	AL021155.5	UCP2	KLRK1	AL683807.1
54	LAIR2	SLC3A2	MELK	AC093425.1	IQSEC3	CEACAM6	RAI2	CD37	CD38	LINC00472	CIT	AC020911.2	LCP1	SH2D1B	AC009704.2
55	IGKV1-27	FTL	HMGA1	AP000919.2	RAB32	RNF152	FBN2	RUNX3	PIK3CG	CCDC171	AURKB	DUSP2	LINC01857	REXO5	LILRB4
56	PRKCH	PSAP	MAD2L1	MYO10	DNAH12	MTRNR2L12	SERTAD4-AS1	LYN	KDELR1	SMAD9	CFAP299	DNAJB4	HMGB2	ID2	CD3E
57	SH2D2A	SSR2	C1QBP	NUTM2D	ZNF114	SYT8	MAOB	SP110	CALU	PGBD5	RACGAP1	AL355075.4	STMN1	SCCPDH	AC131159.2
58	OTP	OST4	SKA3	AC005280.2	AC024940.1	MTMR11	MIR3659HG	RASSF2	SDC1	HIST1H2BO	NCAPG	CSKMT	PCLAF	POPDC2	LDLR
59	TRAV8-2	SLAMF7	RPA3	AL138762.1	NT5C1B	AC083855.2	IGFBP5	EPSTI1	PRDX2	AICDA	DEPDC1B	CALCRL	HMGN1	DFFB	AC008655.2
60	TMEM173	NUCB2	SPC25	CFP	DOCK3	EFNA2	S100A1	TPM3	TPST2	AL672310.1	CDCA2	BTG2	GLUL	CXCR6	AL451067.1
61	GIMAP6	PDIA4	SMC2	FPR1	ST8SIA6	MIR194-2HG	RHBDL3	GPSM3	LILRB4	TCL1A	ANLN	FN1	DTX1	PEX11G	CD3G
62	FYB1	PLPP5	FABP5	MNT	TIMP3	CCL15	TMEM176A	ZNF267	ALG5	AC018781.1	SGO2	SGK1	GMDS	TYMS	KLRC4
63	TRAV17	RPLP1	FOXM1	ICAM5	VWA5A	AC078802.1	KLF1	PPP1R16B	LAP3	RTKN2	PRC1	MAFA	FAM76B	MUC4	SCUBE1
64	ARRB1	PDE4B	ACOT7	AC090559.2	TMEM221	RNF128	C1S	HAPLN3	CYBA	AC007952.5	SPAG5	PEG3	FAM111B	AC007349.2	AL355490.2
65	TRBV28	ITM2C	RPS17	TMEM176A	AL138824.1	PLEKHG6	CKB	FLNA	COPE	HIST1H2AJ	FAM72B	ARL4D	LCK	TM6SF1	AC006064.4
66	RTKN2	EEF1D	SHCBP1	IL1R1	AC093577.1	HSD17B2	AL157402.1	PTPN6	RABAC1	KCTD3	CKAP2L	AL499604.1	SWAP70	ESPL1	AL442125.2
67	TRBV7-2	SDF2L1	HMGB1	IFI27	AC079340.2	MARVELD3	IGFBP3	PLEKHO1	TMEM238	HIST1H3G	KNSTRN	NXF1	HES6	WSB2	AC007250.1
68	AC136604.2	GLA	EIF4A1	AL589935.1	AL390957.1	TFPI	FSTL1	ACP5	CPEB4	E2F2	BIRC5	TUBB4B	PRDX6	COTL1	SAMD3
69	EDARADD	PDIA3	ATAD2	MMP14	NDRG2	AC010319.3	AC090912.2	SPIB	CHID1	PAGE5	GPSM2	AC011446.2	RAPH1	BIRC5	AOAH
70	PHLDA3	CRELD2	MCM4	ETS2	ARRB1	AC092902.6	VTN	TRAF4	IL10RA	AC073529.1	POC1A	AC020916.1	DCAF12	ABCA3	AP001885.2
71	GSEC	TMED10	UHRF1	CDC42EP2	PDLIM4	FLVCR2	SHTN1	CCL22	BHLHA15	BMP7	AC090236.2	TNF	BACH2	SARDH	PRKCQ-AS1
72	LCK	RABAC1	MCM5	C5AR1	FBXW7	BCAR1	DBNDD1	PARP15	MTDH	AC130324.2	ALOX15	SLC17A4	TK1	SCD5	PRR33
73	GRAMD1B	SEC61G	H2AFV	DOCK5	IL1RL1	ACOT11	NPTX2	YWHAZ	TENT5C	KIFC1	ADAM23	MYCL	DCK	ACOT7	AC091132.4
74	TMEM204	CYTOR	SIVA1	BRI3	AL355499.1	ATP2C2	SPARC	SP100	MGAT1	AP000251.1	KIF20B	CCM2L	HMGB1	LAPTM4B	TRAT1
75	TRBV19	PRDX4	LRR1	TLR4	PSTPIP2	AC008397.1	PADI2	LITAF	HDLBP	RIMKLB	LINC01013	OR2B2	CAMK2B	POU5F2	AC068898.1
76	GATA3	FKBP11	CYC1	KIAA1211L	SPDYE1	FAM83F	AC079793.1	HLA-DMA	PSME2	CCDC74A	PBK	CDKN1C	CENPU	NDC80	RCAN3AS
77	CD6	MEI1	TFDP1	PILRA	UPK3BL1	AKR1C3	ITGA2	GBP5	HM13	KANK2	CKS1B	RNF165	PRPSAP2	TMEM237	LINC01871
78	GIMAP4	TMEM205	PHF19	FOXP1-IT1	NECTIN3	LGALS4	CCN1	PLSCR1	ARSA	AC009118.2	NCAPD2	ATF3	MOB1B	TRGV3	TSPAN15
79	FDXR	RPL3	ESCO2	AC090559.1	BCL2L14	IGSF9	UPK3A	SEMA7A	MRPS24	MKI67	KIFC1	AL139246.5	LIMD2	CTLA4	HMGB3
80	FOXB1	TENT5C	SSRP1	PAPLN	ARHGEF40	ANKFN1	CXCL13	ACTB	IFI35	FOXM1	AL009031.1	AC114977.2	LTBP1	TNFSF14	COL4A6
81	LINC01229	CHPF	E2F8	CD276	PPM1H	GLYCTK-AS1	ANO5	DTX3L	ZNF706	ERI2	ARHGEF39	GDF15	AICDA	NINL	BFSP1
82	NRIP3	ERGIC3	PKM	MAFB	AC006483.2	S100P	AC105935.1	SELL	FCRL5	HIST1H2AM	AICDA	HIST2H2AA4	PARP1	TRGV7	DYNC2H1
83	PRAC1	HSP90B1	SNRPG	TNFSF14	TGFB3	CLDN7	SPNS3	FCRL4	DHRS9	ZNF385B	AL357992.1	MYLIP	AC119673.2	PRC1	CEP112
84	GNA15	SRPRB	NCAPH	MGST1	AC025048.7	AKR7A3	COL6A1	CD80	ALG3	ASRGL1	KIF2C	ABTB2	ST8SIA5	AC020910.5	JARID2-AS1
85	STC1	CALR	PAICS	CD14	AL662884.3	ESRP1	RYR1	LRRFIP1	MAGED1	AC003092.1	CKAP5	RDH10	CCNG2	LRRN3	GATA3
86	AC006452.1	MGST3	SNRPB	LONRF3	SMAD5-AS1	TACC2	RAD51	IFITM1	CHST2	TYMSOS	HMGB3	BAG3	SERP2	TRBV6-1	CD160
87	AC079171.1	TRIB1	PSMB3	ZFHX3	IGFALS	GCNT3	TDRP	BATF	SRM	HIST1H3J	CCNF	AF213884.3	H2AFY	SSBP4	PRKCH
88	GIMAP1	KDELR1	PSME2	LINC00235	HOXA10-AS	MALL	AKAP5	PEA15	TMED10	EME1	FGFR1	ATP1B2	BRI3BP	PRF1	AC018754.1
89	INPP4B	COMMD3	EXO1	CD302	AC005041.5	LHFPL3-AS2	C11orf74	CD53	IRF7	HMGB2	ECT2	AC092803.1	LINC01887	AC026979.2	AL356056.1
90	FBLN7	HLA-C	CHAF1A	PPIF	KLHL6-AS1	EPB41L4B	TOM1L1	MSN	CSRP1	PALLD	JPT1	KLF2	ZYX	ABI3	GIMAP4
91	THEMIS	SPAG4	CENPU	OVOL3	GNAQ	TSPAN1	ARHGAP10	TSPAN33	DANCR	TRIM2	TICRR	VASN	LINC01501	ST3GAL4	JAML
92	FRMD4B	ICAM2	HELLS	CASS4	CACNA2D2	B3GALT5	CCL21	CHD1	TMED2	TACC3	CKS2	ZC3H12A	BRIP1	EFCAB8	AL355353.1
93	AC017002.3	HSP90AA1	COX8A	LYZ	SOCS6	CDHR5	BAIAP2L1	PSMB9	MSL3	HIST1H3H	ORC6	GEM	SUGCT	GRAP2	F2R
94	AL139011.1	SLC25A6	NUDT1	NLRP3	AMOTL1	FGFR3	MCM4	MYL12B	WIPI1	ADAM23	DANT2	AC007384.1	MTA3	APOC2	GYG1
95	GPR68	RPLP0	PA2G4	AC013403.2	ERMN	MUC1	NDN	EVL	KDELR2	AP001059.2	AC022726.1	RSRP1	AP001107.5	HIST3H2BB	FRMD4B
96	DUSP16	DPP7	UQCRH	SEC14L2	AC090912.1	NR2F2	UNG	MTPN	TYMP	SYNE2	SNCG	HIST1H2AE	FHL2	KIF5C	AC115618.1
97	ZAN	ARMCX3	TCF19	IFITM2	Z84485.1	ANO7	TBILA	MOB1A	MBNL2	AC026191.1	GNAO1	DNAJA4	DUT	POLE	PTCH2
98	AC012464.2	RGCC	SUB1	CEBPD	AC012291.3	NOXO1	VWA1	TMSB10	DNAAF1	POT1-AS1	REEP4	ADM	DHFR	IGLV8OR8-1	AC103703.1
99	HNRNPLL	DNAJC1	PSMB2	SOD2	SIGLEC6	PLEK2	RAB13	RFTN1	VOPP1	TCL6	PRR11	HIST3H2A	BCAT1	DAPK2	IDH2

## Sheet: B_F2
	pB1_FU2 (shared, plasma cell)	pB2_FU2 (shared)	pB3_FU2 (shared, ISG/MHCII)	pB4_FU2 (unique)	pB5_FU2 (shared, HSP)	contaminant	pB7_FU2 (unique)	pB8_FU2 (unique, activated)	contaminant	pB10_FU2 (shared, proliferation)	contaminant	pB12_FU2 (shared, JUN/FOS)	pB13_FU2 (unique)	pB14_FU2 (shared)	contaminant	contaminant	pB17_FU2 (unique)	pB18_FU2 (shared, NFkB)	pB19_FU2 (FU1, histones)	pB20_FU2 (unique)	pB21_FU2 (shared, on-tx)	pB22_FU2 (shared, plasma cells)	pB23_FU2 (shared)	pB24_FU2 (shared, ISG/MHCII)
0	IGHG1	ASF1B	GBP1	THBD	HSPA1B	CYBRD1	PPM1E	NFKBID	AC013565.3	PLK1	CTLA4	FOS	AL121809.1	AC023590.1	PRG4	CYBA	AC016027.3	EZR	HIST1H2AI	AL445309.1	ATP5MC3	CCR10	HYOU1	CD37
1	MT1X	UHRF1	GBP4	AL591115.1	HSP90AA1	AL023584.1	AFAP1L1	CD83	LINC01730	CFAP299	LAIR2	IER3	PLA2R1	AFF2	LINC01618	SELENOM	GJD4	LMNA	HIST1H2BF	GPT	EIF4A1	DUSP5	PDIA4	RPS27
2	MT2A	CLSPN	FCRL4	AC114977.1	DNAJB1	AL133395.1	DACT3	NR4A3	TRAV25	LINC02071	TNFRSF4	EGR1	CERNA3	NEIL1	AC104435.2	KRTCAP2	HIST1H1T	JUND	HIST1H1B	LINC02575	LDHA	HPGD	PSAT1	HLA-DRA
3	GAS6	PCLAF	GBP5	INHBC	HSPA1A	NPTX1	LRP3	BCL2A1	FGFBP2	AL354993.1	IL1RL1	IER2	IGHV7-81	SERPINA9	AL157937.1	DERL3	LINC00870	PDE4B	HIST1H2AL	AC117395.1	C1QBP	LINC02362	HSP90B1	S1PR1
4	LILRB4	PCNA	TMSB4X	AC009646.2	HSPE1	HPR	SRRM3	EGR3	AC008964.1	CDC20	CD177	DUSP1	IGHE	MARCKSL1	AC079329.1	SSR4	AL354916.1	SQSTM1	HIST1H3J	PDE10A	ATP5MC1	TNFRSF17	HSPA5	CXCR4
5	PTP4A3	GINS2	COTL1	IL7R	HSPH1	AC079753.2	HNF1B	MYC	ST8SIA6	AURKA	ICOS	JUN	AL391834.1	HMGN1	AC106820.5	CD63	CACNA1B	VIM	HIST1H3D	PDZD3	PPIA	JCHAIN	CALR	HLA-DPB1
6	MT1E	TK1	PARP9	CALCRL	HSPA6	CHST3	SPTBN4	KDM6B	CCL5	CENPF	CXCR6	GADD45B	AC068228.3	OGG1	RBPJL	JSRP1	HIST1H2AJ	GADD45A	HIST1H3B	TRIM29	CD320	TXNDC11	PDIA3	BANK1
7	CADM1	DUT	ITGAX	AL360012.1	HSPD1	MID1IP1-AS1	NAT8L	REL	KLRD1	CCNB1	HLF	SNHG12	LIN7A	SUGCT	TRBV6-5	TMEM59	HIST1H2BH	CSRNP1	AC107032.3	AL359851.1	GGH	UAP1	MANF	FCMR
8	CCDC88A	DNMT1	GBP2	LINC00589	BAG3	THBS1	NCS1	TNF	PRF1	CCNB2	LAYN	UBE2S	AP002336.3	PTPRCAP	TRAV26-1	NENF	FADS2	AQP3	MYLK2	SGMS2	CYC1	TXNDC5	SEC24D	HLA-DPA1
9	CHST2	MCM4	IFITM1	AC026124.1	HSP90AB1	TRAV27	FABP3	TNFSF9	CD8A	CDCA8	FRMD4B	UBB	AL137077.2	HTR3A	CD2	SPAG4	ASB13	CYTOR	APOBEC4	GDF15	NME1	PRDM1	ALDH1L2	RPL39
10	IFI6	MCM7	AC100791.3	AC253572.2	DNAJA1	XCL1	CTSD	EGR2	NKG7	KIFC1	TRAV1-1	FOSB	CCND2	RFTN1	LAT	NPC2	IQGAP3	KLF6	HIST1H2AH	CLDN4	RPS17	EHMT1	AARS	LYL1
11	NEAT1	RAD51	FOXS1	MSRB3	HSPB1	KLRC1	C1S	NR4A2	CST7	TPX2	TTBK1	SNAI1	DIP2A-IT1	LMO2	LINC01281	PRDX4	HIST1H4D	TRPV3	HIST1H4F	SFN	PSME2	PRR7	EDEM1	VPREB3
12	CPEB4	HELLS	CA3	MEFV	ZFAND2A	NBL1	IGSF3	RILPL2	GZMH	CKAP2L	DGCR9	CITED2	AC005962.2	SMIM14	CD247	CERCAM	KATNAL2	CD55	HIST1H2AE	SULT1E1	CHCHD2	IGHA2	HERPUD1	FCER2
13	IGHG4	TYMS	AL355297.2	AC013460.1	NR4A1	XCL2	AC112721.2	DUSP2	GZMK	KIF23	IL1R1	SERTAD1	C17orf78	AICDA	IL32	LY96	CIDEC	ZNF165	NTN1	SMOC2	CYCS	GLCCI1	DNAJC3	HLA-DRB5
14	LTC4S	DEK	AC107464.1	NFAM1	HSPA8	TRBV6-2	LINC01918	NFKB1	VCAM1	SGO2	F5	PPP1R15A	AC011603.2	SLC1A1	FAM72C	VKORC1	SLC13A4	PLAUR	AC009113.2	ANKRD22	MIF	CD38	GMPPB	RPS29
15	MT1G	FEN1	REV3L-IT1	CMTM2	UBC	NME8	Z98257.1	NFATC1	GPR171	CEP55	AC025162.1	NFKBIA	AC092162.2	HLA-DMA	AC073263.1	CUTA	AC023593.1	MIR155HG	AC008569.1	AC009802.1	SRM	ELL2	MEI1	RPL34
16	PECAM1	CENPM	AC024145.1	IL1B	DNAJB4	ETV1	DIRAS2	TRAF4	SLC27A2	GTSE1	AL359220.1	RASD1	OR52I1	IRF8	CHRNA6	ARSA	MAG	AL133415.1	TEX38	AC022762.2	MYDGF	BCL2L11	GOLGB1	RPS21
17	CCND2	DSCC1	TESC	AC245014.3	SPINK2	GZMB	AC117503.5	EBI3	GZMB	DLGAP5	PKD1L1	JUNB	CU633967.1	ELL3	LDHC	TMBIM6	AC097534.1	MIR22HG	HIST1H1D	TBX3	RPL35	AC004130.2	DNAJB11	ARRDC2
18	XBP1	BRCA1	GDI2	PTGS2	IER5	PHEX	CILP2	CCR7	TRAT1	KNSTRN	TCTEX1D4	NRARP	C3orf20	LAPTM5	AC079384.2	TMEM205	AC006111.2	ARID5B	IGKV1OR2-108	DNM3OS	SUB1	GLDC	WARS	RPL30
19	ERLEC1	MCM5	XAF1	AC239799.2	CACYBP	AC021660.4	AC017002.6	DDX21	ANKS1B	TROAP	TRAV8-3	THSD7A	AC010331.1	BCL7A	AC108676.1	SDC1	HIST1H4L	ZNF331	HIST1H2AG	TIMP3	PRELID1	F12	GORASP2	LFNG
20	ADM	FAM111B	CCR1	B3GNT5	FKBP4	CORIN	UBTD1	AL445223.1	TRBV19	NEK2	CD7	AC007389.5	CCDC150	CD79B	FAM71D	SIL1	AC090948.4	TNFRSF12A	HIST2H2BF	REG1A	PSMB6	BTG2	MTHFD2	CD74
21	CALU	CDC45	SP110	TAFA2	ANKRD37	MRC2	IFITM10	AL358334.2	GZMA	KIF20A	GATA3	SPAG17	AL121992.1	GPR18	H2AFY2	TECR	FHL2	FOSL1	HIST1H4C	ELF3	MDH2	SRGN	STT3A	LTB
22	AC099541.1	RRM1	SP140	PLCB1	SERPINH1	CRTAM	IL1RN	ICAM1	FRMPD3	CDCA3	NTRK1	RGS1	DIAPH3	DTX1	CD4	ERGIC3	HIST1H2AG	MCL1	HIST1H1E	CHRNA7	NDUFV2	PIM2	RPN1	MS4A1
23	MX1	CCNE2	STAT1	S100A9	HSPA1L	AP005482.1	NTRK1	CD69	HAVCR2	CENPE	CAMKV	EIF4A3	AC000065.2	LIMD2	SIRPG	TXNDC15	HIST1H2BM	ANXA2	HIST1H2AK	AC020907.1	PPIB	EAF2	MBNL2	TUBA1A
24	AC019186.1	MCM6	PTPN1	S100A12	BGLAP	VCAM1	ASCL1	NR4A1	GAPLINC	FAM72B	PTGFRN	TUBB4B	AC092119.3	DBNDD1	LINC01550	TMEM238	MYO10	MAP2K3	NUSAP1	TRIM15	TXN	CD59	VCP	SMAD7
25	P2RY6	ATAD2	CAPZB	S100A8	GPR15	CALCA	PLXND1	SEMA7A	TRGC2	ASPM	AL162427.1	KCNQ1OT1	SOX2	CD52	FOXP3	FKBP11	AL157813.1	DDIT4	LINC02832	TMEM171	RPS2	MAPKAPK2	NT5DC2	RBM38
26	MAN1A1	CDCA7	IFI30	CXCL8	AHSA1	AC122688.2	SOX4	HIVEP3	AL031432.3	UBE2C	FOXP3	DNAJB1	AC104984.3	AC104170.1	SH2D2A	FTL	RAPGEF5	TRIB1	HIST2H2AB	GPRC5A	ENO1	IL2RG	CKAP4	RPS23
27	MALAT1	STMN1	FGR	YPEL4	TIMP1	BICDL1	KLK14	RASGEF1B	GZMM	TOP2A	TRDV1	PLK2	FOXM1	CD22	CD3D	FKBP2	AC114947.2	RGCC	AL138831.2	TM4SF20	PSMB3	GSTM2	SERP1	SELL
28	USP18	E2F8	ARPC1B	STEAP4	DNAJB6	AL022322.2	PLA2G7	SDCBP	CD8B	BIRC5	TRAV13-1	ID2	EHMT2-AS1	MS4A1	AFAP1	ATRAID	TICRR	TAGLN2	OR5B21	PIK3C2G	NHP2	IFNAR2	CCPG1	LY86
29	DNAAF1	CENPU	SAMD9L	SPEF2	SMOC1	AL591846.2	PDCD1	NFE2L2	ANXA1	CDKN3	TRBV27	DLL4	E2F8	CD74	AL683807.1	AC012236.1	AC231533.1	UBC	ERC2	KRT19	NME2	XBP1	CRELD2	RASGRP2
30	AC007952.4	MCM2	RNF213	AC004528.2	BCAS2	GAS2L1	FAM83D	LDLRAD4	CD6	CDCA2	CCR8	AC011446.2	AL109806.2	LRMP	HES4	BSCL2	AC008443.2	YPEL5	HIST1H3C	OXER1	COX6B1	ITM2C	SLC3A2	RUBCNL
31	PRDX4	SLBP	JAK3	TMEM255B	AC025259.3	SCAT2	FBN1	PIM3	MCF2L2	DEPDC1B	RTKN2	KLF2	NLRP11	CD86	AC093677.2	PECAM1	PLS3	BCAR3	LINC01887	PCSK5	UQCRH	SPCS3	SYVN1	RGS19
32	PRDM1	TMEM235	PTPN6	TEX14	KIAA1217	ZNF695	CXCL13	MARCKS	PPP2R2B	LHFPL6	GNA15	H2AFX	MARC1	FAM170B	AC084026.2	ITM2C	LRMP	SERPINB9	AC025918.1	HSD11B2	PHB	QPCT	DNAJB9	NIBAN3
33	CSRP1	MAB21L1	HCK	GNAQ	RGS2	HIST1H3G	PRRX2	ZC3H12A	PRKCQ	HMMR	SYNE4	AC022306.2	HIST1H3C	KCNK12	AL121899.1	DPP7	TCL1A	CDKN1A	HIST1H1C	RIPK4	BOLA3	MZB1	HM13	RPL32
34	IFITM1	GCHFR	ZEB2	FFAR2	DEDD2	FAM166B	GPR153	RARA	CD3G	TTK	LRRC32	AC109361.1	HIST1H4B	LPP	IL12RB2	TMEM258	AC093849.2	ZFP36	AC017101.1	AC007009.1	RPL7	FNDC3B	AL133415.1	HLA-DQA2
35	IRF7	CDT1	IL2RB	EPHA2	TSC22D3	RN7SL832P	LINC02099	CD40	SLA2	LINC01991	CCR4	HIST1H2BG	UBE2G1	HLA-DRB5	CD3G	CHID1	HIST1H4H	SLAMF1	AC008676.1	EPHB2	RPS16	TPM4	GFPT1	IFITM2
36	CLEC7A	HMGN2	ARPC5	CHML	GLA	ABLIM2	LGALS3	MAP3K8	SH2D1A	PSRC1	TNFRSF9	NXF1	KIF11	RHOH	CD3E	SPCS1	S1PR2	EIF4E	INTS6L-AS1	TRIM31	MRPL12	ERGIC3	SSR2	CD52
37	FAM92B	DHFR	PSMB9	LINC00921	TSPYL2	ARL9	GPSM1	AC106858.1	XYLB	PTTG1	TMEM173	PARD6G-AS1	HIST1H2BM	BCAS4	GJB6	SEC11C	PCP2	ODAPH	KCNC1	PARD3B	EIF5A	UBE2J1	SELENOK	BTG1
38	SEL1L	CCNE1	MOB1A	FPR2	UBB	CORT	AL353152.2	SNX9	HK3	AURKB	IL1A	RND1	TRIM45	MYO1E	HIST1H1E	SCNN1B	HIST1H2BE	RRAD	AC063965.2	MUC17	MRPS34	RPL22L1	AHNAK	SYS1
39	H19	UNG	EPSTI1	WDR74	TIPARP	MS4A6A	RAMP1	KLF10	PRUNE2	JPT1	BCL11B	NFKBIZ	AC104590.1	BACH2	AL022724.3	XBP1	CFAP73	PELI1	AC016722.2	TM4SF5	PPA1	NFIL3	SDF2L1	SNX2
40	AC113143.1	HIST1H1A	UBE2L6	BAMBI	GPRC5D	AC091153.3	TSPAN2	SPIB	CD3D	HJURP	IL12RB2	GPR1	STON2	PAG1	TRAV36DV7	SMPDL3B	LMO2	VIM-AS1	EFNA2	KLF5	PDCD5	CABLES1	LRRC59	C1orf162
41	IFI35	RANBP1	RAC2	P2RY13	TCP1	ACPP	GSN	SERPINB9	CD3E	ACY3	TNFRSF18	POU3F1	NRG4	GGA2	AC012306.3	ERLEC1	HIST1H4C	TRAF1	HIST1H3H	CLDN7	TIMM13	WNT10A	ISG20	ARL4C
42	DHRS9	WDR76	SH3BGRL3	CLEC7A	CLK1	PRKCQ-AS1	FABP5	GNG2	FASLG	CBR3	TRAV8-2	MTRNR2L12	FGF7	MYBL1	AL163973.2	CNPY2	FADS1	TUBA1C	HIST1H3G	OPLAH	RPL27	GSTP1	EIF2AK3	TRBC2
43	BLVRB	ZWINT	SLC12A8	GAS2L1	MRPL18	MBOAT2	NEURL2	MIR222HG	DTHD1	ARL6IP1	LINC02195	HBEGF	DCHS1	CD53	AC008543.1	A1BG	BPTF	TSC22D3	CSPG5	HNF1A-AS1	COX6A1	ZBP1	SELENOS	RPS25
44	CSNK1E	MCM3	MYH9	CSF3R	PTGES3	CMTM1	SLCO4C1	GRASP	TRGV10	KIF20B	CD28	H3F3B	CASC1	TCL1A	CCR8	ICAM3	AICDA	ANKRD28	HIST1H3F	MARVELD3	PARK7	ITGB7	SLC1A5	RPS12
45	GLRX	DTL	DDX60	FPR1	DUSP1	TIGIT	ZYG11A	ITFG1-AS1	PTMS	AP003096.1	PCDHGA11	HSPB1	CHEK1	ZFP36L1	CEBPA	NAXE	AC010615.2	DNAJB9	TMPO	ELOVL7	NDUFS5	SPCS1	PCK2	HLA-DQB1
46	ZBP1	CENPH	MYL9	AC103591.3	PAIP2B	CXCL13	CBY3	AC092916.1	NELL2	CCNA2	TRAV8-6	MYLIP	SPC24	CA12	MICAL2	PLPP5	ZNF730	AL031985.4	SPAG5	PKDCC	RPL22L1	P2RX1	HDLBP	RPL38
47	TMED2	NRGN	ACTB	NAMPT	CHORDC1	AC079140.6	PEAK3	INA	IFNG	KIF2C	BATF	IER5L	NFXL1	CCDC195	UBXN10-AS1	DPM3	HIST1H3B	HOXB6	KNL1	BAIAP2L2	TRIP13	TIMP2	HAX1	HLA-DRB1
48	SPP1	H2AFZ	RESF1	OPN3	NKRF	TRGC2	GTF2IRD1	RCVRN	FNDC10	ATP5MGL	IGKV3D-11	HSPA2	TERT	ST8SIA5	F5	ICAM2	HAUS5	AC007879.2	LANCL3	TCF7L2	RPS24	LINC02363	PREB	LYSMD2
49	IGHG3	CCND3	TAP1	ADAMTSL4-AS1	PABPC4	LAIR2	RASAL2	LINC01412	GIMAP6	NUCKS1	CD3E	AC137932.2	KIF14	SPI1	MAF	NUCB2	PRC1-AS1	TNFRSF18	CDK1	SEMA6A	YIF1B	CYTIP	FTSJ1	PPP1R18
50	ST6GAL1	HMGB2	MX1	JAML	GLIS1	AC096992.2	ATP6V1F	TNFAIP3	CD244	AC004241.3	IL2RA	RSRP1	DCTN1	TRIM55	TOX2	FCRL5	LCP1	TPM4	TOMM20L	SPIRE2	GAPDH	ICAM2	SEC23B	HLA-DMB
51	CDK6	NASP	TNFRSF13B	IKZF2	STIP1	MAP1B	SIGLEC6	CMTM6	SV2A	AL390957.1	DUSP16	BTG2	HIST1H3G	PXDN	LCP2	VSIR	FAT1	LGALSL	ANKRD23	AC021218.1	NDUFB8	BMP6	SLC38A10	CD1C
52	MTRNR2L12	UBE2T	ITGB2	RNF213-AS1	CSRNP1	CARMIL3	PSORS1C1	WSB1	PARD6G	ZNF850	AC010754.1	DUSP2	LIN9	ACTR3	ZNRF1	MZB1	AC006480.2	CTSZ	HIST1H2BB	ACHE	GADD45GIP1	KLF13	COPG1	AFF3
53	TYMP	PXMP2	ZYX	IFIT2	SPATS2L	CD8B	GALE	RGS16	FYB1	HMGB2	RIMS1	TLX2	PLK4	AC009121.3	TMEM173	LMAN2	RUNDC3B	DUSP5	FAM111A	PXT1	EBNA1BP2	RAB30	OS9	BLK
54	TENT5C	HMGB1	DTX3L	MS4A6A	FOSB	BMERB1	HSD3B7	JUNB	CD5	HOXA-AS2	FYN	AP003469.2	AL034428.1	LAT2	IL2RA	PAIP2B	RGS13	GLA	HIST2H2AC	NR0B2	HMGB3	AC009570.2	PPIB	TGIF1
55	SMPDL3B	NCAPG	ZBED2	Z93241.1	TNFRSF18	MIR3142HG	PPARG	EMX1	PTGER2	KPNA2	FGF2	INTS6	CELSR2	HLA-DMB	BX005266.2	SPCS2	BIK	MYADM	GTSE1-DT	LGALS4	ATP5F1B	TENT5C	DERL2	HES1
56	SEC24A	ZNF367	PPP1R16B	SLC7A5	HMCES	OTULINL	IL2RB	AC104463.2	RCAN2	CENPA	S100A4	HIST2H2BF	ERCC6L	AC016168.2	AL133245.1	IGFLR1	GALNT14	DDX5	CDCA5	EPHA10	PSMA5	TAFA5	SRPRA	AC119396.1
57	GLG1	E2F2	CD19	ROBO3	RSRP1	GZMH	CLSTN3	PIKFYVE	CD7	TUBA1C	LINC01943	AC022915.2	SHCBP1	VNN2	AL135818.1	JCHAIN	MKI67	DDIT4-AS1	AL139106.1	BARX2	PSMA2	LDLR	ARMCX3	GRASP
58	APOL6	ALYREF	LINC00896	TMEM107	PRRG4	AC116535.1	AK4	ZFP36L1	GIMAP1	PRC1	STIL	NPPC	AC087276.2	SWAP70	AC073352.1	PLTP	TCL6	C16orf54	DNAH10	LINC00511	COPE	CHST12	FICD	LAPTM5
59	AC012236.1	NUDT1	AC106782.5	AL049840.5	DDIT4	AC011476.3	ZC3H12C	LITAF	THEMIS	RAD21	IL32	ID1	WDR62	EVL	RTKN2	OST4	FERMT3	RRP12	HECW2-AS1	HSD17B2	NDUFAB1	ABHD14A	P4HB	IGHD
60	LINC01484	TFDP1	EPB42	TRGV4	DUSP5	AC073140.2	CCR7	CHD1	LAG3	AC123768.5	Z98884.1	HIST1H2BK	MYO18A	BCL11A	IL1R2	GAS6	HIST1H2BJ	C11orf96	MKI67	LURAP1L	TPI1	AC007952.4	SLC17A9	RPL37
61	RSAD2	HIST1H2AM	CCDC83	PTHLH	PPP1R15A	ASTL	PTPRM	SKIL	FYN	KIF14	LINC00337	AC106707.1	NXPE3	BASP1	AC087289.5	QPRT	CBX5	PSAP	SGO1	TMEM51	PDIA6	AC007569.1	CANX	RPL11
62	CD38	E2F1	IFITM2	TREM1	AMPD1	DUSP4	ESPN	TSC22D2	AC010442.1	NUSAP1	FAM171B	AC025171.5	MNS1	TMEM123	KIF15	LMTK3	HIVEP3	TMEM156	KIF24	CACNA1D	NPM1	RRBP1	SHMT2	HLA-DQA1
63	TCIRG1	LMNB1	TLN1	AL162458.1	TMEM176B	LAG3	ST3GAL4	AC068870.2	PRSS23	PIF1	ITK	APOF	CENPO	SUSD3	CHRM3-AS2	KDELR1	SQLE	BACH1	ROCR	LAMA3	TIMM8B	AL391056.1	HSPA13	FTH1
64	LY6E	MYBL2	ARHGEF3	MTCP1	PDE4B	TMEM200A	TRIM47	METTL21A	GNLY	CKAP2	SH2D2A	ZFAND2A	FASN	CD180	LAYN	DNAJC4	HMGCR	FOSB	ECT2	AC107071.1	HSD17B10	ANKRD28	PDIA6	SNN
65	SERPINI1	CHEK1	CAPG	LDLRAD4	ATF3	AC022413.2	PAQR4	PXDC1	DPP4	SAPCD2	AC139887.5	GADD45G	AL158834.1	HLA-DRB1	IKZF4	GABARAP	HIST1H2BB	PNP	MND1	AC018653.3	GPI	IGHV4-59	SEL1L	SASH3
66	CPNE5	CDC25A	FGD2	AL021155.5	MB21D2	CD8A	H2AFY2	DDX3X	DOK2	NDC80	KCNIP2-AS1	IFRD1	LMNB2	CSK	NEIL3	TIMP1	MEF2B	NFKB1	TMPO-AS1	PLXNB1	ATP5PF	MYL2	VIM-AS1	LRRFIP1
67	ITPR2	ACAT2	SEPTIN9	AC004837.4	TENT5C	SCX	ACP5	FHDC1	AC005534.1	DEPDC1	C9orf153	ARL4D	EXO1	PFKFB3	AL592166.1	GNPTG	ZNF318	ARF4	AC092118.1	TEAD1	CCT7	NFE2L3	KDELR2	ARHGAP24
68	KCNN3	LIG1	PML	AC034236.2	HOMER3	AC123768.5	CHD4	MCOLN2	FLNA	SGPP1	SPOCK2	ZNF296	MCM10	TMEM156	CTLA4	SEC62	LINC01814	FAAH2	CENPI	TACSTD2	MTDH	SAT1	PABPC4	FOXP1
69	AP3D1	DBI	RBCK1	LINC00910	ALDH2	AC108673.3	AGAP3	TRAF1	CRTAM	CKS1B	LINC01281	SNHG1	P2RY6	LTB	SDC4	NME4	HMGCS1	HMCES	ALDH3B2	ARL14	RAN	GNAS	TENT5C	LINC00926
70	WNT5A	PTMA	ARHGAP9	SLC15A4	CPD	AL139317.5	TMEM44	SLC25A33	GIMAP5	TUBB2A	CD5	ATF3	KCNA3	DCAF12	WNK2	ITM2B	EEPD1	STX11	LINC00304	MUC3A	RPL15	CMTM7	MAN1A1	CXCL16
71	CCR2	CARHSP1	PLAC8	AL359232.1	FOSL2	TMED6	NACC1	DDX3Y	GIMAP7	SMC4	IKZF2	CDKN1C	KIF15	SERF2	ABRACL	TM9SF1	BCL11A	PPP1R15A	HIST1H2BC	TMPRSS4	ATP5F1A	FKBP11	SRP54	COMMD6
72	ZNF706	TUBB	PFN1	P2RY2	ID1	MAMLD1	MYL9	SH2B3	IL32	HMGN2	NMB	SLC38A2	AC010996.1	DEF8	LINC02321	CHPF	HIST1H1B	PPP1R10	SHCBP1	IGHV4-61	ATP5PO	ISCU	ATF5	NAPSA
73	AL161452.1	GMPS	ARPC4	AL353719.1	LMNA	AC010331.1	CEND1	JUND	FRMD4B	RACGAP1	MAF	SOCS1	OIP5	TERF2IP	HIST1H2AI	RABAC1	CENPP	EIF1	KIF11	FAT1	STOML2	TAPBPL	B9D1	MBP
74	SEL1L3	PFN1	CD86	AC026748.3	SLC5A3	POPDC2	IL21R-AS1	MYO1E	APOBEC3H	ECHDC3	ZBED2	MXD1	USP54	EPS15	CDCA4	FCGRT	AC011603.2	BHLHA15	HIST1H2BO	DOCK5	TRAP1	PHPT1	EEF2	RPS26
75	AC016074.2	RPA3	ADAR	AC069544.1	CIRBP	PRTFDC1	GPR161	CD80	CD247	MAD2L1	ZNF282	SOD2	NES	ARHGDIB	TUBB	CD59	MAST2	CHAC1	FAM92B	AL157813.2	COX8A	PRSS21	PHGDH	SF1
76	KCNK6	TCF19	HAPLN3	AC004906.1	RASGEF1B	CFAP58-DT	ZNF571-AS1	CCL22	OLFM2	CALM2	TBC1D4	HSPA1B	CSF2RB	CAMK1	OLFM2	BSG	AC073593.2	NFKBIA	MBOAT2	VIL1	NDUFS6	SOCS3	AL138963.4	TGFBR2
77	STBD1	CDK1	DOK1	G0S2	H3F3B	BTN1A1	TVP23A	PLEK	AC016596.1	C12orf75	AC117382.2	AC068492.1	AL049597.2	HRK	PIR	IFNAR2	IKBKE	CEBPB	AC008686.1	LAMB3	COX7B	ANKRD37	DSTN	BHLHE40
78	DERL1	PRKDC	UCP2	ADAMTSL5	NXPE4	TNFSF14	AC010615.2	MIR155HG	PSTPIP1	LBR	C6orf47-AS1	AC091271.1	FAM174B	NCOA3	BATF	NDUFB11	MME	AC017002.1	POLQ	CCL25	SNRPB	POU2AF1	SLC1A4	PLEKHO1
79	ISG15	DONSON	ZMIZ1	CFAP58-DT	TMEM52B	CCL5	PLBD2	SAMSN1	AC105446.1	TUBB2B	CPXM1	AC245014.3	MELK	MEF2C	FYB1	TCN2	TTTY14	APOBEC3B	TUBA1B	MICALL2	RPL23A	NLRP7	CHPF	IL16
80	LINC02694	HMGA1	RAB31	CPLX1	ARFGEF3	AC015971.1	DONSON	IL27	TBX20	MKI67	SIRPG	HSPA1L	CENPE	TCEA1	ZWINT	EEF1D	AC006064.4	MKNK2	AL357054.2	TNFRSF21	MRPL58	JTB	ARCN1	PARP15
81	CAV1	MYH10	OAS2	CCDC122	SLC22A17	NDC1	TSPO	KIF26B	AC019080.1	ECT2	DNA2	SRSF7	AL139353.2	ACTB	CD28	YIPF2	AL358472.2	AC044849.1	TEDC2	TGFA	LINC00462	TPST2	OSTC	SESN3
82	SOX5	CDCA5	LARGE-AS1	IL3RA	NEAT1	C9orf147	LCP1	BHLHE40	GIMAP4	NUF2	ZC3H12C	AC007384.1	PRC1	UCP2	FAM72A	MGST3	ATAD2	RAB1A	AC010325.1	MYO1A	LINC01923	LAMP5	TMED5	PMEPA1
83	IFIT1	ANP32B	S100A11	N4BP2L1	MIR29B2CHG	NKG7	RGS10	METRNL	ALOX5AP	TUBB4B	AL391987.4	EFNB2	NDC1	SKAP2	PHLDA3	ALKBH7	TXNDC16	PLK3	SOX9	DDC	LDHB	AC104699.1	TMEM39A	HVCN1
84	ATP7B	DMC1	AC083949.1	SERPINF1	JUN	CHIT1	NPFF	DDX5	TIGIT	ARHGAP11A	AC009148.1	AC009522.1	SHOX2	AL121787.1	BAX	TMEM147	AC011815.2	TNFAIP3	CKAP5	EPHA2	SERBP1	FBXW7	RTN3	FAM43A
85	AL133467.1	CHAF1B	DNAH17	CFD	NEDD4L	PRF1	AC005332.6	ZBTB1	CU634019.1	CDCA7	SEMA3F-AS1	MIR17HG	CENPP	NCF1	TK1	HEXB	EXPH5	NINJ1	PARP2	RAMP1	RPL7A	CTSH	SARS	PDLIM1
86	LMAN1	PAQR4	LIMK1	SPACA6	PNP	FAM92A	TMCC3	AC092118.2	TMEM275	ARL11	CD3D	SRSF2	MEIS2	MBD4	GZMM	AC078883.1	NHSL1	MGAT2	AC104561.4	GREB1L	RPL37A	SEC62	DDOST	SYPL1
87	FCGR2B	HNRNPF	TRAFD1	NPB	MRPS6	CD2	NINJ1	HSP90AB1	AP000593.3	TACC3	AC072054.1	SERPINE1	AL592435.1	STX7	HPSE	KCNN3	LINC00852	IL6R	HIST1H4D	KRT8	PRMT1	MB21D2	MGAT2	COL19A1
88	FNDC3B	DCTPP1	TPM3	ADTRP	NCAM1	MXRA7	LSP1	CREM	EOMES	PARPBP	CCDC74B	AC020916.1	AC087752.3	CORO1A	TRBC2	TMEM208	AKAP3	IFRD1	HIST1H2AB	DDAH1	AURKAIP1	MIR193BHG	GARS	TOMM7
89	LAP3	EZH2	SP100	MAN1A1	Z68871.1	AL512625.1	TNKS1BP1	CD70	GLB1L2	KIF11	TNFRSF8	AL627171.2	HDAC11-AS1	PRAG1	CD7	PHPT1	AC008264.2	NEU1	E2F7	RNF43	CCT2	PLEKHH3	ARF4	VAV3
90	BCL2L1	SET	TYMP	S100A16	JMJD6	METTL1	ENO3	TLR3	TRAV12-1	NCAPH	AC234917.3	AL021155.5	KIFC1	HLA-DPA1	ENO1	SURF1	FBXO43	AHNAK	SPC25	LINC01993	ATP5MF	ATRAID	XPOT	HLA-DMA
91	IGHVII-60-1	RRM2	AL359710.1	FZD6	IGHV3-13	INPP4B	BSG	AC093928.1	ABCA2	RCAN2	GPR161	ZNF844	PHF19	ITGB2	CD5	LAMP2	FKBP15	FAM49A	AL031733.2	CASKIN2	PSMB2	MAGED1	NUCB2	PHF23
92	DPPA3	SAE1	STAMBPL1	CNOT2	NR4A2	AL590550.1	ANXA11	SFPQ	INPP4B	DAAM1	CASS4	HSPA1A	LRRC59	ARPC3	PKM	CTHRC1	TBC1D1	ICAM1	RRM2	BNIP5	SEC61G	ITGA8	AC016888.1	DDAH2
93	HSPB2	RFC2	GPR137B	LINC01252	DAPP1	LINC02416	NPW	LTA	GRAP2	AICDA	TMCC2	HEXIM1	OSBP2	HLA-DQA2	ICOS	B2M	EZH2	AEN	KIAA1211	FBLIM1	GNG5	LAMP2	CDK2AP2	MGAT5
94	LINC01139	H2AFY	HLA-DPB1	TNFRSF9	PPP1R10	BIVM	ORC6	NFKBIZ	EVA1C	DCAF6	CRADD	AL356124.1	CFAP44	AMFR	GALM	TAPBPL	DNA2	LPXN	TOP2A	ASAH2	RPS7	ITM2A	UBE2J1	CALHM6
95	TCEAL7	PRIM2	IFITM3	IFITM3	RAPGEF2	KLRK1	TNFRSF1B	NAB2	DHCR24	KIF22	LAPTM4B	FOXJ1	AC107214.1	NAPSA	TYMS	TXNDC5	NCAPD2	UBE2H	RPH3A	OVOL1	NDUFS7	STAP1	ARFGAP3	PHACTR1
96	BTG2	SNRPA	PTPN18	VSIG10	LRIF1	EI24	CTSZ	DNAJA1	ANKRD13B	KIF18A	SPN	EPS8	CRYBB2	STAC3	LCK	MDK	AC009318.3	MAFF	RPEL1	PTPRF	ATP5PB	IRF1	UBXN4	STK17A
97	RNF213	MND1	TRIM22	SPHK1	SOD1	ZFYVE28	AC246817.1	ANKRD33B	SIRPG	AC078983.1	C9orf163	AL499604.1	FANCI	LCP1	OMG	NAGLU	USP22	ZNF250	AC027288.1	CXCL3	TUFM	GYPC	UFM1	PTPRC
98	MIR193BHG	DNAJC9	TSPAN33	TRPM2	GZF1	CD3D	HMOX1	UBALD2	SH3BGRL3	H2AFV	CCL20	AC123595.1	AC008551.1	CYB561A3	ADGRE1	RPS27L	HIST1H4A	GABARAPL1	SPRY4	EXOC3L4	RPS6	LINC02384	KCNK6	CHPT1
99	AC008443.6	MCM10	PTPRC	TBL1X	AL031666.3	PLK4	XKRX	KMT2E	CD2	AL353608.2	KANK3	VWC2	POLQ	CLEC2D	AC036108.2	LIME1	MSH2	GPR3	MIF-AS1	AP003680.1	RANBP1	ATP5IF1	SND1	EIF1B

## Sheet: B_normal
	pB1_N	pB2_N	pB3_N	contaminant	pB5_N	pB6_N	pB7_N	pB8_N	pB9_N	pB10_N	contaminant	pB12_N	pB13_N	pB14_N	pB15_N
0	SCN7A	MIR155HG	SUGCT	CST7	PLK1	LINGO1	AC018697.1	TRPM5	FOS	UHRF1	TRAV26-1	AC010931.2	HLA-DRA	MZB1	DAGLA
1	AC019077.1	TRIB1	SERPINA9	GZMH	ASPM	SLC26A3	PREX2	AC024592.2	IER2	PCNA	LRP12	NKX2-3	HLA-DPB1	SSR4	SERPINA4
2	AC211476.6	PDE4B	DTX1	GZMA	CENPF	LINC00486	HECW1	DPYSL3	JUN	RRM2	L34079.3	CCN3	HLA-DPA1	FKBP11	RNF185-AS1
3	ARHGEF26-AS1	SQSTM1	MME	LDB2	CDC20	AC017002.5	COL22A1	FRRS1L	EGR1	MCM10	CAPSL	EMCN	HLA-DQB1	SPCS1	TCN1
4	PCSK2	TRAF1	BMP7	SH2D1B	CENPA	AC244131.2	AC018678.1	MROH7	IER3	PKMYT1	TCP10	FAM107A	MS4A1	SEC11C	ARHGEF4
5	ADAMTS8	LMNA	AFF2	XCL2	UBE2C	AC008892.1	ADAMTS2	KLK13	UBB	ZWINT	GPR27	GHR	CD74	CYBA	ATP4A
6	SORCS1	NFKB1	ELL3	CD7	TOP2A	AC026470.2	AC245187.2	SH2D7	DUSP1	DTL	TRBV7-9	TM4SF18	HLA-DQA1	TXNDC5	SPINK1
7	IL1RAPL2	RRAD	TCL1A	TRGV9	CCNB2	ANKS1B	AC091912.3	AC002377.1	DNAJB1	MCM7	JAML	GPR4	HLA-DRB1	XBP1	IFI27
8	AC007682.1	GADD45A	SLC2A5	TNIP3	CCNB1	LHFPL3	PRRT1	ABCA13	GADD45B	RRM1	CTLA4	LINC01197	HLA-DRB5	SPCS2	CBLIF
9	NLGN4X	JUND	CD79B	GZMK	DLGAP5	LINC02661	HTRA1	AC019131.3	FOSB	CENPU	CD3E	RAMP3	CD83	KRTCAP2	IGFBP2
10	AL365214.2	EZR	BIK	NKG7	CDCA3	AL139807.1	ADAMTS1	CD300LF	NFKBIA	MCM4	IL26	ARHGAP29	BANK1	DERL3	LIFR
11	RASGEF1C	CSRNP1	NEIL1	KLRC1	TPX2	ASTN2-AS1	DPT	AC007906.2	JUNB	MCM3	CD3D	ECSCR	CD52	LMAN2	C7
12	PLSCR4	ARID5B	DCAF12	KIR2DL4	NUSAP1	AC060809.1	COL6A2	AC005920.1	SNHG12	CLSPN	CEBPD	PALMD	REL	SDF2L1	GATA6-AS1
13	AC079760.1	CYTOR	AL139020.1	PRF1	CDKN3	AL035416.1	COL5A1	ITPRID1	UBE2S	PCLAF	LRRN3	PCDH17	CD37	PPIB	MFSD4A
14	AC015914.1	CDKN1A	RAPGEF5	KLRC4	GTSE1	NR2E1	MATN2	POU2F3	CITED2	RANBP1	CD3G	FAM110D	LAPTM5	SPCS3	LINC02814
15	PGR	SLAMF1	BACH2	CCL18	AURKB	RHOJ	TIMP3	SH2D6	SNAI1	FEN1	FSD1	SOX18	HLA-DQA2	OST4	EPN3
16	SHISA9	SERPINB9	RGS13	TRAV2	CENPE	AC027329.1	COL6A1	KCNQ4	HSPB1	CDC25A	C11orf96	A2M	IFI30	TMEM258	TRIM50
17	AC005597.1	TNFRSF18	AC023590.1	LINC01694	PTTG1	AC007450.1	TUSC3	C2CD4B	SERTAD1	DUT	KLRB1	IGFBP7	FCMR	RPN2	PSCA
18	AQP4-AS1	MAP3K8	MEF2B	GNLY	PSRC1	CNTN3	ADAM33	CEACAM19	ID2	TYMS	CD40LG	CD36	NFKBID	SSR3	PHGR1
19	RUSC2	BIRC3	RFTN1	XCL1	CDCA8	STARD13-AS	COL12A1	LINC00443	PPP1R15A	CDC45	LINC00892	COL4A1	LTB	ERGIC3	PIGR
20	NTM	TRPV3	BCL7A	DTHD1	TROAP	AP000248.1	RARRES2	ANKRD18A	TUBB4B	CENPM	TRBV21-1	FXYD6	CD82	JCHAIN	ATP4B
21	SLC35F1	TNFAIP3	SORL1	TRDC	AURKA	AL137800.1	PMP22	MSX2	NRARP	TK1	TMIGD2	NES	YWHAZ	SEC61B	TFF1
22	FIGN	EIF4E	RBM38	CD247	HMMR	AADACL2-AS1	COL23A1	GABRP	HSPA1B	GINS2	CLEC7A	LIMCH1	TMSB4X	TMEM59	FOLR1
23	NEURL1B	PPP1R15A	ST14	FCER1G	NUF2	AC011092.2	FOXF2	PRR26	H2AFX	MCM2	TMPRSS6	SPARCL1	VASP	RABAC1	AL121761.1
24	SEMA6D	KDM6B	AC016168.2	CCL5	KIF20A	CYP2A7	COMP	TREH	RASD1	ASF1B	CD2	TM4SF1	SEMA7A	LMAN1	AC022217.2
25	CADM2	MAP2K3	KANK2	GZMB	NEK2	AL162414.1	HAP1	GLP1R	NFKBIZ	CDCA5	FYB1	VWF	NAPSA	UBE2J1	SLC1A3
26	ZNF536	NFKBIA	MYBL1	GZMM	CDK1	AC011477.3	GXYLT2	TMPRSS6	KLF2	RAD54L	CD4	KDR	LDLRAD4	CD63	AC084262.1
27	ANK2	VIM	TMC5	AOAH	CEP55	AC100768.1	TMEM176B	COL27A1	ZFAND2A	E2F8	TNFRSF25	TRIL	HLA-DMA	SELENOS	GASK1B
28	SCN1A-AS1	PIM3	COL9A3	TOGARAM2	BIRC5	AC010967.1	AC020743.2	CCSER1	DUSP2	MYBL2	LINC01871	TNFRSF19	TRBC2	TMED10	KRT8
29	RIMS1	MCL1	GCHFR	SH2D1A	HJURP	AL606489.1	POSTN	B4GALNT4	AC011446.2	HMGA1	S100A4	MGP	CMTM6	PRDX4	TMEM211
30	FRMD4A	MKNK2	MARCKSL1	RTP5	KIFC1	CNTN5	MEIS3	Z73429.1	AC245014.3	ENO1	CLEC12A	PROS1	CCR6	RPN1	CTSE
31	PRDM16	CTSZ	MYO1E	SLC4A4	KPNA2	AC009313.1	COL3A1	PTGFRN	POU3F1	HELLS	PROK2	MAOA	SPIB	HLA-C	GSTA1
32	SEMA3C	CD55	LPP	APBA2	HMGB2	AL121987.1	FBLN1	OGDHL	IER5L	ATAD2	COL5A3	AQP1	RHOG	HM13	TMPRSS2
33	AC023480.1	KLHL21	LINC01991	TRBC1	CKAP2L	GLRA1	MMP2	PLXNB1	HSP90AA1	CHAF1A	IL32	RBP7	BHLHE40	DAD1	ESRRG
34	GFRA1	ICAM1	UCP2	EOMES	DEPDC1	AC011997.1	RBMS3	GDF15	HSPA1A	EXO1	TYMS	DOCK1	LYN	SUB1	VSIG2
35	AL139294.1	ODAPH	SUSD3	KRT81	KIF14	LINC02726	CXCL14	PSTPIP2	HSPA1L	LMNB1	FAM241B	FOXF1	HLA-DMB	NDUFB11	RNASE1
36	TRIM74	TNFRSF12A	S1PR2	CD8A	KIF11	AP003086.1	LAMA4	PVR	BTG2	MCM6	AC006207.1	ISLR	PTPRC	KDELR2	SHC2
37	FOXD3	TEX14	RRM2B	KLHL4	ZNF385B	AL078604.4	COL4A6	HTR3E	DNAJB4	LDHA	CNIH2	FLNC	ACP5	CCR10	KRT19
38	LINC02637	IL23A	FGD6	TIGIT	CCNA2	AC022217.3	SERPING1	ACOX2	ATF3	ESCO2	MSC	CD34	SLC2A3	TENT5C	GPX2
39	COL8A1	SIAH2	HRK	IFITM1	BUB1	FP236383.3	MAMDC2	HEPACAM2	NXF1	ORC1	ANXA1	KITLG	CCR7	MYDGF	LARP6
40	AF127577.2	PELI1	RASAL1	SH2D2A	MKI67	ZNF341-AS1	C3	TPM1-AS	H3F3B	CDT1	PRKCQ	NFIB	TNFRSF1B	COPE	MXRA5
41	MEIS3	LGALSL	DMD	KLRD1	PRC1	FLACC1	KITLG	AL451050.2	HIST1H2AE	CDC6	RORC	TIE1	CD19	B2M	AP1M2
42	ADGRB3	H3F3B	A4GALT	ICOS	CKS1B	LINC02241	SOD3	LIPG	HIST1H2BG	DSCC1	CXCR6	TCF15	CXCR4	ITM2C	ALDH1A1
43	SCN9A	PNP	SEC14L1	THEMIS	KIF2C	AC017101.1	EMP2	ELF3	HIST1H2BK	FABP5	IL18RAP	RARB	RILPL2	TECR	S100P
44	ASAP2	DUSP5	LIMD2	PI3	TACC3	PRB1	MEG3	SPRY4	PLK2	FANCI	STARD6	BCAM	LY86	MANF	AGR2
45	AC022126.1	APOBEC3B	ABR	ITGA1	JPT1	AC007319.1	CHRD	PPP1R26-AS1	KCNQ1OT1	DNMT1	BCL6B	ANKRD65	LRRFIP1	MIF	SLC4A4
46	CDH19	EIF4A3	BCAS4	TRGV2	ARL6IP1	AC009570.2	CCDC74B	SH3BP4	ZNF296	RAD51	TRAT1	MMRN2	PLD4	CUTA	CDC42EP5
47	NAALADL2	TAGLN2	MIR3681HG	TRBV5-4	TUBA1C	MEF2C-AS2	PLXDC1	HOXB9	HSPA8	BRCA1	CD6	ADGRL4	RASGRP2	RRBP1	SIGLEC11
48	NRXN1	BCAR3	RMI2	CXCR6	LINC00698	AC103591.4	MXRA8	AC009065.2	AL021155.5	UBE2T	KIF23	PLVAP	CD53	SEC61G	TPPP3
49	DZIP1L	NINJ1	PTPN18	SLA2	TUBA1B	PAPPA-AS1	C1S	AC104534.1	HEXIM1	TUBB	RGL4	VWA1	MYH9	EDF1	TMEM92
50	CHST9	ZNF331	IRF8	FASLG	SGO2	TTLL10-AS1	ECM1	GGT5	HIST2H2AA4	NPM1	ZAP70	EGFL7	PIKFYVE	TMBIM6	FABP1
51	ATOH8	DDX5	SMAD9	AC073529.1	TTK	AL109615.3	COL1A2	KRT18	BAG3	H2AFZ	IL1R1	ACVRL1	SNX2	ATRAID	NCKAP1
52	AL049569.1	IFNGR2	TMEM123	GGT6	NCAPG	AC020743.2	BARX1	CDCP1	RHOB	RFC4	LINC01315	AC005082.1	LCP1	PDIA6	TMEM171
53	P3H2	FGL2	GGA2	CD3D	FAM72B	AL157388.1	CYP27A1	CLDN7	INTS6	HNRNPAB	KIF4A	OSMR	BCL2A1	ARSA	AC010761.2
54	XKR4	ANXA2	ACSF3	IL32	CDC25B	AP002954.1	MMP11	AP003068.1	DLL4	E2F1	SPC25	COL15A1	CAPG	RPLP1	IGF2BP2
55	CDH11	IQCG	OGG1	SEMA3F	KIF23	AC110741.1	RND3	KALRN	HBEGF	GMNN	CMTM8	GNG11	WSB1	TMEM208	PRSS23
56	SYN3	AQP3	LINC02832	APOBEC3H	ECT2	LIFR-AS1	MRVI1	FAM110C	RSRP1	TFDP1	TOGARAM2	CXCL12	PARP15	LIME1	WIPF3
57	KCNS3	ODC1	EML6	AC006372.3	CDC25C	SEC14L3	OLFML3	TNFRSF10C	HIST2H2BF	PRKDC	SIRPG	SLC9A3R2	IFITM2	DDOST	S100A6
58	TFAP2A	PPIF	MTA3	TRDV3	NDC80	CASQ1	EPHA2	IGHV3-42	SNHG1	FAM111B	GAL3ST2	FRMD4B	CYBB	JTB	C19orf33
59	MPZ	RGCC	BPTF	AC105180.1	DEPDC1B	FP671120.4	ZNF423	PLEKHG3	AC253572.2	WDR76	CD96	COX7A1	COTL1	DNAJC1	TOX3
60	ELN	SRGN	CCDC88A	KIR2DL3	SMC4	AC104365.1	MFAP4	MYCL	EIF4A3	MCM5	STMN1	HIGD1B	MYL12A	TXNDC11	COL4A5
61	AC097534.1	TGFB1	SOCS1	AC068700.2	STMN1	IDH2-DT	C12orf56	BNIP5	IER5	C1QBP	UBASH3A	IGFBP2	BTG1	P4HB	IGKV1D-42
62	AC135178.4	UBC	CD9	IFITM2	AC008870.3	GIPC2	LVRN	TSSK3	NEU1	RFC2	SPAG5	AC095055.1	CD40	OSTC	AKR7A3
63	MXRA8	WDR74	JAK1	TRBV6-5	TUBB	TET2-AS1	FN1	AC087241.2	HSPA6	ALYREF	NPAS2	PARVA	TRAF4	ICAM2	TACSTD2
64	BICC1	DNAJB9	PALD1	SLC27A2	KIF4A	DHFR	CCDC80	AC067750.1	PARD6G-AS1	RAN	SMIM3	DENND2A	GPSM3	UQCRQ	PRAP1
65	AGAP1	ANKRD28	H3F3A	GRAP2	SPAG5	C12orf40	BMP4	TIMP3	HIST1H4H	HIST1H4C	ARPC1B	KANK3	CHD1	JSRP1	LGALS4
66	TRHDE	NR4A1	FAM170B	TCEAL2	PALLD	AMPH	YAP1	NYNRIN	HIST1H2BF	CDCA7	ARHGEF39	CTDSPL	SESN3	TRAM1	MUC5AC
67	ZNF704	INSIG1	PALLD	GIMAP5	NCAPD2	ZNF214	METTL24	PLD1	MYLIP	HIST1H1B	TUBA1C	TMEM204	KDM6B	GSTP1	DIO2
68	CCN1	MAFF	FAM167A-AS1	CD2	ARHGAP11A	AL035458.2	AC108134.2	GATA4	HSP90AB1	YBX1	AC007098.1	TMEM173	SKIL	GUK1	TFF2
69	KCNIP4	AL133415.1	METRNL	TRGV10	KIF18B	STX17-AS1	CALD1	AP003419.2	SGK1	MAD2L1	AC046143.1	NRP1	CXCR5	KDELR1	LCN2
70	FRMD5	NFKB2	RHOH	CD8B	TG	TMEM178B	NBL1	AL358472.4	HSPH1	HMGN1	CD5	NLGN2	ARHGAP24	TXNDC15	S100A14
71	LGI4	GLA	LHFPL2	ZNF683	MAD2L1	AC005884.1	AC060766.4	GTF2IRD1	HIST3H2A	TRIP13	EVA1C	PGM5	SH3BGRL3	SELENOM	AL136131.3
72	AL022068.1	MXD1	CCDC85A	AC068870.2	GPSM2	AC010894.3	COL16A1	AL450322.2	NR4A1	PPIA	TUBB	TCIM	ITGAX	PDIA4	KCNMB2-AS1
73	SH3RF3	AHNAK	HLA-DMA	MARCH10	HASPIN	Z99127.1	SYNE4	AOC1	KCTD12	SLC25A5	ARHGAP19	CLEC3B	RASSF2	CNPY2	SLC44A4
74	AL606534.2	CFLAR	VNN2	TRAV17	PRKAR2B	AP001347.1	COL4A5	KLK11	AL499604.1	CHAF1B	PCLAF	GUCY1B1	RPS27	DNAJB11	RBPMS2
75	PLXDC2	UBE2H	MFHAS1	LAG3	FOXM1	APOL4	LUM	SEMA4G	HIST1H2AG	PKM	CD7	ELOVL7	RUNX3	CHID1	TMPRSS3
76	STARD13	TPM4	SLC1A1	TNFSF14	CALM2	AC079793.1	PRSS2	AC004771.5	AC007952.4	TUBA1B	AL096678.1	IGFBP3	LFNG	SSR2	SPDEF
77	DLC1	TUBB4B	ETS1	AL157402.2	RDM1	AC090644.1	FAM92A	DLG1-AS1	AL139246.5	NASP	IL2RB	SEMA3G	RGS19	HSP90B1	ORM2
78	MIR100HG	SELENOK	ANKRD13A	AC002310.2	RAD21	AC096564.1	LINC01841	AL365436.2	HIST3H2BB	UNG	AUTS2	CAVIN3	NR4A3	MLEC	SMIM22
79	AC017101.1	PLAUR	P2RY8	FYB1	GAS2L3	HCG17	VSTM2A	ADGRG6	HIST1H2BJ	SLC43A3	LRRC49	HSPG2	PPP1R18	CRELD2	FXYD3
80	PLEKHA5	DDIT4	RCSD1	C1orf21	H2AFV	AC004039.1	LY6H	PCSK5	RGS1	DEK	RHNO1	LAMA4	SNX9	SRM	REG4
81	NRG1	ARF4	CD22	PRKCQ-AS1	AL022068.1	BOLL	ITGA11	AP005717.1	AC239799.2	HMGB1	DPP4	RBP5	PLEKHO1	NME2	SMIM24
82	COL15A1	SOD2	ACY3	GIMAP4	CKAP2	AC115676.1	SHANK2	KLF1	SRSF7	SNRPG	RNF157	AC132938.6	MAP4K4	BSCL2	ESRP1
83	COL4A1	YPEL5	RBBP7	MAN1C1	ANP32E	AC020594.1	AC010271.2	TMEM158	SRSF2	DNAJC9	C21orf58	RAMP2	KMT2E	SERP1	LGALS3BP
84	COL5A2	ISG20	HMGN1	SAMD3	CKS2	LINC00910	SPARC	C5orf66	ANKRD37	PGAM1	L1TD1	PPP1R14A	GRASP	PLPP5	MMP15
85	KCNK5	MIR222HG	ZNF804A	CD5	OIP5	LINC01934	PTGDS	VIPR1	RND1	CHEK1	TGFBI	AL590302.1	FCRL4	TNFRSF17	CPA2
86	PDGFB	FOSL1	SPI1	NAGS	INCENP	AC068282.1	DCN	DACT3-AS1	AL024495.1	HIST1H3B	TMEM240	AL603832.1	ARPC1B	RPLP0	PLA2G4E-AS1
87	PDZRN3	BASP1	METAP2	AL360181.2	SKA2	SLC7A14-AS1	TMEM176A	CLDN4	MIDN	TPI1	PLCB1	FOXC1	ARL6IP5	SEC62	TSPAN8
88	AC098484.4	KMO	POU2F2	SYCE2	HMGN2	SYT9	CLEC3B	PKDCC	AC103591.3	SET	SYTL3	PODXL	RIPOR2	REEP5	LYZ
89	PAPPA	MIR4435-2HG	SLBP	ZNF726	AICDA	LNCAROD	ABI3BP	SEMA3F	HIST1H2BH	H2AFY	S100A6	NPDC1	SP110	PHPT1	ANPEP
90	AC104123.1	LPXN	CTPS2	KLRF1	SGO1	NECTIN3-AS1	MXRA5	PTPRG-AS1	ZC3H12A	GAPDH	NUSAP1	GIMAP7	CREM	COX5A	TFCP2L1
91	A2M	IFFO2	CXCR5	ACOT7	CDCA2	TMEM91	ENHO	AC018638.6	AC243772.2	PAICS	CD247	HDGFL3	PDE7A	EEF1D	ST6GALNAC1
92	KCTD15	STX11	AC068587.4	PPP2R2B	NUCKS1	AL022238.2	VIPR2	ITSN1	AC020916.1	PTMA	HMMR	PPIC	SFPQ	CLPTM1L	MYO10
93	NTN4	FAM49A	PARP1	CD3E	SPC24	AC006378.1	IGFBP7	INKA2-AS1	AF213884.3	AC011603.2	PFN1	ABO	RAC2	SIL1	FAM3B
94	ATP7B	SAT1	S100Z	GIMAP7	CENPI	AC019117.2	TNFRSF6B	GLUL	CDKN1A	EIF5A	LINC02449	AL033528.2	IRF2BPL	LGALS1	EHF
95	CBS	RAB30	CLEC2D	NDNF	CFAP73	AC104623.1	COL1A1	FUT2	SOCS3	TCF19	ARHGDIB	TEAD4	CHORDC1	ERLEC1	AL672310.1
96	PDE9A	HMCES	BCL2L11	CASTOR1	NCAPH	AC002401.1	COL4A1	CIART	AC020911.2	LSM4	FYN	NHSL2	SWAP70	NDUFB4	PRSS8
97	PAXBP1-AS1	LINC00158	ALOX5AP	APOC2	PLIN3	AC090515.4	RBPMS	AC093323.1	HIST1H2AM	LIG1	OTULINL	CDA	MTPN	CHPF	ADIRF
98	AC130324.2	BACH1	LRMP	MATK	BUB3	GPC5	PDZRN3	CDC42BPA	ARL4D	AC017007.5	TOP2A	FBXO17	CNN2	NPC2	PPARGC1A
99	FBXL7	ZNF165	CYS1	CD3G	LINC00824	AC079447.1	PRSS55	TSPAN15	MIR17HG	WDR87	LCK	TJP1	TSPAN33	RPL36AL	KRT20

## Sheet: Epithelial_B
	pEpi1_B (shared, FU2)	pEpi2_B (shared, FU1)	pEpi3_B (shared, FU2)	pEpi4_B (shared)	pEpi5_B (shared, normal)	pEpi6_B (shared, FU1)	pEpi7_B (shared, basaloid: KRT15, TP63)	pEpi8_B (unique, APOE)	pEpi9_B (shared, parietal: ATP4A, ATP4B)	pEpi10_B (shared, proliferation)	contaminant	pEpi12_B (shared)	pEpi13_B (shared, FU1: ASCL1)	pEpi14_B (unique, KLK6, KRT7)	contaminant	pEpi16_B (shared, KRT20)	pEpi17_B (shared, gastric mucosal, MHCII)	pEpi18_B (shared, FU2)	pEpi19_B (shared, adhesion)	pEpi20_B (shared)	pEpi21_B (shared, FU1)
0	HBD	FBXL20	ETHE1	SPRR2A	CALCA	PLA2G2A	LGALS7B	APOE	ATP4B	NUSAP1	PAX6	ALDOB	ASCL1	PLAAT3	SOD2	RPL13	PGC	PSMD3	DHRS9	XAGE2	VPS50
1	SLC4A1	TRAK1	LGALS4	SPRR2E	AC004540.2	PCCA	DSC3	NLRP2	ATP4A	CCNB1	CLTRN	CDHR5	BEX1	KLK6	FBXO2	RPS15	CXCL17	UBE2R2	CEACAM1	ERVH48-1	PEX1
2	AHSP	CTAG2	TSPO	SPRR1B	RAMP2	NOXO1	KRT5	GTSF1	MFSD4A	HMGB2	GAST	MEP1A	SYT1	KRT7	CFB	RPS26	C16orf89	NT5C3B	LAMC2	PEG3	KRIT1
3	GYPA	CDK12	EIF3K	CNFN	KLK12	EPHB2	LGALS7	APOC1	GPR155	UBE2C	SCGB2A1	FABP2	SCGN	DCBLD2	CD63	KRT20	FMOD	SMARCE1	TM4SF1	GATA3	ANKIB1
4	HBM	MED1	MGST3	KLK13	ISL1	LCN15	S100A2	FGG	KCNE2	CDC20	IGKC	C3orf85	C3orf14	PMEPA1	CXCL1	RPS18	MUC6	CASC3	ISG20	PSG4	CDK6
5	HEMGN	CTNNB1	AKR7A3	SLURP2	COL22A1	LGR5	KRT15	GPC3	CBLIF	TPX2	AC055839.2	ANPEP	SEPTIN1	RHOBTB3	TNFAIP6	RPL30	FAM3D	IGFBP4	ITGA2	SYCE1	FAM133B
6	RHAG	ERBB2	RABAC1	SBSN	PCDH20	SUPT4H1	KRT14	NLRP7	PTGER3	CDK1	IGHV4OR15-8	SLC6A19	DDC	CMTM7	ORM1	EIF1	MIA	KRT10	LMO7	LINC01356	RBM48
7	SPTA1	STARD3	CA2	SPRR2F	FAM155A	BMP4	TP63	TF	CLIC6	PLK1	AC023796.2	APOB	DNAJC12	EREG	AL079338.1	HIST1H2BB	AQP5	THRA	LAMB3	TNNT3	PLXDC1
8	GATA1	MIEN1	TSPAN8	S100A7	BAALC	CDX1	SOX15	APOC3	SLC16A7	PTTG1	AC117373.2	CIDEB	BEX4	CDKN2A	NEU4	LGALS2	LINC02688	ORMDL3	EPS8L1	SLC2A3	FZD1
9	RHD	PGAP3	TMEM54	RHCG	SYT4	GALNT9	TINCR	LCP1	ETNPPL	CCNA2	MZB1	SMIM24	TUSC3	CRIP2	SAA1	EGFR	LYZ	ACLY	CLDN18	TDRD12	AC079760.2
10	GYPB	CLU	BLVRB	PRSS27	SMAD9	KLK1	NSG1	APBB1IP	AQP4	BIRC5	IGLC2	SI	AL365394.1	VWA1	AC113346.1	Z93241.1	CD74	PPP1R1B	CD59	FABP7	AC091178.2
11	GYPE	AC005288.1	ANXA10	TGM1	KRT40	SLC12A2	CSRP2	FN1	LINC00671	CENPA	IGLV1-41	CREB3L3	KCTD12	TLCD1	C1S	ANGPTL4	TFF2	KRT23	CEACAM5	EZHIP	AC000065.2
12	KLF1	CXCL5	SPCS1	A2ML1	PELO	CD177	RND3	DIO1	KCNJ16	CCNB2	CD52	MTTP	CACNA1A	SLC16A3	HLA-DRB5	KAT2A	BPIFB1	GRB7	PLAUR	C1orf105	AC007566.1
13	CA1	CSAG1	TSTA3	S100A8	MAD1L1	BIK	FGFBP1	LDHB	PLCXD3	PRC1	CHGB	PHGR1	HES6	BCAT1	IL17C	CLDN3	MSMB	WIPF2	GPRC5A	MFAP5	AC000065.1
14	ALAS2	ULK4	AGR2	CRNN	MS4A8	NET1	TP53AIP1	FGA	ESRRG	CENPF	IGLV1-51	OTOP3	SLC7A14	MTAP	SDC4	REEP6	A4GNT	AKR1C3	RHOF	BNIP3	AC002454.1
15	EPB42	AC009283.1	AGR3	SPRR2D	CPE	ADGRB1	GPNMB	AC060780.1	GREM2	MKI67	PAM	C8G	NOVA1	PLAT	UGT1A6	URAD	LTF	NDUFB6	SDCBP2	PSG5	TOMM6
16	TAL1	ZDHHC24	TSPAN1	S100A7A	ELMO1	APBB2	TMPRSS11A	C1orf61	HRH2	HMMR	SHISAL2B	CHP2	ANXA13	PLAAT4	SAA2	RPL35	PDIA2	PRSS3	CD55	LINC02617	CNPY3
17	GYPC	MYBPC1	CYP2S1	SCEL	LDLRAD4	CCND2	KRT6A	SULT2A1	CKMT2	AURKB	ATXN8OS	PCK2	CNKSR3	CLIC3	KYNU	RPL37	HLA-DPB1	MED24	SNX9	C20orf141	FLNA
18	HBB	METTL27	CALML4	SPRR2B	RGS4	AXIN2	GJB2	DUSP9	CCKBR	KPNA2	KCNK16	CYP3A4	ENO3	CDA	C11orf96	AC023157.3	CA9	MSL1	FA2H	HSD3B1	MIEN1
19	ART4	DYNLT3	IQGAP2	S100A9	LINC01574	TST	DSG3	CALD1	CDH2	ASPM	ERO1B	TM6SF2	MAZ	MXRA8	CES1	AC023043.1	PRR4	APTX	SDR16C5	OPRK1	C6orf223
20	SLFN14	NDUFC2	PLBD1	HEPHL1	IRS2	ZNF703	SFN	PLTP	CKM	CDCA8	SSTR2	MME	YPEL3	FAM3C	COL9A3	UPK3A	NPDC1	TMEM99	C15orf48	XAGE3	MYL9
21	CR1L	LINC01287	LAD1	KRTDAP	SDC2	RPS29	SNAI2	LAMA1	SYNE1	CEP55	RTN1	BTNL3	TMCO3	ANXA1	GLRX	AC104534.1	REG1A	CNP	KLK10	FSTL1	XPO5
22	AC103876.1	AC006441.4	ATP5PO	TMPRSS11E	UCHL1	F10	CXCL14	SLC12A3	GBGT1	TUBA1B	SUCNR1	SLC13A2	RTBDN	TMEM147	CXCL8	TRIM54	SPDEF	STARD3	IL2RG	PSG8	MRPL14
23	SLC14A1	PF4	TRNP1	KRT6C	SOHLH1	PTGS2	HSPB8	GSTA1	KCNJ15	NUF2	GSG1L	TMPRSS15	CDK5RAP1	MMP7	SLCO4A1	RPS19	HLA-DRB1	FDPS	NECTIN2	AC099552.3	ZDHHC24
24	ARG1	SFTA2	KDELR1	KRT6B	CADM1	NRTN	CERS3	COX7B2	SIGLEC11	SMC4	PCSK1N	FABP1	FGF14	RBP1	S100A3	MZT2A	TESC	RARA	SEMA7A	LINC02723	HSP90AB1
25	ACKR1	SERPINA4	ANXA2	SPRR1A	TTC39C	TSNARE1	HSPB1	FGB	GLUL	KIFC1	KCNK17	C11orf86	NUPR1	EIF4EBP1	AKR1C1	TPGS1	HLA-DMA	APOD	PLIN3	DPPA3	TAGLN
26	ANKLE1	TMEM123	CYSTM1	IVL	AK5	LINC02691	SERPINB2	LRP2	G0S2	CKS2	DIRAS3	DHRS11	TMEM255B	GPAT2	UBD	SNHG7	C6orf58	TPD52L1	LIPH	MYCT1	MEA1
27	HBA2	CLDN2	SH3BGRL3	CALML5	AC099517.1	ATP5ME	NRARP	LINC01996	SLC25A4	DLGAP5	CRYGD	ERICH4	MEAF6	SYNGR2	GBP2	AP005482.1	HLA-DQB1	JUP	LAMA3	MAP1LC3C	ERBB2
28	HBA1	CHKA	COX6B1	SERPINB13	PRSS21	OSBPL5	CLCA2	TRIM50	ITIH5	CDKN3	DERL3	MEP1B	ELAVL4	MFSD10	SAA4	EGFR-AS1	DCHS2	CDC6	KCNK1	AC108752.1	YIPF3
29	MFSD2B	PTGER2	ANXA4	SPRR3	SCG3	H19	FABP5	VCX	IGFBP5	RACGAP1	IGHA1	APOA4	ARHGEF7	UBE2Z	C3	AC025164.1	HLA-DRB5	SMU1	HLA-E	CRH	C6orf132
30	MIR9-3HG	CTSB	COTL1	CYSRT1	LINC01436	GGH	THSD4	FCER1G	SLC26A9	GTSE1	SORCS1	TREH	SLC36A4	CAST	CD68	RPS28	FUT9	DNAJA1	PLEC	IGFBP3	MRPS10
31	HBQ1	DRAM1	CBLC	CSTA	CRTAC1	LIF	CALML3	VCX2	ESRRB	UBE2S	SCG5	SLC51A	INA	EVA1B	AL589787.1	APRT	FBP2	NUDT3	PPARD	AL162718.1	ERVW-1
32	GFI1B	LAMTOR1	CLIC1	SPRR2G	AOC1	KCNQ1	BGN	FABP3	CKB	CDCA3	NKX6-3	SULT1A1	PEX5L	REXO2	SERINC3	HIST1H2AE	SERPINA3	P3H4	MUC13	SLC27A6	CCL20
33	TRIM58	APLP2	KRT8	TMEM40	CHST9	KREMEN1	PRNP	DEFB1	RAP1GAP	CKAP2	PRKAR2B	HSD17B2	MAP1B	NTSR1	SAT1	NANOS3	HLA-DRA	NOL6	IL32	AC110619.1	SLC35B2
34	AC016629.2	CTSA	FXYD3	BPIFC	SCG2	FGFRL1	CLEC2B	FKBP10	GABARAPL1	DEPDC1	FCRL2	ALPI	WFDC2	PTGES	AC092821.3	RPL12	RNASE1	QPRT	HK2	KCNE5	VEGFA
35	AC073957.2	DHRS2	S100A6	CLCA4	ATP1A3	LRP8	FRMD6	KANK4	PRDM16-DT	AURKA	JCHAIN	FOLH1	BCAM	CAV2	LUCAT1	RPL7A	LIME1	PGAP3	PTPRH	H19	PPP2R5D
36	LY9	RGS5	CIB1	SERPINB3	SEZ6L	ITGA6	IFFO2	CLEC2L	LIFR	KIF23	CASR	RBP2	CMIP	SLC2A1	AL391056.1	RPS21	JUN	SMIM27	LMTK3	AP005202.1	MAGEA12
37	ACSL6	MAGEA4	NANS	PPL	LYG2	SNORC	ADH7	APOA1	RELL1	MAD2L1	CRYBA2	SLC15A1	MARCKS	PCDH7	OSER1	EPB41L5	ARHGDIG	MRLN	TMCC3	SLC6A2	BYSL
38	SNCA	DKK3	MMP28	PLA2G4E	DLGAP1-AS1	DDX21	BNC1	RGN	DACT1	KIF2C	TRPC4	TM4SF20	BEX2	ATP5MC1	CD47	HIST1H2AA	ZG16B	CREB3	SAMD9	FBLN1	ZNF318
39	SPTB	AL929091.1	PSMD8	HOPX	IFT57	SNHG8	PERP	RND2	GRIA4	NDC80	FFAR1	SULT1A2	TNNT1	LAMA4	CYP24A1	RPL36A	CGREF1	CCDC167	SLC6A14	PSG9	RPL7L1
40	TSPO2	IFI6	CFL1	TMPRSS11B	SEC11C	EPHB3	ATP1B3	FOLR3	KCNQ1	UBE2T	CPE	CDKN2B-AS1	CALY	LY6E	CXCL3	RPL28	IL33	IDI1	PCDH1	ZNF350-AS1	CXCL5
41	SLC25A37	BRI3	NAPRT	UPK3BL1	PCSK2	KIF26A	GJB6	IFI30	ZNF385B	NEK2	FEV	SLC5A1	PTOV1	ARHGAP23	ORM2	EGFL7	TCEA3	SNRPC	CEACAM6	HAND1	TNFRSF11B
42	TUBB1	GPAA1	ATP5MC3	TMPRSS11D	RET	MEGF6	ACKR3	GSTA2	TMEM132B	CENPE	GRIA3	CDHR2	STMN2	L1CAM	ST3GAL1	HAAO	AGR2	GLO1	CLDN23	ACTC1	PVT1
43	FLACC1	TACC1	TSPAN3	KRT6A	ARMH1	ADIRF	SERPINB5	RAC3	ALKAL2	TUBB	TMOD1	BTNL8	CT45A1	FAM133A	PFDN4	AL136962.1	RARRES2	MSMO1	KRT17	LINC-ROR	PRDX4
44	RFESD	GRB7	TXNDC17	CLDN17	FGF14-AS2	EIF3A	DAPL1	ZNF114	FRMD1	ANLN	AC097625.1	KHK	ID4	TIMP2	DUOXA2	RPL41	SPINK1	RARA-AS1	RHOC	CMTM3	SNPH
45	TRIM10	ENC1	CTSE	GLTP	JSRP1	PLA2G4A	DUSP7	CD7	SMIM38	H2AFZ	TMEM190	ADH4	MTSS1	PDCD5	PSMA7	CPNE7	FOLR1	EDNRB	ADGRF1	PTN	MAGEA6
46	LYL1	AMDHD2	CYC1	S100A12	CNRIP1	STK38L	MIR205HG	SPON2	RGMB	KIF20B	HMGCLL1	MGAM	RETREG1	SYNE4	SLPI	RPS12	PDILT	CYB5B	LINC00520	TMEM52B	CDC5L
47	NFE2	DAB2	RPL18	MAL	DCLK1	TMSB10	COL17A1	SUN3	CPA2	RRM2	PCSK2	SLC5A9	TTLL7	CMTM8	CCL20	RPS3	LIPF	MIR181A1HG	FLNB	AC006517.2	SLC66A1L
48	PIM1	EPHX1	ALDH2	KRT16	GRP	ARID5B	CRYAB	AC003093.1	AC108488.1	TROAP	KCNN3	TMEM253	KCNH6	MAB21L4	AC110741.1	HIST1H3J	HLA-DPA1	RPL27	CST6	EBI3	FOXP4
49	CD36	CST3	BAX	CSTB	PTPRN	IFITM10	ANXA8L1	IDH1	FNDC5	DTYMK	GRPR	C2orf88	LINC01608	KLK8	LCN2	TAF4B	PGA3	AC007130.1	SERPINB7	TUNAR	MRPL2
50	CDKN2D	FDFT1	ECH1	TMPRSS11F	BARX1	S100A4	NPR3	AP002954.2	SLC9A3	KIF20A	EGR4	TMEM82	TMEM59	CTSD	OSMR	CCDC85B	ADAM28	BZW2	MUC17	ANKRD1	C6orf226
51	OSBP2	ZG16B	SPINK5	KRT78	AC090241.2	MAP3K8	GBP6	GAMT	LRIG1	KNSTRN	AL589702.1	CYBRD1	KIF5C	EMC4	TNIP3	HIST1H4B	HPN	CCT3	TMBIM1	NPPB	AC108067.1
52	TRAK2	ITM2A	PYCARD	KRT13	ITGA1	ZNF511	IGFBP6	HP	TRG-AS1	NCAPG	PAUPAR	GPA33	DRAIC	CAPS	PDIA2	HIST1H4H	NUCB2	DPM3	SPINT1	PLAC9	MAP3K20-AS1
53	FECH	LIFR-AS1	UQCRFS1	AQP3	GRIN2C	ASCL2	PTHLH	NR1H4	GUCA1C	ARHGAP11A	SCG3	TTC36	HOXB8	LAMA5	RTEL1	HAP1	HLA-DQA1	TOPORS	CRB3	MS4A13	VKORC1L1
54	AC018398.1	PRDX4	LIMA1	SLURP1	TAGLN3	HUNK	PKP1	DMKN	CPM	FOXM1	C22orf42	XPNPEP2	HSPA2	F3	ADRM1	TMEM238	PIGR	HSP90AB1	CFLAR	L1TD1	PTK7
55	IKZF1	YAP1	RER1	LYPD3	NPPA	RPS20	WDR66	IGF2BP1	TMEM211	TUBB4B	RFX6	CES2	INSM1	RNASET2	PI3	PPP1R14A	CREB3L4	ELFN1-AS1	LYST	MYCNUT	TAF8
56	TBCEL	PRPS2	PLAC8	TGM3	CELF4	RHOB	LY6D	VAT1	CPEB4	TMPO	FCRL5	MS4A10	PRUNE2	PYGL	CHI3L2	MAFB	EGR1	NOX1	TACSTD2	CDH10	DNPH1
57	SLC6A9	APOBEC2	MYDGF	VSIG10L	AC004540.1	GABRB1	RAB38	C1R	TRIM50	KIF11	MAP6	MYO1A	NEB	CMTM6	LINC01215	HIST1H2BG	AC020656.1	IGFL2-AS1	FHL2	CDKN1C	MORC4
58	MPP1	SCPEP1	PLLP	PKP1	C2CD4B	CRAT	TMPRSS11D	FSCN1	AC116407.1	TACC3	SNRPN	EDN3	SCG5	MAGEB2	PSMB7	RPL36	SERTAD4-AS1	ECHDC3	OAS1	GJA5	TPM2
59	HMBS	AL365226.2	SSR3	DSG3	SNCA	PSME1	DENND2C	PRAME	APOBEC2	PBK	LILRB1	CLDN15	QPCT	CTSZ	OGFR	ARL6IP4	AC025154.2	PCSK9	COL6A1	TRIM6	RRP36
60	CLIC2	HEXB	ETFB	IL1RN	TAAR1	RIN1	DUSP1	MID1IP1	IL6ST	BUB1	NEUROD1	SMLR1	MLF1	AGRN	YWHAB	NKIRAS2	DNAJB1	AL139002.1	PRSS8	BASP1	TESC
61	BNIP3L	GATM	UQCR10	KRT24	PDE10A	SMIM3	CAV1	LINC01198	GATA6-AS1	CDCA2	LINC02795	ACY3	TUBA1A	RARRES1	SLC2A6	LRRD1	POU2AF1	HMGA1	SH3BGRL3	LIN28B	PAK1
62	JAZF1	CLPTM1L	VSIG1	CRCT1	FBLN7	DPEP1	BPGM	PPP1R14A	RAB11FIP2	ZWINT	LY6H	CYP4F2	CDKN2C	ITGA3	ICAM1	CLDN4	ENTPD8	BMP7	EPCAM	AC008753.2	MRPS18A
63	ITGA4	MAGEA6	VDAC1	ASPG	AC010478.1	C19orf48	DLK2	GJA1	LINC02758	CENPW	TNFRSF17	ENPP7	A1BG	UPK2	CD44	DUSP5	REG3A	UGT1A8	OPTN	PCAT14	CTNNB1
64	ZEB2	LY6E	SERPINB6	RNASE7	OR51E1	LINC02765	ARL4D	TUBB4A	CLCNKA	PCLAF	CD79A	PCK1	SEC11C	WNT11	LINC01038	RPS9	CAPN6	SRPK1	CHAC1	TRIM55	TRPV2
65	EPOR	MAGEA12	CAPNS1	LY6D	HOXB6	AC005392.2	CDH13	C1S	PDGFD	HJURP	SSTR5-AS1	PDZD3	ID2	PADI1	SERPINB4	RPL11	TENT5C	KRT19	TMPRSS2	SPSB4	CSF3
66	ANK1	MAGEC2	OCIAD2	FMO2	SELENOP	JCAD	FZD10	HSD17B14	SLITRK4	TTK	TSPAN2	SLC52A1	SLC38A11	NUP210	WDR72	GADD45GIP1	TMEM98	C7orf50	VNN1	AC025183.3	CLPTM1L
67	TENT5C	G6PD	UQCRC1	PI3	C18orf32	HEXD	PITX1	AL139042.1	IDH2	CKS1B	IGHA2	ACE2	RIMS2	CERCAM	GID8	HIST1H3A	GPX8	PSPH	DSG2	C1QTNF6	ARHGAP6
68	STRADB	PRSS23	UQCRH	KLK5	POU6F2	CHRNA7	TGFB1	CCL26	IGFBP2	LMNB1	MIR7-3HG	CIDEC	OR51E2	CLDN6	AC003093.1	SLC39A5	UBB	KRTAP4-1	RAB11FIP1	CENPVL3	PRCP
69	FAM210B	PIGR	PLA2G10	CLDN34	TOX2	RPS6	PTPN13	MFGE8	AL031429.2	HMGB1	MBOAT4	MYO15B	MPP1	LINC00665	ZMYND8	AC008734.2	CST3	KRTAP3-1	CDCP1	SLC18A3	AC087636.1
70	AC015971.1	ATP6AP2	LGALS9	CAPN14	GPX7	RPL37A	PMAIP1	TSPYL6	SLC4A2	SPC25	PDK4	MIR194-2HG	CADPS	LGALS3BP	FNDC3B	RPS5	VSIG2	CKS1B	UPP1	CT45A5	ABRACL
71	HIST1H3B	TNFRSF12A	ATP5PB	CLCA2	HEPACAM2	VCL	CAVIN1	SLC13A5	CHST3	NCAPD2	VSTM2L	SLC28A1	ST8SIA6-AS1	EPHX3	TNFAIP2	RAB5C	FOSB	MED1	FAM25A	AC006511.6	NT5E
72	NINJ2	POLD4	AXDND1	WFDC5	NSG2	TMA7	NFE2L2	OAT	DUSP4	TK1	GPR142	MOGAT2	SERPINF1	NR2F2	HLA-DRA	NDUFB9	SLC9A4	EIF1	CD9	LCMT1-AS2	ALYREF
73	NCOA4	CASK	PPIB	GBP6	KRTAP5-3	VIL1	NRG1	AMHR2	HPN	SGO2	KCNMA1	C1QTNF12	PEG10	PSORS1C2	NNMT	JUP	SCGB3A1	ACAT2	CCNG2	WNT7A	ABCB5
74	TMOD1	TPP1	GMDS	MAB21L4	CD99	RAB11FIP1	ZFP36L1	APOA2	RBPMS2	KNL1	GLT8D2	UGT1A1	SGSM1	RCN2	ACSL4	REX1BD	GLUL	NUDT5	RALGPS2	COL4A1	POLR1C
75	AC079804.3	LAPTM4B	SCP2	IL36A	LY6H	RPS27	VSNL1	PAGE2	HSPB7	HMGN2	FYB2	ACE	PPP1R1A	TBCB	BIRC3	AC027307.1	SELENBP1	ERBB2	PLAU	AC099552.1	KMT2A
76	AC021066.1	BCAP31	MICOS10	AC019349.1	NRN1	RUBCNL	PTPRZ1	HORMAD2-AS1	PXMP2	PSRC1	GNG2	AQP10	JAM3	CTSL	ZFAS1	CBR3	CYSTM1	TOP2A	MXD1	PSG11	CLNS1A
77	TMCC2	DAP	COX5A	EVPL	SCGB1D2	STK32C	IL20RB	CAPN3	SIK2	CKAP2L	PDK3	DHDH	OTULINL	EPS8L2	HLA-DQB1	KCTD5	ADH1C	TLN1	IRF7	OLR1	GTF3A
78	SLC25A39	NME3	PRELID1	KLK9	PARM1	PON2	THBD	SUGCT	ATP1B1	NCAPH	PTPRN	GDA	CRMP1	CPNE1	SERPINE1	AL109840.2	GP2	PTK7	LRP10	SIGLEC6	APLP2
79	AC091057.6	F5	MLPH	ALOX12B	AC005064.1	RPL34	BST2	ZNF208	XYLT2	KIF4A	BAIAP3	PRAP1	EEF1A2	FASN	POMP	HIST1H3G	KIAA1324	WDR77	ITPKC	UPK1A-AS1	NDUFC2
80	FAM234B	MCUR1	C19orf33	ZNF185	RBFOX1	PARP10	COPZ2	CHST13	SULT1B1	SGO1	KLHL6	TM4SF5	PFN2	PSMB1	IDO1	RPS24	TCN1	TESK1	CXCL16	LRRC4B	PPP1CA
81	AC079328.2	CCL28	RPS27L	C10orf99	TARS	SLCO4A1-AS1	RNF152	ENAH	GADD45B	CKAP5	CRYGB	LEAP2	NARS2	PKM	WFDC2	AQP1	GADD45B	RRP36	ITGB4	AC008759.3	TMEM63B
82	SMIM1	ARPC1B	CALM1	CALML3	SKAP1	TACR2	WNT10A	UBE2M	CTXND1	KIF22	IGHV4-34	APOA1	SRRM4	SRM	CTSA	MALRD1	RPS4Y1	NFX1	SCNN1D	PNMA8A	DGAT2
83	CKAP2	ERGIC3	CHMP2A	AC002511.2	SAP25	IFITM3	PRRG4	APOA5	CYB5R1	TOP2A	PCSK1	MYO7B	VWA5B2	MTA1	SGPP2	DBI	CD5	TOMM6	B2M	AC022140.1	TMEM45B
84	AC024267.1	GSTP1	YIF1A	KRT4	AC007222.2	RACK1	AQP3	CPN2	COL2A1	SPAG5	IGKV3D-11	PPP1R14D	RIC3	ALDH1A3	AK8	RPL23A	SLC4A4	PPIA	TINAGL1	FEZ1	FKBP1A
85	CENPE	LAMP2	EPN1	APOBEC3A	GOLPH3	RGS12	ANXA8	LRFN1	FGD4	BUB1B	GPX3	DGAT1	ATXN2L	RBM42	ZC3H12A	HIST1H2AL	IGFALS	TDO2	CGN	SPARC	EI24
86	BPGM	TMEM45B	IL1R2	DUOX1	MFAP2	CEMIP	SESN3	ERAL1	LINC02411	H2AFX	AC107373.1	APOBEC1	SERINC1	GPX4	PAEP	LSM7	FAM3B	MIEN1	IFNGR2	GPR146	ARCN1
87	RNF144A	C2	AP1M2	AC022201.1	BTG1	RPS2	TMEM158	PHGDH	Z82198.2	TYMS	IGKV3-20	EPHX2	TOX	AC244153.1	NEU1	DACT3-AS1	SYTL1	NUTF2	PRSS22	NKX2-4	LRP5
88	AC097372.1	COA4	PFN1	SDC1	VGF	HYAL3	SLC1A3	LARP6	ATG10-AS1	SKA3	IGHV4-39	CEACAM20	RAB3B	SLC25A39	PSAP	LINC02754	COLCA1	RNPS1	IL1RN	ZNF781	MRPL36
89	NANOGP8	KCNE3	SLC16A5	SLPI	CLDN11	PRXL2C	PDPN	GSTA4	DUSP19	TUBA1C	IGHV4-31	CHST5	BTBD3	CST7	RILPL2	MLXIPL	SOD3	MVD	GALNT5	AC005609.3	FAM92A
90	AC002558.3	ATP6AP1	DECR1	ALDH3B2	TMEM176B	RPL4	ID3	MIR548XHG	FGA	OIP5	KIAA0319	AMN	NR2F1	LSM14A	HLA-DPA1	HIST1H2AG	SELENOM	HINT2	EMP1	AC015522.1	AC087289.1
91	RBM38	SLC12A7	ETFA	BNIPL	NIPBL-DT	TMC8	FAT2	OLR1	AC008268.1	ECT2	IGLJ1	SLC51B	RBM38	IL15RA	CARHSP1	TRAPPC5	MUC5AC	METTL26	SPNS2	CCR5AS	ARSE
92	STOM	LAMP1	TMEM134	AL139393.2	OGDHL	IL15	CRABP2	LINC00221	FLRT3	BUB3	WNT4	HPGD	DLL1	TINAGL1	PRR20G	AC005920.1	ANKRD37	EFNA3	PLA2G2F	SLC1A3	CSAG1
93	ERMAP	SPTSSA	S100A10	RAET1L	PAH	IFT172	TNC	LINC02109	PPP2R3A	FAM83D	RCAN2	SLC2A5	AC005083.1	Z98257.1	GABRE	FKBP11	ARHGAP24	AP1S1	GCNT3	SLC2A1-AS1	AC145207.8
94	TNS1	BANCR	RHOA	IL36RN	GNAI1	PPA1	DLX2	ANGPTL3	TFR2	MYBL2	TCEAL2	SLC35G1	UBE2E2	PLEKHF1	MSN	NEFH	LDB2	CCT6A	CEMIP	CSF2RA	MAD2L1BP
95	KAT2B	PCSK1N	COX8A	CALML3-AS1	LSAMP	TRAF5	KRT13	SPP1	ECI2	KIF14	LDOC1	CBR1	CBFA2T2	RHOD	IL32	KRT10	TNFSF13	SIGMAR1	HIST1H2AC	CLIC4	AL365226.2
96	AL034374.1	STEAP2	SLC25A3	CRABP2	CTHRC1	GSDMA	IQCJ-SCHIP1	AP1M1	SLC26A7	DIAPH3	MS4A8	C1orf115	ST18	CAPG	BPIFA2	TMEM141	MAGED1	CNPY3	SEMA4B	UCA1	CASK
97	ORC1	GNPTG	NME2	SAMD9	EFCC1	RPL12	LYPD3	GPR161	GHR	RAD51AP1	OR52N5	HEBP1	RO60	ANXA9	MACROD2	CSKMT	SLC9A3R2	MEA1	RRAS	CT45A1	BUD23
98	PHOSPHO1	CYP51A1	RPS6	DMKN	CA6	KLHDC4	IRX4	VTN	MYRIP	CENPK	RFLNB	SLC26A3	GULP1	SVIL	SELENOM	PFDN5	IER2	MPLKIP	RIOK3	LTA	LAMP5
99	EIF2AK1	SLC66A1L	CHCHD10	SULT2B1	HOXB5	RPL36	GLTP	LAYN	TPD52L1	PIMREG	SLC22A17	UGT2A3	SCN3A	VGLL1	BID	AP005717.1	CITED2	G6PD	ANXA2	AJAP1	AC097709.1

## Sheet: Epithelial_F1
	pEpi1_FU1 (shared, KRT13, KRT4)	pEpi2_FU1 (unique, IL19, KRT24)	pEpi3_FU1 (shared, adhesion, KLK10, MSLN)	pEpi4_FU1 (shared, B)	contaminant	pEpi6_FU1 (shared, basaloid: KRT15,TP63)	pEpi7_FU1 (shared)	pEpi8_FU1 (shared)	contaminant	contaminant	pEpi11_FU1 (shared, B: ASCL1)	pEpi12_FU1 (shared, FU2)	pEpi13_FU1 (shared)	pEpi14_FU1 (shared, FU2: TFF3, SPINK4, MUC2)	pEpi15_FU1 (unique)	pEpi16_FU1 (unique)	pEpi18_FU1 (unique)	pEpi18_FU1 (shared, parietal: ATP4A, ATP4B)	pEpi19_FU1 (shared, enterochromaffin cells)	pEpi20_FU1 (shared, B)	pEpi21_FU1 (shared)	pEpi22_FU1 (shared, ISG)	pEpi23_FU1 (unique)	pEpi24_FU1 (shared)	pEpi25_FU1 (shared)	pEpi26_FU1 (shared, enteroendocrine)	pEpi27_FU1 (shared, proliferation)	pEpi28_FU1 (shared, B)	contaminant	pEpi30_FU1 (shared, NFkB)	pEpi31_FU1 (shared, MHCII)	pEpi32_FU1 (shared, mesenchymal)	pEpi33_FU1 (unique, LRP5)	contaminant	pEpi35_FU1 (shared, metaplasia: TFF1, MUC5AC)	pEpi36_FU1 (unique, IL17C, IL20)	pEpi37_FU1 (unique)	pEpi38_FU1 (shared, gastric mucosal: MUC6)	pEpi39_FU1 (shared)	pEpi40_FU1 (shared)	pEpi41_FU1 (unique)	pEpi42_FU1 (shared)	pEpi43_FU1 (shared, normal)	pEpi44_FU1 (shared, FU2: NME1)	pEpi45_FU1 (shared, FU2)	pEpi46_FU1 (unique)	contaminant	pEpi48_FU1 (shared, histone)
0	GBP6	AL162742.1	KLK10	C20orf27	C1QL2	KRT15	FABP1	LRP2	GAST	CCL18	SYT1	SH2D6	SPRR4	TFF3	APOD	TGFBI	FMR1NB	ATP4A	CHGA	PLA2G2A	CRISP1	CXCL10	CD8B	AC103409.1	C4BPB	GHRL	CCNB1	MIEN1	IGHV3-62	HSPA1B	HLA-DQA1	XAGE2	LRP5	IGHV3OR16-13	TFF1	AL583785.1	CD200R1	PGC	LINC00710	APOC3	AL137140.1	CCL25	AC005726.4	NME1	LINC01895	PAGE2	IGKV1-17	HIST1H1E
1	AC019349.1	IL19	MSLN	RPS5	IGKV6-21	TP63	GSTA1	SIGLEC6	ERO1B	C1QB	ASCL1	LRMP	AL034376.1	SPINK4	C20orf204	DCBLD2	RFPL4AL1	ATP4B	SLC18A2	LINC02691	ALOX12	CXCL11	WIF1	AC209154.1	SDCBP2	CFC1	CENPF	PLXDC1	IGKV1D-8	PPP1R15A	HLA-DPA1	IGFBP3	C11orf24	IGKV1D-43	GKN2	IL17C	AL731684.1	MUC6	TNIP3	APOA4	LIPN	GAS5	KRTDAP	EIF4A1	DENND10	GTSF1	AC233755.1	HIST1H1B
2	CRABP2	DUSP10	IL2RG	RPL8	IGLV2-11	TP53AIP1	RBP2	PEG3	PCSK2	C1QA	GRP	HCK	AL034376.2	ITLN1	DPEP1	UCHL1	MRGPRE	TRIM50	HDC	GALNT9	CRISP3	AL135937.1	PRAME	LINC01901	CDA	MBOAT4	TOP2A	RPL19	IGHV3-71	JUN	HLA-DPB1	SLC18A3	MRPL21	IGKV1D-12	PSCA	IL20	CCL22	FMOD	S100A7A	AQP10	SERPINA3	RPL34	KRT75	NQO1	FAM25A	COX7B2	IGHV4-80	HIST1H1D
3	AQP3	KRT24	TM4SF1	REG1A	IGHG1	DLK2	GSTA2	VGLL3	SSTR2	MS4A7	KCNH6	BMX	AC007387.3	CLCA1	UPK3A	CTHRC1	AL359924.1	MFSD4A	PTF1A	PTGS2	FLG	CTRB2	ASPSCR1	AC004917.1	IGFL2-AS1	ACSL1	TPX2	STARD3	JCHAIN	EGR1	HLA-DQB1	ART4	CAPZA2	IGKV1-27	MUC5AC	AC074387.1	MCHR1	LYZ	AL049552.2	ALPI	BCAT1	RPL3	DSG1	TPI1	LCE3A	PAGE5	IGKV1-9	HIST1H4C
4	S100A2	RECQL	TSPAN8	EBPL	IGHV3-30	CXCL14	SI	ERVH48-1	PAX6	C1QC	RTBDN	HPGDS	S100A7	MUC2	LY6G6D	MXRA8	AC108174.1	KCNE2	LHX5-AS1	CCND2	CRNN	IDO1	NTNG1	AC092100.1	RBCK1	LY6H	CDC20	PGAP3	TNFRSF17	ATF3	HLA-DRA	FN1	NDUFS8	IGKV1D-27	MUCL3	LINC01587	TMPRSS11F	LINC02688	ATP12A	APOA1	KLHDC7B	RPL29	KRT1	TAGLN2	AC074033.1	FTHL17	IGKV1OR2-108	HIST1H3B
5	KRT13	LINC02028	TSPAN3	ITPA	IGLV2-8	MOXD1	KHK	AL157829.1	PCSK1N	MS4A6A	SCGN	GNG13	IL23A	TPSG1	LINC00393	PRSS23	AL157371.2	CKB	RBPJL	CD177	FLG-AS1	IFIT1	EMX2	AC069061.2	ISG15	AC020909.2	PLK1	ERBB2	IGKV1-39	DNAJB1	CD74	FABP7	PPP6R3	IGHV3-74	GKN1	LINC00707	AL831711.1	C16orf89	IL10	CYP3A4	ESM1	SNHG29	WFDC5	EIF5A	AL158817.1	MAGEA4	FAM92B	HIST1H2AI
6	ADH7	RGSL1	ANXA4	SNHG7	IGHG3	BOC	HSD17B2	COL12A1	CES1	TYROBP	SEPTIN1	RGS13	HOPX	FCGBP	CALCB	LTBP2	TKTL1	GPR155	CPA1	LCN15	C3orf80	AIM2	AC009646.2	C3orf56	AC105460.1	VSTM2L	NUSAP1	CTNNB1	TAGAP	NR4A1	HLA-DRB5	SFRP1	KMT5B	IGHV4-39	CA2	LRRC32	RBKS	AQP5	TLR2	SLC46A1	SRD5A3	RPL26	LINC00640	AGR2	MT2A	FOLR3	RGS1	RRM2
7	KRT4	SLC24A4	CD9	PPIA	IGHV3-7	MIR205HG	UGT2A3	L1TD1	NKX6-3	CCL4	SLC7A14	TRPM5	CXCL1	ABCA4	MFAP2	LINC01801	MAD1L1	CKM	CCKBR	ZNF511	AC011611.3	MYEOV	COL9A3	ZNF114	MUC12	PTPRN	ASPM	CDK12	IGHM	FOSB	HLA-DRB1	PSG5	CTTN	IGKV1D-39	TFF2	LINC01705	SYNGR3	A4GNT	DOC2B	C8G	PIP	HMGCS2	FAT2	PFN1	AC133485.2	AC008825.1	MKX	HIST1H2AH
8	LY6D	AC084880.3	SDR16C5	MRPS24	IGHV3OR16-9	RYR1	KRT20	SIRPB2	AC055839.2	SIGLEC1	CALCA	SH2D7	SH2D1B	ZG16	PRAC2	CPZ	AC090192.2	CBLIF	PAPPA2	ADGRB1	RELN	IFITM2	NOTUM	LEP	PMEPA1	GC	UBE2C	TRAK1	IGLV3-25	HSPH1	DUSP27	XAGE3	DLD	IGHV4-28	S100P	IL1A	AC080129.1	PDIA2	CYP2E1	APOB	KRT17	RPL32	ADAD2	ATP5F1A	MT1X	MIR548XHG	EBF1	PCLAF
9	PKP1	SERPINH1	CST6	ELFN1-AS1	SHISAL2B	GPNMB	SLC35G1	PSG11	HAP1	AIF1	PEX5L	FAT3	PI3	LRRC26	CYP2W1	PCOLCE2	LINC02533	CLIC6	H1FOO	RUBCNL	SPRR2B	IFIT3	SERPIND1	ANKRD1	ISG20	TMOD1	PTTG1	GRB7	AC026369.3	HSPA1A	HLA-DMA	COL5A1	TES	IGHA1	VSIG2	STX11	AC092118.1	ZG16B	CLCA4	ENPP7	ITGB8	RPS9	AC009123.1	TSPO	MT1H	AC110614.1	FCRL4	HIST1H1A
10	LYPD3	SBK3	TSPAN1	RPS28	AL591518.1	NGFR	ACSL5	WNT6	SCG3	AL132709.8	CT45A1	ALOX5	FOXE1	KLK1	LGR6	AC013451.2	RIPOR2	ESRRG	AC104083.1	KIF26A	AL121933.2	IFIT2	SRARP	IL6	RALA	CYTL1	CCNB2	PPP1R1B	IGHV3-41	BAG3	C3	PTGES	MET	TRAV12-1	RNASE1	AC008972.1	PIK3IP1	CXCL17	KLK13	CDHR2	TGM1	OLFM4	CIDEA	DDT	MT1G	CTAG2	CD79A	PKMYT1
11	CALML3	CRYAB	SH3BGRL3	NDUFA4	IGLC2	KRT14	PIGR	STC2	SUCNR1	FCGR3A	SEC11C	HTR3E	LINC01333	GALNT8	FBLN2	MAGEB2	AP000842.3	LINC00671	CLPS	H19	MUC22	MMP13	SHISA9	ACTC1	CLIC5	TTR	CENPA	CSAG1	IGKV1D-39	NRARP	MIA	SERPINE1	TESMIN	AC079385.3	BCAS1	SPINK8	CDKN2A-DT	LIPF	AC002115.1	PRAP1	IL36G	RPS4Y1	TGM3	COTL1	KPRP	AL133334.1	IGHA2	HIST1H2AL
12	C10orf99	APOBEC3A	CDH17	TMEM147	AL365361.1	ACKR3	MTTP	AC103764.1	CPE	CD209	ELAVL4	ABI3BP	GRID1	CCL24	PRAC1	FAM133A	AL359237.1	COL2A1	CACNG2	GABRB1	ECM1	PLAAT2	RBP1	AF121898.1	PSMB9	SMOC1	CDKN3	FBXL20	AMPD1	JUNB	ASS1	AC006511.6	LTO1	CTSW	DDX60	AC226101.1	FAM83D	LTF	MRTFA-AS1	CIDEC	RP1L1	RPL35A	AC113383.1	HNRNPC	AC007834.1	RHOXF2	CXorf21	TK1
13	FABP5	IL36RN	LMTK3	MALSU1	IGLJ1	IL1R2	PCK2	P2RY6	FFAR1	CMKLR1	AL365394.1	PIK3CG	PEA15	GAU1	NENF	FXYD5	AC092327.2	FGA	LHX5	TMEM249	AL139393.2	AL353751.1	TTYH1	AL136129.1	C19orf33	AOX1	CDCA8	MAGEA12	DERL3	FOS	HLA-DQA2	COL4A1	CHKA	IGKC	NKX6-2	EREG	NDRG4	PGA3	AC004231.3	AL365226.2	PGLYRP4	EEF1B2	QRFPR	H2AFZ	AL845331.2	MAGEA4-AS1	IGKC	TYMS
14	CAPNS2	C15orf62	KRT19	SLC27A5	AC023034.1	CYYR1	HEBP1	CLIC4	FEV	LILRB4	DRAIC	FYB1	GLTP	SELENOM	CNMD	LINC00973	RFPL4A	FRMD1	IQSEC3	PCCA	LEXM	SPOCD1	ZIC1	NPPB	SULT2B1	PCSK1	MKI67	MED1	IGHV3-7	DUSP1	C2	AC004784.1	IGHMBP2	IGKV1-39	AL158206.1	LINC01405	TNFSF11	PDILT	APOBEC3B-AS1	ADA	KLK9	TRIM54	GJA1	LRRC59	AL033384.1	TSPYL6	IGKV1D-17	ASF1B
15	DAPL1	BCL6	TIMP1	RPLP0	AC011313.1	KRT32	CBR1	AMOT	PAM	CCL4L2	PKD2L1	GPR42	PNLIPRP3	RETNLB	AKR1C4	SRPX	LINC01517	GREM2	SPX	CASP1	AC108472.1	ISG15	AJAP1	ZNF350-AS1	CALB1	NSG2	BIRC5	BPIFA2	IGHV3OR16-9	IER2	LAMP5	OLR1	UNC93B1	JCHAIN	HPGD	AC005606.1	DUOXA2	DCHS2	SERPINB13	CIDEB	FAM83A	RPS2	GJB6	NDUFAB1	HILPDA	DSCR8	AP000880.1	CLSPN
16	KRT6C	UBE2H	KLK11	CYC1	AL357146.1	TNC	DHRS11	SLC2A3	CASR	SLAMF8	SLC38A11	HTR3C	AC244153.1	ST6GALNAC1	SFTA2	MMP7	LINC02365	SLC16A7	AP001993.1	LINC02765	PHLDA1	HERC5	AC022784.2	PRR20G	PDZK1IP1	LMCD1	HMGB2	MAGEA6	IGKC	KLF6	FAM3D	HSD3B1	CCND1	MZB1	LINC01133	TGM3	GPCPD1	PGA4	PGLYRP3	UGT1A1	LINC02188	RPL13	THEM5	TIMM17A	MT1M	LINC02109	AC000068.2	HIST1H4F
17	LGALS7B	DHRS9	TNFRSF12A	EIF3K	AMPD1	IL20RB	DGAT1	PROSER2-AS1	GSG1L	LILRB5	WFDC2	AZGP1	CARHSP1	RAB26	FKBP10	AC073210.3	ANKRD33	PTGER3	AL136090.1	PON2	SPRR3	IGKV1OR2-1	CST1	AC092353.2	OAS3	SNTG1	DLGAP5	CTAG2	PHACTR1	PMAIP1	CA4	EFHD1	ANO1	IGHA2	SYTL2	BPGM	TMPRSS11D	AC020656.1	LINC02487	CREB3L3	KLK4	RPS24	UPK1B	PGAM1	C4orf3	LINC00470	DERL3	HIST1H3D
18	KRT6B	RIPK4	ADAM9	RPS19	SCGB2A1	SOX15	SULT1A1	SEMA6D	MIR7-3HG	APOE	CNKSR3	B4GALNT4	VGLL1	REG4	AF127577.3	CLDN6	DDIT3	SIGLEC11	LINC02306	SUPT4H1	MUC21	GBP1	CLDN10	KCNE5	LAMB3	SNAP25	HMMR	LINC02119	SPINK2	ZFP36	ELF5	CCDC80	METRN	UTF1	VILL	KLK5	RAB31	PRR4	HEPHL1	SELENOP	APOBEC3A	RPS3A	AP001207.3	ANXA10	AL022067.1	LINC01198	MEF2C	ATAD2
19	LGALS7	DENND2C	ANXA3	PSMF1	IGHA2	NRG1	PHGR1	AL121820.3	KCNK16	GPR34	VWA5B2	GNAT3	DKK4	FRZB	TNNC1	ISM1	AC008691.1	PRDM16-DT	ERP27	MEGF6	TTC9	IL18BP	GSX1	EZHIP	PRSS3	AGT	GTSE1	C2	IGHV1-2	RHOB	DMBT1	SPARC	TCIRG1	IGKV1-6	ATP2A3	PORCN	AC104411.1	MSMB	SORCS2	SLC15A1	AL161785.1	RPL14	AKR1C2	MRPL3	LINC02621	MAGEA8	AC019077.1	HIST1H3C
20	IVL	TSC22D2	SYT13	CD320	LINC02397	PHYHIP	CRYL1	AL162718.1	SSTR5-AS1	ADORA3	CACNA1A	DKK3	KLK9	MB	QPRT	KRT7	HIST2H4A	CPA2	MAOB	LRP8	LRG1	OASL	LINC02413	GAGE1	PLAUR	WNK3	CENPE	MAGEA3	IGKV2-24	IER3	LCN2	NRK	AP003555.2	CD38	PSAPL1	AC011483.2	KLK5	ETV5	IRX1	AP006216.3	AL160408.6	NOP53	KRT17	XRCC6	MYZAP	RHOXF2B	JSRP1	ZWINT
21	ALDH3B2	ARL4C	EPCAM	RPL36	AC092720.2	THSD4	CHP2	ANGPT1	SCGB1D2	LINC01374	MAGEA1	DCLK2	CXCL6	HEPACAM2	FILIP1	PPP1R14A	MACROD2	HRH2	KIRREL2	SLC5A4-AS1	SPRR1B	IFITM1	C20orf85	PICSAR	DSC2	FFAR3	PRC1	MDK	AC100756.4	NFKBIA	S100A1	FBLN1	C12orf75	KCNA3	GSN	AC005083.1	AMPD3	FUT9	SERPINB4	C3orf85	HAS2	RPS15A	AL732437.1	ATP5F1C	AC087386.1	MAGEC2	BMP6	MYBL2
22	KRT6A	AC011483.2	AHNAK2	RPL18A	MZB1	EFEMP1	TKFC	AC024337.2	SCG5	AL117336.1	NCKAP1L	NPY	KLK12	TMEM61	HSPB6	DMKN	LINC01338	SLC25A4	TRPA1	GBP4	CRCT1	UNC93B1	ANOS1	LINC02154	UPP1	AL032819.3	CCNA2	CSAG2	IGHV1OR16-3	BTG2	HLA-DOA	AC132217.2	ST7	NRROS	MUC1	MARCO	TRIM17	LDB2	LY96	ADIRF	ADGRE2	RPL10A	FABP12	HNRNPA3	NIBAN2	COX8C	PCED1B-AS1	HIST1H3H
23	ANXA8L1	HMOX1	GPC1	RPL28	IGKV2D-28	S1PR5	SLC51A	C1S	RTN1	AC005522.1	DLL3	AVIL	PLAT	GPR153	GSTA3	CGB5	KLHL38	G0S2	PCDHA10	AP000527.1	ZNF365	OAS1	HOXD9	LINC02617	TAP1	CNIH2	CKS2	ULK4	LY96	AREG	CITED4	LINC01387	TPCN2	AC105402.3	GPX3	TNF	SMNDC1	CLU	TIFA	CD36	GBP5	RPL9	USH1G	SSBP1	CSTA	LINC01446	CD27	HELLS
24	CLCA2	KLK8	ANXA2	TOMM7	TSPAN2	NPR3	GNA11	STEAP1B	SCG2	LAPTM5	FGF14	PTGS1	SPRR1A	ATOH1	APBB1IP	CGB3	AL162717.1	AQP4	RAB3C	LGR5	NKAIN1	USP18	TAC1	SUN3	PPP1R14B-AS1	CDK5R2	KPNA2	CLCN4	CD27	BRD2	TCN1	DSCR4	THAP5	MEI1	LGALS9C	KLK7	ERO1A	NPDC1	IL36G	NPC1L1	DNASE1L3	RPL24	KRT6B	DCTPP1	RBP7	AC011840.1	TNFRSF17	CENPM
25	BBOX1	SLC6A14	HEPH	RPS7	JSRP1	BGN	SLC51B	AL390835.1	CHGB	RGS1	PDZRN3	POU2F3	PRDM1	KCNMA1	FOXH1	ADAM19	GPR176	FABP3	P2RY14	HGFAC	SPRR2A	SHANK2	ADAMTS18	AL732372.1	UCA1	PDE8B	AURKA	AP001120.5	IGHV3-72	SOCS3	HLA-DMB	CCIN	LAMB1	FAM49A	CAPN8	SPATA46	CDKN2AIP	TCN1	MTNR1A	ANPEP	RAB31	RPL36A	AC090004.2	TOMM22	RNASE7	AL691420.1	AC034102.5	FEN1
26	SLC39A2	SESN2	CDH1	MRPS26	IGHG4	CDH13	CYBRD1	DEGS1	MS4A8	CCL3L1	MAP1B	KCNQ4	HEPHL1	NEURL1	ITGA9	EDIL3	RMND5A	KLHDC8A	SLC35F3	GSDMA	PORCN	SECTM1	TRH	CTAG1A	RHOC	CDH10	KIF23	TUBB2B	PGLYRP2	HSPA6	OBP2B	MYO16-AS1	CAV2	PIRT	VSIG1	NCCRP1	SPEM2	SPDEF	VWF	LEAP2	SOCS2	RPS14	LPAR3	SSR3	LINC01214	AL139042.1	IGHA1	HIST1H2AG
27	BARX2	KLK6	CEACAM6	CCT6A	CTSW	CH25H	FABP2	ZNF732	HMGCLL1	MPEG1	KIF5C	MATK	ST3GAL4	CHRNA7	LINC01213	QPCT	PNMA5	CCNJL	GFRA3	EPHB2	AC079630.1	GBP4	NFE2	EDN2	FSTL3	AC016999.1	CKAP2	CSF3	TNFRSF4	GADD45B	TMPRSS3	AC117488.1	ZNF706	AC104699.1	B4GALNT3	KLK6	AC016590.2	KIAA1324	FMO2	MPP1	RNF225	RPS6	AC080038.1	C1QBP	ATG9B	LINC02652	SPINK2	HIST2H2AB
28	DSG3	NXN	RNF128	TMEM230	CD79A	TFAP2B	OTC	LINC01960	AK5	HAVCR2	SPOCK1	HOTAIRM1	S100A8	RAP1GAP	KCNC2	LINC02601	SPHK1	KCNQ1	FGL1	PLA2G4A	C5orf66-AS1	BATF3	FMO3	BHMT2	CDKN2A	TMEM132C	CEP55	TMEM176A	MZB1	TENT5A	CST3	NKAIN4	SHANK2	P2RY8	CTSE	CRYM	TXNDC2	C6orf58	SRD5A3	ENPP3	IL1RAP	RPL15	CARD18	TIMM8B	NDUFA4L2	CSAG1	AMPD1	PCNA
29	SERPINB3	LINC01503	GPRC5A	RPS18	VIM	ATP1B3	CES2	HCAR2	RFX6	AP002336.2	JAM3	PLCG2	LINC02448	LINC00261	NES	CD109	AL035425.1	SYNE1	ITGBL1	COL13A1	IL36A	TCIRG1	FGF8	UCA1	IRF7	VGF	KIF2C	AC079760.2	IGKV1-5	IFRD1	OR51B5	TMEM52B	ASPH	LINC01927	GALNT6	UPK3B	AL592429.2	GAMT	FAM157C	TM4SF20	CFB	RPS3	CERNA2	PRDX3	SPINK7	ACTL8	AC012645.3	CDCA5
30	RHOV	VASN	AKAP12	RPL10	IGKC	PRRX1	ALDOB	PSG3	CD52	SPI1	DDC	AP002856.2	SPRR2F	GSN	ALKAL1	AXL	CACNG6	LIFR	MAT1A	MAP3K8	SPRR5	TNFSF10	AL589787.1	LTA	FERMT1	ABCC9	KIF20A	CYP51A1	AC009570.2	FOSL1	LINC01819	LOXL2	ALDH3B1	TNFRSF17	RASEF	SCNN1D	GLIPR1	CLDN2	CEACAM7	MME	LINC00160	LGALS2	AL158071.1	CCT7	LINC02471	TEX41	BRSK1	C21orf58
31	GJB5	CRYM	MVP	RPL30	ABCB4	WNT10A	MEP1A	FOLR1	KCNK3	LY86	ST18	TAS1R3	GLUL	LINC01550	TSTD1	IGHV5-78	LMF1-AS1	TM7SF2	AL158212.5	IL15	CSTB	IFI35	PCP4	MAGEA10	CDC25B	TMIGD1	AURKB	AP000357.2	SRGN	UBC	AC016590.4	ODAPH	AC007325.2	C6orf58	APOL1	KRT16	HS3ST1	EPHB3	RNF149	ATP8B2	SLCO4A1	RPL17	NOTCH3	MRPS35	MGAT1	RFPL4B	AC003965.1	E2F7
32	SBSN	TSPAN10	MGLL	GTF3A	TAGAP	SLC1A3	OAT	PHLDB2	CRYBA2	MS4A4A	CRMP1	ALOX12B	KRT80	SMIM3	SP5	AL391069.1	MAGEB1	APOBEC2	AC126696.1	AXIN2	SPRR2E	MX1	SNORC	H19	PDLIM7	S100A1	DEPDC1	LGSN	AP006621.4	KLF4	CXCL17	WNT7A	FFAR4	DERL3	LGALS9B	AC087749.2	ASCC2	NUCB2	CAPN14	ENPEP	CCN2	RPL39	DSC3	RPSA	GCOM1	MKRN3	TDRD9	ESCO2
33	CLEC2B	CNGB1	CLDN7	EEF1D	CD38	IRX4	TM4SF4	LINC01287	NEUROD1	FCER1G	INSM1	CMYA5	TGFA	TRBV27	WDR72	L1CAM	SHISA8	DNER	COL18A1-AS2	TSPEAR	SPRR2D	UBE2L6	EMX2OS	LINC01764	SEC61G	BHMT	UBE2S	SMPX	TNFRSF13B	CSRNP1	CFB	PSG6	PNPLA8	HTR1E	PLA2G10	SNCG	F3	LRMDA	PI3	CDHR5	MYO1B	RPL12	ZNF750	ATP5MC1	ALDH1A3	UPK2	AF274853.1	TUBB
34	KRT5	NOXO1	TMEM265	RPP21	AC111006.1	CERNA2	MOGAT2	ADAMTSL4	CLTRN	AC011322.1	RETREG1	SDC2	PRSS27	LINC00570	AC106875.1	LUZP2	CEP85	TMEM132B	OR52L1	BMP4	GYS2	ISG20	GJB1	LUCAT1	CDH15	PALLD	PIF1	ARID3C	FAM30A	JUND	PLAAT4	TSPY9P	ADAMTS2	ITGA4	FER1L6	AC012081.2	RIN3	GPER1	STRA6	ASAH2	ANXA1	RPS8	LTB4R	TUFM	SYNPO2L	AL035446.2	MZB1	DUT
35	SERPINB11	LINC01932	SLC16A5	RPLP1	ADGRA1	COL7A1	PTGR1	CSF1R	TSPAN2	AC068831.6	CPB2-AS1	CRTAC1	SLURP2	STXBP5-AS1	RPL39L	TIMP4	ZNF292	IGFBP5	AL035409.1	AL589182.1	SPINK5	TYMP	MEST	AL121827.2	DNTTIP1	CLU	KNSTRN	DHRS2	AC005261.2	PLK2	PRRX2	SLC6A2	CPT1A	PRKAR2B	CLDN18	IL23A	STEAP4	BPIFB1	SLPI	CYP2D6	ICAM1	RPS23	COL5A3	PARK7	AL355512.1	LINC01524	U62317.4	HIST1H3F
36	PERP	PAX9	ABHD2	RPS15	TNFRSF4	FJX1	SLC5A1	PSG9	C1orf127	CCL3	OR51E2	IL25	SLPI	ENTPD8	CLDN3	APOE	COLEC11	GRIA4	NALCN	NET1	CNFN	BATF2	CST2	LY6K	RNF213	GDAP1L1	TROAP	RAMP1	AC068700.2	HBEGF	SAA1	PSG1	IFITM1	DNASE2B	RFLNA	PRSS27	RDH10	ARHGDIG	SERPINB1	SAT2	CXCL8	RPS18	AC019080.1	RANBP1	SLURP1	LINC02672	NELL1	HMGB2
37	FGFBP1	NECTIN4	FA2H	CHCHD2	IGHV3-53	CAV1	MYO1A	GLDC	PRKAR2B	APOC1	HOXD11	PIK3R5	SH3GL3	SPDEF	CTXN1	GPAT2	UAP1L1	SERPINA5	FAM163B	GBP1	KRT78	RSAD2	LINC01817	CERCAM	CLTB	TMEM190	PSRC1	AL133329.1	PTHLH	SLC38A2	MUC4	PSG2	S100A4	LINC01602	SOSTDC1	MDFIC	TCP11L2	CAPN6	AC027811.1	ALDOB	RDH10	RPL37	KRT16	SLC25A3	SLC24A3	AC129926.2	CCDC184	LIG1
38	SFN	ADORA2A	ANXA10	RPL35	GRIA3	CHL1	SMIM24	AC093821.1	KIAA0319	VIM	SDK2	LINC02576	S100A9	LGALS4	CNPY3	FKBP10	METTL27	RAP1GAP	SLC18A1	DDX21	PABPC1	TNFSF13B	AP003400.1	SYCE1	DYNLT3	LINC01811	NDC80	PLEKHB1	SPACA3	DNAJA4	BST2	TENM3	FGF3	BAALC-AS2	SMIM6	GLUL	ICAM1	AC025154.2	AC055807.1	MEP1B	HK2	RPS27	ZNF385A	RHOA	SASH1	LINC02663	AC016738.1	CDC45
39	DSP	FAM78B	C4orf48	THEM6	SMIM41	CYP11A1	PEBP1	CXCR6	PDK3	FPR3	POU4F1	CD300LF	KLK8	AC011523.1	IGF2BP1	AC110285.3	SRGAP3-AS2	RGMB	SV2C	LIF	TMPRSS11E	APOL4	EGFL7	LOXL2	ZBP1	DIRAS1	BUB1	NEUROD2	IGLJ1	AC020916.1	SELENBP1	GJA5	HOXC10	LINC01586	AKR1B10	RHCG	FMO2	PTP4A3	AC005392.3	SLC13A2	SRD5A3-AS1	EEF1G	FAM83C	PHB	TMPRSS11B	DCAF4L2	IGKV1D-33	FANCI
40	PGD	AC012414.5	CTNNA1	RPS21	SCG5	GLI3	ACY1	AC009292.1	KCNK17	AC064807.4	INA	AC069410.1	AC022872.1	ESPNL	PTK7	PMEPA1	AC092384.1	CHST3	SERPINA10	STK38L	SPATA5L1	WARS	UGT2B4	LINC02814	PLEC	SLC30A8	NEK2	TACC1	AL133467.1	DNAJA1	CPVL	AADACL3	CEACAM5	AC078883.1	PLAAT2	PPP1R14C	LRRC32	AC010185.1	TCAF2C	C11orf86	COL8A2	CLDN15	CLCA2	ATP5F1B	CRCT1	PAGE4	BTK	MELK
41	RRAGD	DNAJB6	PPIC	RPL6	CLTRN	HCAR3	FBP1	NLRP2	LINC02106	LINC00900	ST8SIA6-AS1	GRASP	CNFN	HES6	TNNC2	IL13RA2	AC022463.1	SULT2A1	FAM171B	SAA2	CYSRT1	EPSTI1	BAMBI	AC079313.2	TUBA4A	SLC8A1	KIFC1	CACNB1	CD79B	MCL1	PLTP	PSG4	CEACAM6	CD27	ACER2	EMP1	PDP1	AC008641.1	PRDM7	C17orf78	PLAT	SLC25A6	SLC16A6	DANCR	PPL	GPC3	IGHV2-26	MCM7
42	NIPAL4	RASGEF1B	SH3KBP1	RARRES1	SORCS1	PDPN	TMPRSS15	NCF4-AS1	PAUPAR	FOLR2	LINC00355	HMX3	KLK13	RASD2	GPNMB	B3GALNT1	FBXL20	ALKAL2	TCEAL2	CMTM6	GRPEL2	OAS2	WFDC9	FGF21	ETV7	VTN	CDK1	CXCL5	ASB15	MAFF	MUC1	IGF2-AS	LINC02747	HERPUD1	SULT1C2	SLC10A6	DHRS9	SPATA8	FAM83A	ACE2	AC108449.1	RPS29	ELOVL4	ALYREF	TUFT1	LIPC	AL133415.1	ATAD5
43	TPD52L1	ADM	LAMC2	TIMM13	FAM218A	COL18A1	MALL	SLC7A4	KCNT2	OTOA	BEX2	AC022039.1	PTCSC2	WNK4	IFI30	TCEA2	CIART	TBC1D14	CCDC184	AL022316.1	SCEL	TGM2	SLC1A5	VSTM1	HLA-E	SLC12A5	KIF20B	LAPTM4B	LAX1	ZC3H12A	ADRB1	CLDN6	RPS26	LILRB1	SLC5A5	PLAT	AC011483.2	PGA5	TMPRSS11F	PPP1R14D	PTTG1IP	FCGRT	NDN	GAPDH	LPIN1	LINC01205	IKZF3	CDK1
44	RGMA	TP53INP2	SMIM31	GGCT	PRKAR2B	SNAI2	MS4A10	DOCK9	C22orf42	IGSF6	CAMK1D	OR14A16	TEPP	UBTFL1	AC108134.3	LGALS1	JMY	GBGT1	DIRAS3	BIK	ANKRD37	TRIM22	GGH	BMP5	HLA-F	FRMPD4	CDCA3	AC244102.3	FAM49A	TNFSF9	LYRM1	FSTL1	MYEOV	AP002852.1	FAM177B	CPA4	POLB	RGS5	COL8A2	ACY3	SDC1	RPL41	PKP1	VDAC3	SPNS2	AL035446.1	AC010538.1	CENPK
45	KLC3	AMOTL2	CIAO2B	DDRGK1	HERPUD1	SLC27A6	GPD1	IGF2	TRPC4	LINC01857	BEX1	AC018653.4	CYTOR	UGT2B7	AL591501.1	APOBEC3G	MAGEA9B	LRIG1	PAK3	IFITM10	AC005392.2	DDX58	TGFB2	KHDC1L	EPSTI1	PPP1R1A	NUF2	BET1	LRRC8C	INTS6	NPDC1	CSF2RA	DNAJB9	IGHV3-30	CYP2S1	ZNF185	LINC01226	FAM3D	SERPINB11	PLIN2	LINC01932	MPST	STEAP1B	MGST1	LMO2	CHST13	AF213884.3	DHFR
46	TRIM29	SH2D1B	KRT8	ZFAS1	IGHV3-64	CERS3	XPNPEP2	OLR1	LINC01829	IL2RA	DPYSL3	LINC02773	S100A12	CHRM4	AC239799.2	STRA6	AC017002.6	GLOD4	MATN4	KCNQ2	CHAC1	VAMP5	NKD1	AC044810.2	ITGA2	TCEAL2	ANLN	METTL27	TNFRSF18	IER5	CIITA	LINC01356	XBP1	PNOC	AKR1C2	TUBB6	CAB39L	TESC	AL358777.1	CYP4F2	LINC01705	RPL11	ALOX12B	PTMA	CCL17	AC136616.1	IGKV1-8	H2AFX
47	CSRP2	IL36A	BACE2	PRELID1	DRD2	SESN3	SLC7A9	MIR9-3HG	ISL1	AL157834.1	HOXB8	LINC01332	PRSS22	HPCAL1	UPK1A	WDR54	LINC01389	RAB11FIP2	SPATS1	AC092718.6	C18orf25	AL390718.1	IGF1	LILRA2	GSTP1	KCNJ5	ARHGAP11A	AC009283.1	P2RY8	CCNL1	AL359894.1	TGM2	SLC25A1	PIK3CD-AS2	CAPN9	PLIN3	AC113208.5	FXYD4	MPZL2	SULT1A2	CXCL1	RPL7A	LHX6	NPM1	AC004816.1	LINC00221	IGLC1	RECQL4
48	DSC3	BPGM	CES2	NDUFB9	PGLYRP2	WNT4	SLC39A5	C14orf132	TAAR1	AL355881.1	PRUNE2	PTPRT	HSPB8	LINC01238	CERCAM	APCDD1L-DT	MCPH1-AS1	IDH2	AC107067.1	TACR2	SASH1	AL139351.3	TUSC3	ADAMTS3	CEACAM1	SYT4	RACGAP1	DNLZ	RGCC	BTG1	EYA2	AC020914.1	CALB2	CCR1	RAB27A	SPRR2D	CITED2	CTSF	GJB2	LINC02404	TMPRSS11A	RPL18	CHST7	PRDX1	LYPD2	AL118522.1	WAS	RRM1
49	KLF8	GPRC5A	C3orf67	CCDC85B	FCRL2	HLF	SLC6A19	TENM3	SEZ6L	BTK	NOVA1	CORO2B	AIF1L	REP15	EDNRB	LAMC2	AC116351.2	FUT1	AC124242.3	NOD2	SERTAD2	IFNL2	NTRK2	BIRC7	S100A6	HIC1	TUBB4B	PVT1	DDIT4	KDM6B	AC097369.2	POMC	KIAA1549L	PDGFRL	MLPH	TINF2	NDRG2	PTPRZ1	SNTG2	ERICH4	PF4V1	RPL5	RDH12	HSP90AB1	CSTB	AC073878.1	PIK3CD-AS2	EXO1
50	KCNK7	SLURP2	HSPG2	SNHG15	DCX	GJA1	ACE2	PLAC1	ARX	ADAP2	VTN	AL096706.1	MAL	KIF19	SOX18	HIST1H2BK	HLA-F-AS1	IGFBP2	AC022272.1	GLIPR1	TRIP10	SAMD9L	CADM1	PSG5	FTH1	FGFR1	CKAP5	TMEM176B	AEBP1	EGR3	PROCR	ZBED2	RANBP1	IL21R	SLC9A1	LINC02448	PDZD2	SBSPON	SERPINB3	SLC28A1	DUOX2	RACK1	DMKN	GPI	TMEM40	MAGEA10	AL031847.1	TMPO
51	ZNF750	KLK5	ARL6IP5	RPS27A	C19orf81	TP73	MGST3	GRAMD2A	DUSP26	PILRA	LINC01608	C12orf74	LINC02028	DLL1	SPDYC	PLAAT3	KLF11	SH3GL2	ZMAT4	AC148477.4	GNA15	ODF3B	TRAV41	TWIST1	ANXA2	NNMT	SAPCD2	ATP6AP2	TMEM156	SERTAD1	TCEA3	NLRP7	TAF1D	C3AR1	RAB27B	RBMS1	ABCA1	REG3A	SAMD9	GPA33	TACSTD2	RPL13A	TMEM45A	PAICS	CGNL1	FAM178B	AC004687.1	BRCA1
52	PTN	TOB1	RTL1	NOX1	AC016074.2	PRNP	VIL1	SERPINB9	SCGB2A1	FCGR1A	PGM5	AL136140.1	CXCL8	CRACR2A	CARMIL2	CTSZ	TRAV13-2	ETNPPL	INSRR	UBD	PLEKHF1	OAS3	FGF19	SLC2A3	ARHGEF18	GNAO1	HJURP	CDK6	MYL2	TNFAIP3	CTSH	TCF15	TCEA1	CABCOCO1	CTNNBL1	VSIG10L	MARCO	SLC1A2	ATP6V0A4	SLC6A19	AL355482.1	RPS12	KEL	HSPD1	C5orf66-AS1	PLTP	ESR2	MCM4
53	ANXA8	LINC01344	RHOC	ATP5F1D	DERL3	DSC3	SULT1B1	PALM2-AKAP2	KCNJ6	CCDC160	ENO3	SGCG	ARHGAP10	C12orf57	WASHC1	FLNA	ARLNC1	CKMT2	KCNJ8	TSNARE1	LMO2	PPM1J	SLC22A31	SYDE1	SLC52A3	PTPRD-AS1	CKAP2L	AC011313.1	ITGA8	TRIB1	ADRA2A	VIT	TNFRSF11B	TPST2	REP15	PP2D1	RAB9A	CREB3L4	VAMP5	CYP1A1	PXDN	RPS4X	NAALAD2	UQCR10	CPA4	NLGN4X	SPESP1	FAM111B
54	RAET1G	RALGDS	PDLIM2	C19orf48	AL035530.2	AL023754.1	PDZK1	SLC12A3	CPLX2	TMEM213	ETV1	C12orf77	CLIC3	SLC50A1	SEMA3D	CMTM6	POLD4	ADGRD1	RADIL	TST	RASAL2	IFIH1	AL359504.2	EFNA1	STK17A	MMRN1	KIF4A	LINC02527	IGKV2D-24	NFKBIZ	HLA-B	MFAP5	FUT4	RNF150	FXYD3	F3	AL355512.1	MIA	AC133919.2	ALDOC	LEMD1	RPL36	HOXA7	OSTC	CCNG2	PIGT	CCR10	E2F8
55	FAM83C	APOBEC3B	CD59	YIF1A	C4B	NTRK2	TMEM256	PSG7	KCNMA1	EVI2A	ANK2	PSTPIP2	SPRR1B	SH3BGRL3	FGF13	ITGB1	HEIH	ESRRB	KIF1A	KCTD17	DKK1	PML	FGF3	COL1A2	IRF1	DIRAS2	CDCA2	AC012366.1	CD79A	ARL14	HMCN2	FBLN2	PRODH	SRGN	UPK1B	ATP6V0A4	FOXC1	SLC12A2	TMPRSS11A	FABP2	PDZK1IP1	RPL22	C10orf99	TKT	GRHL1	AC107419.1	IGFLR1	KIF11
56	SUSD4	AVPI1	MUC17	SRM	FCRL5	MRC2	AC007877.1	PSG4	SMIM41	A2M	SV2B	PLCB2	NOXO1	CDC42EP5	MYBPHL	COL6A2	APOBEC3B	CLCNKA	AZGP1	SET	IL1RN	CMPK2	PPP2R2C	DCAF12L2	TNFRSF6B	RTL5	TNFAIP8L1	CSAG3	TGFB1	ERRFI1	SELENOM	TSPY1	SFTA2	CGA	RASSF6	SLURP2	TSPAN6	COLCA1	SBSN	TM4SF5	TRIM17	RPS25	GJB2	PGK1	ZNF365	OSER1	CHST15	TCF19
57	HSPB1	TUBB6	PLEC	SNRPB	IL10RA	BNC1	MALRD1	LINC00370	PCSK1	LINC02125	LINC01014	AC007952.4	CHAC1	GNE	PTPRG-AS1	CGB7	NR1D1	AC008268.1	ECE2	NOS2	PPL	AC090912.2	CTNNA2	AC061975.4	LINC02582	APLP1	GPSM2	NEIL2	WIPF1	DNAJB4	ASPHD1	HEG1	PES1	FAM163A	PKIB	ST3GAL4	HEPHL1	COLGALT2	ARRDC4	GLTPD2	LCN2	EEF1A1	AC125611.3	NDUFB8	EPS8L1	BCAS4	ZXDB	CENPU
58	WNT5A-AS1	TP53BP2	SPINT2	PPP1R14B	PCSK1N	RNF165	REEP6	LINC02724	AC008808.2	SRGN	BCAM	LINC01248	KLK6	SCGB1C2	AC100793.2	LAMA4	OSER1	PDGFD	NPW	CARD16	MXD1	APOL2	TNFRSF19	TMEM252-DT	KRT7	ARC	KIF11	FDFT1	TENT5C	ZFAND2A	CD47	CALD1	TMEM176A	TTC23L	EFHD2	CUL4A	KYNU	HPN	RHCG	FBXO2	C15orf48	RPS19	KRT6A	SHMT2	A2ML1	AC093515.1	FGF20	FBXO5
59	FRMD6	HES4	MYL12B	TXN	AP000553.2	SULF1	C2orf88	AL596211.1	GRPR	KCNK2	HES6	AC016168.2	SPRR2E	URAD	LINC01146	FAM216A	CENPM	CPM	VSTM2L	NOLC1	SPNS2	H1F0	AC009139.1	TFPI2	AHNAK2	SERPINA6	SGO2	ANKIB1	FCRL5	HEXIM1	MYL9	CHI3L2	CCDC190	Z93930.3	SYTL5	PLK3	KLK7	SERPINA1	KRT24	AQP11	HES2	RPL38	AC129926.1	RBX1	EMP1	AC004949.1	ARMCX2	NSD2
60	NSG1	KRT17	HTR2B	REG1B	IGHV3-21	DST	PEPD	AC005703.4	AC097625.1	TREM1	OPRD1	CHAD	LINC02395	KLK15	EVX1	UBASH3B	HECW2	CYFIP2	ALDH1A1	RAB11FIP1	SPRR2F	LAMC1-AS1	PON3	AC002480.1	STAT1	SRRM4	TTK	AL121974.1	AC008105.3	NR4A2	CMTM7	MXRA7	DAB2	AC004825.2	B3GNT6	CXCL8	HIST1H1C	CD74	SRD5A3-AS1	FAM13A	HEG1	RPL27A	AC019080.4	NDUFC1	H3F3B	AC002351.1	LOH12CR2	CDT1
61	ENDOU	ECHDC3	B2M	RPL12	SASH3	CCDC3	RGS2	AC007014.2	CRYGD	LRRC25	NOL4	KIT	TMEM173	AC009432.2	ERVMER61-1	EVA1B	TCERG1L	SLC2A12	MTUS2	SNHG6	RNF222	TAP1	ATP6AP2	IGFL1	CAPG	DSCAML1	ARL6IP1	NEUROG3	SFMBT2	CBX4	PBXIP1	OLFML3	LINC01300	FAM13C	PAQR8	TMPRSS11E	SPDYE9P	KCNK2	KLK12	TMEM220	TGM2	RPLP1	ABCA13	HNRNPA1	H2AFJ	AC010197.1	IL16	KIFC1
62	ZNF385A	DUSP5	ACAA2	REEP5	PNOC	CARD17	CDHR5	AL139002.1	TUBA1A	IFI30	ELOVL2	AC117500.6	PITX1	HOXB13	BX276092.9	TSPAN4	AL590617.2	TFR2	LRRTM4	CCL20	PRSS27	RIPK3	SYNPR	GAGE2A	UBR4	ATRNL1	PHF19	AP002852.1	TRGV5	ETS2	LY6E	DACT2	LMTK3	CPE	SPATS2L	SEPTIN9-DT	HSPB8	TFF2	AL592430.2	SLC5A1	SAT1	RPS13	DLX5	ANXA5	TNFSF11	AL157886.1	CYTH4	RAD54L
63	FAT2	PMAIP1	ITGB4	NOP56	AC079949.1	CCN1	CMBL	C1orf105	SVOP	PLA2G7	RIMBP2	ITPRID1	ANXA1	SNHG18	AL139002.1	FOXS1	AL590550.1	GPC3	SMOC1	SMIM3	STEAP4	IFITM3	CHL1	GATA3	ALPG	HELT	SPAG5	TEX13C	AC120193.1	HSP90AA1	AC025154.2	ACKR2	COMT	LINC02384	FSIP2	LINC01269	HIF1A-AS3	GNMT	TGM5	MUC17	TPM4	RPL31	RAB38	BCCIP	NDRG2	AC107886.1	FAM30A	DNMT1
64	JUP	LINC02026	CD63	POLD2	RADX	CSRP2	SLC2A2	PSG2	GPR142	PDE6G	RIMS2	ZNF804B	CITED2	AC006207.1	AC087857.1	TBCB	LINC00967	AC069228.1	MARCH11	TMSB10	CLDN17	IFI16	APCDD1	GJC1	PSMB8	AC008808.1	TACC3	GPR161	DNAAF1	ITPKC	UPK1A	IGF2	NMB	TXNDC5	SPTSSB	TPRG1	CSNK1E	HOMER2	VSIG10L	TREH	KRT16	RPL37A	ALDH3B2	NUDC	TPD52L2	IZUMO3	ITM2A	NCAPG
65	GRHL3	TMPRSS11E	AC009133.1	RPS23	IL21R	GEM	MME	GATA3	MRLN	FCGR2A	GRIN2C	GABRA4	C6orf132	CHRNA5	TBX18	CHST11	AC138207.4	AL158847.1	GALNT16	SOD2	PPP1R3C	SLC15A3	SMOC2	AL161431.1	SELENOS	PTCHD4	BUB1B	TMEM74B	IGF1	OVOL1	PYCR2	THSD7A	S100A13	IGHG3	ABCC5	CYSRT1	ADGRF1	SERTAD4-AS1	CERS3	SLC30A10	AL021328.1	RPS26	PERM1	SEC13	SPRR5	CTXND1	XBP1	HIST1H2AJ
66	LINC00958	ZFAND2A	GDPD3	LSM5	TMEM196	SCPEP1	MAOA	NEURL1	PLCXD3	AC123768.4	SLCO3A1	LRCH2	CYP27C1	CORO1A	PAK5	RSPO4	HIST1H4H	SMIM38	SYN1	CTNNB1	MGAT1	PCDHGA7	EMID1	HS3ST3A1	KRT18	LINC00261	KNL1	CXCL2	ARSB	CLDN4	CALHM2	SAA1	RERGL	LINC01934	SGSM3	AL354766.2	DEFB4B	HLA-DMA	NOD2	ACE	BCAP29	QTRT1	TENM2	ALDH2	LCE3E	LINC02055	IGLV1-40	RAD51AP1
67	CYP4B1	TIMP2	SERPINB6	POLR2I	XKR4	THBS2	SULT1E1	TGFBR3	PEMT	ARHGAP15	ARHGEF7	ADAMDEC1	RDH10	LINC01913	HOXA11-AS	PFN2	ATP6V1C1	AL162511.1	SEC14L6	HUNK	HIF1A-AS1	SERPING1	CES5A	SPARC	SH3BGRL3	SYT5	NCAPD2	TRIM31	AL355377.4	SOCS1	RILPL2	LGALS14	EIF3H	IGHG1	TSPAN1	SMILR	AL353653.1	FBP2	TGM1	ACY1	AC226101.1	RPL21	DSP	GNPNAT1	FTH1	TSPAN18	IGHV2OR16-5	UBE2T
68	PTGS1	RIOK3	S100A6	IDH3B	LINC00200	KRT5	TMEM253	RAB6C	AC055872.2	SDS	SERPINF1	PDE2A	SORCS2	DYRK4	CPVL	ADAM8	CCR5AS	SIK2	FBLN7	ASB4	HCG22	HAPLN3	RTL9	CEACAM21	RHOF	SLC22A17	HMGN2	PSORS1C2	NLGN2	LDLR	AC004130.2	SLC2A3	FOXL1	DUSP26	IFI27	MUC21	TEDDM1	FAM107B	SLC10A6	MUC13	TSPAN10	RPL10	LGALS7B	MRPL51	MT1E	DIPK1B	IGHV4-59	CDC6
69	GJB6	RND3	MUC20	RPLP2	AC109446.3	TSLP	ACAA1	ANKRD33B	BAIAP3	ST3GAL6-AS1	PEG10	OGDHL	SORBS2	NPDC1	CASC15	HMGA2	KLF15	HPN	KCNK3	MRPL50	TPRG1	IGFBP4	FSCN1	PALM2-AKAP2	IL32	SYT14	HP1BP3	GRID1	LINC02362	CCN1	LINGO1	SERPING1	MIF	AC069404.1	COL17A1	WTAP	SLC12A6	P3H3	TMPRSS11D	FADS6	PRRX2	SLC39A5	NSG1	TXNL4A	HES4	GAL	JCHAIN	MNS1
70	NECTIN1	EREG	LRP10	LSM7	LINC01353	CCL2	ABCG2	RASGRF1	RALYL	ACP5	NUPR1	AC106795.5	PRICKLE4	CREB3L1	GAD1	PCDHA12	ZFPM2-AS1	KCNJ16	CORIN	RGS12	NDUFA4L2	LAP3	RCN2	AC110619.1	CD55	RAPGEF4	TUBA1C	ELF3	CCDC39	PARD6G-AS1	SPINK1	DSCR4-IT1	BIK	FFAR3	SMIM14	AL391863.1	B4GALT1	SERPINA3	HS3ST1	LAMA1	GPCPD1	PFDN5	GBP6	MANF	AC006333.2	AC064875.1	MT1F	UHRF1
71	CALML5	LYPD2	EMX1	CD81	KCNA3	PLCD4	CDH17	AC124861.1	TMEM190	DOCK2	TNNT1	AC107896.1	HS3ST1	FAM3D	GRN	EIF4EBP1	AGPAT5	PXMP2	TPH1	SNHG5	S100A9	DYNLT1	ZIC4	NXNL2	ALPP	APBB1	CENPW	TMED10	MSMB	PLK3	AC104653.1	GLDC	FUOM	IGKV1D-16	PLXNB2	ITSN2	GK	SERPINA4	CSGALNACT1	TMPRSS15	TGFB1	RPS11	ANKRD35	DBI	LINC01820	FCHO1	LYZ	HIST1H2AB
72	RHCG	CAPN14	REEP3	EXOSC5	TAAR1	PKIA	SLC22A18	AC074281.2	GNG2	AP1S2	BEX4	AP002954.2	MAB21L4	TBX10	PCAT19	AC110597.3	LINC00882	ZNF385B	LZTS1	ASS1	PRICKLE4	RFPL1	SIX2	NOG	HIST1H2AC	AC093330.3	CDC25C	HTRA1	AC141424.1	EIF4A3	AC005162.1	AL161431.1	BID	AC010547.1	CACFD1	LINC02028	HEG1	SSR4	TNFSF10	MAF	CHI3L2	COX4I1	KCNK7	UBE2N	PADI1	CCDC34	LINC02362	HIST2H2AC
73	TENT5B	TSPAN6	DSG2	SNRPD2	SHC4	LTB4R2	FAM3C	AC015522.1	FAM13C	ITGAX	CGB2	DGKI	DEFB4A	PRPH2	TPM2	PGAM4	CDYL	HACD1	AC026774.1	EIF1AY	MAL	PSMB9	AC136475.2	B4GALNT1	MDFI	AC004832.1	KIF14	IRF2BP2	FAM92B	CDKN1C	DLGAP1-AS1	ATP1A4	ARHGAP4	AL133467.1	SMIM22	SPRR2A	ATP6V0A4	COL11A2	TGFA	PMP22	PYGL	RPL18A	FOXN1	HSP90AA1	VAV1	CPVL	IGLV1-50	GINS2
74	FOXN1	MB	CXCL16	RPS13	AC004540.2	EDNRA	OTOP3	AC013549.4	AL133343.2	TCF21	HOXB5	PLPP4	SPRR2A	TIGIT	MGMT	OLFML3	ALOXE3	CDH2	SRSF12	ITGA6	SH3BGRL2	AP005233.2	LINC01549	SH3GL3	WARS	C4A	NUCKS1	C11orf97	STAT4	NUFIP2	GSTM3	TDRD12	TMEM123	SLC6A17	GALNT5	EPHX3	AC073288.1	ZNF503	PEA15	IL32	AC073323.1	RPS28	KLC3	MRPL17	DUSP5	MAGEA6	SSR4	STMN1
75	AC008556.1	EHF	NQO1	FAM174C	C6orf58	KRT31	ADH4	LINC01162	TMPRSS6	PYGO1	RBM38	AC024022.1	VAV1	DNAJC10	SYNGR4	TWSG1	RBM20	CLCNKB	LINC00602	SAA1	AIF1L	FBXO6	GPR37	SAA1	OAS1	PGAM2	NCAPG	GUK1	AL035530.2	CLK1	BPIFB1	ADAMTSL4	TTYH3	GFRA1	SLC7A8	GNL3	ANXA9	FAM240C	EPHX3	CDKN2B-AS1	TEX101	RPS7	HLF	HSP90B1	LINC01983	GPR1-AS	MEF2B	HIST1H2BF
76	NOTCH3	ICAM1	SERINC2	FAU	FOXP3	IQCJ-SCHIP1	ANPEP	SLC1A3	NKX2-2	LAIR1	KCTD12	AC013565.1	RGS10	PTGDR2	RAB34	TEPP	LAMA4	ZNF710-AS1	CHRNB2	APBB2	CGNL1	GRIN3A	RCN1	ATP6V0A4	LGALS3	WNT4	TUBA1B	AC011287.2	SLAMF7	SNHG12	AC068774.1	BASP1	SCD	TRAT1	SLC44A4	IL36G	GRPEL2	ITM2A	DUOXA1	ABCG2	FSTL1	SNHG8	CYP4F22	SNU13	ZNF185	ORM1	DGCR6	HIST1H4D
77	ARHGAP23	SERPINB13	CD55	LAGE3	AC131011.1	WNT5A	TDP2	LINC01615	RGS4	LY96	PRR18	LIPG	ECHDC3	TTC39A	DYDC2	CAPG	HIST2H4B	MYO18B	RUNX1T1	VDAC2	MARCH5	SOCS1	EVA1A	AC008395.1	TAX1BP1	INHBA	SMC4	GTF3A	ZRANB2-AS2	MAFB	PDZK1IP1	NLRP2	ENY2	GSTM5	OSBPL7	LINC01503	DUOX2	PRSS54	GJB6	SLC3A1	OSMR	RPS21	GSTA4	NCL	MAP1LC3A	LIN28B	AC025154.2	PDPN
78	S100A14	KRT16	AC093817.2	NACA	GABRG2	BST2	C11orf86	SLC15A2	GP1BB	HTRA4	CMIP	PTPRC	SLC49A3	C3orf70	DNAH11	AC017002.6	ABCA13	CYB5R1	CDHR3	PLAUR	METRNL	CFH	FBXO17	GABARAPL1	AGTRAP	CNTN4	MAD2L1	NENF	PPP1R16B	AC023157.3	AC130456.2	MYCT1	COL17A1	TAAR1	AHNAK	SOWAHC	HIST3H2A	CIRBP	A2ML1	SLC2A5	SERPINB1	RPLP0	BCL11B	HNRNPA2B1	DIO2	ASGR2	SIK1	WDR34
79	BTBD11	CRADD	TMEM45B	COX6C	EMP3	ZNF331	LIPA	TFRC	BMERB1	MMP19	LINC01413	AC079447.1	GNA15	NXPE1	REC8	TFPI2	FBXO32	FGG	DOK6	HBA2	TMEM40	ZBP1	OTOG	HOXC13-AS	IFITM3	BTBD17	LMNB1	PIFO	TRG-AS1	PPP1R10	SIPA1	MAGEA4	S100A6	PAM	XAF1	MAB21L4	DEFB4A	GP2	RHD	NAALADL1	DKK4	CDX1	AC008897.3	CACYBP	KAZN	AC026320.1	CYP27B1	ORC6
80	DUOXA1	LRG1	AK1	RPL18	SLCO4C1	OLFM2	TTC36	TMEM52B	SPTBN4	COLEC12	BHLHE22	ANKRD20A2	AC243967.2	APOBR	NOTUM	VAT1	WDR81	HSPB7	SLC8A2	PUM3	MACO1	SEPTIN4	GPR50	EPOP	RAC1	SLC16A12	FOXM1	AL592043.1	MMRN1	UBB	AL353801.2	TIMP3	CEMIP	JSRP1	CEACAM5	PLAU	GSEC	DZIP1L	S100A7	SUSD2	SMILR	ALKBH7	KLHL13	RAN	ABLIM3	AL929288.1	IGHV1-18	BRCA2
81	MIR205HG	CYSRT1	EFHD2	KRTCAP2	ARMC4	FST	ANKRD40CL	ATP10A	ISLR2	LINC01331	LINC02500	LINC01170	SPRR2D	NXPE2	AC011287.1	CRTAP	GPSM1	BMPR1B	GRIA2	OSBPL5	PLAC8	TRAFD1	SLIT3	PNMA8A	SP100	MAP6	ARHGEF39	SUB1	GXYLT2	BCL3	SAA2	CAVIN1	GUK1	CLTRN	SYTL4	AIF1L	CLCA4	ST6GALNAC3	AC011483.2	MGAM	SWAP70	RPS15	AC007336.1	HNRNPF	MAB21L4	AC079384.1	PDK1	ANLN
82	ALOX15B	MAP3K4	XRCC4	MRPL4	AL133415.1	AC129507.1	SLC25A37	EDNRB	UCN3	GPR146	SGCE	C11orf53	ZNF426	ITM2C	CAMP	TDRD1	KLHL21	DOCK2	NPHS1	LINC01678	SNX9	MX2	SALL1	MAGEA4-AS1	UBD	NALCN	SPC25	AKR1C4	PIM2	ZFP36L1	ADCY5	EBI3	STEAP1	TMEM270	LINC00520	CD177	YPEL4	ENAH	IL36RN	MEP1A	POLB	RAMP1	PERP	ERH	IDI1	SULF2	CAHM	DDX11
83	MPZL2	DUSP14	HLA-A	RACK1	SYT14	GSDMC	AKR7A3	ZIM2	C5orf49	AC008752.2	FGF9	TNN	HEG1	DMPK	FAM189A1	RBP1	KCNK9	GUCA1C	AC006364.1	STK32C	SPRR1A	AC009119.1	TWIST1	CYP26A1	ITGB4	NR4A3	KIF18A	LINC02577	CD48	KLF2	C1R	CSF1R	ARPC1B	TOGARAM2	MTRNR2L12	NTHL1	MAPK10	LINC00261	PLAT	ACHE	SAA2	CDC42EP5	EDDM13	TUBA1B	EPHA2	AC022809.1	LY9	RFC2
84	SYNGR1	FAM89B	CTSB	RPL23A	SSR4	CDHR1	CREB3L3	PTGES	SSTR5	ITGB2	AMACR	AC064805.2	RAB31	CCDC60	LINC00665	LAMA3	CSAG2	SCPEP1	NTRK1	ARID5B	VASN	NEXN	SDC2	AL137001.2	DNAJB2	NKX2-2	MIS18BP1	CLDN4	IGKV1-16	KCNQ1OT1	TPM2	CT45A10	UBE2L3	AC055839.2	CYP3A5	LMO2	SMS	CDC42EP1	CYP27C1	SSUH2	CYP2A6	RPSA	SBSN	ENO1	HOPX	HS6ST2	AC139887.2	KIF22
85	NMU	AP002851.1	CTSE	EBNA1BP2	IGHGP	CX3CL1	UGT2B17	AC110619.1	SEPTIN5	CSF2RA	CBFA2T2	AC092979.1	KRT23	RAB15	RAMP2	DLGAP3	ROPN1B	AC108488.1	GDF7	ATP1B1	PSMC6	LY6E	CPB2	PROSER2	IFI35	ASGR1	RAD21	AC016723.1	ZAP70	CD55	VSIG2	PSG9	COTL1	AC004231.1	FAM102A	SH2D3A	DLL4	SCTR	AC007298.1	OTOP3	COX6B2	EEF2	NTRK2	HNRNPM	NAMPT	CT55	IGKV2-28	HIST1H4A
86	PITX1	HIST1H2BC	S100A16	RPS16	RPL34-AS1	CAVIN1	C3orf85	DUBR	PBX3	HCG9	SCN3A	TRBVB	GABRP	CYP2A7	OSR2	FCER2	IGF2R	TPD52L1	AL451080.1	EIF3A	AP001610.3	SPATS2L	HOXD10	AC116025.2	S100A11	LINC02532	PRR11	KCNMB2-AS1	IGKV1-8	RASD1	SLC27A1	COL4A2	DESI1	COL24A1	B3GALT5	FAM83A	A4GALT	SCUBE2	NCOA7	SMLR1	CDH3	EIF3L	PTPRZ1	MRPS34	LINC02487	CTSF	AC010997.5	EZH2
87	DSC2	LINC01705	TAX1BP3	PSMA2	AC073475.1	FZD10	SCP2	KCNH5	GPC6	AL138995.1	USP41	AC021860.1	AC100791.1	BCAS1	AC022182.1	PSENEN	TXNIP	SEPTIN6	CAVIN3	BUB3	ZNF92	TNS4	TGFB2-AS1	SLIT2	PINK1	PBXIP1	CCNF	ZDHHC24	CLCA4-AS1	RSRP1	ARMCX6	TFPI2	CHCHD10	SCGB2A1	CYSTM1	SRPX2	HHIPL1	PLTP	SH3PXD2B	MTTP	FAM20C	RPL6	CLEC2B	SRPRB	RBPMS-AS1	LINC02335	GMFG	BARD1
88	CXCR2	HSPB8	LINC01559	RPS8	FBLN7	COL17A1	MOGAT3	OPRK1	SAMD11	TREM2	ADGRD1-AS1	CLEC17A	LINC01269	SMIM33	C3orf14	DKK3	LINC00346	PLCXD3	CERS4	SLC28A3	WWTR1	CFB	LKAAEAR1	AL353689.2	IFIH1	CAMK2B	IQGAP3	NDUFC2	LINC02688	TUBB2A	MUC20	CHRD	SELENOH	TMEM130	RAB37	ALOX15B	MARCKS	AC011389.2	S100A12	AQP7	LINC01605	GSTK1	ELAC2	NME2	CYTOR	POU6F2-AS1	VIM	HIST1H2AE
89	UGT1A7	PORCN	ARPC1B	RPL11	TENT5C	IFFO2	SMLR1	NLGN4Y	LINC00290	FZD2	TMEM255B	MELTF	AC111149.2	ATP2C2	ZFPM2-AS1	STAC	LBX2-AS1	GABARAPL1	MMP16	PSAT1	LNX1	MSRB1	LHX1	GJA4	NUDT14	SERPINA10	NCAPH	CCL20	THEMIS2	THUMPD3-AS1	F5	GATA3	LINC02300	SLAMF6	TRANK1	AC003965.2	LPIN1	LARGE2	KLK8	MYO15B	FAM83D	IMPDH2	AC124852.1	GINS2	AL139393.2	LINC00383	GSTM2	BRIP1
90	GJB2	EVC2	ITGB1	RPL41	SLAMF7	PTPN13	DHRS1	LINC00379	TPST2	FYB1	CDKN2C	ALKBH3-AS1	UPK3B	AP006565.1	SPEG	LINC01638	FP325318.1	MPC1	SLC8A3	AC069120.1	NDFIP2	IRF7	LINC02223	TPTE	SNX8	PLEKHO1	BUB3	AMACR	LINC02166	SGK1	TMSB4X	CORO6	UQCR10	CCR10	MMP28	CCL20	TTC22	TMED6	AL354766.2	SLC6A8	TNFRSF6B	ZFAS1	ATP1B3	CYSTM1	SRPX2	HTRA1	DLGAP1-AS5	HJURP
91	PDLIM4	YOD1	CYBA	DCXR	TCEAL2	MCC	APOBEC1	ZNF257	DTNA	AC137630.2	BEST3	AC007906.2	NIBAN2	CHST5	TGFBR3L	C11orf72	TPP1	AC096576.6	EBF1	TASOR2	GRPEL2-AS1	LAMP3	AC026336.3	SLC6A15	YKT6	MAP2	INCENP	C6orf226	AOC2	NEAT1	LRRTM1	LINC01194	TRPS1	TMEM204	GALNT7	PTPN13	AL353803.2	C12orf57	AC008114.1	ANKRD9	CEACAM1	DMBT1	AL121917.1	SRSF3	TGM3	CSAG3	ANKRD28	PBK
92	CYP4F22	ZNF426	ANXA13	RPL39	CSDC2	RGMA	GLRX	LINC00708	SCGB1D1	GIMAP5	TOX	CCSER1	KRT24	TOX	ISYNA1	SERPINE2	ZNF341-AS1	DUSP4	IFI6	CDX1	EPHX3	ETV7	AP000431.1	GATA3-AS1	IFI27	DEPP1	ECT2	MRGPRG	TSC22D3	MYADM	RNASET2	MAGEB1	EPN1	CHRNB2	LINC00365	DAPP1	JMY	NR2F2	AL021026.1	S100G	RAB42	C12orf57	HOXC13	HNRNPAB	PPDPF	FKBP10	AL139220.2	POLQ
93	DSG1-AS1	B3GNT6	RHOF	LSM4	AC002511.2	ARL4D	EPB41L3	AC103996.3	LHFPL3	CTSZ	MTMR7	LINC01331	IL36RN	ITLN2	KRTAP3-3	BEX3	ZNF727	TMED6	BSN	FGFRL1	C6orf132	LIF	PON2	DPPA2	SEC61B	CPE	SGO1	AC099517.1	GABRB1	ID2	RPS27	AC063944.1	SNU13	CNIH2	PLCXD1	CEACAM7	CCDC69	GPRC5C	CXCL6	MYO7B	GRAMD2B	SNHG5	PLA2G3	MCM5	SAT1	LRRD1	PALMD	DIAPH3
94	IL20RB	SLCO4A1	PCDH1	TMEM179B	VNN2	NCS1	ADIRF	LINC02201	DPP6	KRT36	DNAJC6	NRGN	FSTL1	SMIM31	ROBO2	THBS1	CBLL1	LDHB	SLC26A4-AS1	CYB5B	ITPRIP	AC010680.2	AL445985.1	NOCT	KRT8	STXBP5L	OIP5	MAGEB5	ITGA4	PFKFB3	AC015712.1	CDH19	STUB1	SCG5	CCDC68	SPINK7	RAB42	STK32B	TPRG1	CD68	SPINT1	NACA	LINC02803	PPIB	ARHGAP10	SALL4	AC087289.5	DSCC1
95	FO681492.1	PLSCR1	RRAS	MRPS17	RGS4	SMO	SULT1A2	AC092943.2	ST8SIA5	KCNJ5	EPHA7	ELFN2	MYLK4	IFI27L2	MATN2	ITGB6	LINC01260	EGR2	DPP6	VSNL1	A2ML1	LINC02701	LINC01116	SERPINB9	HES4	SEPTIN5	PIMREG	ERICH3	CHST2	IER5L	CCL28	AP001596.1	ZYX	PAIP2B	FMN1	SPRR3	SNX18	CHRM3	LRG1	DPP4	CTSB	RPL30	MYCBP2	HNRNPK	SCEL	AL606500.1	IGKV2-4	MCM3
96	AL159158.1	P2RY1	PYCARD	UQCR11	LY96	LAMP3	GDA	AL138885.2	LINC00907	AC009948.2	NEB	OBP2A	C15orf62	AC108482.1	ARF3	TUBB	AC244102.4	FGD4	CLDN10	PTCH1	ABHD5	CTSS	KREMEN1	PSG3	EGFR	MAMLD1	H2AFX	CEBPD	C6orf15	ELF3	GATM	HSD17B1	HDHD5	FAM92B	CCL28	B4GALT1	PLAT	ACSM5	MBOAT2	TM6SF2	TMPRSS2	RPL28	DLX3	AKR1B10	MAPK8	AC244102.4	MYCN	MCM10
97	CSTA	B3GNT5	MFGE8	ASCL2	TNFRSF13C	CALD1	CYP27A1	AC093890.2	AC069404.1	RNASE6	MMP9	AC110285.4	KAZN	TMEM210	LIMD2	ISYNA1	AP5Z1	AC022424.2	SLC7A2	STAT1	LINC02621	AL450344.3	FLT4	LYNX1	AL162582.1	UNC80	PBK	GNG10	FKBP11	CHORDC1	RFX5	SAP25	EIF4EBP1	CD3D	CREB3L1	TMPRSS11B	RBMS2	NFIC	KRT7-AS	B3GNT8	VAMP5	TPT1	CERS3	PSMA3	ZNF426	FLRT3	OLFM4	NCAPD3
98	TMEM79	IL4R	CD82	KRTCAP3	TMEM156	NR4A2	LGALS4	LAMC1	C1QL1	SLC40A1	AKT3	GFI1B	AL049552.2	CBFA2T3	CPA6	BMP6	LCN2	RPRM	PDE10A	SLC12A2	KIFC3	MCUB	AC096645.1	CLIC4	HSPA5	Z84468.2	DEPDC1B	MCUR1	AC007384.1	ZC3HAV1	ADAM15	ARHGAP29	CCDC85B	TNFRSF13B	MYRF	RAET1L	SAT1	GPT2	ADGRF1	RAB30	SORCS2	RPL23A	SCUBE3	APEH	CCDC69	AC010601.1	TET1	POLA2
99	DYNAP	AL132857.1	CYSTM1	PRDX4	GYPC	MPPED2	AADAC	AC022150.4	ECRG4	AL592183.1	SYT2	LRRN2	KLK7	PROZ	CCND2	MSN	AC100802.1	NCAM1	PTPRN	TPGS1	MAB21L4	PCDHB7	IGFBP5	AC011632.1	CCL15	SCG3	DBF4	SPESP1	CCDC160	PIK3R3	HLA-C	RIPOR2	ARPC1A	MAGI2-AS3	SPINK1	AC008149.1	TMEM86A	CYP4X1	P2RY6	GLRX	ELOVL4	ATP5MC2	AL356019.2	LSM3	USP6NL	SERPING1	TUSC8	DNAJC9

## Sheet: Epithelial_F2
	pEpi1_FU2 (shared, B)	pEpi2_FU2 (unique)	pEpi3_FU2 (shared)	contaminant	pEpi5_FU2 (shared, adhesion, CD9, RHOC)	pEpi6_FU2 (shared, parietal: ATP4A, ATP4B)	pEpi7_FU2 (unique)	pEpi8_FU2 (shared, histone)	pEpi9_FU2 (shared, B)	contaminant	pEpi11_FU2 (unique, MED1)	pEpi12_FU2 (shared, FU1)	pEpi13_FU2 (shared, gastric mucosal)	pEpi14_FU2 (unique)	contaminant	pEpi16_FU2 (shared)	pEpi17_FU2 (shared, chief: PGA3-5)	pEpi18_FU2 (shared, enteroendocrine)	contaminant	pEpi20_FU2 (unique)	pEpi21_FU2 (unique)	contaminant	pEpi23_FU2 (unique)	pEpi24_FU2 (shared)	pEpi25_FU2 (shared, squamoid: KRT13, KRT4)	pEpi26_FU2 (shared, proliferation)	pEpi27_FU2 (unique)	pEpi28_FU2 (shared, metaplasia: TFF1, MUC5AC)	pEpi29_FU2 (shared, NFkB)	pEpi30_FU2 (shared, enteroendocrine)	pEpi31_FU2 (shared, FU1: FAP, MUC2, TFF3)	pEpi32_FU2 (unique)	pEpi33_FU2 (unique)	pEpi34_FU2 (shared)	pEpi35_FU2 (shared, parietal)	pEpi36_FU2 (unique)	pEpi37_FU2 (shared)	pEpi38_FU2 (shared, B)	pEpi39_FU2 (unique)	pEpi40_FU2 (shared)	pEpi41_FU2 (shared, ISG)	pEpi42_FU2 (unique, histone)	pEpi43_FU2 (shared)	pEpi44_FU2 (unique)	pEpi45_FU2 (shared, FU1: NME1)	pEpi46_FU2 (shared, normal)	pEpi47_FU2 (unique: KRT31, FGF3)	pEpi48_FU2 (shared, mesenchymal, ANKRD2, IL6)
0	HBD	HSPB2	RBP2	C22orf42	FERMT1	CBLIF	C20orf204	PKMYT1	JUP	IGLV3-27	MED1	BMX	LINC02688	PSORS1C2	IGKV2D-40	IGFBP3	PGA3	HDC	HTN3	AFP	ADAM18	AC009292.2	PAX4	SNHG7	KRT13	CCNB1	FLNC	GKN2	HSPA1B	GC	FAP	SERPINA3	AC004817.3	APOA1	LINC02410	SKIL	PEG3	STEAP4	RELN	CA1	WARS	HIST1H2BK	AC005550.2	CA7	C1QBP	RPS4Y1	KRT31	ANKRD2
1	ALAS2	ADGB	CCL25	CALY	CD9	TRIM50	SNCAIP	ATAD2	KRT23	AL031733.2	KANSL1-AS1	HTR3E	MUC6	S100A3	NAV2-IT1	BIRC7	PGA5	SLC18A2	AC079949.3	TTR	MAGEC2	AC233755.2	ENPP2	RPS5	TMPRSS11D	CENPF	AC010894.4	GKN1	DNAJB1	FEV	C1QL2	SERPINA1	KRT84	APOC3	ADAM21	ODAM	PTN	CEMIP	CLEC3A	KRT20	GBP4	HIST1H1C	KIF26A	BEST4	NME1	RPL32	AC069410.1	MFAP5
2	AHSP	CRYAB	SLC51B	PCSK2	LAMC2	ATP4A	AGT	RRM2	APOD	IGHV3OR16-15	KANSL1	LRMP	C16orf89	KRT38	IGKV2-40	PLIN2	PGA4	ACSL1	TRBV19	VTN	AC114485.1	IGKV3-20	NEUROG3	REG1A	CRNN	CDC20	PSG4	MUCL3	EGR1	CHGA	CCDC83	PDLIM4	SAA2	AQP10	AP000844.2	GPR160	LRP2	SPRR1B	AP000238.1	FABP1	GBP1	HIST1H3G	SULT1B1	GUCA2A	NPM1	ADH1C	FGF3	IL6
3	IFIT1B	RNF187	KHK	SORCS1	ACTB	CPA2	SULT1C4	MCM7	UBE2R2	IGHV3-66	MIEN1	SH2D6	FMOD	AC132217.2	IGHV4-39	FSTL3	LIPF	LHX5-AS1	CLEC2A	SERPINC1	MAGEB16	IGHV3-20	HEPACAM2	RPLP0	IL36A	PLK1	AL137026.3	PSCA	PPP1R15A	ADH1B	GAU1	DUOXA2	AC008760.2	ENPP7	CCDC172	LEFTY1	MIR205HG	C15orf48	AC018685.2	PHGR1	CXCL11	HIST1H2BJ	ACAA2	ADGRG4	HSPD1	RPL29	PRR9	SBSPON
4	HEMGN	ACTC1	CLDN15	RNF150	ANXA2	ATP4B	FAM162B	HIST1H4C	KRT10	CORO1A	AC009283.1	HCK	AQP5	LRRC15	IGHG1	BNIP3	MT1F	CAMK2B	FOXP3	AP002754.2	AL157778.1	IGHV3-43	INSM1	RPS19	KRT4	TPX2	LINC02697	TFF1	HSPA1A	C7	KRT40	WFDC2	SAA1	SLC15A1	AL357146.1	CCND2	OPRK1	SPRR1A	AC007493.1	TMPRSS15	IDO1	HIST1H4H	XIST	OTOP2	RAN	RGS5	TRH	HEG1
5	EPB42	XAGE3	HEBP1	GAST	S100A16	SLC16A7	HOXD11	HELLS	PSMD3	CD27	ERBB2	GNAT3	CLDN2	VSIG8	IGHG4	HILPDA	MT1M	KCNK3	LIX1	LGALS14	AC109635.7	IGHA1	ST18	RPS18	SPRR2B	NUSAP1	DMRT1	MUC5AC	FOSB	C8G	CALML5	LCN2	IL17C	APOA4	AC078950.1	GDF15	ERVH48-1	DSG3	C1QTNF3	SLC28A2	CXCL10	SNRPD1	AADAC	SPIB	NDUFAB1	RPL26	LY6G6D	PSG3
6	HBB	FOXE3	C17orf78	CPA5	TM4SF1	KCNE2	OLFML3	ASF1B	SMARCE1	CCR10	PGAP3	TRPM5	C6orf58	AIRE	IGKC	LEP	GPER1	GHRL	HOXD8	GDF1	AC064869.1	TNFRSF17	GPRC6A	RPL6	AC133485.2	ASPM	AL138828.1	RNASE1	HSPH1	PAPPA2	AC069549.1	PRSS2	IL1RAPL1	APOB	POU6F2-AS1	TRIB1	ATP6V1C2	MUC20	RSPO3	MALL	IL18BP	HIST2H2AA4	HMGCS2	GUCA2B	EIF4A1	RPL34	NELL2	ALPP
7	HBA1	LIN28A	ERICH4	RGS4	FLNB	GPR155	NES	TYMS	PRSS3	MZB1	AC015712.7	HPGDS	A4GNT	CHI3L1	IGHV4-59	LY6K	MT1G	FGF14	LINC01549	GPR158-AS1	TKTL1	ASIC5	RIMBP2	EEF1G	HCG22	UBE2C	AL137078.1	LGALS9B	JUN	TPH1	AL021920.3	LY6D	SLC26A4	ALPI	LINC00671	CEL	BCAT1	FAM25A	STRA6	ANPEP	IL32	CRABP1	METRN	CORIN	CYCS	RPS15A	MUCL1	PTGES
8	SNCA	HAND1	DPEP1	HAP1	SH3BGRL3	MFSD4A	HOXD13	TK1	NT5C3B	TMEM156	ARL17A	HTR3C	LYZ	SBSN	IGHV4-55	SERPINE1	CHIA	SRRM4	NKD1	PLG	CTCFL	IGHV3-23	OR51E1	RPLP1	KRT78	KPNA2	CD300E	S100P	BAG3	MYH8	MUC2	CP	AHSG	CYP3A4	AC116407.1	KLF10	FADS1	AC090192.2	PCP4	HPGD	ISG15	HIST1H2AE	AKR1B10	CFTR	CCT6A	ALDH3A1	GPR83	OLR1
9	SLC4A1	MAGEA1	DMBT1	EGR4	JPT1	IGFBP5	FBLN2	CLSPN	PPP1R1B	LINC00877	ARL17B	RGS13	CLU	MT4	LINC00582	NOG	LEPR	MBOAT4	CTLA4	F2	GTSF1	JCHAIN	KCNB2	DDRGK1	SPRR2D	PTTG1	AC079411.1	NKX6-2	ATF3	SCGN	AC068544.2	REG3A	SELE	SLC6A19	ITIH5	SMOC2	DPPA3	TM4SF1	NOTUM	GPA33	STAT1	AL451070.1	MSLN	GFI1B	CCT2	TESC	CD36	CALHM3
10	HBG1	HIST3H2A	FABP2	PCSK1N	ISG20	SLC25A4	ST8SIA6-AS1	PCNA	THRA	IGHV3-7	AC011824.1	AVIL	CTSF	KRT86	PNOC	COL12A1	PGC	GFRA3	APCDD1	DIO1	FABP7	RGS1	CADPS	ZFAS1	TMPRSS11B	MKI67	AC015922.2	UPK1B	ZFP36	DIRAS3	AF127577.3	BPIFB1	ATP12A	MEP1B	AL162511.1	PRKCI	SYCE1	SOD2	SP9	LINC02404	TAP1	HIST1H2BC	C4orf48	BDNF	EIF5A	RPS24	AL159156.1	PSG5
11	HBM	MYL9	CBR1	CASR	RHOC	APOBEC2	TGFBI	HIST1H1B	GRB7	VIM	STARD3	SH2D7	PGC	CST2	PECAM1	INHA	MT1E	SSTR2	MYH7B	APOA2	DLGAP1-AS3	IGLJ1	PRUNE2	RPL18A	SPRR2E	CENPA	MAG	PLAAT2	IER2	SCG2	PRAC1	MMP1	AC008063.2	SLC28A1	HSPB7	GEM	SLC12A3	CEACAM1	LINC01481	ADH4	TYMP	HIST1H2AC	RAB27B	NEURL1	PPIA	HLA-DMA	BSX	GJA5
12	HBA2	EZHIP	NLRP6	LY6H	CD59	FGA	VCAN	PCLAF	CASC3	LSP1	CPS1	GNG13	PRR4	CST1	MZB1	SOX15	MT2A	CFC1	EMX2	AC026355.2	LINC01193	IGHV3-16	THEG	RPL10	KRT24	KIF20A	AC010183.1	BCAS1	ZFAND2A	TGFB1	PLPPR1	DUOX2	ACKR3	ACY3	TDRG1	NR4A3	CFAP300	STRIP2	LINC02470	SI	UBD	RBBP8	PLA2G10	CEACAM3	ATP5F1B	CD74	COX4I2	CALD1
13	GYPC	MSX1	NR1H4	CPE	S100A11	CLIC6	OBSCN	CDT1	GSDMB	IGLC2	AL109920.1	AC016168.2	LTF	MYL3	PIM2	AC134312.1	PDILT	SYT4	PTPRC	LINC00578	LINC01419	FCRL5	SLC38A11	TMEM176A	A2ML1	HMMR	Z97192.2	PSAPL1	JUNB	FBN1	SPINK4	PDZK1IP1	C3	SLC52A1	FNDC5	ERRFI1	KANK4	PRDM1	USP41	MEP1A	EPSTI1	HES4	TST	EDN3	PTGES3	RPS28	AC093523.1	SCHIP1
14	HBG2	EFHD1	SLC51A	PTPRN	KRT7	G0S2	PTP4A3	CENPM	QPRT	TNFRSF13B	PRSS21	TAS1R3	ZG16B	LY6G6D	BEND4	EFNA1	TMED6	KIRREL2	AC023825.2	CUBN	AC131094.1	CD79A	OTULINL	RPL8	CALML3	DLGAP5	AC005808.1	LGALS9C	IER3	F10	LRRC26	SLC16A3	CCL2	SLC5A1	FGB	TNIK	CTAG2	LINC00520	AC092143.2	ACE2	IFIT3	MCM5	ANXA10	AL512356.4	PRDX1	HLA-DRA	DLX3	PSG6
15	GYPB	RBP7	GSTM4	TMEM59L	SERPINB1	CKB	BAMBI	MYBL2	STARD3	CD79A	HOXD12	IL25	NUCB2	ECEL1	AP002852.1	NPPB	MT1X	NSG2	IL2RB	ASGR2	FAM224B	CD38	CIB4	RPL36	S100A8	AURKA	AC007922.2	VSIG2	FOS	TM4SF5	TFF3	MUC5B	NPIPB2	ACE	AL049838.1	RPS4Y1	FBLN1	CST6	LIPC	CDKN2B-AS1	RNF213	SYCE1L	AC092902.4	NOTCH2	PSMA2	SERF2	AC016642.1	FSTL1
16	TRIM58	VGLL2	CRYL1	CES1	DSG2	CKM	IGF2BP1	HIST1H1D	P3H4	TENT5C	UBQLN3	AL359762.2	GP2	KRT81	AC130343.1	GPR146	ADIPOQ-AS1	VSTM2L	WIF1	SOAT2	AC090282.1	AL365361.1	LINC02717	RPS8	MAL	CDCA8	EEF1A2	SMIM6	NR4A1	LALBA	AC063952.4	CRIP2	CEACAM7	NAALADL1	DNER	LGR5	GATA2	FST	GABRA3	GPT	PSMB9	AP2S1	MDK	ENHO	PSMB2	HLA-DRB1	ZNF385D	AC009269.4
17	PAGE2B	IL36RN	TKFC	NEUROD1	DSC2	PTGER3	FCER1G	HIST1H1E	SMIM27	PNOC	CDK12	DKK2	DCHS2	STRIT1	AC104024.1	NRN1	AC117509.1	AL355376.1	FGF20	KIRREL1-IT1	PRR20G	AC009570.2	LYPD8	RACK1	MUC21	GTSE1	L1CAM	CAPN8	NRARP	MS4A8	AC007780.1	EGLN3	AF124730.1	SLC2A5	PLCXD3	RPL22L1	SLC1A3	U62317.1	A2M	CES2	OR2I1P	CHCHD5	NAPRT	ADCY5	HSP90AB1	CYSTM1	LOXL4	AC055764.1
18	CR1L	MAGEA12	HAAO	SCG5	CLTB	ALKAL2	CD7	GINS2	ORMDL3	RHOH	TRIM54	LINC02576	MSMB	TRH	FCGR2B	P4HA1	MT1H	PTPRN	IL2RA	CA4	THSD7A	AC104024.1	MS4A8	RPL5	SPRR2A	KIF23	JPH3	SYTL2	HBEGF	CHGB	GALNT8	PRSS1	CHRNA1	CDHR5	CHRM3-AS2	CCN1	GLDC	COL6A1	CES1	MUC3A	PLAAT4	MRPL57	AOC1	KRT73	TOMM22	RPL35A	AMBN	POMC
19	MFSD2B	RAB31	FOLH1	AC055839.2	CALB2	GREM2	IGF2	FEN1	EIF1	P2RY8	FTL	ANKRD20A2	AC020656.1	CLSTN2	KLHL6	SLC2A3	AZGP1	MAP6	IGF2	AC007326.5	CHODL	ADAM19	AC021915.1	TRABD2A	SPRR3	CCNB2	PSG9	TFF2	HSPA6	FAM181B	ITLN1	ZG16B	AC087683.2	AP006216.3	KCNMB2	PHC3	PLAC9	CLDN18	LINC01549	TM4SF20	PARP14	HSPA6	C1QTNF12	AL033384.1	MGST1	LIME1	GGH	SLC18A3
20	AP001056.2	TUBB2B	PRAP1	PCSK1	SFN	TFR2	THPO	CDC45	CDK12	SLAMF7	AC103833.2	FCRL2	HPN	GGH	AC084724.1	AL121904.2	CCKAR	ITGBL1	AC022706.1	AGXT2	PADI3	RHOH	CHRNA7	RPL28	PRSS27	KIF2C	ANKRD30BL	LINC01133	DUSP1	SLC18A1	CLCA1	MSN	KEL	CDHR2	RGCC	OLFM2	SIGLEC6	SERPINB7	TTYH1	HSD17B2	BIRC3	TMEM238	CYP2S1	KRT72	RANBP1	RPL41	AC104078.1	AKAP12
21	HBQ1	HIST3H2BB	PCK2	LINC01863	OCIAD2	SYNE1	SGCG	DNMT1	TMEM99	ASB2	AC010255.1	POU2F3	CREB3L4	MUCL1	THEMIS2	CSF3R	LINC01625	SNAP25	SIRPG	AP002954.2	AC093821.1	IFNG-AS1	MYT1	RPL12	ECM1	CCNA2	AC114776.1	B4GALNT3	NFKBIA	ADCY2	UGT2B7	ITGB6	TRDN	ALDOB	SPOCK1	TSPAN8	LINC01356	ADGRF1	AC021683.2	MUC13	APOL1	SNRPD3	ETFB	MT1H	HNRNPC	RPL36	DYNC1I1	JAKMIP2-AS1
22	SLC25A37	CT45A10	MTTP	KCNK16	EMP1	AQP4	RAMP2	BRCA1	CREB3	AL133467.1	CLU	FYB1	PDIA2	CST7	LY96	LOXL2	POPDC3	OR52N5	LRRC3B	TMEM207	LINC02564	AL589787.1	CDKAL1	RPS15	SCEL	DEPDC1	AC007846.1	SLC5A5	TENT5A	TMEM190	LINC02527	C3	CAMP	MME	AC092681.3	NR4A1	UCHL1	SDR16C5	LMX1A	CHP2	UBE2L6	SNRPG	ACY1	HES4	CACYBP	RPS3A	AC027288.3	LAMC1
23	GMPR	GCSH	DHRS11	CPLX2	SDR16C5	SIGLEC11	DES	UHRF1	RARA	SRGN	ARMC9	ALOX5	ETV5	ANXA9	AC067930.2	TMEM40	PAIP2B	OR52N1	CD28	APOC1	MAGEA4-AS1	RBP4	PKHD1L1	RPL23A	AL731684.1	CDKN3	SLC7A10	DDX60	GADD45B	CRYBA2	AC079949.2	FAIM2	EREG	NOS2	GRIA4	GADD45A	TMEM52B	LAMB3	SEMA3A	SLC13A2	RSAD2	AL021807.1	AFG3L2	HEPACAM2	CCT5	RPS21	APCDD1	ATP1A2
24	NFE2	ANKRD1	GSTA1	TMEM196	S100A6	PRDM16-DT	AC132217.1	DUT	CNP	P2RY10	ADAM9	IL37	CD74	PRR9	P2RY8	C20orf141	C5orf38	CLEC4G	PCDH18	CPN2	LINC02223	IGLC1	DPP4	RPS14	CRCT1	NEK2	LINC02365	SCGB2A1	UBC	AC092675.1	CBWD5	VWA1	DEFB129	CREB3L3	NFE2L2	AC139769.2	TP63	AL591518.1	LINC01622	ALDOB	CX3CL1	LPL	CHCHD10	VAV1	SLC25A5	NPDC1	DNAJC5B	LOXL2
25	BPGM	DPPA2	TMEM253	KCNMA1	CEACAM6	FABP3	TMPRSS11E	MCM4	KRT15	PTPN7	SULT1A3	AZGP1	FAM3D	DPYSL3	ADA2	NXN	MKX	RBPJL	DGKI	LINC02732	MAGEA1	IGKC	VWA5B2	RPL30	TMPRSS11A	PRC1	OXTR	AL158206.1	DNAJA4	AC069404.1	DNAJC7	CA9	CCL20	SLC30A10	OXCT1	EDN1	DOCK9	MMP12	TGFB2	C11orf86	CXCL9	HIST1H3H	GSN	MTNR1A	PARK7	TSPO	DLX4	MSRB3
26	THEM5	CT45A1	DNASE1	SUCNR1	PDLIM7	KCNQ1	LAPTM4B	ZWINT	PGAP3	P2RX5	C4orf48	HOTAIRM1	SELENOM	EFHD1	CD38	HSD17B1	SCUBE2	NALCN	LINC02706	SUSD2	SUN3	CCR10	C2CD4C	C20orf27	TGM3	HMGB2	MARCO	VILL	RHOB	SCG3	FCGBP	HLA-DRB5	ICAM1	PRAP1	KLHL5	BTG2	XAGE2	TACSTD2	ZNF648	SULT1A1	OAS3	HMGN2	AGR3	AC007879.3	CCT7	RPS10	CPA6	NPPB
27	CU633906.2	C10orf82	PPP1R14D	JAKMIP2	DHRS9	ESRRG	ACSS3	LIG1	SMU1	CD38	TRBV7-6	CPB1	SPDEF	RNF182	SLAMF7	ADM	GAMT	DUSP26	PCP4	LINC00501	LINC01249	CXorf21	AL445644.1	RPL11	SPINK5	TROAP	IGDCC4	MUC1	KLF4	SCG5	AC091544.5	TCN1	CD7	FADS6	CCN5	LCN15	MYCN	LBH	PDZRN3	LINC02826	LAP3	SAP18	ZBTB7C	CITED1	ATP5PB	SNHG29	LRRC3B	ADGRE1
28	MPP1	LHX2	ADA	ST6GALNAC5	IL1R2	HRH2	ALPK3	MCM3	ERBB2	GMFG	LINC02205	DKK3	MIA	AC022706.1	KIF19	ITGA5	AC012464.1	PCSK1	RBP1	AC010680.1	MARCH10	MZB1	PROX1	EPB41L4A-AS1	RNASE7	CKAP2	BEX1	FAM177B	ANKRD37	CPE	CATSPER4	ERO1A	AC132217.1	C3orf85	LIFR	TCIM	SH3BP5	METTL27	IGF2	CREB3L3	MX1	ZNF749	SULT1C2	HOXD3	LSM4	PPDPF	OC90	CLEC2L
29	EIF1AY	BEX4	SMIM24	PAX6	LAMA3	KCNJ16	ASGR2	RAD51	ACLY	IGHV3-64	GAL	AC013565.1	SEZ6L2	HOXC-AS1	FCRLA	LINC-ROR	HTR1E	ABCC8	LTA	BPIFA1	AARD	BCAR4	APOC2	GAS5	CRISP3	CENPE	KCNV1	CAPN9	MCL1	SMOC1	RAB26	SPAG4	SULT1C4	SULT1A2	GHR	RHOB	MAGEA4	ATG9B	SDC2	OTOP3	ETV7	SKA3	HOXC10	MT1G	PSMA5	RPL12	KCNN1	WNT7A
30	BNIP3L	CSRP2	REEP6	MAP1B	SDCBP2	RELL1	PAH	UBE2T	TMEM141	DERL3	CRIP1	CORO2B	SERPINA5	LRRC43	NCAN	EBI3	AF131216.3	ECE2	STRIT1	LRTM2	AC098484.2	LINC01484	SOX4	RPL19	SERPINB13	BUB1	KAZN-AS1	B3GNT6	MAFF	SLC29A4	LINC00535	CFB	LINC02188	SLC46A1	AC091544.5	LINGO1-AS1	CLDN6	DHRS9	PLCL1	TMEM54	TGM2	UBE2S	GABRP	DOCK8	STOML2	HLA-DPA1	CST1	CSF2RA
31	RHCE	TNNT1	PIGR	ECRG4	RALA	CYB5R1	LDHB	FAM111B	APTX	LAX1	GPX2	PTGS1	KIAA1324	AL589765.7	AC011815.2	ZNF350-AS1	NUPR1	DEPP1	TNFRSF4	AC092651.3	TRO	P2RX1	AC010641.2	TMEM176B	SLURP1	CEP55	AL353709.1	SOSTDC1	AC020916.1	ADORA2A	FETUB	DOC2B	FOLR3	CIDEB	ALDH1A1	ZNF703	BEX3	TYMP	SYT1	CAMK2N1	APOL2	HMGXB4	HSPG2	CASP5	HSPE1	RPS12	AL359915.1	ZNF114
32	Z93943.1	L1TD1	SULT1A2	ADAMTS12	PLEC	DUSP4	PRAC1	TCF19	NDUFB6	JCHAIN	FAM215B	GNB3	S100A1	DYSF	AL359834.1	OLR1	CCDC110	SLC22A17	TNFRSF18	AC025839.1	CTNND2	SLAMF7	FRG2B	RPS3	C5orf66-AS1	BIRC5	LINC02817	IFI27	BRD2	CALCR	AP003498.1	PMEPA1	CEBPD	MS4A10	GUCA1C	SEC62	LINC00958	ANXA1	AC011445.1	DHRS11	ICAM1	NDUFA3	BLVRB	CDK18	TXNL4A	RPL13	NXPH3	AKR1D1
33	LINC02739	HOXA7	FABP1	AL049646.1	CGB8	COL2A1	FXYD2	CENPU	TLN1	ARHGDIB	EIF2S3B	PIK3CG	HLA-DPA1	IGF2	BHLHA15	SLC43A2	TCEAL2	RIMS2	CCR7	AC114550.1	DPEP3	AL589702.1	AC122694.1	EIF3K	FMO2	CKS2	AC007952.7	ATP2A3	KLF6	TM4SF4	STK31	MMP7	AC020916.2	S100G	RAP1GAP	ID3	IFI6	ITGA2	AP002907.1	C3orf85	PSMB10	SYMPK	GDPD3	AL355102.4	STRAP	HLA-DPB1	WNT6	LVRN
34	MKRN1	FSCN1	SLC39A5	CHGB	GJB4	GBGT1	FKBP10	RAD51AP1	CYP2W1	IGHA1	G6PD	GABRA4	HLA-DRB1	CD36	AC243960.3	ENO2	AC087477.2	RPRML	CCR5	PCP4L1	AL139002.1	CLECL1	NTS	REG1B	RHCG	PIF1	AC068279.2	RASEF	SERTAD1	MMP16	CCL24	SLURP2	CHI3L1	MGAM	FAM131C	SELENOW	CT45A1	AL365226.2	AC132217.1	ETHE1	IRF1	TMEM160	HOXB7	AC023830.3	H2AFZ	RPL24	TMEM59L	AC244153.1
35	LINC01909	NSG1	PYCARD	AC010335.1	TUBA4A	FRMD1	LINC00665	DHFR	IGFBP4	DYSF	VSIG1	PLCG2	AC025154.2	RASGRF1	CFAP58-DT	FEZ1	NDST3	LY6H	PTPN7	GPC3	DCDC1	NTM	PCLO	ITPA	KLK12	ARHGAP11A	MAGEA8-AS1	FER1L6	PARD6G-AS1	AL133343.2	REG4	CA12	AL096706.1	NPC1L1	HRH2	MYADM	H19	PIK3IP1	CTNNA2	TM6SF2	GBP5	POLR1B	ACADVL	HRCT1	UQCRFS1	CXCL17	DPEP1	ALPL
36	SLC25A39	SALL3	ADIRF	MMRN1	GPRC5A	IGFBP2	SLC39A2	DTL	WIPF2	ITGB7	MGST1	GRASP	SRARP	FOXH1	TLR10	COL5A1	PDIA2	PTF1A	GLUL	LINC00393	AL139124.1	AL161938.1	MLN	RPS23	LYPD2	KNSTRN	CLIP3	VSIG1	JUND	AL365394.1	OSGEPL1-AS1	SLC6A14	AP003559.1	ACE2	ARRDC4	LRRC31	LIN28B	LAMC2	STRIT1	SHD	IFI35	CABIN1	CYBA	CCL23	SNRPE	NUDT8	NOTUM	FBLN2
37	HSD17B3	GABARAPL1	TMEM82	GNG4	ITGB4	IDH2	AC093001.2	CDC6	MSL1	IGHV2-70	NEXN-AS1	ANKRD20A1	FUT9	UPK2	AC131025.3	PSG5	AC005332.2	S100A1	CD3G	SARDH	PKIA	LINC00707	AC013448.2	RPL35	S100A9	NDC80	LINC00987	SPTSSB	SOCS3	AL731557.1	RAB3C	OSMR	LINC00862	ABCC2	RBPMS2	ETS2	LINC01287	CHAC1	PGM5	CHST5	TAP2	HIST1H2BH	AL365226.2	CCNYL1	PSMB3	SPINK1	WNT10A	COL4A1
38	DCAF12	FERMT2	SULT2A1	FAM13C	VAMP8	NID1	CTNND2	WDR34	UPK3A	HCST	AC010761.2	HMX3	LDB2	HSPB6	PDE4B	RRAGD	AL591501.1	MAOB	ANKRD34B	PPP1R14A	ANKRD7	LINC02362	DACH1	C19orf48	TMEM40	AURKB	CPA4	HPGD	PMAIP1	FGF14	AC026367.2	NDUFA4L2	AC245014.3	ADA	MFSD4A	PADI2	ELOVL5	PLA2G2F	COL9A3	CDHR5	AC022034.1	ZC3H8	SPNS2	MT2A	EIF3I	RPL9	ADAMTS18	DLK2
39	CNTNAP3B	STMN1	TM6SF2	PEX5L	RHOF	HACD1	CHST13	ORC6	KRT19	CD48	NQO1	DCLK2	HLA-DPB1	CES1	AC007365.1	SIGLEC6	B4GALNT2	RAB3C	HS3ST4	AC008609.1	TENM1	BTLA	ITGB8	RPL7A	PADI1	KIFC1	PRR20G	CA2	CITED2	KCTD12	AL451064.1	HAS3	DES	ABCG5	CKMT2	RBPMS	OBSL1	GABRP	LARGE2	SLC4A7	XAF1	HIST1H2BD	ELOB	RHOV	POMP	HLA-DRB5	PCOLCE2	DEGS1
40	LINC02560	YWHAQ	CHP2	SCG3	CLDN14	CPM	CPN1	RFC2	FIBCD1	TCF4	SLC19A3	KIT	PRSS23	ITM2B	LINC00539	STC2	GNMT	SLC38A3	CXCR6	APOE	ELOVL4	EYA1	LFNG	RPS13	NCCRP1	RACGAP1	CALHM5	ABCC5	INTS6	VSTM2L	RPS29	TIMP1	EBF4	MTTP	KCNJ16	HMGCS2	BASP1	SPNS2	HOXD3	RGS2	ZBP1	ABHD3	REPS2	PRKG2	YBX1	RPL39	BAMBI	PSG2
41	ADIPOR1	TMEM52B	URAD	TUSC3	LAMB3	SMIM38	CSAG3	CDCA5	UNC13B	SIT1	GSR	PSTPIP2	CST3	SLC22A31	RFLNB	BICRA-AS1	DUOX1	STMN2	CD3D	CHST9	CRH	AC007569.1	ETV1	NACA	SBSN	ANLN	GOLGA8M	ANKRD36C	IER5	NKX2-2	ZG16	MUC4	LRG1	SLC5A9	ESRRG	KCNN4	MUC15	AL355312.4	ZNRF3-IT1	ESPN	CXCL5	GUCD1	CCDC198	PIK3AP1	MRPL3	MZT2A	DMRT2	LARGE2
42	RHEBL1	MAGEA3	PEBP1	NECAB2	SERPINB5	AC008268.1	SP5	FANCI	DNAJA1	LINC00891	AK1	FOXI1	VIM	FKBP10	DUSP5	MMD2	SEMA3B-AS1	SCG3	CNTN5	GSTA2	CLCNKB	AC008406.3	TBPL1	RPL4	AC087386.1	PSRC1	SOX15	PLCXD1	SLC38A2	REG4	REP15	HIF1A	S100A9	TREH	GLUL	APP	ADAMTSL4	TGM2	AC010275.1	TMEM253	SAMD9L	PAX8-AS1	MVP	NAPSA	MDH2	RPS26	BGN	AC020913.1
43	GLRX5	GDF6	UGT2A3	TMEM132D	MYL12B	LIFR	CPA6	RECQL4	CHMP5	LPXN	TKT	PLCB2	CXCL17	KRT31	AC064836.4	AC092078.2	RARRES2	KIF5C	CD247	TFPI	TEX41	LINC00683	AC023300.2	ATP1A1	AC074033.1	CDCA3	CST7	RFLNA	DNAJA1	CGA	EIF3E	ITIH4	TNFAIP2	DHDH	EIF5A2	THBS1	TENM3	ABHD11	CHST15	GCNT3	CIITA	ESCO1	LGALS3	OR2S2	FABP5	RPS9	FZD10-AS1	C1orf158
44	AP001972.3	POMC	SLC5A1	KCNT2	TIMP1	RGMB	EVX1	HIST1H3B	MIEN1	SELPLG	AC004832.5	CALHM1	AC079298.1	CRYAB	AC012645.3	SLC2A1	CXCL17	DACH2	ASPSCR1	SERPINH1	COL23A1	AC011700.1	ANXA13	EEF2	SPRR5	KIF20B	RAB39B	LINC00342	PPP1R10	VGF	FFAR2	ANGPTL4	ALPK3	CYP2D6	ADGRD1	ATF3	P2RY6	PDZK1IP1	DRD2	BTNL8	IFI44L	MIB1	AC008397.1	TMEM26	MTCH2	MZT2B	TRDC	MEST
45	DCST1-AS1	RRAS2	PPP1R16A	GPR179	RRAS	RAP1GAP	GNG4	MCM6	PGGHG	CSF2RB	AC005670.3	AC002456.1	TMEM98	CLEC2L	C16orf54	FGF11	DCXR	BEX1	C3AR1	AL139042.1	LIMS2	LAX1	PAM	RPL18	ZNF365	SGO2	ENTPD1	EFHD2	NFKBIZ	TMSB15B	AC011503.2	CAVIN3	MYBPHL	ASPDH	LINC02640	DUSP4	CAV1	HLA-E	AC099792.1	REG4	IFIT1	AC020915.2	SUCNR1	FAM13A	ATP5F1C	NME2	CADM1	VGLL1
46	STRADB	MYLPF	SLC13A2	AL138478.1	CEACAM5	APLP1	ARID3A	HIST1H2AH	MED24	MEF2C	SLC22A18AS	LINC01792	COL11A2	TPD52L1	KCNN3	AC003093.1	C11orf21	INA	SPN	PLTP	LINC02726	CLEC7A	IL13RA1	RPL10A	CAPN14	TOP2A	ANGPTL7	SYTL5	CLK1	BRS3	URAD	KRT16	OBSCN	MYO15B	AC108488.1	LEFTY2	SMTNL2	LMO7	LINC00621	CDH17	BATF2	ZNF593	ZNHIT1	EXD3	SLC25A3	RPL22L1	SP9	AC008753.2
47	AC139795.2	PGAM1	SFRP5	MIR7-3HG	CAV2	CKMT2	UPK1A	HIST1H4F	CYB5B	CYTIP	AC087491.1	CRYM	SHISA6	AL354740.1	Z97832.2	CYP11A1	DEFB131B	RBP1	ABCB1	TMIGD1	WASF1	PIM2	HOPX	RPS12	CNFN	KIF14	CLGN	FSIP2	BTG2	PDK4	ST6GALNAC1	MIR210HG	GPR132	ENPP3	ATP4B	BBC3	AL139023.1	PLAU	LINC02418	LINC00668	TRIM31	SELENOW	CFD	PDCD4-AS1	EBNA1BP2	DEGS2	AC019068.1	LINC-ROR
48	LINC01224	TAGLN	FCGRT	ATXN8OS	S100A10	SLC2A12	MEF2C	C21orf58	NOL6	ST8SIA4	TNNI3K	OR14A16	SNTB1	TNNC1	KLF7-IT1	LDHA	AC108861.1	WNK3	LAPTM5	IDH1	CERS3	ITGB7	AL589702.1	RBCK1	SRPX2	NUF2	TIMP2	GALNT6	SOCS1	AL161941.1	AL121906.2	CLIC3	AL031666.2	SI	FAM155B	RASSF4	PCAT14	IRAK2	FXYD2	MEP1B	TNFSF10	ZNF580	LGALS4	TMEM176A	PSMB1	RPL14	AC093894.2	GCK
49	RBM38	PFN2	OTC	GP1BB	KRT8	GLUL	DBN1	MCM10	AKR1C3	LINC02384	COTL1	ITPRID1	STK32B	AC073210.3	AIM2	PALM2-AKAP2	S100A1	CPLX2	LINC01801	ELFN1	GABARAPL1	GFRA3	SLCO5A1	RPL21	AL121933.2	KIF4A	AL135784.1	OASL	IFRD1	MYH13	AC022217.3	SAT1	AC018953.1	ADIRF	KIT	AC007906.2	PRAME	RAB3B	SCUBE3	MYO7B	HLA-F	CD109	BLOC1S1	LINC02826	PPP1R14B	TMEM238	AGTR1	TCERG1L
50	CR1	SKP2	MPST	IGSF10	IL32	SCPEP1	HOXD10	DEK	CYP2B6	FAM49A	CD24	B4GALNT4	GMPR	VAT1	AC093307.1	C1S	CIRBP	TRPC4	CCR4	PEG10	AC010745.2	DUSP5	TNFRSF11B	NOP53	AIF1L	HJURP	DRD2	PPARD	BCL3	GNG2	AC022182.1	CXCL17	CHRD	C2orf88	TRPM3	ZFP36L1	CLDN19	TP53INP2	GABRB2	GDPD2	HLA-E	TMSB10	SYT8	TMEM176B	PPA1	RPS23	SORCS3	CADM1
51	YPEL1	DPPA3	HSD17B2	PAM	RAC1	ANGPTL3	EPHA6	DSCC1	HINT2	PTPRCAP	AC253572.1	CACNA2D2	HLA-DMA	KCNMA1	FCRL5	AC020934.1	PEBP4	CCKBR	IL7R	NKAIN1	DBX1	TSKS	GUCY2C	RPS9	TTYH1	UBE2S	KLK5	REP15	DNAJB4	CNIH2	TATDN1	COL18A1	AGT	GK	SLC2A12	CAPN12	TFAP2C	RAB11FIP1	HS3ST4	TM4SF4	SECTM1	MICOS10	NOS3	CD40	PGK1	STARD10	LINC01241	XAGE2
52	LRRC2	GOLGA6B	MALRD1	DUSP26	ANXA5	CCNJL	DSCR8	MND1	NFX1	GYPC	MRPL23	CD300LF	GLP1R	GPX3	HS3ST3B1	HEG1	SLC22A31	PDE8B	FZD10	AC093388.1	LINC01194	TXNDC5	TUBA1A	RPS7	SPINK7	CKAP2L	CIDEA	AKR1C2	TNFSF9	INHBA	KRTAP3-3	PPP2R2C	SPRR2A	CEACAM20	ATP4A	PLEKHS1	CHST14	GPRC5A	CLSTN2	PCK2	CMPK2	FMC1	ASL	GPA33	PRMT1	FXYD3	CALCB	SAP25
53	FAM210B	AC012508.3	CYBRD1	GNAO1	IFNGR2	ESRRB	ID1	CENPX	TOPORS	SP140	LRIT3	MELTF	SSR4	DPEP1	JCHAIN	PICSAR	AC012409.1	GDAP1L1	NCKAP1L	AC096589.2	AC021087.1	BMP6	CACNA1H	NOX1	PPL	TACC3	CNN1	SGSM3	HSP90AA1	PCYT1B	AL442636.1	GNA15	AC124276.2	C8G	CLIC6	CDK6	ANXA8L1	PRSS8	FKBP10	SMIM24	TNFAIP2	NOSIP	IGFBP4	DNASE2	VDAC1	H2AFJ	AC073283.2	AC011284.1
54	ABCA9	SSTR3	SLC35G1	ANK2	MYL12A	PXMP2	MFAP2	HIST1H3D	CLDN3	CD52	SQSTM1	DCC	CLDN10	NES	TAGAP	PSG2	PIFO	NOVA1	IL10	KCNJ13	NUDT10	EAF2	HIST1H2AC	RPS25	CSTA	CDK1	TUBA1A	RAB27A	KCNQ1OT1	VWA5B2	LINC02163	PDIA2	AL121990.1	C11orf86	ARMH4	IER5L	APOE	UPP1	EVA1A	SLC6A19	IFITM3	CYTOR	RPL17	CHP2	ALYREF	RPL13A	TSPAN11	ADAMTSL4
55	C8orf37	TJP1	MME	BTBD17	ITGA2	ETNPPL	XCL1	EXO1	MRLN	IKZF1	AKR1C3	PCDHA8	SERPINA4	PTK7	C22orf24	ADGRE1	B3GAT1	LINC02648	LINC01116	COL5A2	ZNF382	C16orf54	WNT4	EEF1A1	PAX9	KIF11	CAPN3	FAM102A	CBX4	EMC10	CCDC192	HLA-DRB1	NENF	AL360169.3	ETNPPL	EGR3	LY6E	DEFB103A	CFI	DGAT1	IFIT2	HIST3H2A	MLPH	CNTFR	MRPS35	RPS6	SOX14	KLRG2
56	ZNF709	BEX3	OAT	AMER3	ANXA1	FUT1	LBX2	RRM1	GCC2	WIPF1	AC016866.1	NPY	TESC	FAM92A	JSRP1	ART4	HOPX	SH3RF3-AS1	TOX2	SLC37A2	ADAM23	PPM1E	APOL4	RPL36A	AC019349.1	KNL1	AL158832.2	SMIM5	PLK2	AC005323.1	ATOH1	NNMT	LYPD2	ANPEP	KIAA1191	CCN2	PDIA6	IL1F10	AMACR	ACAA1	TRIM22	HSPB1	TP53TG1	ALMS1-IT1	PSMA3	POLR2L	AL163872.1	SERPINE1
57	DCHS1	CALD1	METTL7B	RTN1	IL2RG	CYFIP2	LINC01414	MCM2	IFITM1	SEPTIN1	VDAC1	PIK3R5	EPHB3	COL4A1	XBP1	HK2	IRX3	FFAR3	LTB	AC090192.2	BAAT	AC012360.1	SCG2	ANXA13	ANXA9	TTK	AC006452.1	SLC9A3R2	ZC3H12A	RIIAD1	TPSG1	LTC4S	GABRE	UGT1A1	SLC2A4	PDLIM1	MYH10	RND1	FZD10	TTC36	GBP2	CDKN3	DPP7	CCNJL	EEF1E1	MGST2	AP003110.1	BASP1
58	ACTRT3	HOXA4	GPD1	KCNN3	ANXA3	TM7SF2	RAB34	MCM5	WDR24	RECK	LINC02331	MAPK10	SCGB3A1	CASTOR1	ST8SIA4	HCAR2	FOLR1	PCSK1N	UBD	SELENOP	IGDCC3	TSC22D3	TMEM200A	RPS4X	GCHFR	FAM83D	ANKRD33	EPS8L1	CHORDC1	CNGA3	KRT10	RARRES2	HP	SMLR1	CNTD1	ENC1	FSTL1	CD59	AC064856.1	MUC17	IFIH1	FTL	TSPAN8	CASP1	HSPA8	ORM2	CYP1B1-AS1	AL161431.1
59	TSPO2	NMRK2	FUOM	KCNJ6	CAP1	FXYD4	AC004556.3	RFC4	POFUT1	CD53	TNFSF11	AL139339.1	NPDC1	ZNF385A	IGHG3	S100A7A	SBSPON	AC106864.1	F13A1	UPK3A	ACTC1	ITGB2	PTCH1	ALKBH7	CD200R1	TNFAIP8L1	DPEP3	B3GALT5	HEXIM1	IL13RA2	RAB5C	TRNP1	BNIP5	GDA	APLP1	AC023490.2	MXRA7	TMPRSS2	BMPR1B	ADIRF	OAS2	OR2B6	TSPAN1	MT1X	SLIRP	RPS14	OLFML3	NMRK2
60	RIBC2	EIF2S1	ANKRD40CL	BEX1	S100A14	LRIG1	AL391361.2	ESCO2	PROCR	CD79B	FAM162A	AC079447.1	FGFRL1	GRN	CCDC102B	EPOP	AC012574.2	AC105271.1	LEF1	CD7	SLC27A6	KCNA3	GDAP1	BST2	FCGR1B	SPAG5	RASGEF1C	LIPH	HSPB1	MIR7-3HG	LINC00616	MXRA5	IL23A	FABP2	CYP7B1	JDP2	STEAP1B	NTHL1	LGR5	LGALS4	HAPLN3	ROMO1	CTSS	PPP1R14D	ERH	RPL18A	FREM2	LINC02359
61	PIP4K2A	LINC00958	GSTA2	SPRED3	CDA	CLCNKA	C2	CENPK	KRTAP4-1	MEI1	DHRS7	LINC02690	SLC12A2	HOMER3	NR4A1	RGS10	PLTP	CLPS	LINC01622	MYL3	SLC6A11	PDZRN3	POU6F2-AS2	RPL41	TTC9	INCENP	FMNL1	IGSF9	ZC3HAV1	CELF3	EIF1	VSIG1	VPS9D1	ATP8B2	AC061958.1	GABRP	TUBB6	FAXDC2	GREB1	GDA	HLA-DPA1	TTL	ABCB8	VIPR1	NHP2	RPS13	AC073517.1	AL031767.1
62	RFESD	SAMD11	TTC36	TSPAN2	F3	KLK11	ITGA9	ATAD5	RARA-AS1	IRF4	MTDH	C12orf74	LMCD1	SHISA4	TGFBR3	AEBP1	GUCY2D	ACTL6B	ARHGAP31	LCT	AC008556.1	CYTIP	ALDH1A2	RPLP2	LINC01895	CDCA2	AC015853.2	CTNNBL1	RASD1	WNT4	RPL37	HLA-DQB1	TNFSF14	MYO7B	LARGE-AS1	PRAG1	ISYNA1	LHFPL2	ZNF471	GPAT3	VAMP5	STMN1	LAD1	CDH23	PSMA6	RPL31	ALK	OR56A3
63	AC016396.1	C8orf31	SMLR1	NAP1L2	PLEK2	ADGRD1	ADAMTS19	E2F1	MSRB2	ENTPD1	SH3KBP1	TNN	COLGALT2	ST8SIA6-AS1	AC008105.3	SH3GL3	GSTA4	TRBV14	TRAV30	SOGA3	DUXAP8	AL513534.2	KCNH6	RPS11	SPRR1B	BUB1B	COL25A1	RASSF6	EGR2	SLC12A5	KLK1	PKM	KIRREL1	CD36	EGFL6	FHL2	TUSC3	CD163L1	LINC02413	MYO15B	APOL6	BOLA3	CALML4	APOBR	TOMM6	UQCRQ	FGF18	CHST14
64	MYL4	C16orf87	MOGAT2	SLC35G2	FA2H	SYNGR1	FGB	E2F7	PTK7	PRKCB	KLK13	NRROS	GADD45B	KLK12	DERL3	CSF1R	PLA2G1B	MARCH4	AC017002.3	TFEC	LINC02476	MEX3B	KCTD12	RPS27A	RAD9B	ARL6IP1	MIR3659HG	ACER2	CSRNP1	AK5	TCEAL3-AS1	GPRC5A	AC007325.4	FGL2	VLDLR	WNK4	CPVL	APOL1	NFIA-AS2	AKR1C1	SP110	RAMP1	GSTK1	APOC2	PTMA	RPL3	MSX2	AC009558.2
65	TLCD4	MAGEA4	CDC42EP5	DSCAML1	CSTB	RAB11FIP2	GPC6	CARHSP1	RGP1	ACVRL1	MTUS1	DEPDC7	THBS1	NSMF	NLRC3	PHACTR1	DM1-AS	CDK5R2	ICOS	PROCR	NLGN4Y	TAGAP	SLC25A27	CDX1	PORCN	CKAP5	ARSI	GSN	ID2	RAMP1	C17orf113	BMERB1	AC129507.4	SUSD2	CDH2	UPK3B	TGFBR1	UBE2H	MYBPC2	PEPD	CFB	CDC42EP5	FIS1	OTOP3	BTF3	TPM2	CD8B	LINC01988
66	FECH	DKK3	DGAT1	VWA5B2	SULT2B1	RBPMS2	FADS2	DNAJC9	RTL8A	BEST3	AKR1C2	RFPL1S	KCNN4	CSAG1	AC125616.1	MT3	LINC00261	GPR42	WNT6	UNC13A	AL589740.1	XBP1	PPFIA2	RPL37	HOTAIRM1	CENPW	AL645608.8	SLC9A1	CCNL1	DDC	KRT20	CD5	TAC3	PMP22	HESX1	RAB11FIP1	NSG1	RDH10	DLK1	DHDH	CD274	DPM3	IL1R2	EREG	TCP1	OST4	NKD1	AC026358.1
67	AC073210.3	PYGL	PTGR1	QPCT	ITGB1	TRIM74	GLIPR1	HMGB2	BCAP31	NCF4	STK39	PCDHB2	P3H3	PABPC1	KLK4	ANKRD1	AC008736.1	TRAV4	SRARP	FMO1	EVC2	AC026329.1	CACNA1A	GSTM1	SYNPO2L	SMC4	CPXM1	SPATS2L	KDM6B	CACNA1A	DLL1	C1R	ZBTB46	AVP	GUCA2B	LMCD1	STC2	PTAFR	SLC45A2	TMEM82	PDCD1LG2	AC040169.1	AHNAK2	MAB21L4	CCT8	PLA2G10	AC136475.5	COL9A3
68	E2F1	GNAS	LGALS4	ARX	GDPD3	ENOX1	DEFB129	HIST1H3C	EFNA4	MDGA1	AC007879.3	GRIK1	FAM3B	ZFAND4	MIXL1	WNT11	RNLS	KLK11	LCP1	HPN	IGSF1	ABCB4	RFX6	ARHGAP4	CLCA4	NCAPD2	NLRP5	CYP3A5	SNHG12	LINGO2	LINC00476	SLC40A1	B4GALNT4	MUC3A	ST8SIA1	HOXA9	AC020914.1	GH1	ARL11	SERPINB6	HELZ2	AC015871.1	KRT7	MT1E	ATP5F1A	GSTP1	ATOH8	AC245041.2
69	AL031005.1	CLIC4	SULT1A1	SLC7A14	ECE1	CDH2	SALL4	POLD1	KRTCAP2	LINC01914	YWHAH	AC025048.4	HLA-DRA	LINC00616	PLS3-AS1	TIMP3	ALOX15B	AQP8	SLAMF1	ERVV-2	SCML2	PIK3R5	VPS13A	RPS6	EMP1	SAPCD2	PSG2	SLPI	BTG1	THBS2	CCDC60	PLOD2	EDIL3	XPNPEP2	GSDME	EPHB2	ZIC1	SLC6A14	AC104958.1	NAPRT	IFITM1	SNRPE	ONECUT2	CLCN1	PSMA7	C12orf57	MYH7B	PICSAR
70	PTPRG-AS1	GPN3	CARD16	CACNA1A	CKLF	ATP1B1	SOX18	NASP	PID1	LINC01353	PNMA6A	FGF8	IFI6	SAPCD1	RCSD1	VTCN1	TIFA	NRSN1	LEF1-AS1	GLUD1	ADGRL3	TMEM158	RBP3	RPS28	IL1RN	NCAPG	MAP1B	BICDL1	PLK3	LINC01811	PGM5	CD24	AL136962.1	MYO1A	STX12	ALDH1L1	GATA3	FBXO32	ETNK2	ANKRD40CL	SAMHD1	RPP21	BRI3	MEIS1-AS2	NCL	RPS27L	FZD10	ANKRD1
71	ZNF2	AIF1L	CES2	TMEM190	KRT19	LINC01679	HOXB13	EZH2	FXYD5	SUB1	TMA7	AC006116.9	TMED3	CYSRT1	SLC8A1	SLC2A1-AS1	EFEMP1	LHX5	SYT11	ADORA2A-AS1	TTC23L	TNFRSF13B	COL4A4	VPS51	KRT16	TUBB4B	GH2	FA2H	MYADM	TMEM86B	LINC01414	TNFRSF6B	CFB	ABCG2	AL022162.1	LINC01120	L1TD1	IL36B	CPN1	GNA11	PARP9	SEM1	GPX2	KRT2	PRELID1	MGMT	LMO2	FOLR1
72	POMGNT2	ZNF667-AS1	SLC22A18	CACNB2	MMP28	RGN	LINC01980	CHAF1B	NUDT3	TNFRSF17	AKR7A3	CHAD	SERTAD4-AS1	GDNF	SLC9A9	CAVIN1	ANKRD65	AC012213.1	CD3E	S100Z	LINC01518	DERL3	LINC01811	CCNB1IP1	MGAT1	GPSM2	DIRAS1	LINC01559	DNAJB6	CACNA2D3	CBWD6	NUPR1	IL4I1	TBX10	LINC02762	RETREG1	VIT	LINC02608	KCNJ10	PPP1R14D	DDX60	EEF1E1	SUCLG2	FYB2	TIMM17A	WDR83OS	GPR132	ATP6V0A4
73	PRR19	PRDX6	SAT2	AF279873.3	MYL6	CPEB4	CKB	MNS1	QPCT	EMP3	LEMD1	LRRN2	VWA1	AL035446.1	LINC02362	PFKFB4	CGNL1	BOC	PCDHB12	ZNF716	CCBE1	AL354733.1	KCNH2	CCL15	LCE3E	TUBA1C	IQCA1	CSTA	RSRP1	LINC01445	AL022151.1	TMC5	PARM1	MPP1	G0S2	EPHB1	BEX4	AC008875.3	AL117335.1	SLC9A3R1	HLA-B	GALK1	NARS	KRT20	TPI1	SYTL1	KLF14	LY6K
74	U47924.2	ACP1	AC007877.1	AK5	AHNAK2	CHST3	AC004080.1	TMPO	PLAAT3	NUGGC	ANXA4	AP004147.1	PALMD	COMMD9	AC100771.2	CRH	SEC62	KCNJ6	P2RY10	SGCE	MAGEA11	WNT9A	AC022893.2	LINC02582	CEACAM7	LMNB1	SLC35G2	DUOX2	MIR22HG	CBY3	SBSPON	SELENOM	CXCL2	CYP4F2	ALPK2	DPYSL2	MEST	IGFN1	NTM	AOC1	TAPBP	LINC02830	GRN	ADAMTS14	ENO1	MRPS21	GJA1	GDF6
75	TEDC2	CT45A5	CTSZ	TRPC4	CLIC1	TBC1D14	CEBPD	TUBB	KIF5B	WAS	ATP5ME	AC007749.2	LINC00261	AC069410.1	PHACTR3	SORCS2	GPRC5C	SYT5	LCP2	MFGE8	MAGEB1	PECAM1	GRIN2C	PSMF1	SERPINB3	FOXM1	AC133785.1	RAB37	ZFP36L1	SLC6A5	PERM1	MUC1	TRIM31	DGAT1	SEMA3B-AS1	ID1	AC245041.2	ICAM1	AL121917.2	CLCA4	OAS1	CD177	CD63	SLC30A4	SNRPF	SNHG8	AL645608.6	CLDN6
76	HSF4	AC125618.1	PLA2G12B	AC008808.2	TPM4	INSIG1	HIST1H1E	SIVA1	FBXL20	RUNX3	HSP90AA1	ZNF804B	HLA-DRB5	FGF3	AC107081.2	TRIML2	KLK11	MC4R	NDP	AP000944.1	CT45A10	UBE2J1	FSD1L	PLEKHJ1	NIBAN2	CDC25C	LINC01615	GPX3	TSPYL2	ASGR1	AC026254.2	MPZL2	DSCAML1	SECTM1	NR4A3	ARRB2	ZFP42	KRT6A	SMOC2	VIL1	NLRC5	MRPL33	SQSTM1	C2	HMGA1	PNKD	AC022706.1	SLC13A3
77	FBXO7	TUBB6	NAGS	SLC35F3	CST6	SLC26A9	PKIA	POLA2	ICA1	TBC1D10C	RPL38	TEX26-AS1	C2CD4B	UPK3B	HIST2H2BF	EGLN3	CELA3A	PPP1R1A	SPOCK2	SCG3	JAKMIP2	HCN2	SYT13	RAMP1	SPRR2F	KIF18A	ZNF835	KLF2	ITPKC	PAK3	FRZB	LINC00342	KISS1	LEAP2	FRMD1	TRAPPC6A	PPT1	CARHSP1	AL359504.2	CDHR2	PSMB8	HIST2H2BE	CSTB	NBPF14	SRM	PPIB	GABRA3	CAVIN1
78	SLC22A4	NELFCD	TMEM256	BAALC-AS2	RAB5IF	PDGFD	H1FX	RNASEH2A	VAV3	SH2B2	PARVB	SELPLG	GADD45G	PLA2G4A	NCF4	MTSS2	ANAPC16	HMX1	AC090709.1	MSR1	PDPN	KCNK17	NAAA	EEF1B2	CHST4	PHF19	IL31RA	C1orf116	HSPA2	DNAJC12	AC092142.1	MUC5AC	KNG1	C1orf115	NEGR1	SOX9	SALL4	PITX1	CCN2	CYBRD1	PSME2	TTC39C	SMIM22	AL078621.4	PFN1	HLA-DQB1	ACKR3	AP005210.1
79	TCP11L2	AC079460.2	FBP1	PAUPAR	ANTXR2	CCKBR	PCBP1	BARD1	HMGCS2	CD19	RPS29	SDC2	REG3A	NOMO2	CCDC69	CLIC4	SCTR	P2RY14	ASB4	DLGAP4-AS1	MIMT1	PIK3CG	AC112482.2	GPX4	LINC02303	KIF22	AC010247.1	FAM3B	SLC5A3	AIDA	TPM1-AS	BACE2	TNIP3	CDKN2B-AS1	PDGFD	DUSP2	KCNG1	ERO1A	CERS4	ACSL5	NUB1	SUB1	AC023090.1	CPA2	PRDX3	ATP5MC2	LYPD1	SEMA5A
80	CFAP65	PRAME	ALDOB	AL133415.1	ACSL5	CTIF	RPL23	GINS1	SPSB3	HCLS1	AC011586.2	ABI3BP	VKORC1	LYPLA1	STARD13-AS	AMOTL2	CELA3B	CHGA	TMEM47	AC108690.1	APBA2	AP001994.2	NR2F1	SLC25A6	PHLDA1	PRR11	AL590235.1	ANKRD29	FOSL1	SNAP25	RSPH4A	SEMA3B	PTGS2	HNF4A-AS1	MYRIP	NR4A2	UGT3A1	CDKN2B	LRRC3B	MOGAT2	HLA-DRA	LSM7	C19orf33	BEND5	TXN	FAU	RPL34-AS1	AC009139.1
81	AC008035.1	BASP1	AKR7A2	NKX2-2	SQOR	VEGFB	ERP27	RAD54L	CCDC107	NRIR	FAHD1	PTPN18	TNFRSF19	NELL2	TNFRSF17	GATA3	CYP2C8	PSD	BAMBI	SMLR1	ARMCX2	TENT5C	CHGB	RARRES1	CYSRT1	PBK	AC010531.5	UNC5B-AS1	MIDN	PRCP	NKIRAS2	TFF2	CASP5	MAF	Z82198.2	EPHA2	TDRD12	LINC01517	AL391883.1	GSTA1	OASL	MAGOH	ADAP1	BTK	ACTG1	RPL36A	AC091806.1	AC002480.2
82	TBC1D22B	AMOTL2	SLC2A2	BAIAP3	GJB3	FGG	SLC19A3	CHAF1A	SESN1	IGKV4-1	PSMD1	AC092384.1	CFB	AC106858.1	ZNF391	SH2B2	GPHA2	PDZRN3	PITX2	PGLYRP2	ZNF614	PCED1B	MATN2	RPS16	AL121761.1	IQGAP3	POM121L2	SYTL4	ARL14	NFASC	AC156455.1	BHLHE40	CHST13	OR51C1P	IDH2	CCND1	TENM3-AS1	KLK6	TBC1D4	LEAP2	IFI27	RPL18	CBLC	PPP1R14C	ATP5MC3	GMDS	SERPING1	ADAM23
83	AC016394.1	PRKAR2B	BTNL3	ADAMTS18	YWHAZ	A4GALT	EVA1A	POLQ	TOMM6	GSEC	KLK10	LHFPL3	COL18A1	GRAMD1A	A1BG	FUT11	BEX5	INSRR	GPR174	LHFPL3-AS2	GRIP1	TUBA1A	SLC25A29	UQCRH	KRT6A	SGO1	LINC01639	CCL28	JMJD6	DRAIC	MB	OLFM4	PGGHG	SLC1A7	SIGLEC11	CYP4X1	SEMA4C	CFLAR	FREM2	SLC22A18	JAK2	NPC1	APRT	PLAC8	RHOA	DDT	ROBO2	GATA3
84	AL929091.1	SAP25	GSTK1	ERO1B	LMO7	SIK2	RBM15B	HIST1H2AL	ARPC1B	ITGA8	PRELID1	SCN5A	CD81	USP5	AL138724.1	PDCD1LG2	AL589935.1	RFPL2	JAK3	CAMK2A	DNAJC5B	MIXL1	RUNDC3A	RPL27A	FBXO32	CCNF	AC004784.1	SCNN1B	CD83	LINC01927	SPDEF	LAMB3	SLC52A3	TMEM236	AC091965.1	FOSL1	CACNG4	CEACAM5	SP8	MYO1A	SDC4	HIST1H2BO	S100A6	AC022893.1	MICOS10	RPS27	GLYATL3	AC207130.1
85	MARCH2	GNG10	CYP27A1	LINC01014	PLIN3	SLC4A2	HAGLROS	ZNF367	MEA1	IGHV4-34	SDCBP	TMEM108	GAA	NUDT16L1	IRF4	ATP6V1C1	ARHGDIG	GUCY1B1	CERS3	NDUFB5	ZDBF2	SRGN	LINC02823	PSME1	CSTB	PIMREG	MORN3	MGLL	HSPA8	SH3RF3	COLCA2	ITGA2	FKBP10	CYBRD1	GPC3	ZNF581	SLC18A3	RNF213	AP002754.1	CTSZ	TNFRSF6B	MINCR	CA2	CARD16	LSM5	CTSH	HOXD11	LINC01895
86	CCNDBP1	DLX2	GFER	SSTR5-AS1	CGB5	CADM2	COL4A1	SPC25	PTP4A3	RAC2	AC126544.2	CALCA	CLUL1	APOD	FP236383.3	PTGIS	AC096537.1	NPW	GPR25	PCOLCE	AC027682.6	LINC02609	SLC29A4	EIF3F	RAB9A	MAD2L1	AL589743.4	LINC00365	LDLR	QDPR	HES2	GOLM1	LINC01738	ERICH4	AL031726.1	KRT80	IGF2BP1	CTSL	FAM182B	CBR1	CD74	TOM1	HAGHL	PRR15L	BZW2	TMEM258	ZNF385B	SLC12A3
87	AC004477.1	USP44	TMEM25	BAALC	PHLDA2	LDHB	DPEP1	FANCA	GAL3ST4	AL135924.2	SERPINA4	LINC01484	NAAA	ATP6V0E2	BRAF	AP000763.4	NR2F2	MORN5	PCOLCE2	PTGIS	KLRC2	FCGR2B	TM4SF4	RPS27	S100A12	RAD21	ZNF679	P3H2	TOB1	C1orf127	AC113143.3	HLA-DQA2	FGF12-AS2	AQP7	PREX1	AL390774.2	LOXL2	CPM	NKD1	OTC	DEFB4A	ERVK3-1	CTSE	NBPF26	LDHA	RPS2	FGF19	PLAC9
88	ALG10	LINC01375	PSME2	ELAVL4	TMEM265	TPD52L1	TMPRSS13	HIST1H3H	HOXA13	MYO1G	AC010967.1	DIRC3-AS1	ID2	FAM149B1	MYCBPAP	MIR100HG	LRRC17	GABBR2	ITPRIP-AS1	CCDC65	LINC01967	AC006064.2	MDK	ESRRA	HSPB8	ARHGEF39	FAXC	ABLIM1	CDKN1C	LINC00261	ABCA4	AQP3	AC005021.1	ACHE	CKB	AC089985.1	TNNT3	IL1RN	AC138696.2	PDZD3	SOD2	MRPL20	SH3BGRL3	PDE3A	PSMA4	ATP5F1E	TMEM47	JPH2
89	NLRX1	AC122710.1	APOC2	MARCH4	CD63	FILIP1L	NENF	BRCA2	GLO1	DOCK2	MGAT4B	CHST2	PTPRZ1	PLOD2	CTHRC1	HPCAL1	NIBAN1	SCN3A	IL1R1	FKBP11	ZNF804A	TSPAN32	DBN1	RPL22	AP001347.1	REEP4	AC073578.1	PSD3	AC023157.3	PYY	AC103957.2	ENO2	AC099314.1	GIP	LINC01917	AC003087.1	RHOBTB3	AC027045.2	RAMP2-AS1	PMP22	AC109460.4	AC138466.3	POLD4	PROX1-AS1	SNRPG	UQCC2	CES1	GAS7
90	FAM153CP	CTAG2	SLC25A37	NAP1L3	CLDN7	HPN	SLIT1	CDC25A	B4GALT1	MAP4K1	COX7C	NRG3	HTRA1	AL023553.1	MUC12	APOE	GABARAP	VWA5B2	GLIPR1	MXRA8	PLAAT5	CADM1	RTBDN	AQP1	MXD1	MIS18BP1	AC008517.1	RALGPS2	CDKN1A	MS4A15	AL138902.1	NPDC1	MXRA8	PCK1	ZNF385B	RPL3	FAM178B	CD9	C5orf66	MISP	HLA-A	RMC1	LIMA1	GSN	TOMM5	RPL11	ZNF280A	DPPA2
91	PITPNC1	E2F5	MS4A18	COL22A1	BZW1	ALDH1A1	GPX3	E2F8	EDNRB	AP003469.4	S100A14	TLR9	LAMP2	RHOQ	ZIK1	DNAH11	ZBTB16	RAPGEF4	CTNNA2	TNNT1	UBE2E2	ANKDD1A	F10	RPL39	SASH1	SPC25	TUBB3	ADGRF1	UBB	AL096854.1	CDH11	SHC2	CXCL1	GLRX	ECI2	ZIC2	LAMC1	PLAUR	C2CD4D-AS1	CIDEB	STAT2	RPL28	NDUFB2	MT1M	RPS17	DANCR	TMPRSS11E	CCDC80
92	PRR22	TRO	MOGAT3	SYT4	TNFRSF12A	UBE2QL1	FOLR3	RANBP1	ASCL2	USP51	CTSB	NMU	CGREF1	GBE1	AC090469.1	CPVL	HPN	AL032819.3	SP5	AC024230.1	LINC01205	IGHV3-69-1	LRTM1	FTH1	GZF1	CIT	TAC1	SMIM14	NUFIP2	AL136528.1	SELENOM	CAPN12	TNFAIP3	TMPRSS15	DIRC3	NFATC1	COL5A2	KIFC3	GABRB1	ACY1	BNIP5	SNRPD2	CTSA	AOC1	SNRPC	RPL15	CD1D	FLNA
93	CNFN	LGALS1	CST3	GUCY1A2	ETS2	GRIA4	SYN3	NSD2	METTL26	APOBEC3B	CHCHD10	AC007497.1	FKBP11	KCNU1	PPP1R16B	AC110619.1	AC061975.1	MIR670HG	AL135818.1	AL359644.1	CECR2	RASGRP3	ASCL1	AIG1	NDRG2	ECT2	TCEAL7	FMN1	CXCL3	GPC5-AS1	AL138701.2	MKNK2	LINC01942	CIDEC	APOBEC2	IMPDH2	NLRP7	HK2	AC188616.1	KHK	HLA-DMB	AC010531.6	NDUFS7	CCNG2	SERBP1	DPM3	TCHHL1	SLC39A1
94	NECTIN3-AS1	MYT1L	SLC37A4	SMIM41	LMTK3	LAMB4	GUCY1A1	HIST2H2AB	SLPI	ATP6V1G2	COX6C	LINC02122	CPD	NIPSNAP1	NR4A2	AL121827.2	NUCB2	RGS17	ITGB2	SLC16A4	SLC12A4	JSRP1	TSPAN7	EBPL	CCDC69	CDC25B	GRID1	VSIR	ADM	SMIM41	ASPH	ACTN1	AC253572.2	ASAH2	MITF	PNRC1	SERPINB9	CXCL5	GAD1	MT1M	ADAR	CR1L	ANXA4	OR2A7	MRPL13	MIA	AC231759.2	L1CAM
95	PAQR5	Z99943.1	FAM234A	LINC01927	COL17A1	DUSP19	PRSS23	TIMELESS	RAB25	TRPV2	ACMSD	TECTA	TMPRSS3	LYPLA2	AL731702.1	ATG9B	GLUL	BAALC	PHYHIPL	COL6A2	TDRD9	MEI1	KRTAP5-5	IDH3B	CHI3L2	TMPO	BNC1	MLPH	TAF4B	NPY1R	CRACR2A	C4orf3	APOL1	SULT1A1	ITPRIP	PABPC1	MYCT1	AC138304.1	TMEM63C	XPNPEP2	ZNFX1	PSMA7	CIAO2B	ITM2C	TALDO1	CYB5A	LINC01260	TUBB2B
96	LINC00672	RASSF2	ATP5MPL	KCNK17	ARPC1A	MPC1	AMACR	CHEK1	EFNA3	CELF2	GSPT2	AC096645.1	LRMDA	AC008641.1	AC092053.4	CEBPB	GSTM3	APLP1	PGM5	PAH	TCF7L1	AC005041.4	MANEAL	LETMD1	ARHGEF26-AS1	HP1BP3	AC011632.1	GIPR	CCN1	SCAMP5	RPL13	AC079163.2	AC080023.1	KIFC3	ESRRB	MARCKSL1	AC110619.1	AC023202.1	RBP1	SLC26A3	DUOX2	COPS9	RALBP1	VSIR	HNRNPK	HIGD2A	ABCC9	MYH15
97	TLR5	CFL2	DDT	DEPP1	MET	SULT2A1	CA8	TUBG1	FDPS	POU2AF1	AC107027.3	MATK	SLC39A8	FRAS1	GYPC	AC051635.1	AC087392.1	SPTBN4	GABRR1	HOGA1	AC078881.1	LINC01014	C2CD4B	RPL31	ABLIM3	LBR	CD79B	SLC7A8	NXF1	NR0B2	KRTAP4-1	SERPINB1	C4BPA	TM4SF20	AL121990.1	CHMP1B	AC073210.3	OVAAL	DLGAP1	C1orf115	BST2	METTL26	REG4	ONECUT2	MRPL36	AGR2	GDNF	NSG1
98	TMEM65	TDRP	CASP1	YPEL4	NPSR1	REXO2	TSPAN18	RBL1	SMIM29	ACAP1	UQCRB	AL109809.5	PRDX4	DPY30	BRSK1	AL590644.1	TENT5C	LMCD1	BMP5	LINC00479	AC027601.2	PTPRCAP	ERV3-1	PKDCC	EPHX3	DBF4	CFHR3	CACFD1	PER2	LINC01586	RPL30	TMEM163	RGS7	SSUH2	MPC1	ACSM3	AIF1L	OCLN	ANKRD34B	LGALS3	HLA-DQA1	RAD51C	MGLL	ATP8B4	SSR3	IFI27L2	ADAMTS10	TUBB6
99	BRICD5	LAYN	EPHX2	LINC01152	RAB10	EIF5A2	AP000757.1	MELK	TNNC2	AL929091.1	AC022087.1	LINC01231	ARHGDIG	PLS3	TXNDC5	AC006398.1	EPHA5	CACNB2	FLI1	ADGRD1	NRSN2	HUS1B	AL450311.1	POU6F2	AP000424.1	BORA	AC114971.1	APOL1	DEDD2	MYH4	AL353693.1	SEMA4B	CA4	SLC26A3	TPD52L1	AC011611.3	TINCR	KLK10	ELN	FMO5	HLA-DRB1	CCDC124	AURKAIP1	GUCY2C	UCHL3	NOP53	RASSF8-AS1	ZFP57

## Sheet: Epithelial_normal
	pEpi1_N	pEpi2_N	pEpi3_N	pEpi4_N	pEpi5_N	contaminant	contaminant	pEpi8_N	pEpi9_N	pEpi10_N	pEpi11_N	pEpi12_N	pEpi13_N	pEpi14_N	pEpi15_N	pEpi16_N	pEpi17_N	pEpi18_N
0	APOC3	PGA3	MAGI1	ACSL1	RPS18	COL15A1	S100A9	HMGB2	S100A2	HSPA1B	TFF1	ATP4B	SV2C	LYZ	GSTA1	SCG5	TMEM147	REG4
1	APOA4	PGC	MECOM	TMEM132C	RPL12	COL6A2	SPRR3	UBE2C	LY6D	NR4A1	S100P	ATP4A	SLC18A2	ZG16B	CBR1	PCSK1N	GLIPR1	CEACAM6
2	APOA1	LIPF	CDK14	PDE8B	RPL32	DCN	CSTB	TOP2A	KRT5	PPP1R15A	GKN2	MFSD4A	CHGA	AQP5	GSTA2	CPE	KRT7	S100A6
3	AQP10	CXCL17	CHRM3	AP002518.2	RPL36	COL1A2	S100A8	NUSAP1	DAPL1	HSPA1A	CA2	CKB	HDC	MUC6	MGST3	QPCT	PRMT1	TSPAN1
4	ENPP7	GPER1	FNDC3B	AC012494.1	RPS15A	PTGDS	CRNN	CCNB1	AQP3	DNAJB1	GKN1	KCNE2	RAB3C	LINC02688	RBP2	PAX6	KRT18	HPGD
5	C8G	AZGP1	DDR2	AL591501.1	RPS12	SPARC	SPRR1A	MKI67	FABP5	JUN	MUCL3	SLC25A4	GFRA3	C6orf58	FABP1	AC055839.2	GAL	CEACAM5
6	SLC15A1	PGA4	PDE4C	LINC01811	RPL36A	DPT	SLURP2	PTTG1	DSC3	FOSB	VSIG1	CBLIF	NRG1	SERPINA3	KHK	PCSK2	RPS5	LINC02826
7	PRAP1	PLTP	PDE4D	NSG2	RPL13	MFAP4	CYSRT1	PLK1	ADH7	EGR1	CLDN18	CLIC6	MAOB	A4GNT	PEBP1	CLTRN	TOMM40	MUC3A
8	CYP2D6	NUCB2	ZSWIM6	GHRL	RPS8	A2M	CSTA	TPX2	PKP1	ATF3	MUC5AC	IDH2	PAPPA2	FMOD	TKFC	CALY	FTL	MGLL
9	CDA	LEPR	LARGE1	NPAS3	RPS23	PDGFRA	SLURP1	CDC20	CLCA2	JUNB	CAPN8	GPR155	RBPJL	CLU	HSD17B2	SUCNR1	EXOSC5	FXYD3
10	C3orf85	PDILT	NAALADL2	AC084361.1	RPL26	LAMA4	TGM3	CENPF	DSG3	FOS	TFF2	KCNQ1	LHX5-AS1	CLDN2	PTGR1	GAST	C19orf48	PLA2G10
11	ALPI	PGA5	LAMA2	SRRM4	RPS21	SPARCL1	MUC21	ASPM	GBP6	HSPH1	NKX6-2	NDUFA4	DACH2	AC020656.1	PCK2	CES1	SPINT2	MDK
12	SLC46A1	CHIA	LRRC23	MBOAT4	RPS15	MMP2	SBSN	CCNB2	LGALS7B	ZFP36	ALDH3A1	TRIM50	AC092957.1	LTF	HEBP1	PAM	RPL8	PHGR1
13	SELENOP	C5orf38	LINC00910	CNTN4-AS2	RPS14	CXCL12	TGM1	CDKN3	LYPD3	DUSP1	RNASE1	CPA2	FGF14	MIA	SLC51B	SCGB2A1	CYC1	KRT20
14	TM4SF20	PAIP2B	LINC01876	AL592043.1	RPL29	FBLN1	NDUFA4L2	TUBA1B	TRIM29	IER2	TAGLN2	LINC00671	STXBP5L	LDB2	FBP1	HAP1	SLC27A5	TMEM54
15	PMP22	SSR4	AL078604.4	AC079117.1	RPL34	VCAN	CNFN	HMMR	KRT13	DNAJA1	SPTSSB	FXYD4	ITGBL1	C16orf89	MTTP	SCG3	GPI	GSN
16	IL32	NUPR1	FGF13	AC117435.1	RPS24	PLVAP	MAL	BIRC5	CRABP2	BAG3	SOSTDC1	PXMP2	KCNH7	SELENOM	AADAC	KCNK16	HMGA1	POLD4
17	GCHFR	PRDX4	ZBTB20	LINC02112	RPS2	COL3A1	CRCT1	CCNA2	ANXA8L1	IER3	BCAS1	SLC4A2	ERP27	LCN2	UGT2A3	SHISAL2B	OLFM2	TSPAN3
18	HLA-DRA	C16orf89	PTPRK	GPC5-AS2	RPS28	CD34	IVL	CDK1	PTN	HBEGF	LGALS9B	ATP1B1	FAM171B	NPDC1	OAT	SCGN	BAX	PLAAT2
19	SERPINA1	SBSPON	C4orf47	AC099788.1	RPL37	PLAC9	ALOX12	PRC1	PERP	UBC	RFLNA	GLUL	PDZRN3	PRR4	ATP1A1	TSPAN2	MRPS12	SH3BGRL3
20	APOB	GAMT	TMTC2	AC016650.1	RPL35A	COL5A1	SPRR2A	AURKB	LGALS7	MCL1	PSAPL1	RAP1GAP	LHX5	SPDEF	PEPD	MAP1B	PSMD8	TIMP2
21	ACY3	TMED6	KCTD8	GPR119	RPL31	TMEM119	S100A12	KPNA2	PITX1	HSP90AA1	ANXA10	G0S2	RIMS2	VWA1	CHP2	TAGLN3	C1QBP	CAMK2N1
22	HLA-DRB1	PDIA2	FUT9	NNMT	RPL18A	CXCL14	NCCRP1	CENPW	RHCG	ANKRD37	SLC5A5	MPC1	IFI6	GOLM1	CRYL1	PRKAR2B	SPCS1	TPM1
23	CYP3A4	FKBP11	CATSPERB	DIRAS2	RPL41	FLT1	ANXA1	CENPA	TACSTD2	NFKBIA	LINC01133	SLC2A12	CDHR3	CREB3L4	PIGR	CACNA1A	HSPBP1	IFI27
24	CIDEB	UGT2B15	TESK2	GDAP1L1	RPLP1	ISLR	SULT2B1	TUBB	AC019349.1	CCN1	SPINK1	AQP4	DTNA	BPIFB1	SI	DNAJC12	THEM6	GCNT3
25	GLRX	NBPF12	KIAA0319	LRRTM4	RPL28	APOD	SPRR1B	CKS2	MIR205HG	RHOB	SYTL2	CYFIP2	FAM163A	WFDC2	ANXA13	TMEM190	RBPMS	MUC17
26	DPEP1	DCXR	RFX2	AGBL4	RPL35	ABCA8	CLIC3	GTSE1	SOX15	GADD45B	MUC1	HRH2	KCNK3	FAM3D	CES2	SSTR2	AP2S1	AOC1
27	CREB3L3	MT1F	PPP3CC	KIRREL3	RPS3	PECAM1	EPGN	TROAP	CAPNS2	PMAIP1	AKR1B10	REXO2	PTF1A	TESC	DGAT1	ERO1B	CFD	PLAC8
28	SAT2	SEC62	TEX14	GPC5	RPL22	PPP1R14A	IGFL1	KIFC1	CALML3	BTG2	TESC	COX7A2	NALCN	TFF2	MAOA	TUSC3	KDELR1	VILL
29	SUSD2	IGFALS	LINC01619	LINC02440	RPS27	RAMP3	DYNAP	CENPE	FAT2	NRARP	KLF2	IGFBP2	KCNB2	ETV5	FABP2	PDK3	SRM	EFHD2
30	ENPEP	GNMT	CCDC200	SNTG1	RPS13	CALD1	SPINK7	KIF23	RHOV	CITED2	NQO1	SERPINA5	CDH6	CFB	GSTM4	CHGB	PKM	C19orf33
31	C2orf88	RARRES2	KANSL1L	GALNT17	RPL39	EMILIN1	TMEM40	STMN1	TP63	JUND	REP15	LDHB	NLGN1	AC025154.2	VIL1	SCG2	RPL7	PRSS3
32	AQP11	HERPUD1	POU2F2	CACNA1B	RPL30	GNG11	IL1RN	CEP55	ZNF750	SOCS3	ANKRD36C	DUSP4	INSRR	DCHS2	REEP6	MS4A8	FXYD5	RHOC
33	UGT1A1	PHGDH	FBXL18	SLC5A8	RPS19	LGALS1	PRSS27	CDCA8	VSNL1	ZFAND2A	LINC00342	PSCA	ST18	CXCL2	DHRS11	NKX6-3	RPL18	MUC13
34	ENPP3	CA9	AL691403.1	SNAP25	RPL11	COL4A1	SERPINB3	HMGN2	NOTCH3	SERTAD1	FAM177B	PSAP	CACNB2	THBS1	KRT20	C1orf127	NME1	TM4SF4
35	AQP7	B3GAT1	LINC01331	FAM135B	RPL17	SERPINF1	CALML3	DLGAP5	NSG1	MAFF	RASEF	CYB5R1	CCKBR	AGR2	AKR1B10	CASR	FBL	MALL
36	DHDH	CCKAR	HOMER1	CFC1	RPLP2	VWF	KRT4	DTYMK	SFN	HSPA6	AGR2	SLC16A7	AL139815.1	CGREF1	ACSL5	FEV	TRIM28	MT1H
37	CIDEC	LRRC26	BTK	NKX2-2	EEF1B2	PLAT	KRT6B	ANLN	KRT15	CSRNP1	BICDL1	UQCRB	GALNT13	ANXA5	SLC51A	TUBA1A	LSR	GRN
38	AP006216.3	MT1G	LINC01004	STMN2	RPL10A	EDIL3	S100A14	TACC3	CSRP2	KLF4	DDX60	ISCU	DOK6	SRARP	CALM1	KCNT2	RUVBL2	CCDC68
39	CDHR2	SCUBE2	LINGO2	PTPRT	RPS9	TCF21	CALB2	KIF2C	GJA1	H3F3B	CTSE	DNER	MTUS2	TMPRSS3	SMIM24	VGF	SELENOW	MT2A
40	TM4SF5	LINC00261	PNLDC1	MMRN1	RPL19	ADGRL4	SPRR2B	DEPDC1	CD9	DNAJB4	CAPN9	PTGER3	KLK11	LINC00632	SLC35G1	AK5	RABAC1	COL17A1
41	SECTM1	CIRBP	CDKL3	LY6H	RPS25	LUM	TPRG1	RRM2	CLEC2B	BRD2	SOX21	FRMD1	HTRA1	COLGALT2	SLC37A4	PEMT	PHB	CDHR2
42	CYP4F2	AF131216.3	ROR1	SMOC1	RPL24	MGP	KLK13	HMGB1	HSPB1	DNAJA4	OASL	PRSS23	SDK1	CTSF	CFL1	MIR7-3HG	TIMM50	ADH4
43	MPP1	XBP1	ARIH1	VSTM2L	RPL7A	CYGB	KRT6A	H2AFZ	SERPINB13	HSPA8	LGALS9C	GABARAPL1	SAMD3	CD74	SLC39A5	HMGCLL1	ETHE1	IL2RG
44	ADIRF	SERP1	SEMA4A	PPP1R1A	RPL37A	CALCRL	IGFL2-AS1	KIF20B	SPINK5	HSPA2	MLPH	UQCRQ	ANO3	CAPN6	GNA11	NKX2-2	HAGHL	QSOX1
45	SLC2A5	MT1X	SNTB1	BHMT	RPL14	VIM	HOPX	MAD2L1	FGFBP1	BCL3	TMSB4X	TM7SF2	TAFA5	FAIM2	MME	RFX6	EIF3H	LINC02404
46	SSUH2	MT2A	TEAD1	WNK3	RPS27A	EPHA3	CAPN14	CKAP2	A2ML1	KLF6	ATP2A3	TPD52L1	DPP6	COL11A2	MYO1A	FFAR1	EIF3K	MUC1
47	MGAM	TENT5C	FHIT	INA	RACK1	AEBP1	AC019349.1	SMC4	DEFB1	HSP90AB1	SMIM6	RBPMS2	UNC79	HPN	SLC5A1	GNG2	MRPL13	CHST5
48	B2M	DERL3	HS3ST4	AF279873.3	FAU	FBLN5	HCG22	BUB1	FRMD6	ZC3H12A	VSIG2	TBC1D14	AC008852.1	HLA-DPB1	CYP27A1	LINC01829	UPK3B	SLPI
49	RNF186	SEC61B	INTS6	S100A1	RPL10	FXYD6	ASPG	TUBA1C	TP53AIP1	MYLIP	UPK1B	ATP5F1A	AC109466.1	CST3	SUCLG1	TAAR1	ECH1	MALAT1
50	ALDOB	PTP4A3	SORBS1	SYT4	RPS6	EMCN	CIDEA	NEK2	RGMA	FOSL1	UNC5B-AS1	EIF5A2	CLSTN2	NOTUM	CYBRD1	C12orf75	BOP1	CTSE
51	HLA-C	LINC02381	LRMDA	RBP1	RPL23A	KLHL4	KRT13	TUBB4B	KRT16	RASD1	ABCC5	RAB11FIP2	SCG3	CD81	GPD1	SOGA3	CD81	MMP28
52	SLC7A7	MT1E	SMIM41	RTN1	RPS7	CLEC3B	KRTDAP	KIF11	THBD	EIF4A3	ABLIM1	KIAA1191	ADGRV1	CXCL3	HADHA	PTPRN	NPM1	MT1M
53	ERICH4	BHLHA15	AL356124.1	AC079760.1	RPS3A	CFH	SCEL	ARHGAP11A	IL20RB	BTG1	CYSTM1	VEGFB	KIRREL2	SNCA	XDH	NEUROD1	PPP2R1A	HIST1H1C
54	SLC28A1	GSTA4	CEMIP2	SNAP25-AS1	RPL13A	RAMP2	TMPRSS11B	PCLAF	EMP1	EGR2	IL1R2	CKMT2	CNTN4	TMEM98	PSME2	CRMP1	KLK10	GPA33
55	MDK	RNLS	SIK3	NR4A3	RPL27A	CYYR1	GJB2	RACGAP1	ANXA1	PLK2	RAB27A	AC108488.1	BEX1	SEZ6L2	SULT1A1	GPR142	PPA1	ENTPD8
56	SULT1A2	SCTR	GPRC5D-AS1	VWA5B2	RPL21	FENDRR	GLTP	NDC80	GPNMB	GEM	SLPI	PRDM16-DT	KHDRBS2	NUCB2	CYB5A	VWA5B2	PUF60	ACHE
57	ADA	BNIP3	AC005355.1	SLC16A12	SNHG29	HAPLN1	RHCG	LMNB1	DSP	CCNL1	FER1L6	LIFR	CAMK2B	HLA-DMA	METTL7B	GNG4	NHP2	GPT
58	LEAP2	POPDC3	QKI	SLC8A1	RPL3	SCARA5	GJB6	NCAPG	KRT6B	DUSP2	EPS8L1	POU6F2-AS1	VSTM2L	SERTAD4-AS1	DDC	CD52	MRPL15	LRP10
59	ACE	IRX3	LINGO1	AOX1	RPL15	COL1A1	TMPRSS11E	SGO2	TINCR	PPP1R10	TRNP1	SIGLEC11	NOVA1	SERPINA4	CDH17	DIRAS3	UBE2M	KRT19
60	SLC6A19	DUOX1	TRIM72	SUSD5	RPL27	LTBP2	SERPINB11	KIF20A	SERPINB2	NFKBIZ	SULT1C2	AC116407.1	KIF1A	BACE2	TMEM253	ELAVL4	GSTP1	TRIM31
61	SLC5A1	NR2F2	FOXP1	MARCH11	RPS29	TMEM100	ENDOU	CKS1B	BBOX1	IFRD1	SGSM3	FNDC5	P2RY14	DBR1	LGALS3	KCTD12	TUFM	SHD
62	TREH	CELA3B	CACNG7	DSCAML1	RPLP0	CCL11	S100A11	HJURP	TXN	ZFAND5	TCEAL9	SCPEP1	CERS4	CD44	ACY1	INSM1	AHCY	TST
63	ACY1	VKORC1	AL157371.2	ROBO2	NACA	POSTN	S100A16	NUF2	KRT4	SNHG12	GALNT6	LRIG1	SLC38A3	KIAA1324	HAAO	KCNK17	EEF1D	CDHR5
64	XPNPEP2	PSAT1	RASGEF1B	TRPC4	RPL23	JAM2	FAM25A	PBK	ZNF385A	ETS2	FSIP2	PBXIP1	KSR2	REG3A	DNASE1	MYH10	MTDH	B3GALT5
65	S100G	GSTM3	EFNA5	PCSK1	RPL5	CDH11	UMLILO	TMPO	C10orf99	HEXIM1	GALE	ACAT1	PDE10A	ATP6V1G1	SLC2A2	BAIAP3	LAPTM4B	TSPAN8
66	FABP2	ACP5	AC244453.3	LINC01445	RPL9	ADAMTS5	ALDH3B2	KNL1	KLC3	ELF3	AL158206.1	NNT	PCBP3	HLA-DRB5	AKR1C3	SYT5	SYNGR2	LGALS3
67	AL365226.2	LRRC17	AC084816.1	AC012513.1	LSM7	EDNRB	C4orf3	KNSTRN	TMPRSS11A	NCOA7	LYPD6B	PRDX5	AKT3	TMEM45A	CLDN15	PCSK1	GAPDH	OAS1
68	PPP1R14D	IRX2	TTC6	NOL4L-DT	EEF1G	CLEC14A	ANXA8	NCAPD2	CERS3	CD83	B4GALNT3	ZNF710-AS1	SMOC1	STEAP1	OTC	SEZ6L	IMPDH2	SCNN1A
69	CD74	KRTCAP2	PCDH9	LMCD1	RPS4X	BHLHE22	KRT78	FOXM1	TMEM40	TNFAIP3	AKR1C2	NFE2L2	ECRG4	PDZK1IP1	SLC7A9	RTN1	PGK1	CRIP1
70	CDHR5	ACSM3	C7orf50	GC	GAS5	NPFFR2	AC106045.1	CDCA2	ALDH3B2	RSRP1	ANO1	APOBEC2	SLC2A14	TNFRSF19	ALDOB	LY6H	EIF4EBP1	MYO7B
71	GPX4	SEC11C	PIK3C2G	KIF5C	ZFAS1	MEF2C	AC121764.1	NCAPH	TUBB6	ERRFI1	FOXQ1	AKR7A3	PARVB	HLA-DPA1	GSTO1	SYT4	LY6E	ONECUT2
72	ISG20	PLPP5	MCU	ANKS1B	RPL38	KDR	AC073210.3	ARL6IP1	S100A11	CD55	LIME1	GHITM	SLC44A5	PDIA2	EPHX2	TMOD1	GPX2	SMIM31
73	HLA-B	GPRC5C	NAV3	FBN1	RPL6	BARX1	PAX1	AURKA	KEL	ZFP36L1	FA2H	SLC25A5	GABRA1	PDIA5	SLC22A18	UCN3	ANXA2	MT1G
74	CEACAM20	FMOD	SLC8A2	KLHL1	NME2	MXRA8	SPINK8	TTK	RND3	ACTG1	AKAP13	GPC3	MAGI2	TFPT	MOGAT2	CNIH2	TBCB	CCL28
75	PLAAT4	SSR3	PRKCG	SERPINA10	RPL18	COL12A1	KRT6C	KIF14	SERPINB5	CBX4	RAB27B	ALDH1A1	GABBR2	KANK4	SLC13A2	PDK4	CCT3	MYO15B
76	HLA-A	REEP5	SLC26A3	ZNF331	UBA52	CD93	DIO2	KIF4A	KCNK7	NR4A2	GPX2	OXCT1	CAVIN3	SOX9	PPP1R16A	CELF3	UQCRFS1	MISP
77	NAALADL1	SLC9A3R2	AC106897.1	CDK5R2	SLC25A6	RCSD1	PADI1	PIF1	LINC00958	KDM6B	CLIC3	COX7B	SLC35F3	CAPN12	SCP2	SYT1	PCBD1	LINC01559
78	NPC1L1	SPCS2	IQCN	AC104123.1	RPS11	ROBO4	CALML5	CKAP2L	C5orf66-AS1	TRIB1	AHNAK	BOLA3	CRTAC1	ITM2A	CALML4	SEC11C	SLCO1B3	FMO5
79	ASAH2	CRNDE	ARHGAP24	CACNB2	APRT	GGT5	FAM25C	ZWINT	CD109	SLC38A2	ANO7	TBCA	AC026774.1	REM1	BDH2	LINC02106	PPIA	SPATS2L
80	AL360169.3	HTR1E	MBNL2	SCGN	PFDN5	TIE1	SDR9C7	BUB1B	AC245041.2	ZFP36L2	CYP2S1	KCNJ16	PAK3	C3	TMEM256	PFN2	ATF7IP2	H2AFJ
81	SLC39A4	CLPTM1L	PLCB1	RGS17	RPS17	C1S	LY6G6C	KIF22	PGD	CXCL2	SFTA2	MRPL41	ANK2	TSPAN13	CMBL	CRYGD	STOML2	NMUR2
82	CD36	GABARAP	AP001922.5	EPHA5	TMEM238	HTRA3	SPRR2D	SGO1	AOPEP	ID2	BLVRB	GBGT1	FAM163B	CLDN10	KRT8	ISL1	PRDX1	MEP1A
83	ATP8B2	PDIA6	C1S	BGN	RPS16	CNRIP1	SPRR2E	GPSM2	MRC2	ADM	CCND1	SIK2	ECE2	SLPI	AC007877.1	VTN	AL136379.1	TFF3
84	MUC13	SRPRA	PARD6G-AS1	RAPGEF4	SNHG8	ECSCR	LINC01697	PSRC1	ANXA8	DDX5	PLXNB2	MDH1	RGS7	PTPRZ1	SULT1E1	KIAA0408	PABPC1	SERINC2
85	TMEM37	POU2AF1	IGF1R	PGAM2	NOP53	TRAV36DV7	CRABP2	IQGAP3	KLRG2	DNAJB6	P3H2	ATP5F1B	FAM78B	CADM1	IDH1	TIMP1	PAFAH1B3	CLDN7
86	MYO15B	CST3	PCCA	CADM2	RPS26	TWIST1	RAET1E	UBE2T	KRT6A	ODC1	TENT5A	SLC26A9	CTNND2	GP2	PYCARD	CRYBA2	EIF3E	SULT1A1
87	MME	CCPG1	LINC01090	SLC12A5	RPS4Y1	RBP7	LGALS7B	CKAP5	KLK8	IRF1	BASP1	CHST3	AC008687.4	MAGED1	ARPC1B	KIF1A	SLC52A2	HOXB7
88	FADS6	ATP6V1G1	AL358232.2	PTPRN	RPL22L1	ENG	CRISP3	SAPCD2	KRT6C	UBB	APOL1	PDHA1	DUSP26	C12orf57	LGALS4	RIIAD1	TSTA3	MSLN
89	ACE2	TMEM97	HS6ST3	KCNMA1	SNRPD2	SHANK3	CTNNBIP1	SPAG5	SLC39A2	MYADM	AMTN	ATP5MD	SLIT3	SUMF2	AGPAT2	NFASC	NDUFB9	SPPL2A
90	C11orf86	AC004982.2	ITGAM	EYA4	RPSA	ERG	IL1A	CENPM	DSG1-AS1	AREG	SLC44A2	CD59	SH3RF3	MPZL1	FCGRT	SYT11	EXOSC4	DSC2
91	GK	CRELD2	SAMD4A	SDK1	ATP5MC2	LIMS2	LINC02621	MYBL2	MPZL2	RND3	CTNNBL1	SYNGR1	GDAP1	ANKRD22	MTCH2	NSG2	EIF4A1	AC005550.2
92	ANPEP	TMEM59	AFF3	AL606534.2	RPL8	CAV1	KLK8	NUCKS1	GPR87	IER5	TFCP2L1	COX17	GUCY1A1	PDIA3	GSTK1	MAP6	DANCR	EPCAM
93	ANKRD9	PEBP4	AC091887.1	RIMS2	PTRHD1	AL133415.1	PITX1	H2AFV	GYPC	IER5L	AL627171.2	PALM2-AKAP2	FSTL4	CITED4	GLYCTK	AC004862.1	TRAP1	GPX3
94	SMLR1	ALDH1L2	CHST8	PDE10A	TRIM54	BICC1	DSG1-AS1	HMGB3	PAX9	PHLDA2	EEF1A2	ECHDC3	AC016642.1	NPC2	MALL	IDS	PRKDC	TIMP1
95	CYP2C9	NUPR2	GULP1	TMOD1	PPP1R1B	PLA2G5	FMO2	RAD21	ARHGAP23	EGR3	LAMB3	NDUFB2	RADIL	EPHB3	BTNL8	SPOCK3	PSMC4	HEPH
96	CDKN2B-AS1	SYTL1	UBE2H	ABCC9	RPL4	TM4SF18	EHD3	OIP5	GRHL3	TSC22D1	FAM20A	ATP5PF	KCND3	MSMB	MOGAT3	AL133343.2	NPSR1	ITM2C
97	RHOF	WDR86	JAZF1	AC013269.2	TOMM7	LHFPL6	SPINK5	CCNF	LINC02006	CLK1	OSBPL7	ETNPPL	PLD5	ST6GAL1	PDZK1	SYT7	ISOC2	SMIM22
98	TNFRSF1A	SLC1A2	AC105052.4	VWC2L	DNPH1	PODN	LINC00536	HIST1H4C	CA12	TENT5A	LGALS9	COX5A	FMN2	SHC2	MAP2K2	ARX	PLBD1	PDZD3
99	DNASE1	SPCS3	AC105052.5	AP001596.1	RAMP1	OLFML1	AC011407.1	TK1	ZNF185	CHORDC1	PKIB	C18orf32	JAM3	KCNN4	MGAT4B	RGS4	VDAC3	MXD1

## Sheet: Myeloid_B
	contaminant	pM2_B (shared, IL1)	pM3_B (shared, cDC)	pM4_B (shared, mast)	pM5_B (shared, neutrophil)	pM6_B (shared, pDC)	pM7_B (shared, proliferation)	pM8_B (shared, mregDC)	pM9_B (shared, C1Q macs)
0	SLC9B2	FTH1	COTL1	CPA3	IFITM2	LILRA4	MKI67	FSCN1	PLD3
1	CTSK	SOD2	HLA-DPA1	TPSB2	HCAR3	SCT	TYMS	LAMP3	CTSD
2	AK5	C15orf48	HLA-DPB1	TPSAB1	PLEK	CLIC3	STMN1	CCR7	C1QB
3	PKNOX2	ANXA5	HLA-DQB1	SLC18A2	HCAR2	CLEC4C	HMGB2	LAD1	C1QA
4	ZNF474	IL1B	CORO1A	VWA5A	PDE4B	LRRC26	CENPM	BIRC3	PSAP
5	COL27A1	CSTB	CPVL	MS4A2	G0S2	TCF4	TPX2	TXN	CD68
6	LINC02725	CD44	NRARP	TPSD1	SOCS3	SHD	BIRC5	NUB1	LGMN
7	SPARC	FLT1	HLA-DRA	HDC	IFITM1	MZB1	RRM2	ANXA6	C1QC
8	HSPB7	SERPINA1	CD74	HPGDS	ZFP36	TSPAN13	NUSAP1	LY75	FCGRT
9	TCIRG1	CCL3	JAML	KIT	AQP9	PTPRS	CDK1	EBI3	ASAH1
10	JDP2	IL1A	HLA-DRB1	CLU	OSM	TLR9	TUBB	CD200	CTSC
11	CREG2	INHBA	RPL18A	LTC4S	PROK2	IRF7	H2AFZ	TBC1D4	CTSB
12	RBAKDN	TIMP1	SAMHD1	IL1RL1	AC015912.3	SMPD3	PCLAF	RAB9A	APOE
13	RUFY4	CXCL3	HLA-DQA1	GATA2	CSF3R	CXCR3	TOP2A	CRIP1	CTSA
14	REM1	TNIP1	RPS3A	BACE2	TAGAP	GZMB	CKS1B	CCL22	CREG1
15	ACP5	CCL20	EEF1B2	SLC24A3	FCGR3B	ZFAT	UBE2C	IDO1	CTSZ
16	TNFRSF11A	AK4	RPS18	MAOB	LCP2	SLC15A4	HMGN2	IL32	PLA2G7
17	DGKI	NINJ1	RPL8	SIGLEC6	RHOH	PACSIN1	TK1	GRSF1	GPNMB
18	AC092484.1	S100A10	RPS14	RHEX	NAMPT	DRD4	FOXM1	SINHCAF	LIPA
19	HYAL1	ATP13A3	CST3	MLPH	ACSL1	TRAF4	AURKB	SYNPO	CD81
20	ANKH	TNIP3	RPL19	PTGS1	IVNS1ABP	PPP1R14B	ZWINT	MARCKSL1	TIMP2
21	SLC37A2	SLC11A1	RPS23	AL157895.1	PPIF	TPM2	CCNA2	KIF2A	GRN
22	DPP4	CLEC5A	LGALS2	ATP6V0A2	CMTM2	LIME1	TUBA1B	GPR157	TMEM176B
23	AKAP6	GSTO1	RPS13	LAT	FPR2	IRF4	HMGB1	KDM2B	FTL
24	KIAA0040	FLNA	RPS6	RAB27B	S100A8	C12orf75	PRC1	DAPP1	NPC2
25	COL5A1	BNIP3	NAPSA	ANXA1	GCA	MAP1A	PKMYT1	LSP1	C2
26	DNM1	PLIN2	RPS5	SLC45A3	AC005050.3	DERL3	TMEM106C	CCL19	TYROBP
27	IGFBP6	IRAK2	CD1C	ADRB2	AC007032.1	NIBAN3	ASPM	RFTN1	MS4A4A
28	RAI14	TNFRSF1B	RPS24	GRAP2	ALPL	IL3RA	GTSE1	ALDH2	CTSS
29	SUCNR1	PID1	RPL10A	RGS13	CXCR2	APP	DTYMK	ACHE	ITM2B
30	WWC1	RAB13	RPL3	NTRK1	TRIB1	PTCRA	CDCA3	ANKRD33B	A2M
31	HTRA3	C1orf122	HLA-DRB5	CD69	SELL	TCL1A	UBE2T	TVP23A	SLCO2B1
32	RAP1GAP	SDC2	PTP4A2	ACSL4	PLAU	SPIB	TMPO	RAMP1	MS4A7
33	PICART1	CCL3L1	RPL26	NR4A1	AC023157.3	ITM2C	CENPF	NDE1	TSPAN4
34	AL353795.2	ALDOA	ARPC1B	LAX1	FFAR2	PTGDS	CCNB2	IL15	HEXA
35	AC060234.3	GAPDH	RPL4	ITM2A	MNDA	KRT5	CDC20	FNBP1	LAMP1
36	VPS33B-DT	PDE4DIP	RPS19	RAC2	PFKFB3	SEL1L3	ANLN	TRIP10	GLMP
37	AL603832.1	ANPEP	BTF3	FOSB	LUCAT1	WNT10A	CEP55	CDKN1A	SCARB2
38	RIMBP3	BCAT1	PKIB	SMYD3	S100P	EGLN3	GGH	SYNGR2	DAB2
39	PAGE2	TNFAIP6	RPS7	CD82	LINC01001	AC007381.1	H2AFV	CD70	FOLR2
40	CRMP1	BNIP3L	RPLP0	GCSAML	SAT1	VASH2	MAD2L1	LIMCH1	RNF130
41	AC073651.1	DRAM1	RPS4X	TNIK	S100A9	PLD4	NCAPH	CST7	IFI30
42	MYO1B	CCL4	RPL13	LEO1	TREM1	LDLRAD4	CDKN3	STK4	TREM2
43	EHD2	EREG	RPS16	KLRG1	IL1RN	SCAMP5	KIF2C	HMSD	APOC1
44	THOP1	NDRG1	RPS8	RHOBTB3	FPR1	PHEX	KNL1	TRAFD1	PLTP
45	FNBP1L	UPP1	RPS15A	DLC1	NEAT1	PLXNA4	ESCO2	CLIC2	TCN2
46	NDUFS8	C4orf3	RPL11	SKAP1	CDA	RAB11FIP1	NCAPG	RASSF4	HEXB
47	GPR68	PNRC1	RPL29	MAST4	ADGRG3	NR3C1	FEN1	CERS6	BRI3
48	CRABP2	MTF1	CLEC10A	TESPA1	IFITM3	SLC32A1	KIF11	SLCO5A1	NPL
49	VWA1	PLAUR	RPL28	STXBP6	AC026333.3	SEC61B	CCNB1	POGLUT1	CD163
50	MAP1A	CXCL8	RPS2	ARHGEF6	IFIT2	SLA2	HMMR	DUSP5	SLC40A1
51	SP6	FNDC3B	CNN2	PPP1R15A	LITAF	TTC24	DHFR	TSPAN33	PRDX1
52	NFATC1	WTAP	RPL15	SYTL2	VNN2	AC097375.1	DUT	GCSAM	CD63
53	PKN3	CXCL2	RPL32	LIF	VPS9D1	AEBP1	PLK1	SIAH2	TMEM176A
54	IGSF21	SLAMF9	EEF1G	NDFIP2	VNN3	FCHSD2	MYBL2	RAB30	ABHD12
55	MMP9	SLC39A8	FAM110A	FOXP1	TRIM25	OPN3	ASF1B	CD86	TMEM37
56	STEAP1	CD300E	RPS3	AHR	MX2	EPHB1	NCAPD2	RAB8B	CFD
57	RGS10	SLC7A11	HIC1	NFKBIZ	BCL2A1	PTPRCAP	CARHSP1	PLEKHG1	ATP6V0C
58	ITGB3	CD48	ASB2	INTS6	RSAD2	KCNK10	SMC2	MAP3K14	DNASE2
59	AC005041.3	SLC25A37	RPS12	WASHC1	ADM	CPLX1	UHRF1	MGLL	ADAMDEC1
60	AL133367.1	CLEC4E	RPS9	PALM2-AKAP2	LIMK2	POLB	NUF2	CSF2RA	MFSD1
61	FAM20C	MIF	ACTG1	IDS	PELI1	CCDC50	CENPW	EEF1A1	AKR1A1
62	SLC4A2	GK	RPS15	TENT5A	TMEM71	MYMX	DIAPH3	RHOF	MSR1
63	SYNGR4	KYNU	BCL3	MYADM	MIR3945HG	LINC02812	KIF4A	NRP2	SCPEP1
64	NDRG4	SEC61G	RPSA	AHNAK	SMCHD1	UGCG	DLGAP5	CCDC28B	GAA
65	B4GALNT3	MT2A	GLIPR1	CALB2	RNF19B	AC011893.1	MCM7	MREG	GM2A
66	PLXNA2	ERO1A	RPL23A	ZNRF1	CXCR1	GAS6	CDCA5	CD83	EPHX1
67	HSD3B7	CXCL5	CD1E	ARMH1	VMP1	CDH1	CKAP2L	PTPN1	LRPAP1
68	ATP6V1G1	VCAN	RPL6	EGR1	CD55	SERPINF1	PCNA	PLAAT3	HLA-DMB
69	ACO2	SMIM25	NME2	ST8SIA6	XPO6	P2RY6	CENPK	NAA25	LAPTM5
70	AL158212.5	TPI1	RPL18	GMPR	CYP4F3	HERPUD1	CDCA8	ADORA2A	AKR1B1
71	AHNAK2	SPHK1	GDI2	CNRIP1	AL356417.3	FUZ	RAD51AP1	MYO1G	LAIR1
72	GLCCI1	BEST1	RPL27	JUN	NFKBIA	PMEPA1	KIFC1	PPA1	GAL3ST4
73	F2R	TNFSF15	RPL5	LMNA	SLC25A37	EZR	SHCBP1	RELB	ACP2
74	BDH1	PTPN12	ACTB	SVOPL	KLF2	CYFIP2	TCF19	AOC1	MGST3
75	SNX10	IL1R1	RPL30	P2RX1	MME	ZBTB18	RACGAP1	NMRK1	CYBA
76	PPIC	TLR2	TMSB4X	COL18A1	KCNJ15	SLC20A1	AC011603.2	YWHAQ	CAPG
77	LINC01169	IL1RN	RPL7A	CTSW	PGS1	PLP2	SIVA1	BASP1	SELENOP
78	ASAP3	MFSD2A	FAU	DUSP10	IFIT3	JCHAIN	CENPA	CDK2	CTSL
79	OXCT1	HK2	GPAT3	HEG1	RGL4	BCL11A	RANBP1	TBC1D8	BCAP31
80	SCD5	PIK3AP1	CFL1	PBX1	CXCL8	LTB	ARHGAP11A	CD40	MS4A6A
81	S100A4	PGK1	PRELID1	LAPTM4A	ATP2B1-AS1	AZIN2	KIF23	ACTB	IDH1
82	AC097448.1	ATP2B1	RPLP2	CADPS	AC136475.5	LTK	NDC80	RPS27L	TTYH3
83	LINC01600	PTGS2	SNX3	HS6ST1	LINC01506	SELL	MND1	CYB5A	LAMP2
84	C17orf113	SLC16A10	APRT	DUSP6	GTPBP1	CIB2	RRM1	CEP350	HLA-DMA
85	AC100835.2	SLC2A3	PSME2	RSRP1	TNFRSF10C	AL513493.1	CIT	FLT3	UNC93B1
86	SH3GL2	FCER1G	RPS21	CAVIN2	H3F3B	ZFAT-AS1	PHF19	PRRG4	LY96
87	SHC3	SLCO4A1	RPS11	HPGD	NFKBIZ	SIDT1	RPA3	SLC5A6	LGALS3
88	AL079338.1	SPP1	LCP1	ADAM12	MXD1	CYB561A3	ATAD2	ARNTL2	DPP7
89	AC127496.1	GCH1	H2AFY	NSMCE1	SORL1	CRYM	FANCI	GPX4	MERTK
90	NAT14	HIF1A	PLAC8	BTK	IRF1	CD2AP	HIST1H4C	KCNN1	FUCA1
91	PTPN22	ITGB8	PFN1	BTG2	AC011472.2	AC073111.4	SPC25	TMSB10	C3AR1
92	MCRIP2	BCL2A1	PYCARD	ALOX5	IL1R2	PPM1K	CENPE	DSG2	ATP6V1F
93	SPR	EPB41L3	RPL10	EMID1	NFIL3	MMRN1	ORC6	ARHGAP10	LGALS3BP
94	STRADB	NT5E	C1QBP	ABCC4	S100A12	NLRP7	NEK2	HLA-DOB	MPP1
95	AP002807.1	MAP2K1	SPINT2	AC020916.1	ZFP36L1	AJAP1	TROAP	C17orf49	KCNMA1
96	UNC5B-AS1	LDHA	WDFY4	FER	RNF149	TMIGD2	CLSPN	FAM118A	STAB1
97	EIF3G	SERPINB9	RPL14	ENPP3	ALDH1A2	SLC35F3	CDCA2	INSM1	PMP22
98	FADS1	TRGC1	AVPI1	DNAJA1	LINC00211	RGS7	IDH2	OSTF1	IGSF6
99	ST6GALNAC3	MCEMP1	RPL22	PLAT	AL034397.3	HSP90B1	WDR34	SPRED2	LILRB4

## Sheet: Myeloid_F1
	pM1_FU1 (shared)	pM2_FU1 (shared, proliferation)	pM3_FU1 (shared, C1Q macs)	pM4_FU1 (shared, pDC)	pM5_FU1 (unique)	contaminant	pM7_FU1 (shared, neutrophil)	pM8_FU1 (shared, CLEC9A+ XCR1+ DC)	contaminant	pM10_FU1 (shared, inflammatory)	pM11_FU1 (shared, mast)	contaminant	pM13_FU1 (shared, FCN1, CXCL10/11)	pM14_FU1 (shared, metallothioneins)	pM15_FU1 (TREM2)	contaminant	pM17_FU1 (shared, mregDC)	pM18_FU1 (shared, CLEC10A+ CD1C+ DC)
0	BNIP3	UBE2C	C1QC	LILRA4	CCDC33	SP6	IFITM2	CLEC9A	CELF2-AS2	IL1A	CPA3	AL669841.1	FCN1	TMEM176B	TREM2	TRBV16	FSCN1	CD1C
1	BNIP3L	NUSAP1	SELENOP	SMPD3	ISLR	PAGE2	FCGR3B	CPVL	LINC01484	CCL4	VWA5A	SOWAHA	CXCL10	MT1F	CD9	AC092645.2	LAMP3	COTL1
2	SDC2	TPX2	C1QB	CLIC3	SERPINB7	AL136298.1	CSF3R	CPNE3	AC104248.1	CCL3	MS4A2	LINC02303	WARS	MT2A	FBP1	TXNDC12-AS1	BIRC3	PKIB
3	GAPDH	CDC20	SLC40A1	CLEC4C	DLL4	FIBCD1	TAGAP	WDFY4	COL4A3	IL6	TPSB2	AP003032.2	GBP4	FCER1G	CYP27A1	PKHD1	ANKRD33B	GPAT3
4	HK2	HMMR	C1QA	GZMB	STRA6	PTN	IFITM1	CCND1	IGHG1	IL1B	KIT	AL589182.1	ACOD1	MT1M	GCHFR	IL2RB	TBC1D4	CD1E
5	ERO1A	PLK1	A2M	SCT	PRAME	LINC02725	PDE4B	TACSTD2	IGKV2D-28	TNFAIP6	SLC18A2	AC148477.2	CXCL11	MT1X	DBI	FOXP3	LAD1	JAML
6	SLAMF9	ASPM	FUCA1	PTPRS	MIR155HG	AC016027.3	HCAR3	C1orf54	IGHG3	NBN	TPSAB1	SAA2	APOBEC3A	ATOX1	VAT1	HLF	SINHCAF	CLEC10A
7	SLC2A3	TROAP	FOLR2	TCF4	AC099342.1	CTSK	SELL	CADM1	IGHG4	CCL4L2	HPGDS	MYCNOS	GBP1	MT1G	APOC1	CD3D	CCR7	PLD4
8	NDRG1	CCNB1	EPHX1	TSPAN13	CABP1	AK5	TNFRSF10C	NAAA	IGHV2-5	CCL3L1	HDC	PLPPR1	LAP3	TMEM176A	GM2A	LINC01550	ANXA6	HIC1
9	BCAT1	CENPF	PLD3	MAP1A	PLAAT3	COL6A2	IFIT3	XCR1	IGHGP	PTGS2	CLU	AL390071.1	GBP5	MT1H	TSPO	HIST1H3G	KDM2B	RPS3A
10	MIF	CCNA2	SLCO2B1	LRRC26	MAATS1	HTRA3	GCA	DBN1	AC012236.1	DRAM1	GATA2	GRK1	PRNP	MT1E	LTA4H	HIST1H2AL	RAB9A	RPS19
11	PID1	CCNB2	C2	LDLRAD4	KCNQ4	MMP9	FFAR2	CST3	IGKC	SOD2	IL1RL1	SP5	YBX3	CTSH	MGST3	CTLA4	LY75	CORO1A
12	LDHA	CDKN3	FCGRT	CXCR3	CKB	SDC1	CXCR2	ENPP1	IGKV2-28	C15orf48	BACE2	AC116345.1	CYTOR	LILRB4	CHI3L1	TRBC2	TXN	RPS6
13	SLCO4A1	AURKB	AKR1B1	TLR9	PERP	HSPB7	IFIT2	NAPSA	MZB1	TNF	TPSD1	PLA2G2A	DEFB1	PGD	CAPG	CD3E	GRSF1	EEF1B2
14	RAB13	BIRC5	CFD	PPP1R14B	AL592211.1	COL6A1	HCAR2	PPY	JCHAIN	CXCL8	RHEX	CDX1	TOP1	TYMP	TM4SF19	TRAV29DV5	GPR157	ARL4C
15	PLIN2	KIF2C	ADAMDEC1	PACSIN1	EAF2	WWC1	CMTM2	ASB2	FAM30A	MIR3945HG	MAOB	PPP1R1B	VAMP5	FPR3	OTOA	IL26	DAPP1	RPSA
16	TPI1	CDK1	CD163L1	NIBAN3	EMX1	TCIRG1	MNDA	SNX3	CD27	INHBA	SLC24A3	LGR5	S100A4	LHFPL2	CD52	CD7	EBI3	RPS5
17	TNFRSF1B	CEP55	LGMN	SLC15A4	AL592431.1	SLC9B2	VNN2	DNASE1L3	FKBP11	RAPGEF2	LTC4S	DPEP1	MIR4435-2HG	S100A6	KIAA0930	LCK	CST7	NDRG2
18	FTH1	CDCA3	DNASE2	SEL1L3	BX255923.2	AL118558.4	SOCS3	CCSER1	FCRL5	PSTPIP2	MLPH	KRT18	HSPA1B	MMP14	MCRIP2	AC068279.2	CERS6	RPS18
19	GPI	TOP2A	TSPAN4	SPIB	NRG2	AC025062.3	CASS4	GNAO1	DERL3	SLAMF7	SIGLEC6	H19	LYZ	VAMP5	CALM3	CD2	SYNGR2	RPL6
20	METTL9	NEK2	MS4A6A	TRAF4	LINC02528	TACC2	MMP25	CLNK	AC246787.2	BCL2A1	ATP6V0A2	KRT8	HSPA1A	CTSL	NDUFB9	GPR19	RAB30	RPS23
21	ALDOA	BUB1B	TMEM37	EGLN3	CD200	AC112721.2	FPR1	NYAP2	POU2AF1	IL23A	RGS13	MYCN	DNAJB1	CALM1	VSIG4	ASH1L-IT1	CLIC2	CD1A
22	CA12	NUF2	PLTP	APP	CITED4	VWA2	SMCHD1	RAB7B	AF165147.1	IL27	RAB27B	PHGR1	KCTD12	PLA2G7	GPNMB	AL109923.1	MARCKSL1	YWHAH
23	VCAN	NDC80	TCN2	TPM2	SLC16A14	AL449983.1	IRF1	HLA-DOB	LINC02015	TRGC1	PTGS1	LCN2	PARP14	PRDX1	FTL	AL645608.2	ACHE	RPL18A
24	BTG1	CDCA8	MS4A4A	C12orf75	AC068025.2	STEAP2	CXCR1	HLA-DPB1	MT1HL1	TNFAIP2	SLC45A3	GLB1L2	SSB	CTSB	LIPA	LINC02195	NUB1	HLA-DPB1
25	SLC2A1	CKS1B	IGF1	SHD	LINC02718	FMO1	FPR2	CYP2E1	FBXO16	TRAF1	AL157895.1	VSNL1	IRF7	S100A10	CHCHD10	CD28	LSP1	RPS14
26	SNAPC1	KIF20A	ASAH1	IRF4	LINC00158	PPIC	YPEL3	SHTN1	CNKSR1	GNG2	GRAP2	RNF128	HSPA6	CYBB	MSR1	RORA	STK4	RPLP0
27	SLC16A10	MKI67	APOE	EZR	NXN	JDP2	RSAD2	CNGA4	IFNG-AS1	MARCKS	ADRB2	YBX2	NLRP3	PILRA	MDH1	IL12RB2	RFTN1	RPL26
28	GNA15	PIMREG	ABCC5	KRT5	SOCS2	PLXNA2	S100A8	HLA-DQB1	AL391056.1	MFSD2A	LAT	SLC5A1	SNAI1	MMP12	CTSD	TNFRSF4	ALDH2	FAM110A
29	AK4	ANLN	PSAP	DRD4	CCDC50	THOP1	IFIT1	LGALS2	SAMD3	CXCL3	LAX1	HNF4A	GCH1	S100A11	DNASE2B	HIST1H4C	KIF2A	RPL10A
30	ENO2	KIF11	GRN	SCAMP5	EXTL1	ACP5	IFITM3	PLEKHG4B	TIGIT	TNIP3	ANXA1	LARGE2	AC020656.1	SLC31A2	NOP10	AC010996.1	CALCRL	RPL23A
31	EREG	DEPDC1	CTSC	SPON2	LINC02381	YIPF7	MX2	CAMK2D	AL031280.1	FNDC3B	NTRK1	CLDN4	IFI35	SERPING1	BRI3	TICRR	CRIP1	RPS15A
32	HSPB1	GTSE1	QPRT	CDH1	ADIRF	AL353150.1	S100P	HLA-DRB5	AC091153.3	RNF144B	RHOBTB3	EPS8L3	OAS2	FTH1	ANXA2	HELLS	RHOF	RPS3
33	P4HA1	CENPA	CTSS	IL3RA	RHOV	ANGPTL2	FCGR3A	HDAC9	AL122035.1	SLC39A8	CADPS	RAD51AP2	TAP1	RGL1	RBP4	RAD54L	TSPAN33	PAK1
34	C4orf3	HMGN2	ATP6V0D2	LIME1	HMGN3	ADAMTS4	MSRB1	AC010931.2	AP001469.1	P2RX7	TESPA1	BTNL9	IFI44L	JOSD2	BCAP31	ANKS1B	CRLF2	RPL32
35	NT5E	KNL1	DAB2	OPN3	NXPH3	REM1	SORL1	AL139398.1	PHGDH	PLAUR	KLRG1	CT83	APOL6	RRAS	FABP5	LAIR2	SYNPO	RPL35
36	AC009630.4	KIF14	ABHD12	ZFAT	LINC01539	AKAP6	P2RY13	AL365356.1	TSHR	NFKB1	GCSAML	AL135910.1	CALHM6	MSC	RMDN3	AC012186.2	POGLUT1	NRARP
37	ABHD17C	HMGB2	SDC3	PLD4	CCR7	RIMS3	RNF149	PCDHA9	KCNK9	CCL20	SYTL2	HOXA13	HSP90AA1	CALHM6	SPP1	HIST1H3B	PLEKHG1	SAMHD1
38	AC026310.2	CKAP2	CTSZ	PTCRA	CYP7B1	FTCD	OSM	TRBV12-5	AC113139.1	STK26	ARHGEF6	AL590235.2	CCL2	NR1H3	CSTB	HIST1H2AH	CD70	RPS24
39	VEGFA	DLGAP5	ITM2B	ITM2C	PTGES3L	AC027250.2	ALPL	THRB	AL359504.2	DNAAF1	NDFIP2	MISP	EPSTI1	NRP1	ATP5MC3	FAM111B	SIAH2	RPS4X
40	ANPEP	PRC1	STAB1	SLC32A1	LIMCH1	AC006566.1	TMEM154	AC092723.3	AC245060.5	SLC2A6	HPGD	CA8	BAG3	EMP3	FDX1	LINC00861	PRRG4	HLA-DPA1
41	ZNF395	CENPM	HEXA	FUZ	YWHAQ	AP003068.1	RHOH	HLA-DPA1	RLN2	NFKBIA	AC020914.1	REEP1	RNF19B	PAPSS1	HAMP	TP73	SPRED2	RPL29
42	BASP1	SGO2	SCARB1	SLA2	AC073072.1	VWA1	SHISA5	SLC24A4	KCNJ11	WTAP	CNRIP1	TFF3	CXCL9	ARID5B	NPC2	RRM2	FNBP1	RPS7
43	TIMP1	BUB1	CTSA	P2RY6	FSD1L	NHLRC3	S100A9	PLCD1	AC090517.2	ATP2B1	FOSB	KLHL32	S100A9	SQOR	APOE	HIST1H2AI	TRIP10	RUNX3
44	CD44	HJURP	CREG1	PHEX	AL121972.1	PHETA1	CLEC2B	CDK2AP1	CD3G	SNX10	DLC1	CBLC	PLAAT4	STAT1	SPARC	LINC02273	SLCO5A1	GDI2
45	SLC11A1	NCAPG	LILRB5	POLB	TMCC2	B3GNT6	PROK2	VAC14	LINC00471	TNFAIP8	SKAP1	AL096712.2	PNP	PDPN	GALM	ZC3H12D	RASSF4	EEF1G
46	MSANTD3	MAD2L1	AP1B1	ST6GALNAC4	PDCD1LG2	AC068473.3	ADGRG3	CLCN4	NEK5	CXCL2	STXBP6	ZIC2	TNFAIP2	SDF2L1	FAM20C	GINS2	EEF1A1	RPS13
47	TNS1	CDCA2	HLA-DMB	PLXNA4	OXTR	S100A3	KCNJ15	GPR31	SEC11C	STAT4	LEO1	NOX1	LACTB	SELENOS	PPARG	MYBL2	CD86	RPL4
48	CEMIP	PCLAF	ME1	TTC24	STMN1	RFTN2	CSF2RB	IRF8	IGLC1	CXCL1	SMYD3	SEPTIN9-DT	TGFB1	SELENOM	NUPR1	CDT1	PPA1	RPL7A
49	ATP13A3	GPSM2	ITGB5	IGLON5	ZNF280B	SLC25A4	LIMK2	CD74	CD3E	MCOLN2	ITM2A	CKMT1B	PSMB9	ACP2	ACOT2	BCL11B	CDKN1A	RPL5
50	ERGIC1	PTTG1	CCDC152	RAB11FIP1	RIMS2	CLIC6	MME	SERPINF2	C12orf60	GCH1	ST8SIA6	LCN15	UBE2D3	OLFML2B	TIMP2	HIST1H1E	CCL19	HLA-DQB1
51	NAMPT	STMN1	SLC7A8	FAM160A1	AC119427.1	SLC37A2	ANP32A	PPT1	LIME1	NINJ1	CALB2	CALML3	HSPE1	IL7R	CD63	PCNA	TVP23A	RPL3
52	ENO1	NCAPH	SCPEP1	AL513493.1	RAB23	CFI	ZDHHC18	FBXO17	ERLEC1	CCRL2	MAST4	AC018557.2	ISG20	CD14	ATP6V1F	HIST1H2AM	TRAFD1	HLA-DRB1
53	HIF1A-AS3	KIF4A	CD68	LTB	SCML2	LINC02236	ZBP1	NALCN	TNFRSF17	EIF1B	PLAT	AC127526.4	EMP1	SNX10	APLP2	UBE2T	CSF2RA	TCTN3
54	PGK1	TLCD3B	CTSD	AC104024.1	SERPINE2	GPC1	TNFRSF1A	AC007991.4	Z99774.1	CLEC4E	CAVIN2	TSPAN12	SECTM1	DHRS4L2	DHCR24	MCM2	NDE1	RPL13
55	IL1RN	LINC01786	KCNMA1	CUX2	LINC02384	AC016355.1	AC026333.3	HLA-DQA1	SMIM15-AS1	PNRC1	HS6ST1	ITGA6	TYMP	CD163	BLVRB	ESCO2	SLC22A23	AL138899.1
56	FLT1	AC243585.2	CRYL1	PTPRCAP	PDCD5	TOM1L1	LRG1	BTLA	SDC1	RIPK2	PBX1	POF1B	RPS16	SLAMF8	CD81	ZNF367	DUSP5	RPS15
57	UPP1	KPNA2	SLC46A1	IRF7	CCL19	LAG3	ABTB1	AC108749.1	AL132800.1	TNFAIP3	EMID1	AC103702.2	CDKN1A	GLIPR2	KCNJ5	PTPRCAP	AOC1	AXL
58	CSTB	SGO1	ACP5	CD2AP	ZCCHC18	COL27A1	AL356417.3	TMEM14A	IGSF22	SDC4	TNIK	PACSIN3	DNAJA4	MYL6	RAB42	VSTM4	NAA25	GLIPR1
59	IL1R1	KNSTRN	GPR34	SOX4	EBI3	BCAR1	RIPOR2	HLA-DRB1	TXNDC5	ADORA2A	AHR	PBK	ARID5A	ANXA2	GUSB	HIST1H3C	FLT3	HLA-DRA
60	BZW1	KIF15	GPNMB	INPP4A	AL136982.3	SSC5D	CD55	FBXO27	LINC02539	IRAK2	P2RX1	HNF1B	NAF1	SELENOW	USF2	CD3G	CCL22	RPS12
61	GPAT4	ARHGAP11A	RNF130	AC007381.1	MAOA	MYO1B	R3HDM4	KIF16B	AL358790.1	HIVEP2	ABCC4	PKP3	CD300E	GGT5	COLEC12	ABLIM2	RPS27L	CD74
62	ANXA5	KIFC1	HEXB	MMP23B	TREML1	LNX1	RNF24	HTR3A	NUP210	CLIC4	ENPP3	CCL25	S100A12	GPX4	GAPLINC	MCM10	KCNN1	RPL8
63	DLL1	OIP5	MERTK	GAS6	CFLAR	RUFY4	AC007032.1	PAK3	MLANA	ANXA5	TENT5A	AADAT	RPS9	AP2S1	ATP6V0D1	EFCAB8	MREG	RPS8
64	ALDOC	TUBB	ADA2	DERL3	CD86	ITGA3	AC005050.3	AC035139.2	LINC02576	AC022816.1	LMO4	AC099050.1	KDM6B	SCARB2	HAGHL	E2F1	RAMP1	NME2
65	EPB41L3	TYMS	LAMP2	CPLX1	L3MBTL4	MYO1D	CDA	AC063944.1	DDX11	IER3	LMNA	AL359198.1	SLC7A5	CCL18	SLC38A6	CDCA5	TNFRSF11A	RPL19
66	PIK3CB	TUBA1B	GAL3ST4	FCHSD2	CCL22	TEAD4	USP10	ASIC2	CTLA4	GK	SVOPL	LINC00470	LINC02605	CTSC	LPL	HIST1H3F	MAP3K14	RPL15
67	MET	CENPE	SERPINF1	RGS7	SEPTIN11	AL136309.2	HIST1H2AC	SOX7	AP001505.1	NDUFV2	INTS6	MID1	STAT2	GLRX	CIAO2A	SGSM1	FYTTD1	CD207
68	MXI1	GGH	CTSF	HERPUD1	NUB1	COL6A3	LINC01506	SNX22	TENT5C	CFLAR	LIF	CCNI2	STX11	SLC7A11	SH3BGRL3	AL451062.1	GLS	RPL18
69	NINJ1	SPC25	GAA	PLVAP	CRIP1	C5	IFI16	MPEG1	EYA2	GBP3	CTSW	AL118511.1	TIMP1	PSME2	VEGFB	IL21R	YWHAQ	RPS2
70	BAG3	CIT	LGALS3BP	LTK	KCNN1	SPARC	EVI2B	FKBP1B	NLRP7	PLEK	AC020916.1	AC018557.1	GOLM1	TALDO1	RRAGD	CLSPN	PDCL3	GSN
71	NGLY1	TTK	TIMP2	RUBCN	CD40	DNM1	MBOAT7	HLA-DRA	TRBC1	PIM3	LAPTM4A	AC131571.1	SAMD4A	CLEC4E	HSD17B14	DUT	CD83	RPL11
72	SAP30	PARPBP	MGST2	SEMA7A	PTP4A1	COL18A1	LITAF	THRB-IT1	AC093635.1	XBP1	IDS	KRTAP5-AS1	CHORDC1	PTPRE	PLPP3	MCM3	MALT1	C1QBP
73	FAM124A	ZWINT	HLA-DMA	SEC61B	LINC01018	MGAT5	HLA-E	VCAM1	IGHM	TNIP1	FER	MATN2	APOL3	TNFSF13	NPL	RAD54B	NCCRP1	CCR6
74	RIOK3	TK1	CD209	NR3C1	PTPRG-AS1	ANPEP	SLC25A37	LINC02206	HID1	RAP2C	ACSL4	MST1R	PRELID1	RAB5IF	LGALS3	BVES	CEP350	SPINT2
75	HILPDA	NUCKS1	ADAP2	BCL11A	ENPP4	PLXNB3	CYP4F3	MAP4K1	HLF	CD83	NSMCE1	CLRN3	IL31RA	KRTCAP2	CD68	RANBP1	ACTB	SLC38A1
76	PTTG1IP	HMGB1	ALDH1A1	AZIN2	SYNPO	CA5A	AC136475.5	PPM1J	LMTK3	NFE2L2	GMPR	HNF1A	IFIH1	SH3BGRL3	PLA2G15	TYMS	PPP1R14A	HLA-DQA1
77	AMPD3	RACGAP1	RNASET2	SPN	HMSD	FAM3B	PLEK	DENND1B	MEF2B	FLT1	TIMP3	HNF4G	UBE2L6	ATP6V0B	YBX1	PYHIN1	CYB5A	RPL41
78	KDM7A	KIF23	OLFML3	SLC12A3	ZFPM2	S100A4	XPO6	DPF1	LINC02021	KYNU	EPB41L1	AC009065.2	DNAJA1	C4orf48	CHCHD6	TOX2	CDK2	BTF3
79	MPZL1	ARHGEF39	RARRES1	SIDT1	RAB8B	B3GNT3	AC005392.2	NET1	PRRG2	HS3ST3B1	BMP2K	GRHL2	ATG3	RABAC1	HM13	COL5A3	ZC3H7B	RPL27
80	TNIP1	CKAP2L	MFSD1	VASH2	SEMA7A	AL358472.3	CREB5	RFPL4A	HDHD3	F3	MYADM	CARD10	TMEM54	TMEM50A	CD99	XXYLT1-AS2	GPR183	ABI3
81	C1orf122	NCAPD2	RNASE6	UGCG	ADORA2A	ITGB3	TMEM140	TCERG1L	AL022238.2	ARL8B	CTTNBP2	EPN3	RNF213	LINC02345	GLMP	CD27	OSTF1	RPL14
82	SH3BP5	TMPO	LIPA	SEPTIN1	CD70	NDUFS8	AC015912.3	SEPTIN3	AC096921.2	DNAJC3	FOXP1	DNAH6	RPL38	CYBA	CTSA	LINC01018	INSM1	EIF3L
83	DNAJB1	SHCBP1	DPP7	PLP2	RNF115	AC012485.3	HIST1H2BC	CYP3A4	ZNF280B	ACSL1	CD82	AC002454.1	BAZ1A	ATP5F1E	PSAP	IL32	EBF4	RPL22
84	BCKDK	DTYMK	CD81	PROC	SOCS2-AS1	PDLIM4	HSH2D	FP236315.1	PRDX4	CD44	MEIS2	AJUBA	ZC3H12A	MMP10	C9orf16	PCP2	RAB29	CKLF
85	CDCP1	FOXM1	TMEM176B	CARD11	FZD9	ME3	TRIM25	IGHV4-80	PSMG3	G0S2	COL18A1	ACOXL-AS1	LCP2	IFI30	GALNT12	MCM6	TBC1D8	CIB1
86	TM4SF1	KLRC4	FABP3	CIB2	CCDC73	CBLB	LINC00921	KCNC1	SOX12	AL031590.1	BTK	AC008115.4	DENND5A	SNX8	MATK	TMEM106C	S1PR1	ARHGDIB
87	ITGB8	MELK	LINC01857	CHAF1A	CXCR5	AC009118.3	ICAM3	G3BP2	MIAT	REL	JUN	SULF1	CGAS	NKG7	TMEM251	PCLAF	ENPP4	GPRIN3
88	CLEC5A	CENPK	GSTM4	EPHA2	ANO9	C1orf198	TLR1	FAM135A	ATP2A1-AS1	ATP2B1-AS1	CAVIN1	COCH	MCUB	PSMB6	SNTB1	AL135838.1	HMSD	TOMM6
89	INSIG2	HMGB3	WWP1	NEK8	SLCO5A1	AL355336.1	LCP2	TMSB4X	BDNF-AS	MIR155HG	AGAP1	AL356441.1	ISG15	CALR	UROD	GMNN	MYO1G	HLA-DRB5
90	IRAK3	H2AFV	LYZ	WNT10A	B4GALT6	AC010883.1	KCNJ2	AC110760.2	RABAC1	GBP1	IL18R1	ERN2	HSPH1	SEM1	LRPAP1	FAAH2	PTGIR	NACA
91	VKORC1	ARL6IP1	MAF	TSEN54	HDGFL3	LNCOC1	AC099343.3	KCND3	AC005856.1	SLAMF1	PAQR5	SERPINB10	AIF1	C17orf49	ASAH1	PRDX2	RUBCN	AVPI1
92	CXCL5	CDC25B	ZNF331	AEBP1	SLC9A9	AC093227.1	CEACAM3	ZNF366	PLPP5	ELOVL7	CD22	NUP62CL	DSE	SH3PXD2B	TOMM40	TNFRSF25	RELB	NHP2
93	HSPH1	HIST1H1B	SLC2A8	NPTX2	NECTIN2	DGKI	BCL6	ENSA	CHPF	SERPINB9	NR4A1	TNK1	RASGEF1B	ATP6V1F	LGALS1	AC108066.2	MRTFA	RPL17
94	AC006064.4	KIF22	NPC2	C12orf45	CASTOR1	PIEZO1	FCGR2A	CDH2	GZMH	AK4	PALM2-AKAP2	ELF3	MRPL18	GSTO1	SLC29A3	TRIP13	P2RY10	RPL36A
95	MAMLD1	SKA1	UNC93B1	CYFIP2	MGLL	AL133367.1	LRRK2	TAP2	EFCAB12	GBP5	MAPK1	SNHG18	ARAP2	PSMB2	GRN	MKI67	ZBTB10	RPS27A
96	SLC7A11	PHF19	SDS	AC097375.1	EPDR1	IFI27	G0S2	FLT3	AC022509.3	ARFGAP3	C12orf57	TRIM31	RBMS1	UBL5	DHRS3	MCM7	RAB5B	RPS11
97	FAM162A	TMEM106C	DNAJC5B	MZB1	DAAM1	SUFU	NCF1	GCSAM	GCSH	ANKRD12	CDK15	ENOX1	ATP13A3	TYROBP	MFSD12	PKMYT1	NMRK1	APRT
98	MT2A	CDKN2C	CSF1R	USP9Y	CYTIP	CSF1R	SP110	LIVAR	HIST1H4C	PDE4DIP	KCNH2	LINC01169	PSMA4	IFI27L2	SNX24	HIST1H4F	GPR137B	CTNND1
99	PIK3AP1	LINC01515	MAN2B1	PPP1R16B	SNHG15	SGSM3	FAM8A1	NKAIN4	CEACAM6	IDO1	WASHC1	AC138627.1	UPP1	CLIC1	CTSB	TRIB2	IL15	FCER1A

[truncated: 14 more sheets: Myeloid_F2, Myeloid_normal, NK_B, NK_F1, NK_F2, NK_normal, Stromal_B, Stromal_F1, Stromal_F2, Stromal_normal, T_B, T_F1, T_F2, T_normal]
