# Supplementary material for: Sequential pembrolizumab cooperates with platinum/5FU to remodel the tumor microenvironment in advanced gastric cancer: a phase II chemoimmunotherapy trial
Source: medRxiv preprint, doi:10.1101/2023.04.03.23288062, version 1 (2023-04-03)
Supplement: Supplemental Table 6 [file 288062_file07.xlsx]

## Sheet: Global F-test
Assay	OlinkID	UniProt	Panel	term	sumsq	meansq	NumDF	DenDF	statistic	p.value	Adjusted_pval	Threshold
PDCD1	OID21396	Q15116	Oncology	Timepoint	463.639	154.546	3	93.2561	1227.21	8.76994e-75	7.73246e-71	Significant
FCN2	OID20382	Q15485	Cardiometabolic	Timepoint	48.565	16.1883	3	95.9793	47.5318	6.46007e-19	2.84792e-15	Significant
NFASC	OID20634	O94856	Inflammation	Timepoint	18.5187	6.17289	3	93.5812	41.0324	5.13475e-17	1.5091e-13	Significant
MFAP4	OID30598	P55083	Inflammation_II	Timepoint	24.9863	8.32877	3	99.4002	39.1859	8.44617e-17	1.86175e-13	Significant
NELL2	OID20706	Q99435	Inflammation	Timepoint	31.1067	10.3689	3	96.4545	37.8055	3.05173e-16	5.38142e-13	Significant
FLT3LG	OID20661	P49771	Inflammation	Timepoint	23.7711	7.9237	3	93.2692	34.0975	5.73446e-15	8.42678e-12	Significant
CNTN2	OID21426	Q02246	Oncology	Timepoint	23.0933	7.69776	3	92.9212	33.8684	6.99925e-15	8.81606e-12	Significant
C1RL	OID30721	Q9NZP8	Inflammation_II	Timepoint	6.16743	2.05581	3	98.9907	30.5285	4.65912e-14	5.13493e-11	Significant
MAN2B2	OID30306	Q9Y2E5	Cardiometabolic_II	Timepoint	12.4578	4.15261	3	91.2429	31.0241	6.46604e-14	6.33456e-11	Significant
CSPG4	OID30397	Q6UVK1	Cardiometabolic_II	Timepoint	19.6759	6.55863	3	94.6632	30.4116	7.42845e-14	6.54966e-11	Significant
L1CAM	OID21484	P32004	Oncology	Timepoint	14.0714	4.69048	3	91.815	30.1933	1.13385e-13	9.08832e-11	Significant
AOC3	OID20389	Q16853	Cardiometabolic	Timepoint	10.6019	3.53398	3	93.6466	29.3008	1.89064e-13	1.38915e-10	Significant
CNTNAP2	OID20556	Q9UHC6	Inflammation	Timepoint	14.0689	4.68962	3	91.6489	29.1309	2.5621e-13	1.73769e-10	Significant
NOTCH3	OID20253	Q9UM47	Cardiometabolic	Timepoint	20.996	6.99866	3	94.5504	27.9047	5.18078e-13	3.26278e-10	Significant
TMPRSS5	OID20947	Q9H3S3	Neurology	Timepoint	7.79138	2.59713	3	90.4249	27.4077	1.06825e-12	5.7397e-10	Significant
ADA2	OID20394	Q9NZK5	Cardiometabolic	Timepoint	18.0984	6.03281	3	93.3207	27.0947	1.08203e-12	5.7397e-10	Significant
CEACAM16	OID31495	Q2WEN9	Oncology_II	Timepoint	29.1684	9.7228	3	91.8042	27.1486	1.16909e-12	5.7397e-10	Significant
ITGB7	OID21393	P26010	Oncology	Timepoint	14.6023	4.86742	3	92.891	27.0365	1.17177e-12	5.7397e-10	Significant
CLEC4G	OID20590	Q6UXB4	Inflammation	Timepoint	15.9688	5.32292	3	95.073	26.5058	1.51693e-12	7.03935e-10	Significant
ADGRE2	OID20755	Q9UHX3	Inflammation	Timepoint	18.9342	6.31139	3	94.7366	25.3582	3.95583e-12	1.74393e-09	Significant
DPP6	OID21354	P42658	Oncology	Timepoint	15.6188	5.20626	3	94.1176	24.9049	5.99726e-12	2.51799e-09	Significant
NRCAM	OID20229	Q92823	Cardiometabolic	Timepoint	19.7628	6.58761	3	94.9951	24.7375	6.49111e-12	2.60146e-09	Significant
KEL	OID20881	P23276	Neurology	Timepoint	16.4411	5.48035	3	94.2956	24.3017	9.77786e-12	3.74832e-09	Significant
LYVE1	OID30728	Q9Y5Y7	Inflammation_II	Timepoint	5.51134	1.83711	3	94.8115	24.106	1.11358e-11	4.09102e-09	Significant
ADGRE1	OID31483	Q14246	Oncology_II	Timepoint	27.3758	9.12527	3	94.0829	23.2247	2.45575e-11	8.66094e-09	Significant
PROC	OID20402	P04070	Cardiometabolic	Timepoint	22.3723	7.45744	3	95.1667	22.7504	3.45007e-11	1.16997e-08	Significant
GDNF	OID20861	P39905	Neurology	Timepoint	23.0488	7.68293	3	94.1587	22.578	4.24932e-11	1.38764e-08	Significant
SERPINA9	OID21284	Q86WD7	Oncology	Timepoint	51.7256	17.2419	3	94.161	22.4123	4.90083e-11	1.54324e-08	Significant
TG	OID31359	P01266	Oncology_II	Timepoint	40.0117	13.3372	3	92.9841	22.2613	5.98475e-11	1.76936e-08	Significant
SEMA7A	OID20283	O75326	Cardiometabolic	Timepoint	9.78081	3.26027	3	94.8705	22.1272	6.02029e-11	1.76936e-08	Significant
PTPRZ1	OID30343	P23471	Cardiometabolic_II	Timepoint	21.1676	7.05586	3	92.4398	22.1196	6.98319e-11	1.98616e-08	Significant
ADGRE5	OID20260	P48960	Cardiometabolic	Timepoint	17.9792	5.99308	3	95.0812	21.8587	7.51854e-11	2.07159e-08	Significant
MCAM	OID20343	P43121	Cardiometabolic	Timepoint	15.0933	5.03109	3	95.3376	21.4575	1.05449e-10	2.81739e-08	Significant
ACHE	OID30585	P22303	Inflammation_II	Timepoint	14.3166	4.77219	3	97.9346	20.995	1.38907e-10	3.55903e-08	Significant
CD33	OID21472	P20138	Oncology	Timepoint	13.8248	4.60827	3	90.6834	21.4227	1.41279e-10	3.55903e-08	Significant
FBLN2	OID30378	P98095	Cardiometabolic_II	Timepoint	14.141	4.71367	3	92.9937	21.0883	1.65936e-10	4.06405e-08	Significant
WARS	OID21084	P23381	Neurology	Timepoint	26.1642	8.72139	3	93.7153	20.8242	2.01466e-10	4.80088e-08	Significant
IGSF3	OID21312	O75054	Oncology	Timepoint	13.1182	4.37273	3	92.3572	20.6723	2.47881e-10	5.75149e-08	Significant
PRND	OID31124	Q9UKY0	Neurology_II	Timepoint	22.8319	7.61065	3	92.7824	20.4653	2.91108e-10	6.58129e-08	Significant
ZP3	OID30265	P21754	Cardiometabolic_II	Timepoint	21.3419	7.11396	3	90.4788	20.2176	4.09867e-10	9.0345e-08	Significant
GFRAL	OID31091	Q6UXV0	Neurology_II	Timepoint	7.79666	2.59889	3	92.2894	19.7738	5.53955e-10	1.19127e-07	Significant
COMP	OID20405	P49747	Cardiometabolic	Timepoint	17.6415	5.88049	3	95.2242	19.5033	6.13243e-10	1.28737e-07	Significant
OMG	OID21352	P23515	Oncology	Timepoint	31.3772	10.4591	3	91.4906	19.5714	6.91769e-10	1.40824e-07	Significant
THBS4	OID20368	P35443	Cardiometabolic	Timepoint	17.9152	5.97173	3	95.6895	19.3308	7.02761e-10	1.40824e-07	Significant
PRTG	OID21443	Q2VWP7	Oncology	Timepoint	7.17374	2.39125	3	90.6557	19.3062	9.15719e-10	1.7942e-07	Significant
BCAM	OID21076	P50895	Neurology	Timepoint	10.3558	3.45193	3	93.4153	18.9964	1.06173e-09	2.03507e-07	Significant
LILRA6	OID30346	Q6PI73	Cardiometabolic_II	Timepoint	9.33254	3.11085	3	90.6822	18.9503	1.26142e-09	2.36637e-07	Significant
COL4A1	OID20208	P02462	Cardiometabolic	Timepoint	30.0506	10.0169	3	96.4942	18.4179	1.58215e-09	2.90622e-07	Significant
ADAMTS8	OID21502	Q9UP79	Oncology	Timepoint	11.6688	3.8896	3	93.2772	18.4763	1.72448e-09	3.103e-07	Significant
CR1	OID30697	P17927	Inflammation_II	Timepoint	8.11272	2.70424	3	94.5353	18.3108	1.9024e-09	3.3547e-07	Significant
TNFSF8	OID30384	P32971	Cardiometabolic_II	Timepoint	8.605	2.86833	3	95.4483	18.2432	1.94842e-09	3.36847e-07	Significant
FCGR2A	OID20391	P12318	Cardiometabolic	Timepoint	8.97632	2.99211	3	93.1465	18.2798	2.08092e-09	3.52837e-07	Significant
MST1	OID30713	P26927	Inflammation_II	Timepoint	11.0284	3.67612	3	96.0249	18.0654	2.24737e-09	3.73869e-07	Significant
GUSB	OID20296	P08236	Cardiometabolic	Timepoint	9.96109	3.32036	3	96.9961	17.9872	2.32493e-09	3.79609e-07	Significant
CD28	OID21265	P10747	Oncology	Timepoint	15.2679	5.08931	3	95.7341	17.7863	2.96033e-09	4.68805e-07	Significant
CA9	OID21417	Q16790	Oncology	Timepoint	33.3255	11.1085	3	95.2263	17.7798	3.04101e-09	4.68805e-07	Significant
EDA2R	OID21451	Q9HAV5	Oncology	Timepoint	8.41704	2.80568	3	91.9388	17.9262	3.04779e-09	4.68805e-07	Significant
OLFM4	OID30665	Q6UX06	Inflammation_II	Timepoint	34.2203	11.4068	3	92.1336	17.9044	3.0839e-09	4.68805e-07	Significant
VCAM1	OID20396	P19320	Cardiometabolic	Timepoint	10.0524	3.3508	3	93.9512	17.7328	3.3511e-09	4.90062e-07	Significant
BPIFB1	OID20308	Q8TDL5	Cardiometabolic	Timepoint	16.3681	5.45605	3	92.3159	17.8002	3.37172e-09	4.90062e-07	Significant
CRTAM	OID20914	O95727	Neurology	Timepoint	13.5217	4.50725	3	94.295	17.7052	3.39047e-09	4.90062e-07	Significant
PKD1	OID30328	P98161	Cardiometabolic_II	Timepoint	8.39808	2.79936	3	93.3424	17.53	4.15999e-09	5.88948e-07	Significant
CD6	OID20649	P30203	Inflammation	Timepoint	10.0914	3.36381	3	93.9937	17.4894	4.2082e-09	5.88948e-07	Significant
COL5A1	OID30587	P20908	Inflammation_II	Timepoint	26.8452	8.9484	3	92.4851	17.4306	4.7336e-09	6.52127e-07	Significant
IFNGR2	OID20941	P38484	Neurology	Timepoint	6.04641	2.01547	3	91.3863	17.4227	4.99372e-09	6.77379e-07	Significant
IGSF9	OID30330	Q9P2J2	Cardiometabolic_II	Timepoint	20.8026	6.93421	3	92.9936	17.0488	6.65181e-09	8.88621e-07	Significant
CNTN1	OID20307	Q12860	Cardiometabolic	Timepoint	8.90399	2.968	3	96.1746	16.7299	7.99425e-09	1.05202e-06	Significant
PTPRC	OID30380	P08575	Cardiometabolic_II	Timepoint	6.06513	2.02171	3	94.7142	16.5663	9.88139e-09	1.28124e-06	Significant
GIMAP7	OID30639	Q8NHV1	Inflammation_II	Timepoint	6.11824	2.03941	3	96.1167	16.1647	1.38787e-08	1.77346e-06	Significant
IFI30	OID31505	P13284	Oncology_II	Timepoint	11.182	3.72733	3	93.0944	16.1813	1.5216e-08	1.91657e-06	Significant
PDGFRA	OID20133	P16234	Cardiometabolic	Timepoint	11.1764	3.72548	3	92.8935	15.6677	2.52418e-08	3.1346e-06	Significant
CD86	OID31500	P42081	Oncology_II	Timepoint	9.64171	3.2139	3	95.3415	15.4709	2.81795e-08	3.45081e-06	Significant
LILRA2	OID21152	Q8N149	Neurology	Timepoint	9.91966	3.30655	3	90.8792	15.5546	3.02626e-08	3.65514e-06	Significant
HEPACAM2	OID31151	A8MVW5	Neurology_II	Timepoint	11.6424	3.88079	3	93.4947	15.423	3.14202e-08	3.74367e-06	Significant
CD109	OID21108	Q6YHK3	Neurology	Timepoint	7.78485	2.59495	3	94.8307	15.3096	3.36145e-08	3.90437e-06	Significant
OMD	OID20725	Q99983	Inflammation	Timepoint	24.9764	8.32547	3	92.2239	15.3972	3.36545e-08	3.90437e-06	Significant
CD244	OID20628	Q9BZW8	Inflammation	Timepoint	4.50105	1.50035	3	94.2121	15.2803	3.53123e-08	4.04349e-06	Significant
CSF2RA	OID20915	P15509	Neurology	Timepoint	8.51744	2.83915	3	91.3577	15.3512	3.6275e-08	4.10047e-06	Significant
FUCA1	OID20261	P04066	Cardiometabolic	Timepoint	7.3573	2.45243	3	94.8475	15.1161	4.07025e-08	4.54271e-06	Significant
ADGRG1	OID21294	Q9Y653	Oncology	Timepoint	15.6985	5.23284	3	91.4856	15.1536	4.38229e-08	4.82983e-06	Significant
CD163	OID20360	Q86VB7	Cardiometabolic	Timepoint	10.0767	3.3589	3	94.1745	14.9127	5.09094e-08	5.50598e-06	Significant
FCAR	OID20564	P24071	Inflammation	Timepoint	8.24485	2.74828	3	91.5592	14.9927	5.12068e-08	5.50598e-06	Significant
THBS2	OID21104	P35442	Neurology	Timepoint	24.6863	8.22876	3	93.8787	14.8628	5.4009e-08	5.73732e-06	Significant
HBQ1	OID21433	P09105	Oncology	Timepoint	18.5009	6.16698	3	94.4836	14.8059	5.60859e-08	5.88702e-06	Significant
MAMDC2	OID30309	Q7Z304	Cardiometabolic_II	Timepoint	10.5995	3.53315	3	93.0135	14.6807	6.65374e-08	6.86809e-06	Significant
NEFL	OID20871	P07196	Neurology	Timepoint	31.9286	10.6429	3	93.0761	14.6719	6.69905e-08	6.86809e-06	Significant
GPNMB	OID20173	Q14956	Cardiometabolic	Timepoint	6.66147	2.22049	3	94.2904	14.3898	8.56237e-08	8.67752e-06	Significant
SCPEP1	OID30278	Q9HB40	Cardiometabolic_II	Timepoint	5.91429	1.97143	3	93.1226	14.1749	1.10064e-07	1.10225e-05	Significant
FCAMR	OID30332	Q8WWV6	Cardiometabolic_II	Timepoint	25.0371	8.34569	3	94.4954	14.1244	1.11262e-07	1.10225e-05	Significant
TNFSF13B	OID20272	Q9Y275	Cardiometabolic	Timepoint	9.73182	3.24394	3	93.9627	14.0721	1.19127e-07	1.16705e-05	Significant
ITGA2	OID30570	P17301	Inflammation_II	Timepoint	6.36069	2.12023	3	94.1204	13.9585	1.3306e-07	1.28922e-05	Significant
GALNT5	OID30295	Q7Z7M9	Cardiometabolic_II	Timepoint	6.83623	2.27874	3	93.5231	13.9435	1.37434e-07	1.31713e-05	Significant
ANGPTL7	OID21412	O43827	Oncology	Timepoint	8.88064	2.96021	3	94.3184	13.9095	1.39077e-07	1.31814e-05	Significant
SRPX	OID30310	P78539	Cardiometabolic_II	Timepoint	13.3526	4.45087	3	92.5469	13.9495	1.4053e-07	1.31814e-05	Significant
MSTN	OID20115	O14793	Cardiometabolic	Timepoint	18.6522	6.21741	3	92.4053	13.9356	1.43108e-07	1.32819e-05	Significant
CEACAM21	OID20548	Q3KPI0	Inflammation	Timepoint	5.66312	1.88771	3	91.4045	13.9198	1.49755e-07	1.3754e-05	Significant
CLEC4M	OID30405	Q9H2X3	Cardiometabolic_II	Timepoint	6.58999	2.19666	3	92.8763	13.8464	1.54492e-07	1.40428e-05	Significant
KAZALD1	OID21339	Q96I82	Oncology	Timepoint	13.7461	4.58202	3	91.9986	13.7771	1.69966e-07	1.52917e-05	Significant
PLXNB2	OID20317	O15031	Cardiometabolic	Timepoint	6.38442	2.12814	3	95.4096	13.6251	1.80441e-07	1.60702e-05	Significant
C1QTNF9	OID30620	P0C862	Inflammation_II	Timepoint	5.75051	1.91684	3	91.9141	13.6768	1.88583e-07	1.66274e-05	Significant
UROD	OID30603	P06132	Inflammation_II	Timepoint	12.191	4.06366	3	93.382	13.5001	2.16665e-07	1.89142e-05	Significant
CD80	OID30291	P33681	Cardiometabolic_II	Timepoint	6.82362	2.27454	3	91.4888	13.526	2.22432e-07	1.92273e-05	Significant
CNTN5	OID21006	O94779	Neurology	Timepoint	5.93415	1.97805	3	94.1345	13.4274	2.28707e-07	1.95777e-05	Significant
CD248	OID30394	Q9HCU0	Cardiometabolic_II	Timepoint	15.6797	5.22655	3	93.7425	13.4268	2.31267e-07	1.96065e-05	Significant
KLK4	OID21391	Q9Y5K2	Oncology	progression_status	15.9839	15.9839	1	52.5841	34.9628	2.55157e-07	2.12996e-05	Significant
HAVCR1	OID21422	Q96D42	Oncology	Timepoint	14.8519	4.95062	3	91.2099	13.3938	2.56425e-07	2.12996e-05	Significant
LILRB1	OID20323	Q8NHL6	Cardiometabolic	Timepoint	5.86369	1.95456	3	94.5732	13.2945	2.59178e-07	2.12996e-05	Significant
ADA	OID20645	P00813	Inflammation	Timepoint	8.58244	2.86081	3	93.0962	13.3261	2.609e-07	2.12996e-05	Significant
LRRC25	OID21333	Q8N386	Oncology	Timepoint	9.70908	3.23636	3	93.3324	13.1851	2.99647e-07	2.42384e-05	Significant
FABP9	OID20501	Q0Z7S8	Inflammation	Timepoint	4.20509	1.4017	3	91.1494	13.2026	3.1209e-07	2.50155e-05	Significant
CST1	OID30581	P01037	Inflammation_II	Timepoint	45.8432	15.2811	3	92.314	13.1462	3.204e-07	2.54501e-05	Significant
PTPRK	OID31461	Q15262	Oncology_II	Timepoint	3.5532	1.1844	3	95.3813	12.9896	3.48068e-07	2.7401e-05	Significant
LY75	OID20580	O60449	Inflammation	Timepoint	7.301	2.43367	3	93.7576	13.0154	3.53041e-07	2.75465e-05	Significant
APOA2	OID30686	P02652	Inflammation_II	Timepoint	28.5258	9.5086	3	95.3903	12.9501	3.62581e-07	2.80428e-05	Significant
FLT4	OID21491	P35916	Oncology	Timepoint	8.62606	2.87535	3	94.6732	12.9464	3.70523e-07	2.84078e-05	Significant
EPO	OID20522	P01588	Inflammation	Timepoint	53.7594	17.9198	3	93.1406	12.9347	3.89841e-07	2.96313e-05	Significant
GFRA3	OID20933	O60609	Neurology	Timepoint	4.86263	1.62088	3	92.6511	12.892	4.1258e-07	3.09964e-05	Significant
TNR	OID20957	Q92752	Neurology	Timepoint	6.25905	2.08635	3	92.4992	12.8905	4.14832e-07	3.09964e-05	Significant
HMCN2	OID30592	Q8NDA2	Inflammation_II	Timepoint	16.3196	5.43985	3	94.1171	12.718	4.76321e-07	3.50983e-05	Significant
DAG1	OID20774	Q14118	Inflammation	Timepoint	10.4201	3.47338	3	92.9429	12.7432	4.7769e-07	3.50983e-05	Significant
PCDH17	OID20132	O14917	Cardiometabolic	Timepoint	32.1149	10.705	3	94.3337	12.6801	4.92924e-07	3.59183e-05	Significant
TEX101	OID30971	Q9BY14	Neurology_II	Timepoint	5.97656	1.99219	3	95.1383	12.5519	5.52853e-07	3.9955e-05	Significant
MSR1	OID21063	P21757	Neurology	Timepoint	8.32385	2.77462	3	92.0361	12.5954	5.6964e-07	4.08334e-05	Significant
SERPIND1	OID30767	P05546	Inflammation_II	Timepoint	5.7146	1.90487	3	93.6982	12.4915	6.09433e-07	4.33336e-05	Significant
NOS3	OID20834	P29474	Neurology	Timepoint	10.4134	3.47114	3	91.7227	12.5278	6.15815e-07	4.34371e-05	Significant
DIPK2B	OID30582	Q9H7Y0	Inflammation_II	Timepoint	7.21948	2.40649	3	95.8021	12.4077	6.33464e-07	4.43274e-05	Significant
ADAM15	OID20109	Q13444	Cardiometabolic	Timepoint	7.0999	2.36663	3	97.9166	12.3429	6.47136e-07	4.49275e-05	Significant
PGF	OID20673	P49763	Inflammation	Timepoint	5.13558	1.71186	3	92.4059	12.3686	7.14676e-07	4.90744e-05	Significant
PLTP	OID20238	P55058	Cardiometabolic	Timepoint	8.34721	2.7824	3	93.9526	12.3292	7.17999e-07	4.90744e-05	Significant
ECE1	OID20891	P42892	Neurology	Timepoint	9.12896	3.04299	3	100.432	12.1529	7.51437e-07	5.09648e-05	Significant
SERPINI2	OID31504	O75830	Oncology_II	Timepoint	18.7929	6.26429	3	93.9103	12.138	8.7863e-07	5.91365e-05	Significant
ROBO2	OID21007	Q9HCK4	Neurology	Timepoint	6.34785	2.11595	3	96.4213	12.0633	8.99479e-07	6.00811e-05	Significant
TREH	OID30388	O43280	Cardiometabolic_II	Timepoint	6.66267	2.22089	3	91.148	12.1651	9.10887e-07	6.02818e-05	Significant
ESM1	OID20758	Q9NQ30	Inflammation	Timepoint	11.1033	3.70111	3	96.6062	12.0371	9.21257e-07	6.02818e-05	Significant
DLK1	OID20295	P80370	Cardiometabolic	Timepoint	5.82622	1.94207	3	93.5649	12.0987	9.22995e-07	6.02818e-05	Significant
KDR	OID21497	P35968	Oncology	Timepoint	5.67472	1.89157	3	94.5414	12.0086	9.93093e-07	6.42551e-05	Significant
KRT19	OID20596	P08727	Inflammation	Timepoint	58.8266	19.6089	3	92.8661	12.0379	9.99843e-07	6.42551e-05	Significant
ITGAM	OID21071	P11215	Neurology	Timepoint	7.09397	2.36466	3	93.7521	12.0133	1.00569e-06	6.42551e-05	Significant
CLUL1	OID20198	Q15846	Cardiometabolic	Timepoint	8.08318	2.69439	3	92.0496	11.9963	1.06424e-06	6.75068e-05	Significant
ACE	OID30696	P12821	Inflammation_II	Timepoint	5.04781	1.6826	3	98.1505	11.8596	1.07823e-06	6.79056e-05	Significant
COL1A1	OID20335	P02452	Cardiometabolic	Timepoint	7.59302	2.53101	3	91.5513	11.9623	1.11569e-06	6.97662e-05	Significant
FSTL1	OID30254	Q12841	Cardiometabolic_II	Timepoint	2.84057	0.946856	3	94.0087	11.8262	1.21895e-06	7.56863e-05	Significant
CDCP1	OID20940	Q9H5V8	Neurology	Timepoint	8.29027	2.76342	3	91.4385	11.8077	1.31599e-06	8.11402e-05	Significant
AGER	OID20756	Q15109	Inflammation	Timepoint	7.21516	2.40505	3	93.6217	11.6601	1.4662e-06	8.97743e-05	Significant
SEZ6L	OID21488	Q9BYH1	Oncology	Timepoint	8.0037	2.6679	3	94.6917	11.6313	1.47805e-06	8.98759e-05	Significant
APCS	OID30778	P02743	Inflammation_II	Timepoint	9.92307	3.30769	3	95.6468	11.5741	1.54064e-06	9.30398e-05	Significant
CD276	OID20680	Q5ZPR3	Inflammation	Timepoint	6.41831	2.13944	3	92.8316	11.4319	1.90082e-06	0.000114011	Significant
NTRK2	OID20136	Q16620	Cardiometabolic	Timepoint	6.5048	2.16827	3	96.5481	11.33	1.96743e-06	0.000117208	Significant
ERN1	OID31391	O75460	Oncology_II	Timepoint	3.53438	1.17813	3	94.0557	11.3638	1.9932e-06	0.000117947	Significant
VNN2	OID21310	O95498	Oncology	Timepoint	6.29649	2.09883	3	93.1096	11.3518	2.05854e-06	0.000121001	Significant
SIGLEC1	OID20690	Q9BZZ2	Inflammation	Timepoint	9.56886	3.18962	3	93.5002	11.3295	2.09132e-06	0.000122114	Significant
TNXB	OID21107	P22105	Neurology	Timepoint	5.56144	1.85381	3	93.8314	11.3082	2.12527e-06	0.00012328	Significant
CHI3L1	OID20399	P36222	Cardiometabolic	Timepoint	18.7996	6.26654	3	92.4683	11.2873	2.23465e-06	0.000128777	Significant
FABP9	OID20501	Q0Z7S8	Inflammation	Timepoint:progression_status	3.59932	1.19977	3	91.1562	11.3007	2.26418e-06	0.000129632	Significant
MDGA1	OID20951	Q8NFP4	Neurology	Timepoint	6.41792	2.13931	3	91.575	11.0653	2.88543e-06	0.000164134	Significant
FGFBP3	OID31108	Q8TAT2	Neurology_II	Timepoint	6.38793	2.12931	3	94.5128	10.8748	3.34546e-06	0.000189083	Significant
CHL1	OID20366	O00533	Cardiometabolic	Timepoint	3.80464	1.26821	3	92.3629	10.8855	3.44554e-06	0.000193499	Significant
IL17F	OID20456	Q96PD4	Inflammation	Timepoint	10.831	3.61034	3	92.1091	10.831	3.67188e-06	0.000204905	Significant
SELE	OID20290	P16581	Cardiometabolic	Timepoint	9.19813	3.06604	3	91.64	10.7993	3.83389e-06	0.0002126	Significant
DUT	OID31457	P33316	Oncology_II	Timepoint	11.4983	3.83276	3	94.8547	10.6972	4.03181e-06	0.000222178	Significant
TLR1	OID30532	Q15399	Inflammation_II	Timepoint	6.16059	2.05353	3	94.9685	10.5507	4.72038e-06	0.000258507	Significant
ORM1	OID30768	P02763	Inflammation_II	Timepoint	2.70316	0.901054	3	95.1091	10.4393	5.31926e-06	0.000289505	Significant
ITGB2	OID20315	P05107	Cardiometabolic	Timepoint	5.00197	1.66732	3	93.9682	10.4485	5.37137e-06	0.000290548	Significant
OSCAR	OID20776	Q8IYS5	Inflammation	Timepoint	6.22339	2.07446	3	93.2129	10.3987	5.7476e-06	0.000309003	Significant
XPNPEP2	OID21508	O43895	Oncology	Timepoint	9.51427	3.17142	3	90.6705	10.4184	5.89182e-06	0.000313307	Significant
NCAM1	OID20354	P13591	Cardiometabolic	Timepoint	4.83629	1.6121	3	94.3641	10.3547	5.91057e-06	0.000313307	Significant
ITGB1	OID20376	P05556	Cardiometabolic	Timepoint	3.05023	1.01674	3	96.4333	10.3193	5.93425e-06	0.000313307	Significant
FGFR4	OID30646	P22455	Inflammation_II	Timepoint	7.77362	2.59121	3	91.198	10.3901	6.01647e-06	0.000315757	Significant
ALPI	OID30497	P09923	Inflammation_II	Timepoint	18.4594	6.15312	3	91.7735	10.3456	6.24876e-06	0.000326008	Significant
IL18BP	OID20348	O95998	Cardiometabolic	Timepoint	5.34767	1.78256	3	92.653	10.3139	6.36738e-06	0.000330242	Significant
LTBP2	OID20254	Q14767	Cardiometabolic	Timepoint	11.2151	3.73838	3	95.5748	10.2561	6.45337e-06	0.000332745	Significant
MFGE8	OID21134	Q08431	Neurology	Timepoint	4.87949	1.6265	3	93.748	10.2241	6.89277e-06	0.000353335	Significant
CXCL3	OID20788	P19876	Inflammation	Timepoint	31.1773	10.3924	3	95.3257	10.1939	6.93954e-06	0.000353676	Significant
B3GNT7	OID30281	Q8NFL0	Cardiometabolic_II	Timepoint	7.96514	2.65505	3	93.7427	10.1357	7.59497e-06	0.000383568	Significant
PECAM1	OID21131	P16284	Neurology	Timepoint	2.85568	0.951895	3	92.8784	10.1469	7.61307e-06	0.000383568	Significant
HGF	OID20656	P14210	Inflammation	Timepoint	6.92949	2.30983	3	93.683	10.1221	7.71716e-06	0.000386603	Significant
LRTM2	OID31020	Q8N967	Neurology_II	Timepoint	1.84226	0.614085	3	94.535	10.0898	7.88433e-06	0.000392746	Significant
TLR3	OID20612	O15455	Inflammation	Timepoint	3.5598	1.1866	3	90.9162	10.0611	8.64996e-06	0.000428465	Significant
ROBO1	OID20734	Q9Y6N7	Inflammation	Timepoint	5.96175	1.98725	3	94.8185	9.96907	8.96628e-06	0.000441652	Significant
LEP	OID20187	P41159	Cardiometabolic	Timepoint:progression_status	16.6225	5.54083	3	92.8569	9.98695	9.07693e-06	0.000444618	Significant
F2	OID30723	P00734	Inflammation_II	Timepoint	1.51408	0.504693	3	96.0641	9.89239	9.57198e-06	0.000466277	Significant
LILRB2	OID20301	Q8N423	Cardiometabolic	Timepoint	4.33256	1.44419	3	92.3988	9.93809	9.65095e-06	0.000467541	Significant
LY9	OID20670	Q9HBG7	Inflammation	Timepoint	3.71279	1.2376	3	93.596	9.90842	9.77774e-06	0.000471095	Significant
NGRN	OID31115	Q9NPE2	Neurology_II	Timepoint	2.44699	0.815665	3	95.8679	9.83186	1.02687e-05	0.000488979	Significant
BCHE	OID30717	P06276	Inflammation_II	Timepoint	3.61277	1.20426	3	93.4692	9.86511	1.02773e-05	0.000488979	Significant
GZMH	OID20096	P20718	Cardiometabolic	Timepoint	10.2586	3.41953	3	93.2365	9.86517	1.03153e-05	0.000488979	Significant
SFTPD	OID20214	P35247	Cardiometabolic	Timepoint	14.2671	4.7557	3	92.443	9.85167	1.06057e-05	0.000500058	Significant
ULBP2	OID20919	Q9BZM5	Neurology	Timepoint	6.78189	2.26063	3	91.767	9.84382	1.08173e-05	0.00050732	Significant
SERPINA12	OID20219	Q8IW75	Cardiometabolic	Timepoint	6.35981	2.11994	3	90.0686	9.85976	1.09377e-05	0.00051025	Significant
POF1B	OID30504	Q8WVV4	Inflammation_II	Timepoint	9.8701	3.29003	3	96.6415	9.74177	1.12202e-05	0.000520677	Significant
SIAE	OID21503	Q9HAT2	Oncology	Timepoint	5.30269	1.76756	3	93.5666	9.72816	1.1939e-05	0.000551131	Significant
SLC39A5	OID20539	Q6ZMH5	Inflammation	Timepoint	13.0502	4.35008	3	93.9707	9.65923	1.28066e-05	0.000588102	Significant
CRELD1	OID30619	Q96HD1	Inflammation_II	Timepoint	7.25092	2.41697	3	94.4938	9.64373	1.29254e-05	0.000590482	Significant
CILP	OID30399	O75339	Cardiometabolic_II	Timepoint	15.7683	5.25611	3	98.041	9.57357	1.32725e-05	0.000601672	Significant
CSF1R	OID30681	P07333	Inflammation_II	Timepoint	11.6535	3.8845	3	96.0309	9.59706	1.33068e-05	0.000601672	Significant
C1QTNF6	OID31049	Q9BXI9	Neurology_II	Timepoint	11.756	3.91866	3	98.5136	9.54263	1.36516e-05	0.000614114	Significant
PTN	OID20083	P21246	Cardiometabolic	Timepoint	31.1973	10.3991	3	98.5491	9.53195	1.38098e-05	0.000618078	Significant
SOD3	OID30683	P08294	Inflammation_II	Timepoint	4.60326	1.53442	3	91.4621	9.6192	1.39233e-05	0.000620011	Significant
ITGA5	OID21139	P08648	Neurology	Timepoint	5.46073	1.82024	3	94.4846	9.50544	1.50791e-05	0.000666536	Significant
CD300C	OID21010	Q08708	Neurology	Timepoint	5.68947	1.89649	3	92.7341	9.52676	1.51193e-05	0.000666536	Significant
SORT1	OID20213	Q99523	Cardiometabolic	Timepoint	6.91873	2.30624	3	96.9238	9.46579	1.52175e-05	0.000667526	Significant
GZMA	OID20663	P12544	Inflammation	Timepoint	5.02097	1.67366	3	92.8628	9.50389	1.54777e-05	0.000675581	Significant
CD48	OID20692	P09326	Inflammation	Timepoint	4.17187	1.39062	3	94.5039	9.46652	1.57438e-05	0.000683806	Significant
IGDCC4	OID30402	Q8TDY8	Cardiometabolic_II	Timepoint	3.14487	1.04829	3	92.9	9.45218	1.63839e-05	0.000708122	Significant
SIGLEC10	OID20537	Q96LC7	Inflammation	Timepoint	4.63169	1.5439	3	92.1963	9.44666	1.66618e-05	0.00071662	Significant
ACRV1	OID30513	P26436	Inflammation_II	Timepoint	9.14909	3.0497	3	93.3204	9.41114	1.70422e-05	0.000729421	Significant
ANGPTL1	OID20211	O95841	Cardiometabolic	Timepoint	4.51969	1.50656	3	95.1728	9.35145	1.77337e-05	0.000754575	Significant
SFRP1	OID20984	Q8N474	Neurology	Timepoint	31.0826	10.3609	3	98.3021	9.30733	1.78501e-05	0.000754575	Significant
CTSD	OID20358	P07339	Cardiometabolic	Timepoint	4.59442	1.53147	3	93.2892	9.36817	1.78866e-05	0.000754575	Significant
RBM17	OID31034	Q96I25	Neurology_II	Timepoint:progression_status	12.7411	4.24704	3	101.625	9.23495	1.85656e-05	0.00077949	Significant
TF	OID30783	P02787	Inflammation_II	Timepoint	3.01999	1.00666	3	96.9524	9.22286	1.99946e-05	0.000835509	Significant
LGALS4	OID20748	P56470	Inflammation	Timepoint	13.6882	4.56272	3	92.7107	9.22705	2.11153e-05	0.000878176	Significant
DPP7	OID20142	Q9UHL4	Cardiometabolic	Timepoint	5.73678	1.91226	3	91.8544	9.23081	2.12921e-05	0.000881371	Significant
VCAN	OID21026	P13611	Neurology	Timepoint	10.6636	3.55453	3	96.8092	9.15318	2.16722e-05	0.000892915	Significant
SPON1	OID20759	Q9HCB6	Inflammation	Timepoint	7.38518	2.46173	3	94.2573	9.16137	2.22324e-05	0.00090894	Significant
IL1R2	OID20757	P27930	Inflammation	Timepoint	2.96745	0.98915	3	91.5781	9.19399	2.22744e-05	0.00090894	Significant
CCL15	OID20328	Q16663	Cardiometabolic	Timepoint	6.71137	2.23712	3	93.8794	9.16056	2.23704e-05	0.00090894	Significant
KRT5	OID20860	P13647	Neurology	Timepoint	27.9602	9.32007	3	97.3021	9.10609	2.27096e-05	0.000918488	Significant
MYOC	OID21121	Q99972	Neurology	Timepoint	15.5996	5.19987	3	101.446	9.04328	2.31571e-05	0.000929208	Significant
SLC16A1	OID20799	P53985	Neurology	Timepoint	15.3425	5.11417	3	91.4158	9.16017	2.31854e-05	0.000929208	Significant
NHLRC3	OID30614	Q5JS37	Inflammation_II	Timepoint	6.78066	2.26022	3	95.3649	9.04617	2.49306e-05	0.000994628	Significant
GHR	OID30574	P10912	Inflammation_II	progression_status	2.31963	2.31963	1	55.8008	20.9987	2.62929e-05	0.00104426	Significant
STX7	OID30560	O15400	Inflammation_II	Timepoint	7.59606	2.53202	3	93.192	9.01639	2.65528e-05	0.00104891	Significant
MMP12	OID21439	P39900	Oncology	Timepoint	14.1384	4.7128	3	93.1244	9.01403	2.66481e-05	0.00104891	Significant
PGF	OID20673	P49763	Inflammation	Timepoint:progression_status	3.73047	1.24349	3	92.4201	8.98452	2.78159e-05	0.00109001	Significant
DSCAM	OID30993	O60469	Neurology_II	Timepoint	3.79984	1.26661	3	92.6715	8.9668	2.82761e-05	0.00110314	Significant
PRND	OID31124	Q9UKY0	Neurology_II	Timepoint:progression_status	9.93924	3.31308	3	92.799	8.90899	3.01216e-05	0.00116997	Significant
TNFRSF4	OID20653	P43489	Inflammation	Timepoint	4.78983	1.59661	3	92.8935	8.88396	3.0942e-05	0.00119656	Significant
CR2	OID20393	P20023	Cardiometabolic	Timepoint	4.99787	1.66596	3	92.2073	8.88355	3.1247e-05	0.00120308	Significant
ITGBL1	OID30408	O95965	Cardiometabolic_II	Timepoint	4.91831	1.63944	3	93.2185	8.86022	3.16421e-05	0.00121299	Significant
EGFLAM	OID31496	Q63HQ2	Oncology_II	Timepoint	6.52651	2.1755	3	94.6036	8.78652	3.377e-05	0.00128497	Significant
NCAM2	OID21095	O15394	Neurology	Timepoint	4.23094	1.41031	3	93.717	8.79561	3.38113e-05	0.00128497	Significant
TPP1	OID20750	O14773	Inflammation	Timepoint	9.00041	3.00014	3	95.905	8.74909	3.46591e-05	0.00131154	Significant
REG4	OID20784	Q9BYZ8	Inflammation	Timepoint	18.546	6.18199	3	92.1668	8.78715	3.48449e-05	0.00131294	Significant
SERPINA7	OID30724	P05543	Inflammation_II	Timepoint	1.8918	0.630598	3	94.6499	8.71992	3.63961e-05	0.00136555	Significant
SUSD2	OID21098	Q9UGT4	Neurology	Timepoint	3.34634	1.11545	3	92.6577	8.69503	3.84087e-05	0.00143496	Significant
SFTPA2	OID21218	Q8IWL1	Oncology	Timepoint	9.33179	3.1106	3	94.5085	8.66538	3.87885e-05	0.00144303	Significant
HBZ	OID30307	P02008	Cardiometabolic_II	Timepoint	5.46776	1.82259	3	91.1296	8.69808	3.90606e-05	0.00144705	Significant
ADIPOQ	OID30748	Q15848	Inflammation_II	Timepoint	5.06916	1.68972	3	93.0548	8.62058	4.15686e-05	0.00153352	Significant
AGR2	OID20896	O95994	Neurology	Timepoint	69.085	23.0283	3	95.7512	8.53801	4.41615e-05	0.00162238	Significant
CD276	OID20680	Q5ZPR3	Inflammation	progression_status	3.64553	3.64553	1	56.0858	19.4795	4.6755e-05	0.00170948	Significant
NID1	OID20362	P14543	Cardiometabolic	Timepoint	5.87733	1.95911	3	94.7668	8.49526	4.692e-05	0.00170948	Significant
RBM17	OID31034	Q96I25	Neurology_II	Timepoint	11.6205	3.87351	3	101.585	8.42273	4.72184e-05	0.00171302	Significant
LYPD3	OID21530	O95274	Oncology	Timepoint	4.07121	1.35707	3	91.1281	8.52635	4.74059e-05	0.00171302	Significant
GALNT2	OID21423	Q10471	Oncology	Timepoint	2.79933	0.933109	3	93.3902	8.49601	4.76758e-05	0.00171574	Significant
CD1C	OID21483	P29017	Oncology	Timepoint	2.74401	0.91467	3	91.8536	8.49041	4.8914e-05	0.00175315	Significant
CDH17	OID20134	Q12864	Cardiometabolic	Timepoint	22.9156	7.63855	3	93.0129	8.45525	5.01694e-05	0.00179086	Significant
SPINT3	OID31509	P49223	Oncology_II	Timepoint:progression_status	13.0034	4.33448	3	91.4658	8.4315	5.25465e-05	0.0018647	Significant
TMPRSS15	OID21364	P98073	Oncology	Timepoint	17.6638	5.88792	3	100.868	8.33503	5.26609e-05	0.0018647	Significant
UBAC1	OID21336	Q9BSL1	Oncology	Timepoint	3.81877	1.27292	3	94.8585	8.37099	5.40112e-05	0.00190187	Significant
F9	OID20349	P00740	Cardiometabolic	Timepoint	3.78619	1.26206	3	96.2979	8.35433	5.4142e-05	0.00190187	Significant
ASPN	OID30315	Q9BXN1	Cardiometabolic_II	Timepoint	4.12748	1.37583	3	94.8579	8.34886	5.53957e-05	0.00193819	Significant
NID2	OID21085	Q14112	Neurology	Timepoint	8.77027	2.92342	3	101.696	8.27802	5.57805e-05	0.00194394	Significant
PI16	OID30676	Q6UXB8	Inflammation_II	Timepoint	2.1551	0.718368	3	95.3688	8.279	5.96555e-05	0.00206796	Significant
TNFSF11	OID20592	O14788	Inflammation	Timepoint	10.8595	3.61982	3	94.9146	8.28131	5.98083e-05	0.00206796	Significant
PAPPA	OID20421	Q13219	Inflammation	Timepoint	11.8833	3.96109	3	93.7274	8.23345	6.40492e-05	0.00220594	Significant
IDUA	OID21468	P35475	Oncology	Timepoint	4.47381	1.49127	3	96.1705	8.20505	6.43601e-05	0.00220803	Significant
MEGF10	OID20746	Q96KG7	Inflammation	Timepoint	4.86472	1.62157	3	92.3064	8.24024	6.4629e-05	0.00220866	Significant
FCRL3	OID20443	Q96P31	Inflammation	Timepoint	16.0982	5.36607	3	93.9856	8.20626	6.58752e-05	0.00224255	Significant
CEACAM5	OID21171	P06731	Oncology	progression_status	29.8858	29.8858	1	55.4711	18.486	6.98437e-05	0.00236851	Significant
TNFSF14	OID20953	O43557	Neurology	Timepoint	10.2257	3.40855	3	95.8969	8.09595	7.31915e-05	0.00247253	Significant
SPINT3	OID31509	P49223	Oncology_II	Timepoint	12.5008	4.16694	3	91.4575	8.10561	7.61151e-05	0.00255987	Significant
FGFR2	OID21478	P21802	Oncology	Timepoint	2.92927	0.976423	3	89.9556	8.11862	7.63577e-05	0.00255987	Significant
DDHD2	OID31043	O94830	Neurology_II	Timepoint	7.67485	2.55828	3	94.903	8.01024	8.16614e-05	0.00272731	Significant
HPGDS	OID21266	O60760	Oncology	Timepoint	7.791	2.597	3	95.2386	7.99744	8.25752e-05	0.00274742	Significant
CGA	OID21069	P01215	Neurology	Timepoint	10.3116	3.43719	3	93.4905	7.99467	8.4435e-05	0.00279874	Significant
CRYBB1	OID30319	P53674	Cardiometabolic_II	Timepoint	5.45494	1.81831	3	95.3997	7.953	8.677e-05	0.00286536	Significant
USP8	OID20110	P40818	Cardiometabolic	Timepoint	20.2982	6.76607	3	94.2765	7.95267	8.78539e-05	0.00289033	Significant
LEO1	OID30991	Q8WVC0	Neurology_II	Timepoint:progression_status	15.8843	5.29478	3	92.8974	7.96074	8.83692e-05	0.00289647	Significant
ITGAV	OID21416	P06756	Oncology	Timepoint	2.57949	0.859831	3	94.3655	7.87957	9.54849e-05	0.00311525	Significant
NECTIN1	OID30545	Q15223	Inflammation_II	Timepoint	2.64914	0.883046	3	98.8899	7.83754	9.57507e-05	0.00311525	Significant
ACP5	OID20314	P13686	Cardiometabolic	Timepoint	3.93915	1.31305	3	93.0471	7.88301	9.64651e-05	0.00312696	Significant
CDNF	OID21318	Q49AH0	Oncology	Timepoint	3.99949	1.33316	3	96.795	7.81161	0.000100741	0.00325359	Significant
IL17D	OID20481	Q8TAD2	Inflammation	Timepoint	5.28901	1.763	3	94.5666	7.81881	0.000102206	0.00328887	Significant
ISLR2	OID20889	Q6UXK2	Neurology	Timepoint	5.95223	1.98408	3	96.0932	7.79934	0.000102909	0.00329944	Significant
CCN4	OID21444	O95388	Oncology	Timepoint	5.49265	1.83088	3	92.4175	7.79554	0.000107408	0.00343123	Significant
CEACAM8	OID20102	P31997	Cardiometabolic	Timepoint	8.6035	2.86783	3	95.4017	7.76355	0.000108022	0.00343838	Significant
APOBR	OID30246	Q0VD83	Cardiometabolic_II	Timepoint	0.90002	0.300007	3	94.19	7.7561	0.000110319	0.00349885	Significant
VNN1	OID30711	O95497	Inflammation_II	Timepoint	4.15686	1.38562	3	90.8638	7.78361	0.000110758	0.0035002	Significant
CD300E	OID21418	Q496F6	Oncology	Timepoint	5.08709	1.6957	3	92.8012	7.74488	0.000113396	0.00357074	Significant
NPL	OID30329	Q9BXD5	Cardiometabolic_II	Timepoint	15.335	5.11166	3	94.7486	7.70635	0.00011619	0.00364573	Significant
CBX2	OID30177	Q14781	Cardiometabolic_II	Timepoint:progression_status	4.13302	1.37767	3	102.785	7.63691	0.000116874	0.00365417	Significant
RARRES1	OID21177	P49788	Oncology	progression_status	2.18795	2.18795	1	58.7678	17.0068	0.000118708	0.0036984	Significant
CRHBP	OID20747	P24387	Inflammation	Timepoint	7.8919	2.63063	3	98.1031	7.65096	0.000119926	0.0037232	Significant
NDUFA5	OID30520	Q16718	Inflammation_II	Timepoint	4.00184	1.33395	3	95.5104	7.6662	0.000120804	0.00373119	Significant
CPB2	OID30734	Q96IY4	Inflammation_II	Timepoint	3.31746	1.10582	3	97.0104	7.65202	0.00012103	0.00373119	Significant
C1QA	OID20654	P02745	Inflammation	Timepoint	1.09677	0.365592	3	93.5017	7.67197	0.000122456	0.00376201	Significant
CRIM1	OID20701	Q9NZV1	Inflammation	Timepoint	4.50916	1.50305	3	95.6411	7.64888	0.0001231	0.00376867	Significant
ADGRG2	OID20189	Q8IZP9	Cardiometabolic	Timepoint	4.47999	1.49333	3	94.9723	7.64736	0.000124137	0.00378724	Significant
SIGLEC9	OID21390	Q9Y336	Oncology	Timepoint	1.36209	0.454029	3	93.0585	7.64402	0.000127056	0.00386295	Significant
KYAT1	OID20232	Q16773	Cardiometabolic	Timepoint	11.9062	3.96874	3	96.0523	7.6085	0.000128502	0.00389349	Significant
ICAM3	OID20277	P32942	Cardiometabolic	Timepoint	2.77721	0.925736	3	92.4161	7.62414	0.000130874	0.00395177	Significant
SIGLEC6	OID21394	O43699	Oncology	Timepoint	2.86399	0.954662	3	94.2266	7.59349	0.000133128	0.0040061	Significant
CTSE	OID30628	P14091	Inflammation_II	Timepoint	7.03608	2.34536	3	95.2575	7.57818	0.000134148	0.00402306	Significant
HSD17B14	OID31098	Q9BPX1	Neurology_II	Timepoint	19.1589	6.38629	3	95.7128	7.55769	0.00013678	0.0040881	Significant
ERBB4	OID21510	Q15303	Oncology	Timepoint	2.83109	0.943697	3	94.5883	7.56026	0.000137869	0.00410674	Significant
AREG	OID21357	P15514	Oncology	progression_status	9.55465	9.55465	1	59.0012	16.622	0.00013843	0.00410956	Significant
BAG6	OID20114	P46379	Cardiometabolic	Timepoint	5.84334	1.94778	3	95.2934	7.53714	0.000140658	0.00415522	Significant
SPINK2	OID30627	P20155	Inflammation_II	Timepoint	12.1061	4.03537	3	94.2348	7.54446	0.000140911	0.00415522	Significant
CPE	OID21392	P16870	Oncology	Timepoint	9.02294	3.00765	3	97.1359	7.5144	0.000141945	0.00417176	Significant
ANGPTL3	OID20407	Q9Y5C1	Cardiometabolic	Timepoint	4.38566	1.46189	3	96.5771	7.51587	0.00014244	0.00417241	Significant
SDC4	OID20216	P31431	Cardiometabolic	Timepoint	18.3234	6.1078	3	96.3257	7.51095	0.0001436	0.00419245	Significant
FABP9	OID20501	Q0Z7S8	Inflammation	progression_status	1.80997	1.80997	1	47.784	17.0481	0.000145348	0.00422949	Significant
IL17A	OID20469	Q16552	Inflammation	Timepoint	21.2065	7.06882	3	94.9705	7.49784	0.0001477	0.00428378	Significant
TFPI2	OID21512	P48307	Oncology	Timepoint	9.17587	3.05862	3	91.3563	7.51608	0.000149904	0.00433346	Significant
MMP9	OID21103	P14780	Neurology	Timepoint	12.8942	4.29806	3	95.9775	7.47117	0.000150914	0.00434079	Significant
TNFSF11	OID20592	O14788	Inflammation	progression_status	7.1345	7.1345	1	61.3703	16.3221	0.000151142	0.00434079	Significant
PTPRH	OID31433	Q9HD43	Oncology_II	Timepoint	4.21615	1.40538	3	92.8032	7.48585	0.000152981	0.00437932	Significant
RAB33A	OID30122	Q14088	Cardiometabolic_II	progression_status	1.54199	1.54199	1	132	15.1121	0.000159697	0.00455678	Significant
OCLN	OID31069	Q16625	Neurology_II	Timepoint	16.0314	5.34379	3	93.8343	7.416	0.00016424	0.00467131	Significant
GADD45GIP1	OID30237	Q8TAE8	Cardiometabolic_II	Timepoint	3.54799	1.18266	3	94.6676	7.40075	0.000165861	0.00470225	Significant
TNC	OID20359	P24821	Cardiometabolic	Timepoint	5.87332	1.95777	3	95.3657	7.38251	0.000168327	0.00475686	Significant
CD58	OID20716	P19256	Inflammation	Timepoint	2.40798	0.802658	3	93.9175	7.39042	0.000169067	0.00476251	Significant
ADGRF5	OID30349	Q8IZF2	Cardiometabolic_II	Timepoint	2.82694	0.942313	3	95.5655	7.37093	0.000170304	0.00478208	Significant
CD22	OID20637	P20273	Inflammation	Timepoint	2.23864	0.746214	3	92.1235	7.39085	0.000171948	0.00481292	Significant
KLRK1	OID31082	P26718	Neurology_II	Timepoint	5.35395	1.78465	3	94.2042	7.36799	0.000173071	0.00482901	Significant
EPCAM	OID20743	P16422	Inflammation	Timepoint	10.6344	3.54479	3	92.4734	7.36544	0.000176488	0.0049088	Significant
FCRL6	OID20529	Q6DN72	Inflammation	Timepoint	4.6782	1.5594	3	91.5192	7.36539	0.00017816	0.00493974	Significant
NOTCH2	OID30407	Q04721	Cardiometabolic_II	Timepoint	2.67494	0.891648	3	92.0449	7.30813	0.000189421	0.0052355	Significant
IGFBP1	OID20246	P08833	Cardiometabolic	Timepoint	30.8234	10.2745	3	99.0815	7.23175	0.000194443	0.00535752	Significant
GLA	OID30594	P06280	Inflammation_II	Timepoint	5.3319	1.7773	3	95.2289	7.25372	0.000195922	0.00538144	Significant
CCN3	OID20299	P48745	Cardiometabolic	Timepoint	3.43151	1.14384	3	95.5158	7.24579	0.000197242	0.00540086	Significant
GLO1	OID20107	Q04760	Cardiometabolic	Timepoint	9.16261	3.0542	3	94.1625	7.24725	0.000199329	0.00544114	Significant
AMY1A_AMY1B_AMY1C	OID30707	P0DUB6_P0DTE7_P0DTE8	Inflammation_II	Timepoint	4.06207	1.35402	3	93.7181	7.24702	0.000200199	0.005448	Significant
MTHFD2	OID31078	P13995	Neurology_II	Timepoint	1.32346	0.441155	3	96.3025	7.21777	0.000202418	0.00549143	Significant
ANXA2	OID30263	P07355	Cardiometabolic_II	Timepoint	10.3577	3.45258	3	94.0645	7.22903	0.000203799	0.00551195	Significant
CD70	OID20599	P32970	Inflammation	Timepoint	5.96216	1.98739	3	94.3411	7.21054	0.000207729	0.00560106	Significant
IL13RA1	OID21504	P78552	Oncology	Timepoint	2.86057	0.953523	3	95.2308	7.1748	0.000214891	0.00577652	Significant
CD300LF	OID21469	Q8TDQ1	Oncology	Timepoint	3.73404	1.24468	3	91.031	7.20434	0.000215792	0.0057831	Significant
SCG2	OID21400	P13521	Oncology	progression_status	2.78513	2.78513	1	65.0202	15.2643	0.000225204	0.00600025	Significant
GP6	OID21091	Q9HCN6	Neurology	Timepoint	5.85165	1.95055	3	93.8908	7.14353	0.000225578	0.00600025	Significant
CASP4	OID31276	P49662	Oncology_II	Timepoint	6.22724	2.07575	3	92.1597	7.1557	0.000225937	0.00600025	Significant
SGSH	OID30341	P51688	Cardiometabolic_II	Timepoint	2.18174	0.727246	3	92.8624	7.12435	0.000232845	0.00616514	Significant
CNTN4	OID21117	Q8IWV2	Neurology	Timepoint	2.74896	0.916319	3	94.9406	7.10526	0.000233745	0.00617046	Significant
PDE5A	OID30584	O76074	Inflammation_II	Timepoint	4.41484	1.47161	3	93.6494	7.10881	0.000235439	0.00619662	Significant
PTPRM	OID20598	P28827	Inflammation	Timepoint	2.98042	0.993475	3	94.0308	7.06609	0.000246685	0.00647328	Significant
KRT19	OID20596	P08727	Inflammation	Timepoint:progression_status	34.5436	11.5145	3	92.8843	7.06875	0.000248428	0.00649966	Significant
S100A12	OID21374	P80511	Oncology	Timepoint	34.6176	11.5392	3	95.5782	7.03426	0.000252692	0.00658278	Significant
LTA	OID20586	P01374	Inflammation	Timepoint	4.04442	1.34814	3	94.3332	7.04196	0.000253098	0.00658278	Significant
WFIKKN1	OID20939	Q96NZ8	Neurology	Timepoint	3.30263	1.10088	3	91.3109	7.05934	0.000254789	0.00660727	Significant
SLAMF8	OID21214	Q9P0V8	Oncology	Timepoint	10.3454	3.44846	3	93.0785	7.03982	0.000256536	0.00661904	Significant
CLEC1B	OID21061	Q9P126	Neurology	Timepoint	8.02532	2.67511	3	95.3843	7.02213	0.000256744	0.00661904	Significant
APOA4	OID30733	P06727	Inflammation_II	Timepoint	5.5935	1.8645	3	95.3881	7.01683	0.00025834	0.00663467	Significant
SPACA5_SPACA5B	OID30990	Q96QH8	Neurology_II	Timepoint	2.40891	0.802969	3	94.7989	7.01939	0.000258855	0.00663467	Significant
MILR1	OID20482	Q7Z6M3	Inflammation	Timepoint	16.8357	5.61189	3	92.9213	7.02726	0.000260697	0.00666252	Significant
PCDH9	OID31516	Q9HC56	Oncology_II	Timepoint	9.32432	3.10811	3	96.4291	6.99508	0.000262754	0.00669568	Significant
CD5L	OID30775	O43866	Inflammation_II	Timepoint	2.71806	0.90602	3	95.6981	6.98619	0.000267135	0.00676874	Significant
IL7	OID20535	P13232	Inflammation	Timepoint	8.54423	2.84808	3	93.7424	7.00024	0.000267157	0.00676874	Significant
SH2D1A	OID20514	O60880	Inflammation	Timepoint	15.3725	5.12417	3	97.3837	6.96804	0.00026918	0.00680046	Significant
CPM	OID21054	P14384	Neurology	Timepoint:progression_status	4.58941	1.5298	3	93.9049	6.95671	0.00028077	0.00707299	Significant
AGR2	OID20896	O95994	Neurology	Timepoint:progression_status	56.1458	18.7153	3	95.7771	6.9389	0.000282258	0.00709022	Significant
MARCO	OID20210	Q9UEW3	Cardiometabolic	Timepoint	2.84798	0.949327	3	94.7989	6.93521	0.000285791	0.00714924	Significant
KCTD5	OID31148	Q9NXV2	Neurology_II	Timepoint	11.5877	3.86257	3	93.1162	6.94607	0.000286229	0.00714924	Significant
GALNT10	OID21371	Q86SR1	Oncology	Timepoint	3.80867	1.26956	3	97.4131	6.9095	0.000288406	0.00716651	Significant
BGLAP	OID30389	P02818	Cardiometabolic_II	Timepoint:progression_status	17.9351	5.97836	3	95.4032	6.92083	0.000289222	0.00716651	Significant
CLEC4A	OID20573	Q9UMR7	Inflammation	Timepoint	2.40008	0.800028	3	94.1791	6.92908	0.000289359	0.00716651	Significant
DCTPP1	OID20148	Q9H773	Cardiometabolic	Timepoint	10.7102	3.57007	3	92.2867	6.9349	0.000292099	0.00720617	Significant
TNFRSF6B	OID20964	O95407	Neurology	Timepoint	8.90935	2.96978	3	92.6028	6.93075	0.000292715	0.00720617	Significant
PINLYP	OID30651	A6NC86	Inflammation_II	Timepoint	6.81893	2.27298	3	97.468	6.89459	0.000293412	0.00720617	Significant
LEO1	OID30991	Q8WVC0	Neurology_II	Timepoint	13.78	4.59334	3	92.8783	6.90612	0.000300576	0.00735615	Significant
ITGAL	OID30537	P20701	Inflammation_II	Timepoint	16.4266	5.47554	3	99.9654	6.85645	0.000301188	0.00735615	Significant
C7orf50	OID31095	Q9BRJ6	Neurology_II	Timepoint	1.81239	0.60413	3	99.3686	6.85249	0.000303961	0.00740339	Significant
WDR46	OID31389	O15213	Oncology_II	Timepoint	3.93908	1.31303	3	94.5352	6.86752	0.000310179	0.00753401	Significant
PAEP	OID20925	P09466	Neurology	Timepoint	39.9098	13.3033	3	94.5786	6.84631	0.000317912	0.00768997	Significant
MYDGF	OID30313	Q969H8	Cardiometabolic_II	Timepoint	5.8216	1.94053	3	92.6014	6.85771	0.000318902	0.00768997	Significant
VEGFA	OID20650	P15692	Inflammation	Timepoint	4.32084	1.44028	3	93.8835	6.8477	0.000319216	0.00768997	Significant
TAX1BP1	OID31075	Q86VP1	Neurology_II	progression_status	5.07409	5.07409	1	63.0567	14.3645	0.00033921	0.00814937	Significant
LIPF	OID30266	P07098	Cardiometabolic_II	Timepoint	11.0396	3.67988	3	91.8009	6.80631	0.000341047	0.00817123	Significant
LTBP2	OID20254	Q14767	Cardiometabolic	progression_status	5.22848	5.22848	1	62.8866	14.3441	0.000342865	0.0081762	Significant
PLAT	OID20247	P00750	Cardiometabolic	Timepoint	13.4419	4.48063	3	97.2841	6.76374	0.000343109	0.0081762	Significant
IL7R	OID21136	P16871	Neurology	Timepoint	3.39055	1.13018	3	91.3161	6.78195	0.000352387	0.00837465	Significant
MATN2	OID20767	O00339	Inflammation	Timepoint	4.80269	1.6009	3	94.9787	6.73491	0.00036142	0.00856624	Significant
PGF	OID20673	P49763	Inflammation	progression_status	2.00025	2.00025	1	53.781	14.4523	0.000368709	0.00871557	Significant
BCHE	OID30717	P06276	Inflammation_II	progression_status	1.74468	1.74468	1	56.1601	14.2922	0.000381141	0.00898534	Significant
CA4	OID20241	P22748	Cardiometabolic	Timepoint	1.96492	0.654974	3	92.8074	6.69795	0.000384151	0.00903215	Significant
IL6	OID21276	P05231	Oncology	Timepoint	20.8056	6.93519	3	93.9924	6.68632	0.000385771	0.00904612	Significant
CDH23	OID31074	Q9H251	Neurology_II	Timepoint	1.33912	0.446373	3	97.5599	6.65615	0.000389075	0.00909941	Significant
CLEC3B	OID30756	P05452	Inflammation_II	progression_status	1.61771	1.61771	1	60.6073	14.088	0.000393091	0.00916901	Significant
KLK4	OID21391	Q9Y5K2	Oncology	Timepoint	9.14832	3.04944	3	92.6903	6.67029	0.000397254	0.00924165	Significant
CD209	OID20262	Q9NNX6	Cardiometabolic	Timepoint	3.20124	1.06708	3	92.7674	6.66217	0.000400822	0.00930013	Significant
DSG3	OID21460	P32926	Oncology	Timepoint	4.60535	1.53512	3	94.8098	6.60398	0.000422544	0.00973166	Significant
PDIA4	OID30375	P13667	Cardiometabolic_II	Timepoint	8.56323	2.85441	3	96.8875	6.59002	0.000422991	0.00973166	Significant
CXCL10	OID20697	P02778	Inflammation	Timepoint	10.437	3.47899	3	94.5152	6.60487	0.000423048	0.00973166	Significant
CLSTN2	OID20664	Q9H4D0	Inflammation	progression_status	3.50605	3.50605	1	59.48	13.9439	0.000423836	0.00973166	Significant
CHAD	OID30660	O15335	Inflammation_II	Timepoint:progression_status	6.83413	2.27804	3	91.686	6.61324	0.000428333	0.00980937	Significant
BMP10	OID30575	O95393	Inflammation_II	Timepoint	3.24112	1.08037	3	97.8747	6.56329	0.000433576	0.00990372	Significant
CDH5	OID20243	P33151	Cardiometabolic	Timepoint	4.98437	1.66146	3	95.1929	6.56588	0.000440789	0.0100425	Significant
SLC9A3R2	OID31445	Q15599	Oncology_II	Timepoint	4.42188	1.47396	3	92.3069	6.58156	0.000442421	0.0100537	Significant
CTSC	OID20679	P53634	Inflammation	progression_status	3.59029	3.59029	1	60.8011	13.7937	0.00044538	0.0100949	Significant
BCAN	OID20998	Q96GW7	Neurology	Timepoint	5.22216	1.74072	3	96.5373	6.53228	0.000454224	0.0102689	Significant
CPXM2	OID30322	Q8N436	Cardiometabolic_II	Timepoint	2.32797	0.775989	3	94.9153	6.5322	0.00045971	0.0103664	Significant
SMPDL3A	OID20676	Q92484	Inflammation	Timepoint	4.77823	1.59274	3	93.1271	6.53956	0.000461944	0.0103902	Significant
CPVL	OID21435	Q9H3G5	Oncology	Timepoint	7.02949	2.34316	3	92.8006	6.53422	0.000466048	0.0104558	Significant
WIF1	OID21464	Q9Y5W5	Oncology	Timepoint	4.07258	1.35753	3	93.6527	6.51348	0.00047451	0.0106187	Significant
PTPRN2	OID20912	Q92932	Neurology	Timepoint	3.42324	1.14108	3	91.2068	6.50882	0.000486278	0.0108545	Significant
DAB2	OID21428	P98082	Oncology	Timepoint	6.77361	2.25787	3	93.0643	6.49147	0.000489226	0.0108927	Significant
SUMF2	OID21032	Q8NBJ7	Neurology	Timepoint	4.97367	1.65789	3	94.5353	6.47893	0.000491097	0.0109068	Significant
IL6	OID20911	P05231	Neurology	Timepoint	20.0216	6.67388	3	93.7469	6.46808	0.000500382	0.0110851	Significant
CRISP3	OID30715	P54108	Inflammation_II	Timepoint	0.798618	0.266206	3	91.8629	6.46574	0.000509018	0.0112482	Significant
MPHOSPH8	OID20092	Q99549	Cardiometabolic	Timepoint	13.6553	4.55178	3	94.2647	6.44211	0.00051406	0.0113312	Significant
ITGA11	OID20581	Q9UKX5	Inflammation	Timepoint	3.88454	1.29485	3	94.4846	6.42762	0.000522146	0.0114589	Significant
DNER	OID20712	Q8NFT8	Inflammation	Timepoint	3.08778	1.02926	3	92.9471	6.43672	0.000522454	0.0114589	Significant
CDH6	OID20157	P55285	Cardiometabolic	Timepoint	7.2889	2.42963	3	92.8739	6.43394	0.000524464	0.0114744	Significant
CST6	OID20293	Q15828	Cardiometabolic	Timepoint	3.96653	1.32218	3	92.8187	6.41041	0.000539513	0.0117745	Significant
IL6	OID20101	P05231	Cardiometabolic	progression_status	15.6032	15.6032	1	60.8046	13.3314	0.000544551	0.0118551	Significant
TNFRSF13C	OID20480	Q96RJ3	Inflammation	Timepoint	3.90537	1.30179	3	94.746	6.36832	0.000559236	0.0121448	Significant
MAP1LC3A	OID30868	Q9H492	Neurology_II	Timepoint	4.978	1.65933	3	105.276	6.30266	0.000565504	0.0122346	Significant
PRCP	OID20337	P42785	Cardiometabolic	Timepoint	3.10858	1.03619	3	93.4322	6.36596	0.000566145	0.0122346	Significant
LRP1	OID21293	Q07954	Oncology	Timepoint	3.67434	1.22478	3	97.303	6.31989	0.000582119	0.012549	Significant
ITGB6	OID20493	P18564	Inflammation	Timepoint	5.10909	1.70303	3	91.7184	6.345	0.000587798	0.0126239	Significant
UPB1	OID30352	Q9UBR1	Cardiometabolic_II	Timepoint:progression_status	26.8941	8.96472	3	97.7317	6.30845	0.000588458	0.0126239	Significant
CFHR4	OID30758	Q92496	Inflammation_II	Timepoint	1.70125	0.567082	3	91.6192	6.31756	0.000607664	0.0130043	Significant
MSTN	OID20115	O14793	Cardiometabolic	progression_status	5.92466	5.92466	1	52.6996	13.2794	0.000613891	0.0131058	Significant
SEL1L	OID30196	Q9UBV2	Cardiometabolic_II	Timepoint	1.7439	0.581299	3	93.2138	6.29069	0.000620075	0.0132058	Significant
ICAM1	OID20411	P05362	Cardiometabolic	Timepoint	3.8399	1.27997	3	93.976	6.2752	0.000628201	0.0133466	Significant
SELENOP	OID30745	P49908	Inflammation_II	Timepoint	3.18584	1.06195	3	103.85	6.21925	0.000630805	0.0133697	Significant
PON3	OID20777	Q15166	Inflammation	Timepoint	3.94202	1.31401	3	94.3452	6.25771	0.000639773	0.0135273	Significant
EPHA2	OID21342	P29317	Oncology	Timepoint	4.0318	1.34393	3	89.7472	6.28241	0.000642475	0.0135519	Significant
CLEC12A	OID30552	Q5QGZ9	Inflammation_II	Timepoint	1.55731	0.519102	3	92.8132	6.26014	0.000644857	0.0135697	Significant
HIP1R	OID31141	O75146	Neurology_II	Timepoint	22.5092	7.50308	3	93.7369	6.24756	0.000650308	0.0136518	Significant
ENG	OID20287	P17813	Cardiometabolic	Timepoint	2.11952	0.706507	3	96.2612	6.22724	0.000654891	0.0137154	Significant
CTHRC1	OID30393	Q96CG8	Cardiometabolic_II	progression_status	2.76695	2.76695	1	60.8052	12.8899	0.000660846	0.0138073	Significant
CTSF	OID21500	Q9UBX1	Oncology	Timepoint	5.25756	1.75252	3	94.5463	6.22551	0.000663887	0.013838	Significant
LAMP3	OID20638	Q9UQV4	Inflammation	Timepoint	5.17615	1.72538	3	91.4289	6.22609	0.0006782	0.0140555	Significant
CD93	OID20397	Q9NPY3	Cardiometabolic	Timepoint	3.63277	1.21092	3	94.472	6.20778	0.000678423	0.0140555	Significant
VIT	OID30334	Q6UXI7	Cardiometabolic_II	Timepoint	3.83532	1.27844	3	93.316	6.21247	0.00068005	0.0140555	Significant
FDX1	OID30078	P10109	Cardiometabolic_II	Timepoint	5.47217	1.82406	3	95.4124	6.19875	0.000681434	0.0140555	Significant
TRIM21	OID20533	P19474	Inflammation	Timepoint	7.65723	2.55241	3	93.1951	6.21042	0.000682288	0.0140555	Significant
CCL28	OID20569	Q9NRJ3	Inflammation	Timepoint	3.22707	1.07569	3	95.694	6.19122	0.000686301	0.0141052	Significant
PLA2G4A	OID20685	P47712	Inflammation	Timepoint	5.62294	1.87431	3	94.69	6.1949	0.000687907	0.0141053	Significant
KLK1	OID21499	P06870	Oncology	Timepoint	5.44002	1.81334	3	91.7538	6.20469	0.000694013	0.0141897	Significant
MCFD2	OID20171	Q8NI22	Cardiometabolic	Timepoint	4.13135	1.37712	3	94.4978	6.18711	0.000695244	0.0141897	Significant
SERPINA3	OID30786	P01011	Inflammation_II	Timepoint	1.20937	0.403124	3	95.7762	6.1668	0.000706262	0.0143813	Significant
SCARF2	OID21048	Q96GP6	Neurology	Timepoint	5.10564	1.70188	3	95.0543	6.16725	0.00070927	0.0144093	Significant
HAVCR2	OID21137	Q8TDQ0	Neurology	Timepoint	4.00436	1.33479	3	92.5833	6.17222	0.00071709	0.0145347	Significant
IL6	OID21276	P05231	Oncology	progression_status	13.2114	13.2114	1	58.9381	12.7373	0.000720356	0.0145674	Significant
ERBB2	OID21520	P04626	Oncology	Timepoint	2.01555	0.671849	3	93.2007	6.16127	0.00072339	0.0145711	Significant
CLEC11A	OID21112	Q9Y240	Neurology	Timepoint	6.2357	2.07857	3	92.9124	6.16209	0.000724128	0.0145711	Significant
BDNF	OID30373	P23560	Cardiometabolic_II	Timepoint	19.1027	6.36755	3	95.6615	6.14498	0.000725499	0.0145711	Significant
LTBR	OID20768	P36941	Inflammation	Timepoint	3.17403	1.05801	3	93.4421	6.14665	0.000734887	0.0147261	Significant
GSTT2B	OID31097	P0CG30	Neurology_II	Timepoint	12.8846	4.29487	3	91.6504	6.14849	0.00074248	0.0148445	Significant
NAGK	OID30271	Q9UJ70	Cardiometabolic_II	Timepoint	11.0588	3.68625	3	95.3679	6.11165	0.000756478	0.0150902	Significant
GPHA2	OID31437	Q96T91	Oncology_II	Timepoint	0.454003	0.151334	3	93.2758	6.1005	0.000777352	0.0154716	Significant
HMBS	OID21385	P08397	Oncology	Timepoint	7.10738	2.36913	3	94.0367	6.09247	0.000780847	0.0155061	Significant
MME	OID21307	P08473	Oncology	Timepoint:progression_status	11.6013	3.86709	3	91.7417	6.09636	0.000789459	0.0156419	Significant
BPIFA2	OID30279	Q96DR5	Cardiometabolic_II	Timepoint	10.8342	3.6114	3	91.2509	6.08281	0.000805032	0.0159025	Significant
DKKL1	OID21313	Q9UK85	Oncology	Timepoint	3.95897	1.31966	3	91.1866	6.08195	0.000806219	0.0159025	Significant
TGFBR2	OID21493	P37173	Oncology	Timepoint	2.00619	0.668731	3	92.2487	6.06417	0.000817452	0.0160828	Significant
DPEP2	OID21305	Q9H4A9	Oncology	Timepoint	6.06318	2.02106	3	100.87	6.0177	0.000819009	0.0160828	Significant
CD2AP	OID20177	Q9Y5K6	Cardiometabolic	Timepoint	7.72557	2.57519	3	95.569	6.03855	0.000824655	0.0161577	Significant
PLXNA4	OID20597	Q9HCM2	Inflammation	Timepoint	4.99215	1.66405	3	101.779	6.00419	0.000828224	0.0161917	Significant
RBM17	OID31034	Q96I25	Neurology_II	progression_status	5.60748	5.60748	1	70.2839	12.1932	0.000833459	0.0162196	Significant
PSMG3	OID20549	Q9BT73	Inflammation	Timepoint	9.16582	3.05527	3	96.8947	6.02251	0.000833737	0.0162196	Significant
BGLAP	OID30389	P02818	Cardiometabolic_II	progression_status	10.6789	10.6789	1	60.7173	12.3624	0.000835171	0.0162196	Significant
LIF	OID20824	P15018	Neurology	Timepoint	19.155	6.38501	3	93.7696	6.03103	0.000841829	0.016313	Significant
C7	OID30766	P10643	Inflammation_II	Timepoint	2.78066	0.926886	3	94.0387	6.00593	0.000865967	0.0167439	Significant
IL10RB	OID20696	Q08334	Inflammation	Timepoint	2.77826	0.926087	3	93.354	6.00641	0.000869342	0.0167724	Significant
IL15	OID20562	P40933	Inflammation	progression_status	1.93117	1.93117	1	60.7906	12.2486	0.000877934	0.0169012	Significant
C7orf50	OID31095	Q9BRJ6	Neurology_II	progression_status	1.06765	1.06765	1	67.5304	12.1101	0.000883169	0.0169649	Significant
ADAMTS13	OID20249	Q76LX8	Cardiometabolic	progression_status	1.35022	1.35022	1	53.4669	12.3999	0.000887017	0.0170018	Significant
CCER2	OID30221	I3L3R5	Cardiometabolic_II	Timepoint	2.18006	0.726686	3	91.6069	5.99243	0.000894301	0.0171042	Significant
RARRES1	OID21177	P49788	Oncology	Timepoint	2.29475	0.764916	3	94.4889	5.94563	0.000928168	0.0177135	Significant
SAFB2	OID31012	Q14151	Neurology_II	Timepoint	2.92704	0.975681	3	95.5475	5.92924	0.000940403	0.0178511	Significant
DPY30	OID21410	Q9C005	Oncology	Timepoint	26.8633	8.95444	3	92.5918	5.94388	0.000941486	0.0178511	Significant
FCRLB	OID21193	Q6BAA4	Oncology	Timepoint	25.6967	8.56555	3	94.1207	5.93455	0.000942769	0.0178511	Significant
F11R	OID21151	Q9Y624	Neurology	Timepoint	4.99641	1.66547	3	94.1417	5.93382	0.000943472	0.0178511	Significant
CD7	OID30543	P09564	Inflammation_II	Timepoint	3.72898	1.24299	3	94.1467	5.92406	0.000954543	0.0180219	Significant
CA6	OID21096	P23280	Neurology	Timepoint	5.11417	1.70472	3	91.4457	5.92775	0.000967066	0.0182193	Significant
LAMA4	OID20769	Q16363	Inflammation	Timepoint	3.42453	1.14151	3	94.2186	5.90943	0.000970998	0.0182544	Significant
SDK2	OID30662	Q58EX2	Inflammation_II	Timepoint	2.85911	0.953038	3	92.8827	5.89961	0.000990819	0.0185873	Significant
LEP	OID20187	P41159	Cardiometabolic	progression_status	6.71872	6.71872	1	54.1819	12.11	0.000998188	0.0186858	Significant
ADGRB3	OID20974	O60242	Neurology	Timepoint	1.72325	0.574417	3	94.3487	5.87075	0.00101631	0.0189847	Significant
IL22	OID31407	Q9GZX6	Oncology_II	Timepoint	8.89996	2.96665	3	93.0999	5.87338	0.00102102	0.0190324	Significant
ADAMTS4	OID30471	O75173	Inflammation_II	progression_status	3.07551	3.07551	1	67.2928	11.7728	0.00103157	0.0191717	Significant
IL6	OID20911	P05231	Neurology	progression_status	12.3133	12.3133	1	58.4188	11.9336	0.00103284	0.0191717	Significant
GAS6	OID20318	Q14393	Cardiometabolic	Timepoint	4.15951	1.3865	3	95.773	5.83422	0.00105282	0.0195016	Significant
STC1	OID21014	P52823	Neurology	Timepoint	13.4635	4.48784	3	92.5568	5.84757	0.0010567	0.0195323	Significant
ATP5IF1	OID20760	Q9UII2	Inflammation	Timepoint	16.9606	5.65352	3	95.6953	5.82863	0.00106043	0.0195408	Significant
VGF	OID31067	O15240	Neurology_II	Timepoint:progression_status	2.39932	0.799773	3	97.7484	5.81784	0.00106159	0.0195408	Significant
CREG1	OID21515	O75629	Oncology	Timepoint	4.07461	1.3582	3	95.8037	5.82098	0.00106955	0.0196464	Significant
RBPMS	OID30507	Q93062	Inflammation_II	progression_status	2.86155	2.86155	1	69.0463	11.6574	0.00107423	0.0196913	Significant
EIF4G3	OID31022	O43432	Neurology_II	Timepoint:progression_status	4.49147	1.49716	3	104.952	5.7726	0.00107959	0.0197485	Significant
NPTN	OID21235	Q9Y639	Oncology	Timepoint	6.46971	2.15657	3	93.0148	5.81406	0.00109683	0.0199715	Significant
IL6	OID20101	P05231	Cardiometabolic	Timepoint	20.381	6.79366	3	94.705	5.8045	0.00109813	0.0199715	Significant
VWA1	OID21421	Q6PCB0	Oncology	progression_status	5.3339	5.3339	1	65.6288	11.6616	0.00109858	0.0199715	Significant
LETM1	OID31018	O95202	Neurology_II	Timepoint	16.0294	5.34314	3	94.9436	5.79801	0.00110516	0.0200438	Significant
LRRC37A2	OID31440	A6NM11	Oncology_II	Timepoint	1.2175	0.405834	3	93.8526	5.80201	0.00110711	0.0200438	Significant
CDHR1	OID20808	Q96JP9	Neurology	Timepoint	3.52749	1.17583	3	95.8657	5.78792	0.00111262	0.0201023	Significant
OXCT1	OID30227	P55809	Cardiometabolic_II	progression_status	7.22306	7.22306	1	62.0311	11.6847	0.0011183	0.0201307	Significant
EPHA4	OID30622	P54764	Inflammation_II	Timepoint	3.61588	1.20529	3	94.5527	5.78979	0.00111875	0.0201307	Significant
LEG1	OID30608	Q6P5S2	Inflammation_II	Timepoint	4.24704	1.41568	3	92.0144	5.80075	0.00112146	0.0201384	Significant
DHODH	OID30137	Q02127	Cardiometabolic_II	Timepoint:progression_status	3.39079	1.13026	3	95.6916	5.77599	0.00112987	0.020248	Significant
IL6	OID20563	P05231	Inflammation	progression_status	19.9123	19.9123	1	64.2852	11.5775	0.00115312	0.0206228	Significant
IL32	OID20605	P24001	Inflammation	Timepoint	8.36229	2.78743	3	93.2748	5.76017	0.00116825	0.0208061	Significant
SUOX	OID31031	P51687	Neurology_II	Timepoint	17.2861	5.76202	3	98.0557	5.7368	0.00116888	0.0208061	Significant
CLEC7A	OID20636	Q9BXN2	Inflammation	Timepoint	2.45175	0.817251	3	91.8221	5.76606	0.00117045	0.0208061	Significant
ENDOU	OID31498	P21128	Oncology_II	Timepoint	2.50716	0.835721	3	92.5785	5.75917	0.00117463	0.0208384	Significant
ITIH3	OID20352	Q06033	Cardiometabolic	progression_status	4.70996	4.70996	1	75.4733	11.3556	0.00118771	0.0209999	Significant
CD55	OID20377	P08174	Cardiometabolic	Timepoint	1.70499	0.56833	3	92.7666	5.74739	0.00118998	0.0209999	Significant
CFB	OID30755	P00751	Inflammation_II	Timepoint	7.07354	2.35785	3	96.8987	5.72557	0.0011925	0.0209999	Significant
DPP10	OID20527	Q8N608	Inflammation	Timepoint	6.95964	2.31988	3	91.1433	5.7535	0.00119326	0.0209999	Significant
ENPP6	OID30273	Q6UWR7	Cardiometabolic_II	Timepoint	1.67848	0.559494	3	92.0551	5.74441	0.00119947	0.0210672	Significant
BCAT1	OID30312	P54687	Cardiometabolic_II	Timepoint	3.0709	1.02363	3	93.3547	5.73304	0.00120635	0.021146	Significant
GIGYF2	OID31062	Q6Y7W6	Neurology_II	Timepoint	10.0647	3.3549	3	92.2945	5.71827	0.00123584	0.0216198	Significant
SLITRK2	OID21409	Q9H156	Oncology	Timepoint	7.00411	2.3347	3	93.7678	5.70586	0.00124337	0.0217085	Significant
PDGFB	OID20741	P01127	Inflammation	Timepoint	18.2913	6.09712	3	94.9698	5.694	0.00125245	0.0218239	Significant
UPK3A	OID30794	O75631	Neurology_II	progression_status	44.3642	44.3642	1	132	10.8463	0.00127073	0.0220808	Significant
FGFBP1	OID21507	Q14512	Oncology	Timepoint	4.05668	1.35223	3	93.6031	5.68761	0.00127221	0.0220808	Significant
ARSA	OID21138	P15289	Neurology	Timepoint	2.92562	0.975207	3	90.9007	5.69186	0.00128657	0.0222774	Significant
PM20D1	OID20149	Q6GTS8	Cardiometabolic	Timepoint	11.8801	3.96003	3	90.3823	5.69326	0.00128859	0.0222774	Significant
F13B	OID30781	P05160	Inflammation_II	Timepoint	1.9389	0.646299	3	91.9608	5.68324	0.00129151	0.0222842	Significant
METAP1D	OID20519	Q6UB28	Inflammation	Timepoint:progression_status	27.4701	9.1567	3	95.9449	5.65933	0.00129879	0.022366	Significant
ITGA2	OID30570	P17301	Inflammation_II	progression_status	1.7354	1.7354	1	57.9676	11.425	0.00130181	0.0223743	Significant
CD300LG	OID21130	Q6UXG3	Neurology	Timepoint	2.04133	0.680445	3	92.9551	5.66254	0.00131617	0.0225771	Significant
AMY2A	OID20333	P04746	Cardiometabolic	Timepoint	6.28779	2.09593	3	93.4477	5.65562	0.00132333	0.0226559	Significant
ENPP5	OID20736	Q9UJA9	Inflammation	Timepoint	1.97318	0.657725	3	93.7019	5.65183	0.00132742	0.0226733	Significant
TNFRSF10C	OID20265	O14798	Cardiometabolic	Timepoint	1.89918	0.633062	3	93.0751	5.65358	0.00132949	0.0226733	Significant
CXCL16	OID20282	Q9H2A7	Cardiometabolic	Timepoint	2.17467	0.724891	3	93.2789	5.62403	0.00137596	0.023389	Significant
HEXIM1	OID20589	O94992	Inflammation	Timepoint	12.4971	4.16571	3	95.3201	5.61395	0.00137676	0.023389	Significant
CKAP4	OID20617	Q07065	Inflammation	Timepoint	5.54305	1.84768	3	91.9065	5.60231	0.00142377	0.0241412	Significant
WWP2	OID20926	O00308	Neurology	Timepoint	6.45949	2.15316	3	95.0861	5.57784	0.00144002	0.0243698	Significant
GRPEL1	OID21309	Q9HAV7	Oncology	Timepoint	32.923	10.9743	3	93.7581	5.57721	0.00145184	0.0245227	Significant
CTSH	OID20113	P09668	Cardiometabolic	Timepoint	4.0837	1.36123	3	94.2531	5.56406	0.00147096	0.0247931	Significant
FUS	OID21256	P35637	Oncology	Timepoint	7.08968	2.36323	3	94.8247	5.55803	0.00147702	0.0247931	Significant
GPC5	OID20944	P78333	Neurology	Timepoint	3.6999	1.2333	3	93.944	5.56092	0.00147909	0.0247931	Significant
PSG1	OID20916	P11464	Neurology	progression_status	4.04681	4.04681	1	52.0525	11.2684	0.0014791	0.0247931	Significant
ITGAL	OID30537	P20701	Inflammation_II	progression_status	8.74155	8.74155	1	69.4798	10.9461	0.00148839	0.0249016	Significant
OXT	OID21047	P01178	Neurology	Timepoint	10.7222	3.57407	3	92.1835	5.55961	0.00149635	0.0249874	Significant
GDF2	OID20202	Q9UK05	Cardiometabolic	Timepoint	11.6202	3.8734	3	94.9456	5.52627	0.00153381	0.0255566	Significant
LBP	OID20355	P18428	Cardiometabolic	Timepoint	11.2897	3.76324	3	96.5747	5.51778	0.00153624	0.0255566	Significant
IL3RA	OID20461	P26951	Inflammation	Timepoint	2.17413	0.72471	3	92.729	5.53289	0.00154044	0.0255586	Significant
RARRES1	OID21177	P49788	Oncology	Timepoint:progression_status	2.13192	0.710641	3	94.5074	5.52376	0.00154215	0.0255586	Significant
POLR2F	OID21283	P61218	Oncology	Timepoint	7.14513	2.38171	3	93.9331	5.52388	0.0015468	0.0255587	Significant
CDON	OID20754	Q4KMG0	Inflammation	Timepoint	4.76919	1.58973	3	96.5766	5.5115	0.00154796	0.0255587	Significant
TJAP1	OID21477	Q5JTD0	Oncology	progression_status	3.42415	3.42415	1	66.7242	10.8914	0.00155324	0.025598	Significant
ICAM5	OID20145	Q9UMF0	Cardiometabolic	Timepoint	3.38445	1.12815	3	92.5461	5.52499	0.00155681	0.0256089	Significant
ACRBP	OID31385	Q8NEB7	Oncology_II	Timepoint	1.32728	0.442426	3	101.583	5.4798	0.00156925	0.0257539	Significant
ACTA2	OID20079	P62736	Cardiometabolic	progression_status	3.75705	3.75705	1	55.7244	11.0511	0.00157146	0.0257539	Significant
PNLIP	OID30693	P16233	Inflammation_II	Timepoint	13.1337	4.37789	3	95.9302	5.48364	0.00160657	0.0262804	Significant
GGT5	OID20909	P36269	Neurology	Timepoint	1.89447	0.631489	3	95.0588	5.47596	0.00162908	0.0265993	Significant
CTSS	OID21056	P25774	Neurology	Timepoint	1.07603	0.358676	3	92.1998	5.48629	0.0016343	0.0266351	Significant
SLC9A3R1	OID30630	O14745	Inflammation_II	Timepoint:progression_status	7.23274	2.41091	3	97.337	5.44447	0.00167262	0.0272095	Significant
THOP1	OID20194	P52888	Cardiometabolic	Timepoint	6.25117	2.08372	3	93.9639	5.43401	0.00172394	0.027962	Significant
IL6	OID20911	P05231	Neurology	Timepoint:progression_status	16.8215	5.60718	3	93.7668	5.43427	0.00172523	0.027962	Significant
JAM2	OID21064	P57087	Neurology	Timepoint	1.81866	0.606219	3	92.7419	5.43393	0.00173557	0.028078	Significant
MAP2	OID31138	P11137	Neurology_II	Timepoint	0.532751	0.177584	3	93.5489	5.42029	0.00175669	0.0283561	Significant
OXCT1	OID30227	P55809	Cardiometabolic_II	Timepoint	10.0393	3.34645	3	94.8269	5.41351	0.00175919	0.0283561	Significant
FNTA	OID31381	P49354	Oncology_II	Timepoint	3.02813	1.00938	3	97.596	5.39483	0.00177441	0.0285492	Significant
SERPINA5	OID30763	P05154	Inflammation_II	Timepoint	3.0962	1.03207	3	93.5554	5.40799	0.00178294	0.0286343	Significant
ALCAM	OID20273	Q13740	Cardiometabolic	Timepoint	2.33686	0.778955	3	94.1702	5.39823	0.00179824	0.0288013	Significant
NGRN	OID31115	Q9NPE2	Neurology_II	Timepoint:progression_status	1.34151	0.44717	3	95.8992	5.39009	0.00179988	0.0288013	Significant
FCGR3B	OID20387	O75015	Cardiometabolic	Timepoint	2.95206	0.984021	3	92.7536	5.38991	0.0018302	0.0292157	Significant
ADD1	OID30655	P35611	Inflammation_II	Timepoint	10.7248	3.57493	3	97.85	5.36739	0.0018324	0.0292157	Significant
ANGPTL2	OID20726	Q9UKU9	Inflammation	Timepoint	4.1198	1.37327	3	95.437	5.37501	0.00183746	0.0292422	Significant
CA12	OID21344	O43570	Oncology	Timepoint	4.00049	1.3335	3	93.1403	5.38346	0.0018407	0.0292422	Significant
CCL20	OID20671	P78556	Inflammation	Timepoint	18.3625	6.12083	3	95.3423	5.37094	0.00184744	0.0292966	Significant
VEGFA	OID20650	P15692	Inflammation	progression_status	2.24027	2.24027	1	57.0147	10.6512	0.00186177	0.0294708	Significant
AMOTL2	OID31351	Q9Y2J4	Oncology_II	progression_status	0.438218	0.438218	1	61.9092	10.5396	0.00188782	0.0298295	Significant
RALY	OID31382	Q9UKM9	Oncology_II	Timepoint	11.1545	3.71816	3	95.8514	5.34869	0.00189314	0.0298601	Significant
IL5RA	OID20601	Q01344	Inflammation	Timepoint	3.81205	1.27068	3	91.4519	5.36449	0.00190064	0.0299249	Significant
FCRL2	OID20639	Q96LA5	Inflammation	Timepoint	1.78909	0.596364	3	91.6034	5.35424	0.00192268	0.030218	Significant
ENPP2	OID20288	Q13822	Cardiometabolic	Timepoint	1.82763	0.609211	3	93.9085	5.33703	0.0019392	0.0304233	Significant
ACP6	OID21432	Q9NPH0	Oncology	Timepoint	5.29596	1.76532	3	93.1605	5.336	0.00194923	0.0305264	Significant
SPINK5	OID21148	Q9NQ38	Neurology	Timepoint	0.780026	0.260009	3	92.4497	5.33622	0.00195604	0.0305788	Significant
FKBP14	OID31065	Q9NWM8	Neurology_II	Timepoint	3.24324	1.08108	3	96.1429	5.3164	0.00196603	0.0306805	Significant
DCC	OID30953	P43146	Neurology_II	progression_status	1.14498	1.14498	1	67.5631	10.365	0.00197496	0.0307655	Significant
ADAM9	OID31488	Q13443	Oncology_II	Timepoint	3.668	1.22267	3	93.507	5.31647	0.00199223	0.0309797	Significant
DNM3	OID31000	Q9UQ16	Neurology_II	progression_status	1.63773	1.63773	1	63.8486	10.3907	0.00199637	0.0309895	Significant
MNAT1	OID31327	P51948	Oncology_II	progression_status	1.64067	1.64067	1	64.1755	10.3773	0.00200466	0.0310635	Significant
IGSF21	OID30210	Q96ID5	Cardiometabolic_II	Timepoint	3.34733	1.11578	3	92.5829	5.31341	0.0020093	0.0310807	Significant
AKR7L	OID30488	Q8NHP1	Inflammation_II	Timepoint:progression_status	8.11375	2.70458	3	101.048	5.26872	0.00203663	0.0314483	Significant
LY96	OID20945	Q9Y6Y9	Neurology	Timepoint	2.35757	0.785858	3	92.993	5.28254	0.00208133	0.0320824	Significant
CLTA	OID20118	P09496	Cardiometabolic	Timepoint	4.47462	1.49154	3	93.7206	5.27741	0.00208649	0.0321057	Significant
CD200R1	OID20595	Q8TD46	Inflammation	Timepoint	1.98627	0.662091	3	91.6744	5.27494	0.00211508	0.032489	Significant
ARAF	OID31260	P10398	Oncology_II	Timepoint	4.63916	1.54639	3	94.118	5.26153	0.00212281	0.032551	Significant
CXCL8	OID20153	P10145	Cardiometabolic	Timepoint	10.6282	3.54272	3	95.338	5.25069	0.00213797	0.0326981	Significant
GADD45GIP1	OID30237	Q8TAE8	Cardiometabolic_II	Timepoint:progression_status	2.51813	0.839377	3	94.6966	5.25257	0.00213982	0.0326981	Significant
PPCDC	OID21027	Q96CD2	Neurology	Timepoint	4.36295	1.45432	3	93.1964	5.25482	0.00215013	0.0327988	Significant
CLSTN1	OID20874	O94985	Neurology	Timepoint	10.9907	3.66356	3	96.3833	5.24034	0.00215416	0.0328035	Significant
SPTLC1	OID31086	O15269	Neurology_II	progression_status	1.16143	1.16143	1	64.1011	10.2125	0.00216569	0.0329222	Significant
GIPC2	OID31153	Q8TF65	Neurology_II	Timepoint	7.0041	2.3347	3	95.6354	5.23085	0.00218702	0.0331892	Significant
NECTIN4	OID21490	Q96NY8	Oncology	Timepoint	4.61413	1.53804	3	90.5561	5.24187	0.00221436	0.0335301	Significant
SIL1	OID30207	Q9H173	Cardiometabolic_II	Timepoint	1.38874	0.462914	3	96.6968	5.21549	0.00221709	0.0335301	Significant
YWHAQ	OID30605	P27348	Inflammation_II	Timepoint	4.6902	1.5634	3	95.194	5.21386	0.00223747	0.0337804	Significant
COL3A1	OID30379	P02461	Cardiometabolic_II	Timepoint	3.99384	1.33128	3	93.6786	5.214	0.00225376	0.0339682	Significant
VWC2L	OID31002	B2RUY7	Neurology_II	Timepoint	0.739725	0.246575	3	92.9671	5.21355	0.00226304	0.0340321	Significant
IGFBPL1	OID20155	Q8WX77	Cardiometabolic	Timepoint	2.9554	0.985134	3	94.259	5.20728	0.00226572	0.0340321	Significant
POF1B	OID30504	Q8WVV4	Inflammation_II	progression_status	3.40432	3.40432	1	65.4516	10.0802	0.00228534	0.0342304	Significant
AMY2B	OID20340	P19961	Cardiometabolic	Timepoint	6.41404	2.13801	3	93.9526	5.20015	0.00228888	0.0342304	Significant
RECK	OID30234	O95980	Cardiometabolic_II	Timepoint	0.707349	0.235783	3	98.4117	5.18231	0.00229057	0.0342304	Significant
STX6	OID21219	O43752	Oncology	Timepoint	13.5222	4.5074	3	94.5102	5.19522	0.00229633	0.0342585	Significant
AMY1A_AMY1B_AMY1C	OID30707	P0DUB6_P0DTE7_P0DTE8	Inflammation_II	progression_status	1.87414	1.87414	1	62.2276	10.0308	0.00238547	0.0355282	Significant
PILRA	OID21129	Q9UKJ1	Neurology	Timepoint	2.77741	0.925803	3	92.5038	5.16242	0.00241335	0.0358829	Significant
M6PR	OID30208	P20645	Cardiometabolic_II	Timepoint:progression_status	0.440505	0.146835	3	93.5867	5.15487	0.00242257	0.0359088	Significant
RAB33A	OID30122	Q14088	Cardiometabolic_II	Timepoint:progression_status	1.54487	0.514956	3	132	5.04677	0.00242325	0.0359088	Significant
BPIFB1	OID20308	Q8TDL5	Cardiometabolic	Timepoint:progression_status	4.74181	1.5806	3	92.3262	5.15668	0.00243236	0.0359521	Significant
ITPA	OID30082	Q9BY32	Cardiometabolic_II	Timepoint	4.66895	1.55632	3	95.2154	5.14326	0.00243794	0.0359521	Significant
PSAP	OID30419	P07602	Cardiometabolic_II	Timepoint	2.08962	0.696539	3	93.8166	5.14744	0.00244181	0.0359521	Significant
CCL13	OID20655	Q99616	Inflammation	Timepoint	5.0505	1.6835	3	93.9504	5.14669	0.00244248	0.0359521	Significant
TNFSF13	OID20733	O75888	Inflammation	Timepoint	2.96125	0.987082	3	93.689	5.14277	0.00245723	0.036109	Significant
ITGB5	OID21522	P18084	Oncology	Timepoint	2.15621	0.718738	3	94.5736	5.12656	0.00249555	0.0366111	Significant
FLT1	OID21301	P17948	Oncology	Timepoint	1.28657	0.428856	3	92.7964	5.11907	0.00253998	0.0371785	Significant
TFF1	OID21154	P04155	Neurology	Timepoint	10.6214	3.54048	3	93.1957	5.1166	0.00254266	0.0371785	Significant
PROK1	OID20543	P58294	Inflammation	Timepoint	3.89388	1.29796	3	94.6818	5.10857	0.00254949	0.0372166	Significant
CRYZL1	OID30272	O95825	Cardiometabolic_II	Timepoint	9.38952	3.12984	3	94.6424	5.10688	0.00255522	0.0372386	Significant
CEMIP2	OID30499	Q9UHN6	Inflammation_II	Timepoint	1.77634	0.592112	3	99.442	5.08745	0.00256105	0.037262	Significant
CLTA	OID20118	P09496	Cardiometabolic	progression_status	2.7998	2.7998	1	58.7952	9.90635	0.00258621	0.0375661	Significant
RRM2B	OID21174	Q7LG56	Oncology	Timepoint	26.2834	8.76115	3	105.898	5.04843	0.00261873	0.037976	Significant
COX6B1	OID30317	P14854	Cardiometabolic_II	Timepoint	1.30931	0.436435	3	99.6614	5.06698	0.00262372	0.0379858	Significant
DARS1	OID20903	P14868	Neurology	progression_status	5.44866	5.44866	1	64.5982	9.75796	0.0026727	0.0385855	Significant
GDF15	OID20251	Q99988	Cardiometabolic	Timepoint	5.91877	1.97292	3	92.507	5.0779	0.00267389	0.0385855	Significant
ADH4	OID20117	P08319	Cardiometabolic	progression_status	12.0779	12.0779	1	62.479	9.77991	0.00267849	0.0385886	Significant
KLRB1	OID20629	Q12918	Inflammation	Timepoint	1.85402	0.618007	3	91.5882	5.06841	0.00271699	0.0390794	Significant
PVR	OID21011	P15151	Neurology	Timepoint	4.79707	1.59902	3	95.6379	5.04709	0.00273584	0.0392864	Significant
NT5C	OID30294	Q8TCD5	Cardiometabolic_II	Timepoint	6.65396	2.21799	3	93.3243	5.05287	0.00274575	0.0392867	Significant
IL2RG	OID31361	P31785	Oncology_II	Timepoint	2.88249	0.96083	3	102.794	5.01897	0.00274814	0.0392867	Significant
CALCOCO2	OID30249	Q13137	Cardiometabolic_II	progression_status	3.04856	3.04856	1	64.2184	9.70273	0.00274922	0.0392867	Significant
NPHS1	OID30540	O60500	Inflammation_II	Timepoint	1.31848	0.439493	3	95.5816	5.04062	0.00275821	0.0393513	Significant
HGF	OID20656	P14210	Inflammation	progression_status	2.22161	2.22161	1	59.109	9.73549	0.00279416	0.0397998	Significant
PREB	OID20439	Q9HCU5	Inflammation	Timepoint	3.1813	1.06043	3	99.3228	5.01313	0.00280689	0.0399167	Significant
IL1RL1	OID20250	Q01638	Cardiometabolic	Timepoint	6.62643	2.20881	3	93.3079	5.03191	0.00281687	0.0399871	Significant
GFRA2	OID21330	O00451	Oncology	Timepoint	0.825091	0.27503	3	95.9217	5.02097	0.00282091	0.0399871	Significant
FAM13A	OID31463	O94988	Oncology_II	Timepoint	6.91815	2.30605	3	95.454	5.0167	0.00284156	0.040036	Significant
TSPAN8	OID31470	P19075	Oncology_II	Timepoint	9.37584	3.12528	3	92.5993	5.02732	0.00284209	0.040036	Significant
ENTPD2	OID21260	Q9Y5L3	Oncology	Timepoint	8.83206	2.94402	3	94.5734	5.01979	0.00284211	0.040036	Significant
KLK4	OID21391	Q9Y5K2	Oncology	Timepoint:progression_status	6.89427	2.29809	3	92.7018	5.02679	0.00284253	0.040036	Significant
PGLYRP1	OID20338	O75594	Cardiometabolic	Timepoint	2.73288	0.910961	3	92.781	5.02041	0.00286361	0.0402532	Significant
PDIA3	OID30573	P30101	Inflammation_II	Timepoint:progression_status	3.76575	1.25525	3	95.8457	5.00795	0.00286708	0.0402532	Significant
LRG1	OID30751	P02750	Inflammation_II	Timepoint	3.44818	1.14939	3	95.1497	5.0035	0.00289162	0.0404748	Significant
SLAMF7	OID20602	Q9NQ25	Inflammation	Timepoint	6.06984	2.02328	3	95.2037	5.00318	0.00289204	0.0404748	Significant
S100A14	OID30987	Q9HCY8	Neurology_II	Timepoint	3.75861	1.25287	3	92.6088	5.00259	0.00292869	0.0408998	Significant
GBP1	OID31128	P32455	Neurology_II	Timepoint	23.8944	7.9648	3	97.1634	4.9838	0.00293617	0.0408998	Significant
PIGR	OID21102	P01833	Neurology	Timepoint	4.48176	1.49392	3	92.8718	4.99944	0.00293632	0.0408998	Significant
ARAF	OID31260	P10398	Oncology_II	Timepoint:progression_status	4.40029	1.46676	3	94.1327	4.99061	0.0029509	0.041038	Significant
MUC16	OID21378	Q8WXI7	Oncology	progression_status	36.6892	36.6892	1	69.5951	9.48034	0.00297145	0.0412586	Significant
SELL	OID30752	P14151	Inflammation_II	progression_status	0.789884	0.789884	1	67.1404	9.5005	0.00297866	0.0412938	Significant
DPEP1	OID20897	P16444	Neurology	Timepoint	2.20893	0.736309	3	91.6991	4.98463	0.00300617	0.0416097	Significant
SYAP1	OID30636	Q96A49	Inflammation_II	Timepoint:progression_status	1.51483	0.504944	3	96.0438	4.96152	0.00303185	0.0418451	Significant
CD72	OID30641	P21854	Inflammation_II	Timepoint	3.4157	1.13857	3	91.9857	4.9753	0.00303635	0.0418451	Significant
PZP	OID30730	P20742	Inflammation_II	Timepoint	0.744631	0.24821	3	92.0683	4.97463	0.00303765	0.0418451	Significant
DOK2	OID20138	O60496	Cardiometabolic	Timepoint	2.70809	0.902696	3	99.6527	4.94649	0.00304216	0.0418451	Significant
DPP4	OID20406	P27487	Cardiometabolic	Timepoint	2.52756	0.842521	3	93.7446	4.96433	0.0030523	0.0418791	Significant
LRRN1	OID20438	Q6UXK5	Inflammation	progression_status	2.15203	2.15203	1	56.6034	9.58132	0.00305413	0.0418791	Significant
VEGFD	OID20662	O43915	Inflammation	Timepoint	5.60038	1.86679	3	96.6398	4.94935	0.00306949	0.0420243	Significant
MESD	OID21099	Q14696	Neurology	Timepoint	3.16699	1.05566	3	95.4025	4.95052	0.00308144	0.0421226	Significant
PNMA2	OID30842	Q9UL42	Neurology_II	Timepoint:progression_status	2.91448	0.971493	3	132	4.8538	0.00309549	0.0422491	Significant
MRPL28	OID31023	Q13084	Neurology_II	Timepoint	1.13961	0.379871	3	94.2228	4.9442	0.00312148	0.042538	Significant
LETM1	OID31018	O95202	Neurology_II	progression_status	8.69545	8.69545	1	62.8771	9.43572	0.00314285	0.0426547	Significant
ST6GAL1	OID20302	P15907	Cardiometabolic	Timepoint	7.01561	2.33854	3	98.4493	4.92284	0.00314708	0.0426547	Significant
IL17D	OID20481	Q8TAD2	Inflammation	Timepoint:progression_status	3.33876	1.11292	3	94.5824	4.93573	0.0031489	0.0426547	Significant
ADAMTS1	OID30528	Q9UHI8	Inflammation_II	Timepoint	2.9814	0.9938	3	96.6438	4.92834	0.00314939	0.0426547	Significant
S100A16	OID20878	Q96FQ6	Neurology	Timepoint	23.2164	7.73879	3	94.9574	4.9288	0.00317044	0.0428542	Significant
AGER	OID20756	Q15109	Inflammation	Timepoint:progression_status	3.05089	1.01696	3	93.6402	4.93041	0.00318266	0.0428542	Significant
PTPRR	OID31099	Q15256	Neurology_II	Timepoint	1.46848	0.489495	3	93.7069	4.93014	0.00318276	0.0428542	Significant
DPT	OID20278	Q07507	Cardiometabolic	progression_status	1.69351	1.69351	1	50.4634	9.59546	0.00318357	0.0428542	Significant
MYO6	OID30989	Q9UM54	Neurology_II	Timepoint	1.87191	0.62397	3	103.475	4.89304	0.00320194	0.0430358	Significant
CTSB	OID20276	P07858	Cardiometabolic	Timepoint	6.42417	2.14139	3	95.471	4.91084	0.00323362	0.0433954	Significant
CXCL8	OID20631	P10145	Inflammation	Timepoint	9.81371	3.27124	3	95.2346	4.89963	0.00328156	0.0439719	Significant
KITLG	OID20196	P21583	Cardiometabolic	Timepoint	3.33459	1.11153	3	93.539	4.90374	0.00328934	0.0440092	Significant
SPTBN2	OID30876	O15020	Neurology_II	Timepoint:progression_status	4.54875	1.51625	3	106.771	4.8606	0.00329446	0.044011	Significant
BPIFB2	OID30311	Q8N4F0	Cardiometabolic_II	Timepoint	7.34857	2.44952	3	93.3791	4.89123	0.00334226	0.044582	Significant
PNLIPRP1	OID31122	P54315	Neurology_II	Timepoint	13.9098	4.63662	3	98.1545	4.85943	0.00340591	0.0453624	Significant
CLEC3B	OID30756	P05452	Inflammation_II	Timepoint	1.67572	0.558574	3	94.6428	4.8644	0.00343464	0.0456761	Significant
INSL3	OID31129	P51460	Neurology_II	Timepoint:progression_status	9.50469	3.16823	3	90.7943	4.87421	0.00345233	0.0458421	Significant
CLEC4D	OID20609	Q8WXI8	Inflammation	Timepoint	3.37449	1.12483	3	91.8455	4.86377	0.0034797	0.0461361	Significant
CHCHD6	OID31426	Q9BRQ6	Oncology_II	progression_status	2.58956	2.58956	1	64.3346	9.19673	0.00349301	0.046243	Significant
LRP11	OID20185	Q86VZ4	Cardiometabolic	Timepoint	4.20908	1.40303	3	93.1307	4.85372	0.00350253	0.0462996	Significant
CRH	OID21257	P06850	Oncology	Timepoint:progression_status	18.6365	6.21215	3	94.0398	4.84924	0.00350788	0.0463009	Significant
IDO1	OID31474	P14902	Oncology_II	Timepoint	11.305	3.76834	3	97.6917	4.83319	0.00352392	0.0464431	Significant
BOC	OID20116	Q9BWV1	Cardiometabolic	Timepoint	2.39103	0.797011	3	96.5453	4.83346	0.00353904	0.0465727	Significant
CCL19	OID21030	Q99731	Neurology	progression_status	4.46738	4.46738	1	50.2383	9.36269	0.00354826	0.0466244	Significant
PLAU	OID21124	P00749	Neurology	Timepoint	3.95369	1.3179	3	93.2003	4.84161	0.00355359	0.046625	Significant
KRT14	OID20800	P02533	Neurology	Timepoint	27.1651	9.05503	3	99.8655	4.81495	0.00357357	0.0468052	Significant
CHCHD6	OID31426	Q9BRQ6	Oncology_II	Timepoint:progression_status	4.07672	1.35891	3	96.0776	4.8261	0.00357794	0.0468052	Significant
PCDH12	OID31045	Q9NPG4	Neurology_II	Timepoint	1.5932	0.531066	3	95.2885	4.82742	0.00358378	0.0468122	Significant
JPT2	OID31520	Q9H910	Oncology_II	Timepoint	8.93922	2.97974	3	95.3362	4.8234	0.00360077	0.0469398	Significant
SIRPB1	OID20739	O00241	Inflammation	Timepoint	4.79832	1.59944	3	93.3945	4.82876	0.00360673	0.0469398	Significant
CALCA	OID20983	P01258	Neurology	progression_status	7.25985	7.25985	1	56.4759	9.22515	0.00360952	0.0469398	Significant
MUC13	OID20866	Q9H3R2	Neurology	progression_status	10.6648	10.6648	1	50.7712	9.31119	0.00361718	0.04697	Significant
EDN1	OID30224	P05305	Cardiometabolic_II	Timepoint	3.06022	1.02007	3	94.8526	4.81236	0.00365707	0.0473976	Significant
SLAMF6	OID21254	Q96DU3	Oncology	Timepoint	8.07583	2.69194	3	95.4876	4.80937	0.00366086	0.0473976	Significant
CXCL9	OID20675	Q07325	Inflammation	Timepoint	9.95454	3.31818	3	94.7469	4.8096	0.00367107	0.0474209	Significant
FCGR3B	OID20387	O75015	Cardiometabolic	progression_status	1.6825	1.6825	1	54.4042	9.2158	0.0036773	0.0474209	Significant
TOP1	OID31449	P11387	Oncology_II	Timepoint	3.54572	1.18191	3	90.5569	4.82283	0.00367879	0.0474209	Significant
HLA-DRA	OID20520	P01903	Inflammation	Timepoint	5.45294	1.81765	3	94.4743	4.80479	0.0036969	0.0475255	Significant
HGFAC	OID30718	Q04756	Inflammation_II	Timepoint	2.06738	0.689126	3	95.7228	4.79947	0.00370196	0.0475255	Significant
IL6	OID20563	P05231	Inflammation	Timepoint	24.7488	8.24959	3	96.2223	4.79649	0.00370797	0.0475255	Significant
CXCL8	OID21430	P10145	Oncology	Timepoint	10.0121	3.33738	3	95.2928	4.79947	0.00370847	0.0475255	Significant
CALCOCO2	OID30249	Q13137	Cardiometabolic_II	Timepoint	4.52003	1.50668	3	95.4875	4.79533	0.00372434	0.0476597	Significant
AKT1S1	OID20895	Q96B36	Neurology	Timepoint	15.6973	5.23243	3	99.1165	4.78221	0.00373116	0.0476777	Significant
CALCA	OID20983	P01258	Neurology	Timepoint	11.327	3.77566	3	93.3281	4.79777	0.00374686	0.0478091	Significant
CXCL8	OID20997	P10145	Neurology	Timepoint	10.7221	3.57405	3	95.7792	4.77986	0.00379112	0.0483039	Significant
TP53I3	OID30632	Q53FA7	Inflammation_II	Timepoint	6.82036	2.27345	3	94.5529	4.78132	0.00380334	0.0483897	Significant
ATG16L1	OID31466	Q676U5	Oncology_II	progression_status	3.40252	3.40252	1	62.7547	9.02909	0.00381544	0.0484737	Significant
ADAMTS13	OID20249	Q76LX8	Cardiometabolic	Timepoint	1.56164	0.520548	3	92.1119	4.78052	0.00384664	0.0487998	Significant
DEFB103A_DEFB103B	OID30534	P81534	Inflammation_II	Timepoint	3.73326	1.24442	3	103.357	4.7435	0.0038541	0.0488241	Significant
SPAG1	OID30979	Q07617	Neurology_II	Timepoint	2.31796	0.772654	3	93.8476	4.77094	0.00386325	0.0488504	Significant
PILRB	OID20197	Q9UKJ0	Cardiometabolic	Timepoint	2.98595	0.995316	3	91.6311	4.77785	0.00386725	0.0488504	Significant
IL1A	OID20488	P01583	Inflammation	progression_status	4.83395	4.83395	1	132	8.635	0.00389344	0.0491108	Significant
SCARF1	OID20297	Q14162	Cardiometabolic	Timepoint	1.86301	0.621005	3	94.3622	4.76074	0.00390343	0.0491665	Significant
IL6	OID21276	P05231	Oncology	Timepoint:progression_status	14.8103	4.93678	3	94.0127	4.75962	0.00391444	0.0492348	Significant
GNE	OID21231	Q9Y223	Oncology	Timepoint:progression_status	5.59437	1.86479	3	99.7171	4.73333	0.00395385	0.0496597	Significant
TPK1	OID30338	Q9H3S4	Cardiometabolic_II	Timepoint	2.51181	0.837271	3	94.9964	4.73938	0.00399656	0.0501247	Non-significant
ACE2	OID20105	Q9BYF1	Cardiometabolic	Timepoint	9.03664	3.01221	3	93.117	4.74413	0.00400418	0.0501489	Non-significant
TYRO3	OID20161	Q06418	Cardiometabolic	Timepoint	3.08765	1.02922	3	94.4282	4.72596	0.0040721	0.0509272	Non-significant
CALB2	OID20801	P22676	Neurology	Timepoint	9.72559	3.24186	3	97.3095	4.71263	0.00409262	0.0511113	Non-significant
WDR46	OID31389	O15213	Oncology_II	Timepoint:progression_status	2.70453	0.901511	3	94.5604	4.71517	0.00412406	0.0513777	Non-significant
FCRL5	OID21111	Q96RD9	Neurology	Timepoint	3.87134	1.29045	3	92.8908	4.71996	0.00412806	0.0513777	Non-significant
AGR2	OID20896	O95994	Neurology	progression_status	23.874	23.874	1	63.5094	8.85156	0.00413772	0.0513777	Non-significant
RHOC	OID20950	P08134	Neurology	Timepoint	4.74101	1.58034	3	93.2445	4.71605	0.00414177	0.0513777	Non-significant
NTRK3	OID21057	Q16288	Neurology	Timepoint	2.80655	0.935518	3	95.1852	4.70922	0.00414388	0.0513777	Non-significant
LGALS4	OID20748	P56470	Inflammation	Timepoint:progression_status	6.99669	2.33223	3	92.7283	4.7164	0.00414891	0.0513777	Non-significant
SIGLEC7	OID20190	Q9Y286	Cardiometabolic	Timepoint	2.46922	0.823072	3	92.9777	4.70909	0.0041818	0.0516109	Non-significant
TRIM21	OID20533	P19474	Inflammation	Timepoint:progression_status	5.80491	1.93497	3	93.2118	4.70809	0.00418285	0.0516109	Non-significant
CHCHD6	OID31426	Q9BRQ6	Oncology_II	Timepoint	3.96785	1.32262	3	96.0502	4.69722	0.0041911	0.0516109	Non-significant
AGXT	OID20139	P21549	Cardiometabolic	Timepoint:progression_status	14.9228	4.97427	3	95.0744	4.70033	0.00419115	0.0516109	Non-significant
IL18RAP	OID20900	O95256	Neurology	Timepoint	8.61678	2.87226	3	91.1947	4.70695	0.00422432	0.0519467	Non-significant
PDGFRB	OID20268	P09619	Cardiometabolic	Timepoint	1.53916	0.513052	3	92.9667	4.69789	0.0042396	0.0520621	Non-significant
CSF2RB	OID30553	P32927	Inflammation_II	Timepoint	2.72603	0.908676	3	92.776	4.69176	0.00427488	0.0524223	Non-significant
TTN	OID30108	Q8WZ42	Cardiometabolic_II	progression_status	1.45863	1.45863	1	65.4008	8.76153	0.00428161	0.0524319	Non-significant
SFRP4	OID30648	Q6FHJ7	Inflammation_II	Timepoint	4.86228	1.62076	3	94.9708	4.68101	0.00429336	0.0524954	Non-significant
NADK	OID20178	O95544	Cardiometabolic	Timepoint	12.4186	4.13953	3	95.1913	4.67929	0.0042987	0.0524954	Non-significant
EREG	OID20905	O14944	Neurology	progression_status	5.35137	5.35137	1	57.1269	8.81328	0.00436446	0.0532246	Non-significant
NOTCH1	OID20311	P46531	Cardiometabolic	Timepoint	2.11622	0.705406	3	97.225	4.65719	0.00438282	0.0533747	Non-significant
SEMA4C	OID21329	Q9C0C4	Oncology	Timepoint	5.27211	1.75737	3	95.9222	4.65496	0.00441652	0.0536302	Non-significant
P4HB	OID21509	P07237	Oncology	Timepoint	3.1784	1.05947	3	95.4319	4.65603	0.00441904	0.0536302	Non-significant
LGALS8	OID21041	O00214	Neurology	Timepoint	2.75505	0.91835	3	95.1673	4.65631	0.00442205	0.0536302	Non-significant
FUT1	OID31295	P19526	Oncology_II	Timepoint	4.90997	1.63666	3	94.9067	4.65086	0.0044562	0.0539702	Non-significant
RBFOX3	OID30984	A6NFN3	Neurology_II	Timepoint	8.96731	2.9891	3	92.9287	4.65484	0.00446949	0.0540569	Non-significant
FGF23	OID21411	Q9GZV9	Oncology	Timepoint	7.8439	2.61463	3	90.2168	4.66239	0.00447879	0.0540951	Non-significant
DNAJC21	OID31104	Q5F1R6	Neurology_II	Timepoint	1.92393	0.641309	3	98.0111	4.63199	0.00450783	0.0543714	Non-significant
GRIK2	OID30977	Q13002	Neurology_II	Timepoint	1.41445	0.471482	3	91.2822	4.64458	0.00455661	0.0548847	Non-significant
LARP1	OID31372	Q6PKG0	Oncology_II	Timepoint	5.85561	1.95187	3	92.8763	4.6305	0.00460554	0.0553985	Non-significant
CKAP4	OID20617	Q07065	Inflammation	progression_status	2.88512	2.88512	1	52.7307	8.74791	0.00463067	0.0556248	Non-significant
TOMM20	OID30353	Q15388	Cardiometabolic_II	Timepoint	4.14726	1.38242	3	93.2198	4.62379	0.00463717	0.0556272	Non-significant
PRSS53	OID31093	Q2L4Q9	Neurology_II	progression_status	0.518017	0.518017	1	48.4809	8.7964	0.00467345	0.0559861	Non-significant
CXCL5	OID20207	P42830	Cardiometabolic	Timepoint	14.3176	4.77253	3	94.1261	4.61281	0.00468326	0.0560275	Non-significant
CGN	OID30894	Q9P2M7	Neurology_II	Timepoint	10.825	3.60833	3	95.1631	4.59528	0.0047661	0.0569414	Non-significant
SERPINA12	OID20219	Q8IW75	Cardiometabolic	Timepoint:progression_status	2.96909	0.989697	3	90.0703	4.60305	0.0048177	0.0574298	Non-significant
EPS8L2	OID21397	Q9H6S3	Oncology	Timepoint:progression_status	7.58031	2.52677	3	94.6324	4.58776	0.00482001	0.0574298	Non-significant
NFU1	OID31510	Q9UMS0	Oncology_II	Timepoint	17.0188	5.67295	3	95.7908	4.57799	0.00485705	0.057793	Non-significant
SEPTIN8	OID31079	Q92599	Neurology_II	Timepoint	5.20975	1.73658	3	94.1963	4.58052	0.00487115	0.0578827	Non-significant
RBKS	OID20986	Q9H477	Neurology	Timepoint	13.7359	4.57864	3	98.3632	4.56699	0.00487778	0.0578834	Non-significant
MUC2	OID30377	Q02817	Cardiometabolic_II	Timepoint	7.11192	2.37064	3	91.6348	4.58522	0.00489214	0.0579758	Non-significant
CKMT1A_CKMT1B	OID20721	P12532	Inflammation	Timepoint	14.0553	4.68511	3	92.7764	4.57932	0.00490523	0.0580529	Non-significant
DNM3	OID31000	Q9UQ16	Neurology_II	Timepoint	2.15983	0.719944	3	95.0736	4.56772	0.00493188	0.0581407	Non-significant
EBI3_IL27	OID21389	Q14213_Q8NEV9	Oncology	Timepoint	2.20333	0.734443	3	94.2773	4.56924	0.0049375	0.0581407	Non-significant
BRK1	OID20883	Q8WUW1	Neurology	progression_status	4.01268	4.01268	1	54.9981	8.57999	0.00493852	0.0581407	Non-significant
GPI	OID30680	P06744	Inflammation_II	Timepoint	7.84538	2.61513	3	95.2381	4.56604	0.00493902	0.0581407	Non-significant
RETN	OID20327	Q9HD89	Cardiometabolic	Timepoint	2.05513	0.685044	3	91.2264	4.57717	0.00494868	0.0581766	Non-significant
CPXM1	OID21479	Q96SM3	Oncology	progression_status	1.2398	1.2398	1	58.4005	8.52981	0.00495854	0.0581999	Non-significant
IL1RL1	OID20250	Q01638	Cardiometabolic	progression_status	3.73992	3.73992	1	58.8476	8.51993	0.00496992	0.0581999	Non-significant
NUDT5	OID21115	Q9UKK9	Neurology	Timepoint	7.93562	2.64521	3	95.2534	4.55956	0.0049782	0.0581999	Non-significant
GPA33	OID21376	Q99795	Oncology	progression_status	10.4395	10.4395	1	68.7099	8.4176	0.00498864	0.0581999	Non-significant
CA9	OID21417	Q16790	Oncology	Timepoint:progression_status	8.54272	2.84757	3	95.2499	4.55771	0.00498964	0.0581999	Non-significant
NARS1	OID31035	O43776	Neurology_II	Timepoint:progression_status	3.21987	1.07329	3	98.0557	4.54938	0.00499026	0.0581999	Non-significant
BST1	OID21051	Q10588	Neurology	Timepoint	1.64277	0.547592	3	91.8057	4.56389	0.00501798	0.0584459	Non-significant
IL1RL2	OID20487	Q9HB29	Inflammation	Timepoint	2.74892	0.916305	3	93.3182	4.55499	0.00504301	0.0586383	Non-significant
RNASE4	OID30705	P34096	Inflammation_II	Timepoint	2.45214	0.817381	3	94.6312	4.55015	0.0050478	0.0586383	Non-significant
CD36	OID30485	P16671	Inflammation_II	progression_status	1.47137	1.47137	1	68.7971	8.3889	0.00505744	0.0586729	Non-significant
F11	OID30773	P03951	Inflammation_II	Timepoint	1.31476	0.438253	3	94.1836	4.54558	0.00508479	0.0589127	Non-significant
SNX9	OID20135	Q9Y5X1	Cardiometabolic	Timepoint	2.59517	0.865055	3	96.0706	4.53679	0.00510425	0.0589412	Non-significant
MMUT	OID30159	P22033	Cardiometabolic_II	Timepoint:progression_status	10.0024	3.33412	3	97.0873	4.53354	0.0051061	0.0589412	Non-significant
CLIP2	OID20559	Q9UDT6	Inflammation	Timepoint	10.7104	3.57012	3	100.353	4.52421	0.00510758	0.0589412	Non-significant
GIGYF2	OID31062	Q6Y7W6	Neurology_II	Timepoint:progression_status	8.00273	2.66758	3	92.3133	4.54677	0.00511398	0.0589412	Non-significant
SRPK2	OID20502	P78362	Inflammation	Timepoint	2.80164	0.93388	3	99.0607	4.52356	0.00513401	0.0590948	Non-significant
ACAN	OID20159	P16112	Cardiometabolic	Timepoint	1.85307	0.617689	3	94.1564	4.53549	0.00514868	0.0591863	Non-significant
LYSMD3	OID30950	Q7Z3D4	Neurology_II	Timepoint:progression_status	3.93297	1.31099	3	91.9713	4.52936	0.00523111	0.0600556	Non-significant
COX5B	OID21297	P10606	Oncology	Timepoint	13.2219	4.40729	3	92.9135	4.51908	0.00527812	0.0605165	Non-significant
S100A13	OID30529	Q99584	Inflammation_II	Timepoint	5.53324	1.84441	3	94.8082	4.50887	0.00530694	0.0607679	Non-significant
IDO1	OID30230	P14902	Cardiometabolic_II	Timepoint	9.11909	3.0397	3	97.3156	4.49479	0.00535164	0.0612002	Non-significant
TOMM20	OID30353	Q15388	Cardiometabolic_II	Timepoint:progression_status	4.03804	1.34601	3	93.2383	4.50203	0.00538304	0.0614796	Non-significant
DNAJC6	OID30247	O75061	Cardiometabolic_II	Timepoint	5.57606	1.85869	3	92.6232	4.50175	0.00539741	0.0615227	Non-significant
CA11	OID21195	O75493	Oncology	Timepoint	0.591237	0.197079	3	100.858	4.47779	0.00540077	0.0615227	Non-significant
OTUD7B	OID31064	Q6GQQ9	Neurology_II	Timepoint	3.90927	1.30309	3	94.7964	4.49193	0.00541879	0.0616484	Non-significant
USP28	OID31084	Q96RU2	Neurology_II	Timepoint	5.43095	1.81032	3	93.2878	4.49086	0.00545629	0.061995	Non-significant
FSHB	OID30233	P01225	Cardiometabolic_II	Timepoint	0.884711	0.294904	3	91.2292	4.49005	0.00550487	0.0624665	Non-significant
DCXR	OID21480	Q7Z4W1	Oncology	progression_status	8.50114	8.50114	1	65.4338	8.23961	0.00551549	0.0625065	Non-significant
PQBP1	OID21172	O60828	Oncology	progression_status	4.30658	4.30658	1	62.1918	8.26233	0.00553355	0.0626307	Non-significant
IL19	OID20158	Q9UHD0	Cardiometabolic	Timepoint	4.99665	1.66555	3	92.0788	4.48071	0.00554989	0.0627351	Non-significant
SERPINA4	OID30774	P29622	Inflammation_II	Timepoint	1.53216	0.510721	3	93.871	4.46927	0.00559071	0.0631156	Non-significant
DTNB	OID31395	O60941	Oncology_II	progression_status	2.4903	2.4903	1	55.5676	8.30686	0.005605	0.063196	Non-significant
ARHGEF5	OID30871	Q12774	Neurology_II	Timepoint	7.85672	2.61891	3	95.9714	4.44809	0.00569528	0.0640596	Non-significant
DHPS	OID31357	P49366	Oncology_II	Timepoint	4.20011	1.40004	3	95.2887	4.44974	0.00569739	0.0640596	Non-significant
GADD45B	OID31261	O75293	Oncology_II	Timepoint:progression_status	1.67265	0.557548	3	89.6584	4.46613	0.00570339	0.0640596	Non-significant
NRP2	OID21081	O60462	Neurology	Timepoint	5.52009	1.84003	3	96.2585	4.44411	0.00571758	0.0641372	Non-significant
PPY	OID21516	P01298	Oncology	Timepoint	9.48946	3.16315	3	93.3329	4.44891	0.00574358	0.064347	Non-significant
SCAMP3	OID21332	O14828	Oncology	Timepoint	5.6862	1.8954	3	93.2917	4.44662	0.00576059	0.0644557	Non-significant
ADAM12	OID30491	O43184	Inflammation_II	progression_status	3.71553	3.71553	1	56.2798	8.23149	0.00578757	0.0646353	Non-significant
CNTN3	OID21092	Q9P232	Neurology	Timepoint	1.93851	0.646171	3	91.7164	4.44708	0.0057913	0.0646353	Non-significant
TFF3	OID20371	Q07654	Cardiometabolic	Timepoint:progression_status	3.24404	1.08135	3	93.4152	4.43645	0.00583039	0.0649864	Non-significant
CGREF1	OID20152	Q99674	Cardiometabolic	Timepoint	1.95408	0.651359	3	91.1766	4.44151	0.00584298	0.0649864	Non-significant
DHRS4L2	OID31072	Q6PKH6	Neurology_II	Timepoint	1.87734	0.62578	3	105.534	4.4005	0.00586107	0.0649864	Non-significant
CR2	OID20393	P20023	Cardiometabolic	progression_status	1.54553	1.54553	1	53.0453	8.24138	0.00587056	0.0649864	Non-significant
TP53BP1	OID30470	Q12888	Inflammation_II	progression_status	1.82958	1.82958	1	59.7879	8.1633	0.00587254	0.0649864	Non-significant
CCL23	OID20693	P55773	Inflammation	Timepoint	3.94583	1.31528	3	95.492	4.42437	0.00587399	0.0649864	Non-significant
PNMA2	OID30842	Q9UL42	Neurology_II	Timepoint	2.61217	0.870724	3	132	4.35034	0.00587435	0.0649864	Non-significant
TG	OID31359	P01266	Oncology_II	progression_status	4.92095	4.92095	1	54.1448	8.21361	0.00590925	0.0652906	Non-significant
GIPC2	OID31153	Q8TF65	Neurology_II	Timepoint:progression_status	5.91478	1.97159	3	95.663	4.41732	0.00592166	0.0653458	Non-significant
EPGN	OID31373	Q6UW88	Oncology_II	progression_status	0.498921	0.498921	1	60.8401	8.12133	0.00596309	0.0657207	Non-significant
SDHB	OID31436	P21912	Oncology_II	Timepoint:progression_status	13.6935	4.56449	3	94.5559	4.41318	0.00597506	0.0657217	Non-significant
GSN	OID30714	P06396	Inflammation_II	Timepoint	2.59691	0.865636	3	95.7278	4.40944	0.00597809	0.0657217	Non-significant
AAMDC	OID30236	Q9H7C9	Cardiometabolic_II	Timepoint	0.83887	0.279623	3	95.3228	4.40562	0.00601472	0.0660421	Non-significant
EFEMP1	OID20414	Q12805	Cardiometabolic	Timepoint	3.72194	1.24065	3	94.4786	4.40117	0.00606561	0.0665181	Non-significant
BTD	OID30754	P43251	Inflammation_II	Timepoint	0.461753	0.153918	3	95.345	4.39532	0.00609105	0.0667141	Non-significant
MED21	OID30066	Q13503	Cardiometabolic_II	Timepoint	1.02357	0.341191	3	95.1707	4.39447	0.0061011	0.0667412	Non-significant
RWDD1	OID21015	Q9H446	Neurology	Timepoint	5.22697	1.74232	3	96.2774	4.38872	0.00612127	0.0668789	Non-significant
RCC1	OID31356	P18754	Oncology_II	Timepoint	5.64872	1.88291	3	93.1438	4.39469	0.00614328	0.0670362	Non-significant
ASGR1	OID20990	P07306	Neurology	progression_status	2.1382	2.1382	1	63.3055	8.02877	0.00616957	0.0672399	Non-significant
ADAMTSL4	OID30275	Q6UY14	Cardiometabolic_II	Timepoint	3.35941	1.1198	3	95.6243	4.38269	0.00618068	0.0672778	Non-significant
ACP1	OID30524	P24666	Inflammation_II	Timepoint	0.869791	0.28993	3	88.3407	4.403	0.00619264	0.0673249	Non-significant
CD300A	OID30576	Q9UGN4	Inflammation_II	Timepoint	1.58988	0.52996	3	92.0482	4.3877	0.0062209	0.0675012	Non-significant
AOC3	OID20389	Q16853	Cardiometabolic	Timepoint:progression_status	1.58549	0.528498	3	93.6623	4.38187	0.00622929	0.0675012	Non-significant
ITM2A	OID20504	O43736	Inflammation	Timepoint	19.0164	6.3388	3	101.493	4.36077	0.00623182	0.0675012	Non-significant
PPP1R9B	OID20643	Q96SB3	Inflammation	Timepoint	8.55554	2.85185	3	99.1556	4.36279	0.00626135	0.0676427	Non-significant
GOPC	OID20551	Q9HD26	Inflammation	Timepoint	10.3226	3.44085	3	96.6477	4.3689	0.00626503	0.0676427	Non-significant
PPBP	OID30761	P02775	Inflammation_II	Timepoint	11.1305	3.71017	3	94.919	4.37328	0.0062679	0.0676427	Non-significant
VWA1	OID21421	Q6PCB0	Oncology	Timepoint	5.98978	1.99659	3	96.7597	4.36519	0.00629145	0.0678139	Non-significant
AMY2A	OID20333	P04746	Cardiometabolic	progression_status	2.96496	2.96496	1	61.5178	8.00059	0.00630429	0.0678692	Non-significant
PCDHB15	OID31377	Q9Y5E8	Oncology_II	Timepoint	2.93075	0.976916	3	95.7462	4.36359	0.00632527	0.0680121	Non-significant
PSG1	OID20916	P11464	Neurology	Timepoint	4.70831	1.56944	3	92.0327	4.37014	0.00635677	0.0682675	Non-significant
TNFRSF9	OID20985	Q07011	Neurology	Timepoint	2.52604	0.842012	3	92.5537	4.35884	0.00643342	0.0689307	Non-significant
KIT	OID20370	P10721	Cardiometabolic	Timepoint	1.31796	0.439321	3	92.8498	4.35716	0.00643987	0.0689307	Non-significant
RBFOX3	OID30984	A6NFN3	Neurology_II	progression_status	5.13926	5.13926	1	56.7898	8.00321	0.00644198	0.0689307	Non-significant
HRC	OID30211	P23327	Cardiometabolic_II	Timepoint	1.1767	0.392233	3	92.2957	4.35144	0.00649814	0.0694474	Non-significant
DFFA	OID20620	O00273	Inflammation	Timepoint	8.31051	2.77017	3	95.1325	4.3374	0.00654638	0.0698783	Non-significant
ROBO4	OID30226	Q8WZ75	Cardiometabolic_II	Timepoint	0.373671	0.124557	3	93.4943	4.3351	0.00660191	0.0703858	Non-significant
DEFB103A_DEFB103B	OID30534	P81534	Inflammation_II	progression_status	2.05881	2.05881	1	68.3037	7.84779	0.00661341	0.0704232	Non-significant
BNIP3L	OID30525	O60238	Inflammation_II	Timepoint	5.3066	1.76887	3	96.2964	4.31983	0.00666395	0.0708758	Non-significant
CKB	OID30400	P12277	Cardiometabolic_II	progression_status	3.47851	3.47851	1	58.5904	7.90049	0.0067099	0.0712785	Non-significant
GALNT5	OID30295	Q7Z7M9	Cardiometabolic_II	progression_status	1.28896	1.28896	1	59.527	7.8871	0.00672386	0.0713409	Non-significant
OSM	OID20574	P13725	Inflammation	Timepoint	8.31355	2.77118	3	93.3383	4.31938	0.00673446	0.0713675	Non-significant
GORASP2	OID31438	Q9H8Y8	Oncology_II	Timepoint:progression_status	1.2084	0.402799	3	97.4907	4.30304	0.00677752	0.0717375	Non-significant
PLSCR3	OID31146	Q9NRY6	Neurology_II	Timepoint	1.80027	0.600092	3	92.1605	4.31629	0.00678807	0.0717527	Non-significant
SERPINB9	OID20932	P50453	Neurology	Timepoint	4.88763	1.62921	3	93.8131	4.31075	0.00679522	0.0717527	Non-significant
ARSB	OID21331	P15848	Oncology	Timepoint	1.93567	0.645223	3	93.2834	4.31032	0.00681124	0.071812	Non-significant
ENTR1	OID30231	Q96C92	Cardiometabolic_II	Timepoint	5.67714	1.89238	3	92.8658	4.31079	0.00681713	0.071812	Non-significant
ADAM23	OID20651	O75077	Inflammation	Timepoint	2.37762	0.792541	3	93.6051	4.30583	0.00684133	0.0719809	Non-significant
EBI3_IL27	OID21389	Q14213_Q8NEV9	Oncology	progression_status	1.26224	1.26224	1	58.8923	7.85285	0.00685734	0.0719977	Non-significant
GZMB	OID20604	P10144	Inflammation	Timepoint	4.5649	1.52163	3	95.4368	4.29871	0.00685926	0.0719977	Non-significant
CCN4	OID21444	O95388	Oncology	progression_status	1.84877	1.84877	1	55.7537	7.8717	0.0069019	0.0723592	Non-significant
TIMD4	OID20375	Q96H15	Cardiometabolic	Timepoint	4.12079	1.3736	3	93.1114	4.29748	0.00692378	0.0725023	Non-significant
TSPAN8	OID31470	P19075	Oncology_II	Timepoint:progression_status	8.01012	2.67004	3	92.6128	4.29502	0.00695673	0.072761	Non-significant
CD5	OID21449	P06127	Oncology	Timepoint	3.7108	1.23693	3	98.5098	4.27834	0.00696566	0.0727681	Non-significant
LCN2	OID20392	P80188	Cardiometabolic	Timepoint	4.2524	1.41747	3	95.4724	4.28474	0.00697774	0.072808	Non-significant
PAXX	OID30591	Q9BUH6	Inflammation_II	Timepoint	6.44799	2.14933	3	95.3	4.27459	0.00706962	0.0736795	Non-significant
APOF	OID30701	Q13790	Inflammation_II	Timepoint	1.59032	0.530107	3	94.4521	4.27464	0.00708897	0.0737711	Non-significant
TIMM10	OID30358	P62072	Cardiometabolic_II	Timepoint	0.810714	0.270238	3	96.9549	4.26674	0.00710068	0.0737711	Non-significant
ADH1B	OID30612	P00325	Inflammation_II	Timepoint:progression_status	13.0698	4.35661	3	97.9434	4.26351	0.00710713	0.0737711	Non-significant
PDLIM5	OID31063	Q96HC4	Neurology_II	progression_status	3.24962	3.24962	1	58.5669	7.7812	0.00711188	0.0737711	Non-significant
AP3B1	OID31478	O00203	Oncology_II	Timepoint	7.89582	2.63194	3	93.3936	4.26338	0.00721348	0.0746802	Non-significant
UFD1	OID31486	Q92890	Oncology_II	Timepoint:progression_status	6.75069	2.25023	3	96.1583	4.25487	0.0072238	0.0746802	Non-significant
TNFRSF8	OID21049	P28908	Neurology	Timepoint	4.3045	1.43483	3	95.213	4.25721	0.00722493	0.0746802	Non-significant
PPL	OID30564	O60437	Inflammation_II	Timepoint:progression_status	4.84025	1.61342	3	94.8918	4.25513	0.00725106	0.0748122	Non-significant
ANGPTL4	OID20703	Q9BY76	Inflammation	Timepoint	6.92719	2.30906	3	94.2813	4.25635	0.00725467	0.0748122	Non-significant
VAMP5	OID20071	O95183	Cardiometabolic	Timepoint	11.7385	3.91283	3	93.5204	4.25579	0.00727811	0.0748864	Non-significant
CA14	OID21401	Q9ULX7	Oncology	Timepoint	2.90827	0.969422	3	92.8956	4.25707	0.00728196	0.0748864	Non-significant
SNCA	OID30645	P37840	Inflammation_II	Timepoint	13.6888	4.56295	3	97.2496	4.24501	0.00728735	0.0748864	Non-significant
PPM1F	OID30350	P49593	Cardiometabolic_II	Timepoint	2.419	0.806332	3	94.8914	4.24716	0.00732267	0.0749397	Non-significant
SDHB	OID31436	P21912	Oncology_II	Timepoint	13.1781	4.3927	3	94.5184	4.24708	0.00733232	0.0749397	Non-significant
ACRBP	OID31385	Q8NEB7	Oncology_II	progression_status	0.617557	0.617557	1	66.9817	7.64894	0.00733327	0.0749397	Non-significant
AFP	OID20978	P02771	Neurology	Timepoint	6.72397	2.24132	3	92.7204	4.25154	0.00733609	0.0749397	Non-significant
EIF4G3	OID31022	O43432	Neurology_II	Timepoint	3.28454	1.09485	3	104.909	4.22141	0.00734048	0.0749397	Non-significant
NACC1	OID31393	Q96RE7	Oncology_II	Timepoint	5.28431	1.76144	3	94.158	4.2468	0.00734353	0.0749397	Non-significant
KYAT1	OID20232	Q16773	Cardiometabolic	Timepoint:progression_status	6.63474	2.21158	3	96.0789	4.23984	0.00736109	0.0750321	Non-significant
LRPAP1	OID21059	P30533	Neurology	progression_status	1.59566	1.59566	1	59.289	7.69491	0.00739338	0.0752523	Non-significant
EZR	OID21017	P15311	Neurology	Timepoint	2.41691	0.805635	3	93.7395	4.24174	0.00739976	0.0752523	Non-significant
FOLR1	OID21529	P15328	Oncology	Timepoint	3.32966	1.10989	3	93.8235	4.23512	0.00745828	0.0757415	Non-significant
SLITRK6	OID20094	Q9H5Y7	Cardiometabolic	Timepoint:progression_status	2.643	0.881	3	94.2002	4.23338	0.00746506	0.0757415	Non-significant
DCTN6	OID20879	O00399	Neurology	Timepoint:progression_status	25.7114	8.57045	3	97.8168	4.22214	0.00748348	0.0758412	Non-significant
LRTM2	OID31020	Q8N967	Neurology_II	Timepoint:progression_status	0.772105	0.257368	3	94.5546	4.22871	0.00749942	0.0758435	Non-significant
RALY	OID31382	Q9UKM9	Oncology_II	Timepoint:progression_status	8.81057	2.93686	3	95.8825	4.22476	0.00750416	0.0758435	Non-significant
VWC2L	OID31002	B2RUY7	Neurology_II	Timepoint:progression_status	0.600433	0.200144	3	92.9834	4.23183	0.00750951	0.0758435	Non-significant
TGFA	OID20600	P01135	Inflammation	progression_status	2.10364	2.10364	1	61.3388	7.63971	0.00752898	0.0759531	Non-significant
TPR	OID30143	P12270	Cardiometabolic_II	Timepoint	9.4039	3.13463	3	93.2307	4.2257	0.00756016	0.0761805	Non-significant
CSF3	OID20491	P09919	Inflammation	progression_status	2.74279	2.74279	1	61.7665	7.6241	0.00757359	0.0762287	Non-significant
LEG1	OID30608	Q6P5S2	Inflammation_II	Timepoint:progression_status	3.09184	1.03061	3	92.0263	4.22294	0.00761669	0.0764398	Non-significant
TSNAX	OID30185	Q99598	Cardiometabolic_II	Timepoint:progression_status	3.53985	1.17995	3	99.2997	4.20408	0.00761909	0.0764398	Non-significant
BNIP3L	OID30525	O60238	Inflammation_II	progression_status	3.10588	3.10588	1	65.1319	7.58501	0.00762057	0.0764398	Non-significant
ADAMTS1	OID30528	Q9UHI8	Inflammation_II	Timepoint:progression_status	2.54416	0.848053	3	96.6728	4.20557	0.0076654	0.0767156	Non-significant
SELPLG	OID20560	Q14242	Inflammation	Timepoint	0.765349	0.255116	3	96.2664	4.20658	0.00766547	0.0767156	Non-significant
CCL14	OID20401	Q16627	Cardiometabolic	Timepoint	3.02756	1.00919	3	95.3393	4.20522	0.00770065	0.0769803	Non-significant
DNAJC9	OID31472	Q8WXX5	Oncology_II	Timepoint	6.04161	2.01387	3	97.4971	4.1977	0.00772094	0.0770357	Non-significant
CD164	OID21080	Q04900	Neurology	Timepoint	2.19018	0.73006	3	93.7856	4.20685	0.00772366	0.0770357	Non-significant
RSPO1	OID20938	Q2MKA7	Neurology	Timepoint	9.94341	3.31447	3	97.0932	4.19212	0.00778401	0.0774698	Non-significant
CLEC14A	OID21090	Q86T13	Neurology	Timepoint	2.79484	0.931612	3	95.4588	4.19612	0.00778476	0.0774698	Non-significant
KLK11	OID21518	Q9UBX7	Oncology	Timepoint:progression_status	1.93979	0.646596	3	92.5494	4.19928	0.00782774	0.0778097	Non-significant
IL17F	OID20456	Q96PD4	Inflammation	Timepoint:progression_status	4.19665	1.39888	3	92.1199	4.19663	0.00786463	0.0780682	Non-significant
SLC39A14	OID20852	Q15043	Neurology	Timepoint	5.51496	1.83832	3	96.1849	4.18533	0.00787146	0.0780682	Non-significant
NCR1	OID20566	O76036	Inflammation	Timepoint	1.65551	0.551836	3	91.198	4.19686	0.00788698	0.0781343	Non-significant
NGRN	OID31115	Q9NPE2	Neurology_II	progression_status	0.622958	0.622958	1	64.8377	7.509	0.00792206	0.0783937	Non-significant
CDH15	OID21005	P55291	Neurology	Timepoint	3.79245	1.26415	3	91.2752	4.19151	0.00793691	0.0784526	Non-significant
EGF	OID20698	P01133	Inflammation	Timepoint	9.55247	3.18416	3	97.3983	4.17392	0.00795399	0.0784529	Non-significant
PTRHD1	OID30659	Q6GMV3	Inflammation_II	Timepoint	5.02768	1.67589	3	97.9542	4.17251	0.00795474	0.0784529	Non-significant
TDO2	OID30910	P48775	Neurology_II	Timepoint:progression_status	5.03198	1.67733	3	95.6377	4.17532	0.00798296	0.0786433	Non-significant
DNAJA4	OID31130	Q8WW22	Neurology_II	Timepoint	4.16232	1.38744	3	95.4626	4.17406	0.00799973	0.0787206	Non-significant
PI16	OID30676	Q6UXB8	Inflammation_II	progression_status	0.65096	0.65096	1	62.6825	7.50214	0.00801411	0.0787741	Non-significant
PKLR	OID20682	P30613	Inflammation	Timepoint	6.8334	2.2778	3	96.3182	4.1686	0.00803277	0.0788697	Non-significant
KITLG	OID20196	P21583	Cardiometabolic	progression_status	1.70803	1.70803	1	56.3747	7.5353	0.00810233	0.0793929	Non-significant
PCOLCE	OID20384	Q15113	Cardiometabolic	Timepoint	2.24701	0.749004	3	94.2069	4.16676	0.00810408	0.0793929	Non-significant
GCNT1	OID21379	Q02742	Oncology	Timepoint	4.77808	1.59269	3	102.035	4.14497	0.00813695	0.0796265	Non-significant
HSPG2	OID20383	P98160	Cardiometabolic	Timepoint	1.4344	0.478133	3	93.2152	4.1649	0.00814852	0.0796514	Non-significant
CA1	OID20409	P00915	Cardiometabolic	Timepoint	4.31314	1.43771	3	95.9266	4.14648	0.00826535	0.0806021	Non-significant
DUSP13	OID31394	Q6B8I1	Oncology_II	progression_status	0.730805	0.730805	1	59.2066	7.46709	0.00827088	0.0806021	Non-significant
LZTFL1	OID30637	Q9NQ48	Inflammation_II	Timepoint	3.67655	1.22552	3	132	4.08193	0.00827321	0.0806021	Non-significant
NIT1	OID30252	Q86X76	Cardiometabolic_II	Timepoint	9.92244	3.30748	3	97.6681	4.13681	0.00832159	0.0808601	Non-significant
ZNRD2	OID31450	O60232	Oncology_II	Timepoint:progression_status	12.9702	4.32339	3	91.2957	4.15279	0.00832322	0.0808601	Non-significant
LMOD1	OID31014	P29536	Neurology_II	progression_status	1.72361	1.72361	1	57.407	7.46951	0.0083272	0.0808601	Non-significant
ITGA2	OID30570	P17301	Inflammation_II	Timepoint:progression_status	1.8867	0.6289	3	94.1383	4.14036	0.00837419	0.0811197	Non-significant
SPRED2	OID30423	Q7Z698	Inflammation_II	Timepoint:progression_status	2.03924	0.679747	3	98.5517	4.12832	0.00838812	0.0811197	Non-significant
CA2	OID21149	P00918	Neurology	Timepoint	7.0595	2.35317	3	96.6361	4.13264	0.00839021	0.0811197	Non-significant
AMOTL2	OID31351	Q9Y2J4	Oncology_II	Timepoint:progression_status	0.516474	0.172158	3	93.4356	4.14056	0.00839074	0.0811197	Non-significant
UPB1	OID30352	Q9UBR1	Cardiometabolic_II	progression_status	10.4761	10.4761	1	67.43	7.37203	0.00840554	0.0811738	Non-significant
LMOD1	OID30212	P29536	Cardiometabolic_II	progression_status	1.79052	1.79052	1	56.6705	7.44202	0.0084688	0.0815479	Non-significant
ADAMTS16	OID20089	Q8TE57	Cardiometabolic	progression_status	2.01035	2.01035	1	56.9904	7.43882	0.00846957	0.0815479	Non-significant
MCEE	OID31033	Q96PE7	Neurology_II	Timepoint	2.94847	0.982822	3	91.5391	4.13772	0.00847203	0.0815479	Non-significant
FXN	OID21442	Q16595	Oncology	Timepoint	4.92021	1.64007	3	95.0913	4.12054	0.00855648	0.082271	Non-significant
ASGR2	OID30679	P07307	Inflammation_II	Timepoint	2.44863	0.81621	3	93.3892	4.12239	0.00858211	0.082382	Non-significant
DSG4	OID21325	Q86SJ6	Oncology	progression_status	2.69419	2.69419	1	63.6309	7.35272	0.00859997	0.082382	Non-significant
CHIT1	OID20312	Q13231	Cardiometabolic	Timepoint	2.58723	0.86241	3	90.0614	4.12932	0.00860231	0.082382	Non-significant
GSTT2B	OID31097	P0CG30	Neurology_II	Timepoint:progression_status	8.64364	2.88121	3	91.6583	4.12471	0.0086054	0.082382	Non-significant
RRM2	OID21187	P31350	Oncology	Timepoint:progression_status	18.499	6.16632	3	94.0714	4.1158	0.00863377	0.0825639	Non-significant
EGFL7	OID21252	Q9UHF1	Oncology	Timepoint	3.92419	1.30806	3	94.74	4.1109	0.00866827	0.0827451	Non-significant
CTBS	OID30710	Q01459	Inflammation_II	Timepoint	1.15486	0.384954	3	93.9661	4.11253	0.00867149	0.0827451	Non-significant
CCS	OID20973	O14618	Neurology	Timepoint	3.36892	1.12297	3	96.2554	4.10566	0.008685	0.0827845	Non-significant
PRDX3	OID20483	P30048	Inflammation	Timepoint	11.4963	3.83211	3	95.4739	4.10457	0.00871699	0.0829997	Non-significant
C3	OID30776	P01024	Inflammation_II	Timepoint	11.1269	3.70898	3	101.44	4.07956	0.00884151	0.084054	Non-significant
EDF1	OID31010	O60869	Neurology_II	Timepoint	10.6148	3.53828	3	99.4757	4.08336	0.00884679	0.084054	Non-significant
GRP	OID30264	P07492	Cardiometabolic_II	Timepoint	4.02359	1.3412	3	91.193	4.10214	0.0088612	0.0841003	Non-significant
LPO	OID20963	P22079	Neurology	Timepoint	2.77277	0.924257	3	91.8344	4.09742	0.0088943	0.0843237	Non-significant
ACTN2	OID30192	P35609	Cardiometabolic_II	progression_status	2.40023	2.40023	1	62.8795	7.2841	0.00892333	0.0845081	Non-significant
MDK	OID21489	P21741	Oncology	progression_status	5.44249	5.44249	1	63.4072	7.26618	0.008986	0.0850102	Non-significant
RTBDN	OID21343	Q9BSG5	Oncology	progression_status	3.97246	3.97246	1	59.1668	7.29575	0.00900179	0.0850684	Non-significant
REG3G	OID31408	Q6UW15	Oncology_II	Timepoint	6.43525	2.14508	3	100.335	4.06388	0.00904244	0.0852784	Non-significant
FGF23	OID21411	Q9GZV9	Oncology	Timepoint:progression_status	6.87784	2.29261	3	90.2277	4.08816	0.00904336	0.0852784	Non-significant
IL18	OID20694	Q14116	Inflammation	Timepoint	6.31707	2.10569	3	93.7376	4.07637	0.0090737	0.085409	Non-significant
TNFRSF11B	OID20735	O00300	Inflammation	progression_status	1.40627	1.40627	1	56.345	7.30271	0.00908157	0.085409	Non-significant
S100P	OID20103	P25815	Cardiometabolic	Timepoint	14.883	4.96102	3	97.8759	4.06543	0.00908627	0.085409	Non-significant
GIPC3	OID31507	Q8TF64	Oncology_II	Timepoint	3.69046	1.23015	3	104.498	4.04988	0.00910339	0.0854309	Non-significant
AMY2B	OID20340	P19961	Cardiometabolic	progression_status	2.97987	2.97987	1	62.238	7.24774	0.00910798	0.0854309	Non-significant
CYP24A1	OID30091	Q07973	Cardiometabolic_II	progression_status	1.45594	1.45594	1	56.7617	7.28463	0.00914549	0.0856916	Non-significant
CC2D1A	OID20958	Q6P1N0	Neurology	Timepoint	5.64629	1.8821	3	95.5896	4.06161	0.00918956	0.0860131	Non-significant
TNFRSF14	OID20783	Q92956	Inflammation	Timepoint	1.8484	0.616135	3	93.0069	4.0611	0.00926715	0.0866474	Non-significant
TCOF1	OID30316	Q13428	Cardiometabolic_II	Timepoint	9.20096	3.06699	3	93.0484	4.05818	0.0092994	0.0868568	Non-significant
APOH	OID21072	P02749	Neurology	Timepoint:progression_status	2.31714	0.772381	3	97.216	4.04335	0.00935594	0.0872924	Non-significant
JUN	OID20424	P05412	Inflammation	progression_status	5.11884	5.11884	1	60.9315	7.17887	0.00947217	0.0882834	Non-significant
IGFBP2	OID20325	P18065	Cardiometabolic	progression_status	3.49031	3.49031	1	60.8055	7.16874	0.00952461	0.0886784	Non-significant
FNDC1	OID31127	Q4ZHG4	Neurology_II	Timepoint:progression_status	3.91854	1.30618	3	93.8595	4.03343	0.00956438	0.0889548	Non-significant
ATP5IF1	OID20760	Q9UII2	Inflammation	Timepoint:progression_status	11.7093	3.90309	3	95.7287	4.02398	0.00962384	0.0893367	Non-significant
CA6	OID21096	P23280	Neurology	progression_status	2.08237	2.08237	1	50.7212	7.24093	0.00962571	0.0893367	Non-significant
PTGR1	OID30297	Q14914	Cardiometabolic_II	Timepoint:progression_status	9.97237	3.32412	3	95.2372	4.02322	0.00964659	0.0894364	Non-significant
RCC1	OID31356	P18754	Oncology_II	progression_status	3.06128	3.06128	1	58.924	7.145	0.0097092	0.0898368	Non-significant
SERPINB5	OID20064	P36952	Cardiometabolic	Timepoint	72.975	24.325	3	105.075	3.99625	0.00972097	0.0898368	Non-significant
OGN	OID21123	P20774	Neurology	Timepoint	3.30311	1.10104	3	92.851	4.02198	0.00973006	0.0898368	Non-significant
RCC1	OID31356	P18754	Oncology_II	Timepoint:progression_status	5.16861	1.72287	3	93.1668	4.02116	0.00973053	0.0898368	Non-significant
CRISP3	OID30715	P54108	Inflammation_II	progression_status	0.296166	0.296166	1	51.854	7.19341	0.00979201	0.0903098	Non-significant
PLA2G7	OID21105	Q13093	Neurology	Timepoint	1.26443	0.421475	3	92.2065	4.0115	0.00987599	0.0909599	Non-significant
PYY	OID30150	P10082	Cardiometabolic_II	Timepoint	2.31455	0.771516	3	103.471	3.98611	0.00988313	0.0909599	Non-significant
THY1	OID21050	P04216	Neurology	Timepoint	2.05284	0.684281	3	95.0805	4.00145	0.00991452	0.0911536	Non-significant
CHAD	OID30660	O15335	Inflammation_II	progression_status	2.46166	2.46166	1	52.0412	7.14629	0.0100104	0.0919394	Non-significant
DNPH1	OID20744	O43598	Inflammation	Timepoint	4.08607	1.36202	3	95.6867	3.98306	0.0101253	0.0928979	Non-significant
CCAR2	OID31077	Q8N163	Neurology_II	Timepoint	8.15009	2.7167	3	94.4176	3.98482	0.01014	0.0929358	Non-significant
RBFOX3	OID30984	A6NFN3	Neurology_II	Timepoint:progression_status	7.68051	2.56017	3	92.9474	3.98687	0.010158	0.0930042	Non-significant
BEX3	OID31202	Q00994	Oncology_II	progression_status	1.74505	1.74505	1	132	6.79715	0.0101808	0.0931167	Non-significant
C1QBP	OID31007	Q07021	Neurology_II	progression_status	0.885413	0.885413	1	43.2988	7.21592	0.0102068	0.0932574	Non-significant
CPB1	OID20289	P15086	Cardiometabolic	Timepoint	10.9168	3.63892	3	96.7825	3.97296	0.0102216	0.0932964	Non-significant
ZBTB17	OID20082	Q13105	Cardiometabolic	Timepoint	6.79633	2.26544	3	94.3194	3.97727	0.010238	0.0933216	Non-significant
SARG	OID30331	Q9BW04	Cardiometabolic_II	Timepoint	4.64832	1.54944	3	93.5355	3.97804	0.0102516	0.0933216	Non-significant
PGA4	OID30699	P0DJD7	Inflammation_II	Timepoint	8.49937	2.83312	3	93.2899	3.97826	0.0102562	0.0933216	Non-significant
ERP29	OID30578	P30040	Inflammation_II	Timepoint	3.48525	1.16175	3	96.6067	3.96568	0.0103194	0.0937537	Non-significant
GADD45B	OID31261	O75293	Oncology_II	Timepoint	1.49131	0.497103	3	89.623	3.98194	0.0103249	0.0937537	Non-significant
GIP	OID30288	P09681	Cardiometabolic_II	Timepoint	2.46243	0.82081	3	91.9983	3.97264	0.0103674	0.0939587	Non-significant
GRAP2	OID20192	O75791	Cardiometabolic	Timepoint	6.0879	2.0293	3	132	3.90515	0.0103688	0.0939587	Non-significant
CD164	OID21080	Q04900	Neurology	progression_status	1.21543	1.21543	1	58.2875	7.0037	0.0104419	0.0945239	Non-significant
NCS1	OID21458	P62166	Oncology	Timepoint:progression_status	2.48688	0.828961	3	96.3248	3.95459	0.0104704	0.0946843	Non-significant
LACTB2	OID20150	Q53H82	Cardiometabolic	Timepoint	4.51433	1.50478	3	95.0243	3.95619	0.0104875	0.0947422	Non-significant
MAP1LC3B2	OID30074	A6NCE7	Cardiometabolic_II	Timepoint	1.06657	0.355522	3	93.433	3.95883	0.0105009	0.0947664	Non-significant
PTK7	OID20880	Q13308	Neurology	progression_status	10.8626	10.8626	1	69.8755	6.9107	0.0105278	0.0949115	Non-significant
CAT	OID30712	P04040	Inflammation_II	Timepoint	2.60998	0.869992	3	94.0854	3.95415	0.010542	0.0949428	Non-significant
XCL1	OID21398	P47992	Oncology	Timepoint	11.6718	3.89061	3	96.7961	3.94029	0.0106442	0.0957648	Non-significant
CTSZ	OID20365	Q9UBR2	Cardiometabolic	Timepoint	1.67018	0.556727	3	94.7372	3.94233	0.0106776	0.0959676	Non-significant
PPP1R9B	OID20643	Q96SB3	Inflammation	progression_status	4.49366	4.49366	1	69.3206	6.87447	0.0107399	0.0964191	Non-significant
TYRP1	OID30517	P17643	Inflammation_II	Timepoint	2.04124	0.680413	3	97.094	3.93125	0.0107555	0.0964191	Non-significant
HNRNPUL1	OID31037	Q9BUJ2	Neurology_II	progression_status	2.20142	2.20142	1	63.9306	6.9029	0.0107606	0.0964191	Non-significant
VSIR	OID20131	Q9H7M9	Cardiometabolic	Timepoint	1.608	0.536001	3	93.0189	3.93861	0.0107797	0.0964917	Non-significant
RIDA	OID30635	P52758	Inflammation_II	Timepoint:progression_status	8.12892	2.70964	3	98.7948	3.92049	0.0108519	0.0969447	Non-significant
IFNGR1	OID20678	P15260	Inflammation	Timepoint	1.20298	0.400992	3	94.7913	3.9291	0.0108523	0.0969447	Non-significant
AHSP	OID21078	Q9NZD4	Neurology	Timepoint	7.11507	2.37169	3	93.1611	3.93132	0.0108726	0.0970189	Non-significant
HJV	OID31006	Q6ZVN8	Neurology_II	Timepoint	1.36111	0.453703	3	98.4683	3.91889	0.0108826	0.0970189	Non-significant
GPKOW	OID20890	Q92917	Neurology	Timepoint	3.19776	1.06592	3	95.4196	3.92289	0.010917	0.0972277	Non-significant
TNFSF14	OID20953	O43557	Neurology	progression_status	2.89124	2.89124	1	64.5452	6.86723	0.0109341	0.0972817	Non-significant
SNRPB2	OID31132	P08579	Neurology_II	Timepoint	17.325	5.77499	3	94.5243	3.91865	0.0110018	0.0977852	Non-significant
ADAMTSL2	OID30370	Q86TH1	Cardiometabolic_II	Timepoint	2.49088	0.830294	3	93.687	3.91857	0.0110288	0.0978422	Non-significant
IL6	OID20101	P05231	Cardiometabolic	Timepoint:progression_status	13.7503	4.58344	3	94.7274	3.91609	0.0110304	0.0978422	Non-significant
SETMAR	OID20948	Q53H47	Neurology	Timepoint	3.34482	1.11494	3	94.3052	3.91501	0.0110582	0.0979099	Non-significant
SEPTIN8	OID31079	Q92599	Neurology_II	progression_status	2.60378	2.60378	1	61.0368	6.86788	0.0110603	0.0979099	Non-significant
FOXJ3	OID30445	Q9UPW0	Inflammation_II	progression_status	1.03753	1.03753	1	67.0986	6.82481	0.0110844	0.098025	Non-significant
JPT2	OID31520	Q9H910	Oncology_II	progression_status	4.2251	4.2251	1	64.2559	6.83929	0.0110997	0.0980621	Non-significant
PDIA4	OID30375	P13667	Cardiometabolic_II	Timepoint:progression_status	5.07326	1.69109	3	96.9222	3.90424	0.0111274	0.0982081	Non-significant
GLRX5	OID30663	Q86SX6	Inflammation_II	Timepoint	6.33214	2.11071	3	96.462	3.90022	0.0111967	0.0987217	Non-significant
DCXR	OID21480	Q7Z4W1	Oncology	Timepoint:progression_status	12.0661	4.02204	3	96.7907	3.8983	0.0112136	0.0987718	Non-significant
C1QBP	OID31007	Q07021	Neurology_II	Timepoint	1.439	0.479666	3	89.3007	3.90917	0.011303	0.0994595	Non-significant
SART1	OID30113	O43290	Cardiometabolic_II	progression_status	4.4165	4.4165	1	62.2593	6.8093	0.0113428	0.0997107	Non-significant
DCTPP1	OID20148	Q9H773	Cardiometabolic	Timepoint:progression_status	6.01728	2.00576	3	92.3032	3.89621	0.0113828	0.0999056	Non-significant
ASAH2	OID20996	Q9NR71	Neurology	progression_status	1.59348	1.59348	1	49.1834	6.91313	0.0113877	0.0999056	Non-significant
CD86	OID31500	P42081	Oncology_II	progression_status	1.4097	1.4097	1	63.0187	6.78594	0.0114483	0.10017	Non-significant
FNTA	OID31381	P49354	Oncology_II	progression_status	1.26522	1.26522	1	66.4719	6.76222	0.0114631	0.10017	Non-significant
BCL2	OID31454	P10415	Oncology_II	progression_status	3.76939	3.76939	1	68.1641	6.74973	0.0114803	0.10017	Non-significant
PTEN	OID20794	P60484	Neurology	Timepoint:progression_status	104.62	34.8733	3	101.357	3.87003	0.0114826	0.10017	Non-significant
AARSD1	OID21311	Q9BTE6	Oncology	Timepoint	4.01563	1.33854	3	95.7752	3.88052	0.0114948	0.10017	Non-significant
AP2B1	OID30949	P63010	Neurology_II	Timepoint:progression_status	1.77351	0.591171	3	132	3.8243	0.0114973	0.10017	Non-significant
ATRN	OID30735	O75882-2	Inflammation_II	Timepoint	0.4014	0.1338	3	96.5023	3.87879	0.0114973	0.10017	Non-significant
HAGH	OID21459	Q16775	Oncology	Timepoint	8.86665	2.95555	3	97.818	3.87398	0.0115267	0.100327	Non-significant
SLITRK1	OID30510	Q96PX8	Inflammation_II	Timepoint	1.677	0.559001	3	93.5722	3.88068	0.0115616	0.100441	Non-significant
SUOX	OID31031	P51687	Neurology_II	Timepoint:progression_status	11.6632	3.88772	3	98.0918	3.8707	0.0115657	0.100441	Non-significant
ECI2	OID30142	O75521	Cardiometabolic_II	Timepoint	3.26274	1.08758	3	97.7286	3.87088	0.011574	0.100441	Non-significant
TRIM58	OID31429	Q8NG06	Oncology_II	Timepoint	5.57443	1.85814	3	94.216	3.87394	0.0116377	0.100753	Non-significant
SCIN	OID30857	Q9Y6U3	Neurology_II	progression_status	7.13302	7.13302	1	73.7143	6.69469	0.0116398	0.100753	Non-significant
MAX	OID20877	P61244	Neurology	Timepoint:progression_status	40.8848	13.6283	3	98.1085	3.86397	0.0116625	0.100753	Non-significant
FCRL1	OID20172	Q96LA6	Cardiometabolic	Timepoint	1.63521	0.545071	3	93.138	3.87452	0.0116642	0.100753	Non-significant
NT5E	OID21498	P21589	Oncology	Timepoint:progression_status	13.1661	4.38869	3	93.212	3.87415	0.0116671	0.100753	Non-significant
CALB1	OID21306	P05937	Oncology	Timepoint	2.5516	0.850535	3	94.1724	3.87099	0.0116818	0.100782	Non-significant
CPA1	OID20280	P15085	Cardiometabolic	Timepoint	9.38771	3.12924	3	99.2106	3.85635	0.0117412	0.101195	Non-significant
LYZL2	OID31180	Q7Z4W2	Oncology_II	Timepoint	0.815649	0.271883	3	103.702	3.84562	0.0117739	0.101378	Non-significant
CLEC4A	OID20573	Q9UMR7	Inflammation	Timepoint:progression_status	1.33821	0.446071	3	94.1966	3.86345	0.0117906	0.101422	Non-significant
PDGFRA	OID20133	P16234	Cardiometabolic	progression_status	1.60506	1.60506	1	59.3817	6.75013	0.0118034	0.101434	Non-significant
STAMBP	OID20955	O95630	Neurology	Timepoint	3.99218	1.33073	3	98.0793	3.84841	0.0118912	0.102088	Non-significant
TNFSF12	OID20624	O43508	Inflammation	Timepoint	1.75676	0.585586	3	94.8599	3.8525	0.0119302	0.102315	Non-significant
THPO	OID20098	P40225	Cardiometabolic	progression_status	2.87283	2.87283	1	62.2797	6.70681	0.0119438	0.102315	Non-significant
CXCL11	OID21042	O14625	Neurology	Timepoint	7.17738	2.39246	3	94.206	3.85242	0.0119525	0.102315	Non-significant
LRPAP1	OID21059	P30533	Neurology	Timepoint	2.39449	0.798162	3	94.8452	3.84906	0.0119817	0.102373	Non-significant
FURIN	OID21514	P09958	Oncology	Timepoint	1.8933	0.631102	3	95.0191	3.84843	0.0119854	0.102373	Non-significant
TPSD1	OID30982	Q9BZJ3	Neurology_II	Timepoint:progression_status	1.57307	0.524356	3	95.1573	3.84748	0.0119952	0.102373	Non-significant
FGF3	OID30544	P11487	Inflammation_II	Timepoint	1.62486	0.541621	3	99.6997	3.83751	0.0120057	0.102373	Non-significant
HMOX1	OID20217	P09601	Cardiometabolic	Timepoint	10.6844	3.56146	3	94.2047	3.84612	0.012046	0.102517	Non-significant
CA14	OID21401	Q9ULX7	Oncology	Timepoint:progression_status	2.62888	0.876294	3	92.9142	3.84811	0.0120589	0.102517	Non-significant
EPCAM	OID20743	P16422	Inflammation	Timepoint:progression_status	5.55683	1.85228	3	92.4868	3.84871	0.0120644	0.102517	Non-significant
TAX1BP1	OID31075	Q86VP1	Neurology_II	Timepoint:progression_status	4.07209	1.35736	3	94.9755	3.84262	0.0120734	0.102517	Non-significant
COL15A1	OID30396	P39059	Cardiometabolic_II	Timepoint	1.48423	0.494745	3	94.4702	3.84323	0.0120806	0.102517	Non-significant
IMPA1	OID20907	P29218	Neurology	progression_status	1.69359	1.69359	1	65.2882	6.65226	0.0121639	0.103124	Non-significant
NPTX2	OID30390	P47972	Cardiometabolic_II	Timepoint	1.28521	0.428403	3	93.0029	3.83828	0.0122035	0.103295	Non-significant
GRHPR	OID30289	Q9UBQ7	Cardiometabolic_II	Timepoint:progression_status	7.64956	2.54985	3	98.4549	3.82578	0.0122194	0.103295	Non-significant
MYL4	OID30245	P12829	Cardiometabolic_II	Timepoint	2.87429	0.958095	3	92.7946	3.8375	0.0122223	0.103295	Non-significant
HDDC2	OID31447	Q7Z4H3	Oncology_II	Timepoint	1.02183	0.34061	3	94.1902	3.83385	0.0122309	0.103295	Non-significant
LAMP2	OID21035	P13473	Neurology	Timepoint	1.79317	0.597724	3	98.5514	3.82322	0.0122554	0.103403	Non-significant
CDH2	OID20170	P19022	Cardiometabolic	Timepoint	9.6754	3.22513	3	93.9594	3.82967	0.0123021	0.103697	Non-significant
CHRDL2	OID20223	Q6WN34	Cardiometabolic	Timepoint	7.56185	2.52062	3	94.7256	3.82293	0.01238	0.104254	Non-significant
TIMP1	OID20418	P01033	Cardiometabolic	progression_status	1.56338	1.56338	1	55.1776	6.68329	0.0124042	0.104263	Non-significant
BAIAP2	OID21250	Q9UQB8	Oncology	Timepoint	12.9304	4.31015	3	94.5205	3.82175	0.0124047	0.104263	Non-significant
PPP3R1	OID20902	P63098	Neurology	Timepoint	2.5639	0.854635	3	93.5808	3.82125	0.0124438	0.104411	Non-significant
PPL	OID30564	O60437	Inflammation_II	Timepoint	4.34339	1.4478	3	94.8654	3.81834	0.012446	0.104411	Non-significant
RASA1	OID20826	P20936	Neurology	Timepoint	1.79998	0.599992	3	99.0587	3.80827	0.0124702	0.104515	Non-significant
MED18	OID21236	Q9BUE0	Oncology	progression_status	2.52303	2.52303	1	70.8611	6.5683	0.0125063	0.104718	Non-significant
PDIA3	OID30573	P30101	Inflammation_II	Timepoint	2.8654	0.955135	3	95.8161	3.81061	0.0125348	0.104836	Non-significant
METAP1D	OID20519	Q6UB28	Inflammation	Timepoint	18.4926	6.16419	3	95.9156	3.8098	0.0125442	0.104836	Non-significant
SLK	OID31282	Q9H2G2	Oncology_II	Timepoint:progression_status	1.39447	0.464824	3	88.6218	3.82197	0.012609	0.105278	Non-significant
CWC15	OID31479	Q9P013	Oncology_II	Timepoint	7.77062	2.59021	3	95.5214	3.80567	0.0126215	0.105283	Non-significant
HPGDS	OID21266	O60760	Oncology	progression_status	2.13719	2.13719	1	64.285	6.58147	0.0126474	0.105399	Non-significant
HSDL2	OID30256	Q6YN16	Cardiometabolic_II	Timepoint	4.71668	1.57223	3	98.3066	3.79718	0.0126667	0.10546	Non-significant
GCC1	OID31147	Q96CN9	Neurology_II	progression_status	4.36856	4.36856	1	66.5551	6.56031	0.0127008	0.105607	Non-significant
LRRFIP1	OID31344	Q32MZ4	Oncology_II	Timepoint	1.65985	0.553285	3	99.1916	3.79284	0.0127083	0.105607	Non-significant
TNFRSF1B	OID21145	P20333	Neurology	Timepoint	2.81697	0.938991	3	93.1958	3.80349	0.0127335	0.105717	Non-significant
THBD	OID20231	P07204	Cardiometabolic	Timepoint	1.90327	0.634424	3	92.7165	3.80346	0.0127505	0.105758	Non-significant
HEPH	OID30337	Q9BQS7	Cardiometabolic_II	Timepoint	1.53274	0.510914	3	94.0741	3.79834	0.0127849	0.10589	Non-significant
BAG6	OID20114	P46379	Cardiometabolic	Timepoint:progression_status	2.94229	0.980765	3	95.3217	3.79517	0.0127936	0.10589	Non-significant
SCRIB	OID31455	Q14160	Oncology_II	Timepoint:progression_status	3.57259	1.19086	3	94.1815	3.79701	0.0128024	0.10589	Non-significant
RNF31	OID30473	Q96EP0	Inflammation_II	Timepoint:progression_status	1.02777	0.34259	3	98.6221	3.78647	0.0128269	0.105993	Non-significant
PRSS22	OID30483	Q9GZN4	Inflammation_II	Timepoint	7.32862	2.44287	3	93.9192	3.78784	0.0129576	0.106973	Non-significant
CIT	OID30970	O14578	Neurology_II	Timepoint	8.01085	2.67028	3	95.0248	3.78412	0.0129801	0.107058	Non-significant
GFRAL	OID31091	Q6UXV0	Neurology_II	progression_status	0.870255	0.870255	1	51.5099	6.62139	0.0129969	0.107097	Non-significant
FOXO3	OID21271	O43524	Oncology	progression_status	41.4607	41.4607	1	69.2316	6.49916	0.0130113	0.107115	Non-significant
IL1RN	OID20700	P18510	Inflammation	Timepoint	5.85093	1.95031	3	93.7779	3.77783	0.0131241	0.107866	Non-significant
IVD	OID20833	P26440	Neurology	Timepoint	79.1624	26.3875	3	100.329	3.76409	0.0131369	0.107866	Non-significant
DHPS	OID31357	P49366	Oncology_II	progression_status	2.04748	2.04748	1	64.0688	6.50752	0.0131409	0.107866	Non-significant
BLMH	OID20336	Q13867	Cardiometabolic	Timepoint	4.65939	1.55313	3	94.357	3.77494	0.0131514	0.107866	Non-significant
GAL	OID20727	P22466	Inflammation	Timepoint:progression_status	6.99746	2.33249	3	94.4988	3.77073	0.0132153	0.108233	Non-significant
CD177	OID21119	Q8N6Q3	Neurology	Timepoint	2.31797	0.772658	3	91.0231	3.77783	0.0132221	0.108233	Non-significant
LRRN1	OID20438	Q6UXK5	Inflammation	Timepoint	2.54151	0.847171	3	93.4813	3.77179	0.013233	0.108233	Non-significant
CNDP1	OID20347	Q96KN2	Cardiometabolic	progression_status	2.02195	2.02195	1	58.1617	6.52445	0.013281	0.108525	Non-significant
PTGES2	OID30561	Q9H7Z7	Inflammation_II	progression_status	1.82539	1.82539	1	64.686	6.4806	0.0132984	0.108567	Non-significant
LCAT	OID30677	P04180	Inflammation_II	Timepoint	1.81721	0.605735	3	95.3267	3.76116	0.0133449	0.108846	Non-significant
PQBP1	OID21172	O60828	Oncology	Timepoint	5.87773	1.95924	3	94.5823	3.75888	0.013408	0.109259	Non-significant
TACSTD2	OID21447	P09758	Oncology	Timepoint	3.284	1.09467	3	91.9425	3.76332	0.0134275	0.109317	Non-significant
CCN1	OID21368	O00622	Oncology	progression_status	4.49168	4.49168	1	66.3383	6.44577	0.0134747	0.109536	Non-significant
CGN	OID30894	Q9P2M7	Neurology_II	progression_status	5.07677	5.07677	1	62.749	6.46537	0.0134792	0.109536	Non-significant
SARG	OID30331	Q9BW04	Cardiometabolic_II	progression_status	2.52161	2.52161	1	59.9171	6.47399	0.0135419	0.109944	Non-significant
CCN1	OID21368	O00622	Oncology	Timepoint:progression_status	7.82406	2.60802	3	97.3538	3.74263	0.0135875	0.110213	Non-significant
LYSMD3	OID30950	Q7Z3D4	Neurology_II	Timepoint	3.25577	1.08526	3	91.9634	3.74947	0.0136587	0.110688	Non-significant
GUSB	OID20296	P08236	Cardiometabolic	progression_status	1.18457	1.18457	1	64.8897	6.41711	0.0137288	0.111054	Non-significant
TFF3	OID20371	Q07654	Cardiometabolic	Timepoint	2.73643	0.912143	3	93.397	3.74226	0.013729	0.111054	Non-significant
LPP	OID30190	Q93052	Cardiometabolic_II	Timepoint:progression_status	3.36338	1.12113	3	95.9087	3.73428	0.0137777	0.111346	Non-significant
MYL3	OID30251	P08590	Cardiometabolic_II	progression_status	2.84785	2.84785	1	52.9814	6.48628	0.013812	0.111484	Non-significant
ENPP7	OID20689	Q6UWV6	Inflammation	Timepoint	8.70146	2.90049	3	93.4167	3.73687	0.0138201	0.111484	Non-significant
PLA2G10	OID21002	O15496	Neurology	progression_status	2.63094	2.63094	1	55.7952	6.45634	0.0138645	0.111739	Non-significant
NFIC	OID30988	P08651	Neurology_II	Timepoint:progression_status	1.11549	0.37183	3	96.2319	3.72664	0.0138981	0.111831	Non-significant
SCGB3A1	OID30577	Q96QR1	Inflammation_II	Timepoint	0.487376	0.162459	3	91.1958	3.7369	0.0139012	0.111831	Non-significant
CA13	OID20225	Q8N1Q1	Cardiometabolic	Timepoint	7.43037	2.47679	3	98.178	3.7207	0.0139362	0.111924	Non-significant
GALNT5	OID30295	Q7Z7M9	Cardiometabolic_II	Timepoint:progression_status	1.82862	0.60954	3	93.5463	3.72974	0.0139382	0.111924	Non-significant
SART1	OID30113	O43290	Cardiometabolic_II	Timepoint	7.25175	2.41725	3	94.1636	3.72688	0.0139656	0.112043	Non-significant
SMTN	OID31154	P53814	Neurology_II	progression_status	2.94466	2.94466	1	67.3421	6.3657	0.014002	0.112164	Non-significant
MIF	OID21073	P14174	Neurology	Timepoint	16.5508	5.51692	3	97.6337	3.71677	0.0140225	0.112164	Non-significant
LIPF	OID30266	P07098	Cardiometabolic_II	progression_status	3.48389	3.48389	1	54.3141	6.4438	0.0140325	0.112164	Non-significant
WFDC12	OID21462	Q8WWY7	Oncology	Timepoint:progression_status	4.53279	1.51093	3	93.4689	3.72347	0.0140496	0.112164	Non-significant
EHBP1	OID30302	Q8NDI1	Cardiometabolic_II	Timepoint:progression_status	1.44928	0.483093	3	100.158	3.70913	0.0140747	0.112164	Non-significant
DDI2	OID30602	Q5TDH0	Inflammation_II	Timepoint	4.80521	1.60174	3	95.2513	3.71829	0.0140769	0.112164	Non-significant
GRP	OID30264	P07492	Cardiometabolic_II	progression_status	2.12383	2.12383	1	47.773	6.49586	0.0140819	0.112164	Non-significant
GBP4	OID20845	Q96PP9	Neurology	Timepoint:progression_status	1.00672	0.335575	3	94.4664	3.71954	0.0140825	0.112164	Non-significant
CXCL6	OID20613	P80162	Inflammation	Timepoint	4.26833	1.42278	3	94.2215	3.71689	0.0141376	0.112316	Non-significant
MAP4K5	OID20899	Q9Y4K4	Neurology	Timepoint	5.36886	1.78962	3	97.1234	3.71092	0.014142	0.112316	Non-significant
DEFB103A_DEFB103B	OID30534	P81534	Inflammation_II	Timepoint:progression_status	2.91132	0.970438	3	103.401	3.69913	0.0141518	0.112316	Non-significant
CES1	OID20244	P23141	Cardiometabolic	Timepoint:progression_status	8.26249	2.75416	3	96.1373	3.71161	0.0141633	0.112316	Non-significant
ADD1	OID30655	P35611	Inflammation_II	Timepoint:progression_status	7.40807	2.46936	3	97.8773	3.70748	0.0141774	0.112316	Non-significant
LAT	OID20640	O43561	Inflammation	progression_status	5.96165	5.96165	1	68.1248	6.33751	0.014178	0.112316	Non-significant
GSN	OID30714	P06396	Inflammation_II	progression_status	1.24665	1.24665	1	63.6934	6.35028	0.0142545	0.112821	Non-significant
PTS	OID20847	Q03393	Neurology	Timepoint	11.3202	3.77341	3	94.3464	3.70887	0.0142745	0.112838	Non-significant
CHRDL1	OID20771	Q9BU40	Inflammation	Timepoint:progression_status	3.8199	1.2733	3	93.2677	3.71063	0.0142823	0.112838	Non-significant
ECM1	OID30736	Q16610	Inflammation_II	Timepoint	2.6736	0.8912	3	100.857	3.69452	0.0143116	0.112968	Non-significant
NUDT2	OID21308	P50583	Oncology	progression_status	3.2185	3.2185	1	63.5956	6.34111	0.0143255	0.112977	Non-significant
DLL4	OID30255	Q9NR61	Cardiometabolic_II	progression_status	1.31492	1.31492	1	132	6.15741	0.0143428	0.113012	Non-significant
TRIAP1	OID21403	O43715	Oncology	progression_status	2.54072	2.54072	1	61.5389	6.34742	0.0143669	0.113101	Non-significant
TSPAN1	OID20078	O60635	Cardiometabolic	Timepoint	2.46165	0.82055	3	92.9322	3.70577	0.0143808	0.113109	Non-significant
VGF	OID31067	O15240	Neurology_II	Timepoint	1.52379	0.507929	3	97.7108	3.69486	0.0144075	0.113219	Non-significant
DAB2	OID21428	P98082	Oncology	progression_status	2.20422	2.20422	1	61.6155	6.33722	0.0144385	0.113361	Non-significant
BEX3	OID31202	Q00994	Oncology_II	Timepoint	2.80563	0.935211	3	132	3.64274	0.0145004	0.113648	Non-significant
CYTL1	OID30374	Q9NRR1	Cardiometabolic_II	Timepoint	1.14468	0.381559	3	93.3435	3.69821	0.0145009	0.113648	Non-significant
NT5C1A	OID31102	Q9BXI3	Neurology_II	progression_status	2.12146	2.12146	1	60.792	6.33197	0.014514	0.11365	Non-significant
PMS1	OID30943	P54277	Neurology_II	Timepoint	5.3554	1.78513	3	95.308	3.6927	0.0145293	0.113669	Non-significant
SIRPA	OID20304	P78324	Cardiometabolic	Timepoint	1.42466	0.474887	3	93.1135	3.69449	0.0145764	0.113937	Non-significant
ATG16L1	OID31466	Q676U5	Oncology_II	Timepoint	4.17025	1.39008	3	94.4344	3.68879	0.0146313	0.114228	Non-significant
PSMD9	OID21304	O00233	Oncology	Timepoint	3.39709	1.13236	3	95.2761	3.68667	0.0146396	0.114228	Non-significant
STX3	OID31090	Q13277	Neurology_II	Timepoint	0.782319	0.260773	3	94.0101	3.68727	0.0146742	0.114397	Non-significant
NDUFB7	OID31521	P17568	Oncology_II	progression_status	0.5422	0.5422	1	132	6.11069	0.0147092	0.114493	Non-significant
CORO6	OID30870	Q6QEF8	Neurology_II	Timepoint	3.71724	1.23908	3	88.8059	3.69624	0.0147126	0.114493	Non-significant
EIF4G3	OID31022	O43432	Neurology_II	progression_status	1.62272	1.62272	1	69.0474	6.25674	0.0147474	0.114596	Non-significant
SCARA5	OID21058	Q6ZMJ2	Neurology	Timepoint	5.44536	1.81512	3	96.5207	3.67813	0.0147517	0.114596	Non-significant
ACY1	OID20137	Q03154	Cardiometabolic	Timepoint:progression_status	10.859	3.61966	3	95.3016	3.67632	0.014828	0.115086	Non-significant
PTX3	OID20570	P26022	Inflammation	Timepoint	3.50295	1.16765	3	96.3477	3.67118	0.0148858	0.115372	Non-significant
HSDL2	OID30256	Q6YN16	Cardiometabolic_II	Timepoint:progression_status	4.55523	1.51841	3	98.3376	3.66721	0.014891	0.115372	Non-significant
NUDT15	OID30102	Q9NV35	Cardiometabolic_II	Timepoint	1.10522	0.368405	3	101.582	3.66004	0.0149182	0.115445	Non-significant
TNFRSF10A	OID20967	O00220	Neurology	progression_status	1.10848	1.10848	1	56.1453	6.30745	0.0149266	0.115445	Non-significant
PPM1F	OID30350	P49593	Cardiometabolic_II	Timepoint:progression_status	2.09041	0.696802	3	94.9189	3.67024	0.0149542	0.115558	Non-significant
NME3	OID20789	Q13232	Inflammation	Timepoint	1.27154	0.423846	3	93.8086	3.66748	0.0150464	0.116168	Non-significant
CLPP	OID20910	Q16740	Neurology	Timepoint	5.96339	1.9878	3	93.165	3.66492	0.0151183	0.116621	Non-significant
PRKRA	OID21225	O75569	Oncology	progression_status	2.98183	2.98183	1	68.8371	6.19535	0.0152304	0.117384	Non-significant
YES1	OID21348	P07947	Oncology	Timepoint	5.22054	1.74018	3	96.275	3.64998	0.0152861	0.117709	Non-significant
PDE5A	OID30584	O76074	Inflammation_II	Timepoint:progression_status	2.26823	0.756075	3	93.6718	3.65232	0.0153371	0.117999	Non-significant
SLAMF8	OID21214	Q9P0V8	Oncology	progression_status	3.05703	3.05703	1	56.7476	6.24075	0.0154066	0.118431	Non-significant
SCAMP3	OID21332	O14828	Oncology	Timepoint:progression_status	4.66476	1.55492	3	93.3201	3.64785	0.0154356	0.11855	Non-significant
CA12	OID21344	O43570	Oncology	progression_status	1.54312	1.54312	1	56.9925	6.22972	0.01548	0.118788	Non-significant
SLC9A3R2	OID31445	Q15599	Oncology_II	progression_status	1.3975	1.3975	1	53.0112	6.24017	0.0156256	0.119616	Non-significant
PTS	OID20847	Q03393	Neurology	Timepoint:progression_status	11.0973	3.6991	3	94.3719	3.63583	0.0156275	0.119616	Non-significant
TRAF3	OID30479	Q13114-2	Inflammation_II	progression_status	0.479144	0.479144	1	132	5.99859	0.0156286	0.119616	Non-significant
DIABLO	OID20184	Q9NR28	Cardiometabolic	Timepoint	12.9038	4.30128	3	95.766	3.62855	0.0157174	0.120023	Non-significant
CIT	OID30970	O14578	Neurology_II	progression_status	4.35186	4.35186	1	62.2886	6.16713	0.0157198	0.120023	Non-significant
SLC16A1	OID20799	P53985	Neurology	Timepoint:progression_status	6.09088	2.03029	3	91.4383	3.63653	0.0157277	0.120023	Non-significant
STX6	OID21219	O43752	Oncology	progression_status	5.35718	5.35718	1	60.6116	6.17468	0.0157363	0.120023	Non-significant
AMBP	OID21413	P02760	Oncology	Timepoint	1.68595	0.561983	3	98.2974	3.62075	0.0157799	0.120251	Non-significant
DPY30	OID21410	Q9C005	Oncology	Timepoint:progression_status	16.4066	5.46887	3	92.6116	3.63019	0.015805	0.120333	Non-significant
C1QTNF1	OID20367	Q9BXJ1	Cardiometabolic	Timepoint	8.26014	2.75338	3	96.5196	3.62143	0.0158297	0.120333	Non-significant
CD302	OID21328	Q8IX05	Oncology	progression_status	1.06765	1.06765	1	54.7077	6.20146	0.0158314	0.120333	Non-significant
PARP1	OID20500	P09874	Inflammation	Timepoint:progression_status	15.8304	5.27679	3	94.1903	3.62227	0.0158996	0.120746	Non-significant
GALNT7	OID21377	Q86SF2	Oncology	Timepoint	1.77297	0.590991	3	97.9482	3.61324	0.0159407	0.120954	Non-significant
CXCL1	OID20762	P09341	Inflammation	progression_status	3.16682	3.16682	1	44.8857	6.27202	0.0159673	0.121052	Non-significant
TXN	OID30670	P10599	Inflammation_II	Timepoint:progression_status	1.46849	0.489497	3	98.8036	3.6084	0.0160069	0.121248	Non-significant
FAM171A2	OID31005	A8MVW0	Neurology_II	Timepoint	2.00186	0.667285	3	90.5487	3.62303	0.016029	0.121312	Non-significant
CD274	OID20966	Q9NZQ7	Neurology	Timepoint	1.47856	0.492854	3	92.3446	3.6161	0.0160938	0.121698	Non-significant
CDHR1	OID20808	Q96JP9	Neurology	progression_status	1.24135	1.24135	1	63.1407	6.11041	0.0161461	0.121988	Non-significant
IGFBP3	OID20398	P17936	Cardiometabolic	progression_status	1.23212	1.23212	1	58.5238	6.12799	0.0162209	0.122448	Non-significant
AIFM1	OID21287	O95831	Oncology	Timepoint:progression_status	18.7045	6.23484	3	99.73	3.59359	0.0162731	0.122738	Non-significant
LIF	OID20824	P15018	Neurology	progression_status	6.46136	6.46136	1	60.3443	6.10315	0.0163365	0.12311	Non-significant
TREML1	OID30682	Q86YW5	Inflammation_II	progression_status	1.20765	1.20765	1	67.2202	6.06312	0.0163729	0.123279	Non-significant
INSL5	OID31448	Q9Y5Q6	Oncology_II	progression_status	5.60096	5.60096	1	66.3149	6.06217	0.0164171	0.123414	Non-significant
ATRN	OID30735	O75882-2	Inflammation_II	progression_status	0.20937	0.20937	1	64.734	6.06951	0.0164203	0.123414	Non-significant
FAM20A	OID30348	Q96MK3	Cardiometabolic_II	Timepoint:progression_status	2.58524	0.861745	3	96.1572	3.59203	0.0164329	0.123414	Non-significant
AKAP12	OID30571	Q02952	Inflammation_II	Timepoint	0.898084	0.299361	3	95.4706	3.59162	0.0164671	0.12343	Non-significant
FLRT2	OID20946	O43155	Neurology	Timepoint	1.99691	0.665637	3	93.56	3.59433	0.0164853	0.12343	Non-significant
ISM1	OID20538	B1AKI9	Inflammation	Timepoint	12.6631	4.22103	3	97.1313	3.5877	0.0164858	0.12343	Non-significant
MED18	OID21236	Q9BUE0	Oncology	Timepoint	4.12632	1.37544	3	101.055	3.58074	0.0164909	0.12343	Non-significant
ACTN4	OID20435	O43707	Inflammation	Timepoint	1.18103	0.393675	3	98.2098	3.58284	0.0165467	0.123742	Non-significant
CD1C	OID21483	P29017	Oncology	progression_status	0.660353	0.660353	1	52.1329	6.12972	0.0165778	0.12387	Non-significant
CBX2	OID30177	Q14781	Cardiometabolic_II	progression_status	1.08379	1.08379	1	73.3577	6.00779	0.0166256	0.124051	Non-significant
REG1B	OID20266	P48304	Cardiometabolic	progression_status	4.45242	4.45242	1	66.1214	6.03818	0.0166302	0.124051	Non-significant
SERPINA5	OID30763	P05154	Inflammation_II	progression_status	1.16187	1.16187	1	56.3248	6.08813	0.0166738	0.12419	Non-significant
TFF1	OID21154	P04155	Neurology	Timepoint:progression_status	7.44217	2.48072	3	93.2109	3.58507	0.0166895	0.12419	Non-significant
MARCO	OID20210	Q9UEW3	Cardiometabolic	progression_status	0.829021	0.829021	1	60.9441	6.05633	0.0167044	0.12419	Non-significant
THOP1	OID20194	P52888	Cardiometabolic	Timepoint:progression_status	4.12147	1.37382	3	93.987	3.58271	0.0167078	0.12419	Non-significant
TFF3	OID20371	Q07654	Cardiometabolic	progression_status	1.48136	1.48136	1	57.1195	6.0776	0.0167193	0.12419	Non-significant
HBEGF	OID21465	Q99075	Oncology	Timepoint	4.01948	1.33983	3	95.5909	3.57788	0.0167462	0.124286	Non-significant
MYBPC1	OID30296	Q00872	Cardiometabolic_II	progression_status	2.49282	2.49282	1	56.4683	6.07632	0.0167663	0.12433	Non-significant
USP28	OID31084	Q96RU2	Neurology_II	Timepoint:progression_status	4.32679	1.44226	3	93.3059	3.57783	0.0168363	0.124459	Non-significant
CBLIF	OID20179	P27352	Cardiometabolic	Timepoint	10.258	3.41934	3	91.6527	3.58102	0.0168371	0.124459	Non-significant
MAMDC4	OID31342	Q6UXC1	Oncology_II	Timepoint	2.82064	0.940212	3	93.8593	3.57653	0.0168415	0.124459	Non-significant
CSH1	OID30667	P0DML2	Inflammation_II	Timepoint:progression_status	1.33578	0.445262	3	132	3.52534	0.0168486	0.124459	Non-significant
VAMP8	OID30555	Q9BV40	Inflammation_II	Timepoint	9.30971	3.10324	3	93.7744	3.57608	0.0168543	0.124459	Non-significant
NBN	OID20442	O60934	Inflammation	progression_status	5.48198	5.48198	1	62.542	6.02331	0.0169147	0.124675	Non-significant
MAD1L1	OID20904	Q9Y6D9	Neurology	progression_status	5.20222	5.20222	1	57.9742	6.04898	0.0169188	0.124675	Non-significant
OTUD7B	OID31064	Q6GQQ9	Neurology_II	progression_status	1.7455	1.7455	1	63.5112	6.01698	0.0169259	0.124675	Non-significant
CFHR5	OID30716	Q9BXR6	Inflammation_II	Timepoint	3.34883	1.11628	3	96.0506	3.56639	0.0169697	0.124893	Non-significant
CDC27	OID21238	P30260	Oncology	Timepoint	14.1771	4.72569	3	102.071	3.55158	0.0170685	0.125515	Non-significant
WFDC1	OID31366	Q9HC57	Oncology_II	Timepoint	0.825096	0.275032	3	95.2396	3.56086	0.0171179	0.125774	Non-significant
PPM1B	OID30548	O75688	Inflammation_II	Timepoint	1.52635	0.508785	3	101.316	3.54871	0.0171557	0.125849	Non-significant
ERBIN	OID21323	Q96RT1	Oncology	Timepoint	3.67104	1.22368	3	95.31	3.55891	0.0171567	0.125849	Non-significant
ITGA11	OID20581	Q9UKX5	Inflammation	progression_status	1.21049	1.21049	1	59.3739	6.00886	0.0171959	0.12601	Non-significant
FAM20A	OID30348	Q96MK3	Cardiometabolic_II	progression_status	1.43417	1.43417	1	64.3758	5.97806	0.0172312	0.12601	Non-significant
ERCC1	OID31223	P07992	Oncology_II	Timepoint	1.13234	0.377445	3	103.83	3.54105	0.0172361	0.12601	Non-significant
KIRREL2	OID20873	Q6UWL6	Neurology	Timepoint	2.49236	0.830787	3	94.2568	3.55622	0.0172556	0.12601	Non-significant
DPT	OID20278	Q07507	Cardiometabolic	Timepoint	1.88586	0.62862	3	91.2214	3.56178	0.0172611	0.12601	Non-significant
CLPP	OID20910	Q16740	Neurology	Timepoint:progression_status	5.78908	1.92969	3	93.1935	3.5578	0.0172645	0.12601	Non-significant
CES1	OID20244	P23141	Cardiometabolic	Timepoint	7.90668	2.63556	3	96.1087	3.55178	0.0172787	0.12601	Non-significant
GGT1	OID21075	P19440	Neurology	Timepoint:progression_status	4.75745	1.58582	3	92.738	3.55702	0.0172998	0.12606	Non-significant
VEGFA	OID20650	P15692	Inflammation	Timepoint:progression_status	2.24123	0.747078	3	93.9002	3.55192	0.0173621	0.126381	Non-significant
YAP1	OID31113	P46937	Neurology_II	Timepoint	2.89548	0.965158	3	93.5304	3.55213	0.0173725	0.126381	Non-significant
PTS	OID20847	Q03393	Neurology	progression_status	6.07838	6.07838	1	61.4164	5.97441	0.0174005	0.12648	Non-significant
ADH1B	OID30612	P00325	Inflammation_II	progression_status	6.07	6.07	1	67.7017	5.94029	0.0174316	0.126602	Non-significant
PNMA2	OID30842	Q9UL42	Neurology_II	progression_status	1.15984	1.15984	1	132	5.79484	0.0174565	0.126678	Non-significant
TBC1D17	OID20844	Q9HA65	Neurology	Timepoint	1.98702	0.662339	3	103.321	3.52681	0.0175635	0.12735	Non-significant
POF1B	OID30504	Q8WVV4	Inflammation_II	Timepoint:progression_status	3.57721	1.1924	3	96.6702	3.53069	0.0177163	0.128352	Non-significant
SLC39A14	OID20852	Q15043	Neurology	Timepoint:progression_status	4.65181	1.5506	3	96.2184	3.53028	0.0177428	0.128438	Non-significant
CRTAM	OID20914	O95727	Neurology	Timepoint:progression_status	2.69601	0.898669	3	94.3152	3.53012	0.0178217	0.128888	Non-significant
TRIM40	OID30885	Q6P9F5	Neurology_II	Timepoint	4.08282	1.36094	3	97.8416	3.52337	0.0178341	0.128888	Non-significant
PBLD	OID20839	P30039	Neurology	progression_status	5.0568	5.0568	1	69.9893	5.88048	0.0178935	0.129153	Non-significant
VSNL1	OID31105	P62760	Neurology_II	Timepoint:progression_status	5.49076	1.83025	3	94.6559	3.52597	0.0179001	0.129153	Non-significant
ZNF75D	OID31303	P51815	Oncology_II	Timepoint:progression_status	2.30637	0.76879	3	104.005	3.50817	0.0179554	0.129446	Non-significant
ANGPTL7	OID21412	O43827	Oncology	Timepoint:progression_status	2.24795	0.749318	3	94.343	3.5209	0.0180259	0.129848	Non-significant
PSIP1	OID20534	O75475	Inflammation	progression_status	7.04195	7.04195	1	62.2393	5.89494	0.0180889	0.130141	Non-significant
AIF1L	OID30204	Q9BQI0	Cardiometabolic_II	progression_status	1.10383	1.10383	1	62.2244	5.89426	0.0180961	0.130141	Non-significant
KRT18	OID21296	P05783	Oncology	Timepoint	19.4277	6.4759	3	93.7289	3.51743	0.0181289	0.130271	Non-significant
CTSC	OID20679	P53634	Inflammation	Timepoint	2.74337	0.914457	3	94.7314	3.51329	0.0181812	0.130541	Non-significant
CALB1	OID21306	P05937	Oncology	progression_status	1.29785	1.29785	1	57.4004	5.90682	0.0182301	0.130785	Non-significant
SLMAP	OID31441	Q14BN4	Oncology_II	progression_status	2.55611	2.55611	1	62.7974	5.87302	0.0182687	0.130892	Non-significant
RCOR1	OID20073	Q9UKL0	Cardiometabolic	Timepoint	18.0122	6.00408	3	93.7806	3.51061	0.0182808	0.130892	Non-significant
DXO	OID31080	O77932	Neurology_II	Timepoint	4.85794	1.61931	3	97.0085	3.50441	0.0182926	0.130892	Non-significant
OXCT1	OID30227	P55809	Cardiometabolic_II	Timepoint:progression_status	6.50492	2.16831	3	94.8522	3.50764	0.0183044	0.130892	Non-significant
TXLNA	OID20952	P40222	Neurology	Timepoint	7.47671	2.49224	3	94.9035	3.50485	0.0183661	0.131227	Non-significant
MCFD2	OID20171	Q8NI22	Cardiometabolic	progression_status	1.30798	1.30798	1	58.9414	5.87648	0.0184309	0.131534	Non-significant
OCLN	OID31069	Q16625	Neurology_II	Timepoint:progression_status	7.5737	2.52457	3	93.8562	3.50354	0.0184389	0.131534	Non-significant
GFRA1	OID21457	P56159	Oncology	progression_status	1.36499	1.36499	1	57.9536	5.87507	0.0184985	0.131749	Non-significant
GPRC5C	OID31340	Q9NQ84	Oncology_II	Timepoint	8.73245	2.91082	3	93.2187	3.50208	0.018499	0.131749	Non-significant
AMOTL2	OID31351	Q9Y2J4	Oncology_II	Timepoint	0.436322	0.145441	3	93.4022	3.49799	0.0185855	0.132259	Non-significant
TIMP1	OID20418	P01033	Cardiometabolic	Timepoint	2.45184	0.817281	3	92.3533	3.4938	0.0187272	0.133146	Non-significant
MAP2	OID31138	P11137	Neurology_II	progression_status	0.191767	0.191767	1	57.3817	5.8532	0.0187404	0.133146	Non-significant
NUDC	OID20623	Q9Y266	Inflammation	progression_status	2.57407	2.57407	1	58.3756	5.83488	0.0188616	0.133899	Non-significant
ODAM	OID20793	A1E959	Neurology	Timepoint	2.46856	0.822852	3	92.0287	3.48408	0.0189684	0.134387	Non-significant
SPINT3	OID31509	P49223	Oncology_II	progression_status	3.02564	3.02564	1	49.0491	5.88554	0.0189891	0.134387	Non-significant
LYPD8	OID21251	Q6UX82	Oncology	Timepoint:progression_status	66.5498	22.1833	3	101.551	3.46697	0.0189939	0.134387	Non-significant
STX7	OID30560	O15400	Inflammation_II	Timepoint:progression_status	2.93248	0.977492	3	93.2112	3.4808	0.0189945	0.134387	Non-significant
CD101	OID31480	Q93033	Oncology_II	Timepoint	0.991145	0.330382	3	93.5491	3.47968	0.0190065	0.134387	Non-significant
SIGLEC15	OID20812	Q6ZMC9	Neurology	progression_status	2.25373	2.25373	1	47.7951	5.8838	0.0191072	0.13499	Non-significant
CCDC28A	OID30973	Q8IWP9	Neurology_II	progression_status	1.35411	1.35411	1	69.9871	5.75043	0.0191551	0.135221	Non-significant
CA6	OID21096	P23280	Neurology	Timepoint:progression_status	2.99842	0.999475	3	91.4566	3.47542	0.0191984	0.135368	Non-significant
NUMB	OID30568	P49757	Inflammation_II	Timepoint	5.16798	1.72266	3	97.0703	3.46517	0.0192067	0.135368	Non-significant
ENDOU	OID31498	P21128	Oncology_II	Timepoint:progression_status	1.51051	0.503503	3	92.5924	3.46977	0.0192831	0.135798	Non-significant
ITIH3	OID20352	Q06033	Cardiometabolic	Timepoint	4.28952	1.42984	3	104.196	3.44731	0.0193728	0.136321	Non-significant
DEFB116	OID30823	Q30KQ4	Neurology_II	Timepoint	1.30543	0.435143	3	101.129	3.4495	0.0194295	0.136611	Non-significant
KRT6C	OID30169	P48668	Cardiometabolic_II	Timepoint	2.40487	0.801624	3	97.3942	3.45319	0.0194827	0.136876	Non-significant
IL17RA	OID21089	Q96F46	Neurology	Timepoint	1.08892	0.362972	3	92.6889	3.46003	0.0195132	0.136981	Non-significant
INSL5	OID31448	Q9Y5Q6	Oncology_II	Timepoint	9.55669	3.18556	3	97.4324	3.44788	0.0196106	0.137555	Non-significant
ADAM22	OID21001	Q9P0K1	Neurology	Timepoint	2.03827	0.679424	3	94.5034	3.44993	0.0196808	0.137667	Non-significant
ZHX2	OID31140	Q9Y6X8	Neurology_II	Timepoint:progression_status	3.63592	1.21197	3	93.9722	3.45015	0.019698	0.137667	Non-significant
SAFB2	OID31012	Q14151	Neurology_II	progression_status	0.94119	0.94119	1	64.4816	5.71963	0.0197032	0.137667	Non-significant
NARS1	OID31035	O43776	Neurology_II	progression_status	1.35052	1.35052	1	63.3186	5.72448	0.0197085	0.137667	Non-significant
NINJ1	OID21167	Q92982	Oncology	Timepoint	4.09754	1.36585	3	93.2248	3.4509	0.0197121	0.137667	Non-significant
APOL1	OID30708	O14791	Inflammation_II	Timepoint	17.0744	5.69148	3	93.3971	3.44909	0.019749	0.137667	Non-significant
PCYT2	OID31519	Q99447	Oncology_II	Timepoint	8.67706	2.89235	3	99.6205	3.43864	0.019752	0.137667	Non-significant
FZD10	OID30931	Q9ULW2	Neurology_II	Timepoint	1.45605	0.485348	3	95.9211	3.44447	0.0197556	0.137667	Non-significant
CCDC80	OID20226	Q76M96	Cardiometabolic	Timepoint	8.23793	2.74598	3	95.3471	3.44497	0.0197671	0.137667	Non-significant
YES1	OID21348	P07947	Oncology	progression_status	2.71155	2.71155	1	65.2376	5.68741	0.0200025	0.139127	Non-significant
SNAP25	OID30811	P60880	Neurology_II	progression_status	1.95354	1.95354	1	67.0172	5.67927	0.0200083	0.139127	Non-significant
TIMM10	OID30358	P62072	Cardiometabolic_II	Timepoint:progression_status	0.65195	0.217317	3	96.9904	3.43117	0.0200413	0.139247	Non-significant
ADH4	OID20117	P08319	Cardiometabolic	Timepoint:progression_status	12.72	4.23999	3	95.128	3.43328	0.0200658	0.139307	Non-significant
CNTN2	OID21426	Q02246	Oncology	Timepoint:progression_status	2.34154	0.780515	3	92.9406	3.43409	0.0201404	0.139715	Non-significant
ATXN10	OID20865	Q9UBB4	Neurology	progression_status	15.223	15.223	1	132	5.52493	0.0202288	0.140218	Non-significant
TG	OID31359	P01266	Oncology_II	Timepoint:progression_status	6.16399	2.05466	3	92.9977	3.42946	0.0202539	0.140282	Non-significant
SSNA1	OID31453	O43805	Oncology_II	Timepoint	2.44254	0.814181	3	100.441	3.41488	0.0203157	0.140459	Non-significant
HMOX2	OID20887	P30519	Neurology	progression_status	5.30247	5.30247	1	62.6725	5.66845	0.0203248	0.140459	Non-significant
EBAG9	OID20918	O00559	Neurology	Timepoint	8.3653	2.78843	3	94.9585	3.42316	0.0203273	0.140459	Non-significant
LEP	OID20187	P41159	Cardiometabolic	Timepoint	5.69661	1.89887	3	92.843	3.42258	0.0204345	0.141066	Non-significant
TNFRSF10A	OID20967	O00220	Neurology	Timepoint	1.80318	0.60106	3	93.3151	3.42015	0.0204752	0.141066	Non-significant
KHK	OID30241	P50053	Cardiometabolic_II	Timepoint:progression_status	12.9017	4.30055	3	97.2309	3.41354	0.0204767	0.141066	Non-significant
ENSA	OID31355	O43768	Oncology_II	Timepoint:progression_status	2.79971	0.933237	3	101.51	3.40673	0.0204832	0.141066	Non-significant
EDIL3	OID20081	O43854	Cardiometabolic	Timepoint:progression_status	1.49972	0.499908	3	92.9797	3.41989	0.0204968	0.141066	Non-significant
CXCL1	OID20762	P09341	Inflammation	Timepoint	5.18602	1.72867	3	90.5452	3.42372	0.0205111	0.141066	Non-significant
TK1	OID31294	P04183	Oncology_II	progression_status	1.24649	1.24649	1	61.9556	5.64851	0.0205738	0.141383	Non-significant
AIF1L	OID30204	Q9BQI0	Cardiometabolic_II	Timepoint	1.9184	0.639466	3	93.9103	3.41465	0.0205893	0.141383	Non-significant
PRSS53	OID31093	Q2L4Q9	Neurology_II	Timepoint	0.603787	0.201262	3	91.3886	3.41762	0.0206272	0.141533	Non-significant
CCDC28A	OID30973	Q8IWP9	Neurology_II	Timepoint	2.40269	0.800896	3	100.017	3.40113	0.0206843	0.141805	Non-significant
VSIG4	OID21144	Q9Y279	Neurology	progression_status	1.99002	1.99002	1	54.9454	5.67479	0.020699	0.141805	Non-significant
MAN2B2	OID30306	Q9Y2E5	Cardiometabolic_II	Timepoint:progression_status	1.37049	0.456831	3	91.2482	3.41298	0.0207525	0.142061	Non-significant
POLR2F	OID21283	P61218	Oncology	progression_status	2.42899	2.42899	1	61.0765	5.63353	0.0207811	0.142146	Non-significant
CA5A	OID20075	P35218	Cardiometabolic	Timepoint:progression_status	16.7961	5.59871	3	95.0377	3.4035	0.0208272	0.142336	Non-significant
TP53BP1	OID30470	Q12888	Inflammation_II	Timepoint	2.28951	0.76317	3	93.5708	3.40514	0.020849	0.142336	Non-significant
NUDT16	OID31484	Q96DE0	Oncology_II	Timepoint	6.40469	2.1349	3	96.8907	3.39931	0.0208573	0.142336	Non-significant
HDAC8	OID30436	Q9BY41	Inflammation_II	Timepoint	0.817196	0.272399	3	100.26	3.39064	0.0209479	0.142844	Non-significant
MRPL24	OID30178	Q96A35	Cardiometabolic_II	progression_status	0.900606	0.900606	1	71.535	5.57099	0.0209906	0.143025	Non-significant
DDAH1	OID21299	O94760	Oncology	Timepoint:progression_status	9.60155	3.20052	3	96.1462	3.39378	0.021033	0.143203	Non-significant
SERPINA3	OID30786	P01011	Inflammation_II	progression_status	0.36609	0.36609	1	62.1636	5.60027	0.0210873	0.143424	Non-significant
EBAG9	OID20918	O00559	Neurology	Timepoint:progression_status	8.29204	2.76401	3	95.0002	3.39318	0.0210979	0.143424	Non-significant
CXADR	OID20561	P78310	Inflammation	Timepoint:progression_status	4.10139	1.36713	3	92.2556	3.39583	0.0211515	0.143638	Non-significant
CFI	OID30772	P05156	Inflammation_II	Timepoint	1.13218	0.377392	3	96.7856	3.38784	0.021162	0.143638	Non-significant
PLA2G15	OID21473	Q8NCC3	Oncology	Timepoint	1.62905	0.543017	3	95.6223	3.38573	0.0212675	0.144242	Non-significant
CBLN4	OID21386	Q9NTU7	Oncology	progression_status	5.71712	5.71712	1	65.2427	5.5635	0.0213439	0.14465	Non-significant
NUDC	OID20623	Q9Y266	Inflammation	Timepoint:progression_status	4.48133	1.49378	3	93.2136	3.38609	0.0213646	0.144679	Non-significant
IMMT	OID31397	Q16891	Oncology_II	progression_status	3.21861	3.21861	1	63.5282	5.56293	0.0214335	0.145034	Non-significant
PARK7	OID21160	Q99497	Neurology	Timepoint	4.32767	1.44256	3	97.5808	3.37316	0.0215196	0.145473	Non-significant
VIPR1	OID30193	P32241	Cardiometabolic_II	Timepoint	0.482105	0.160702	3	93.4232	3.37947	0.0215314	0.145473	Non-significant
LMNB2	OID31109	Q03252	Neurology_II	Timepoint	6.02407	2.00802	3	93.9363	3.37785	0.0215515	0.145497	Non-significant
CDC37	OID21470	Q16543	Oncology	Timepoint	3.92933	1.30978	3	95.4593	3.3746	0.0215713	0.14552	Non-significant
ENO2	OID21046	P09104	Neurology	Timepoint	5.49945	1.83315	3	94.2325	3.37355	0.0216537	0.145964	Non-significant
ICOSLG	OID21351	O75144	Oncology	Timepoint	4.21876	1.40625	3	100.67	3.36251	0.0216816	0.14604	Non-significant
LRRFIP1	OID31344	Q32MZ4	Oncology_II	Timepoint:progression_status	1.47129	0.490431	3	99.2371	3.36197	0.0217537	0.146414	Non-significant
CTSL	OID20228	P07711	Cardiometabolic	Timepoint	1.50127	0.500422	3	92.6099	3.37053	0.0218092	0.146673	Non-significant
AHNAK2	OID30244	Q8IVF2	Cardiometabolic_II	Timepoint	1.63128	0.54376	3	93.7383	3.36771	0.0218339	0.146673	Non-significant
MAD1L1	OID20904	Q9Y6D9	Neurology	Timepoint	8.69011	2.8967	3	93.126	3.36819	0.0218487	0.146673	Non-significant
NPY	OID21388	P01303	Oncology	Timepoint:progression_status	6.69552	2.23184	3	94.3714	3.36564	0.0218615	0.146673	Non-significant
SDC1	OID20169	P18827	Cardiometabolic	Timepoint	4.64146	1.54715	3	92.0958	3.36898	0.0218753	0.146673	Non-significant
NPM1	OID20961	P06748	Neurology	Timepoint	9.05563	3.01854	3	96.9199	3.3589	0.0219339	0.146954	Non-significant
MN1	OID30908	Q10571	Neurology_II	Timepoint:progression_status	3.75682	1.25227	3	132	3.31785	0.0219663	0.147045	Non-significant
CD83	OID20565	Q01151	Inflammation	Timepoint	1.68199	0.560663	3	92.6484	3.36415	0.0219809	0.147045	Non-significant
HSPB1	OID20230	P04792	Cardiometabolic	progression_status	2.86816	2.86816	1	61.0965	5.52221	0.0220231	0.147216	Non-significant
SYAP1	OID30636	Q96A49	Inflammation_II	Timepoint	1.02401	0.341338	3	96.0138	3.35394	0.0221088	0.147617	Non-significant
SIGLEC10	OID20537	Q96LC7	Inflammation	Timepoint:progression_status	1.64732	0.549106	3	92.2116	3.35982	0.0221199	0.147617	Non-significant
SELL	OID30752	P14151	Inflammation_II	Timepoint	0.835614	0.278538	3	97.8715	3.35017	0.0221333	0.147617	Non-significant
TGFB1	OID20621	P01137	Inflammation	Timepoint	1.86536	0.621787	3	93.2051	3.35646	0.0221659	0.147722	Non-significant
BCAT1	OID30312	P54687	Cardiometabolic_II	progression_status	0.986747	0.986747	1	57.3398	5.52645	0.0221924	0.147722	Non-significant
PTPRN2	OID20912	Q92932	Neurology	Timepoint:progression_status	1.76644	0.588814	3	91.223	3.35865	0.0221993	0.147722	Non-significant
EPPK1	OID30250	P58107	Cardiometabolic_II	Timepoint	10.329	3.443	3	92.8582	3.35236	0.0222952	0.148248	Non-significant
CD101	OID31480	Q93033	Oncology_II	Timepoint:progression_status	0.953477	0.317826	3	93.5711	3.34744	0.0223987	0.148824	Non-significant
TRIM24	OID31271	O15164	Oncology_II	Timepoint	2.8618	0.953932	3	94.6015	3.34319	0.02247	0.149185	Non-significant
FTCD	OID31137	O95954	Neurology_II	Timepoint:progression_status	10.0138	3.33795	3	96.5459	3.33947	0.0224878	0.149191	Non-significant
UBE2B	OID31368	P63146	Oncology_II	Timepoint	1.91263	0.637543	3	97.1422	3.33532	0.0225786	0.149681	Non-significant
TOMM20	OID30353	Q15388	Cardiometabolic_II	progression_status	1.64214	1.64214	1	57.1017	5.49249	0.0226028	0.149729	Non-significant
PSAPL1	OID31473	Q6NUJ1	Oncology_II	Timepoint:progression_status	1.63068	0.54356	3	93.895	3.33881	0.0226251	0.149764	Non-significant
PIK3AP1	OID20587	Q6ZUJ8	Inflammation	Timepoint:progression_status	4.45309	1.48436	3	96.4049	3.33397	0.0226485	0.149807	Non-significant
S100A4	OID21519	P26447	Oncology	Timepoint	2.27375	0.757917	3	94.5675	3.33566	0.0226829	0.149922	Non-significant
IDUA	OID21468	P35475	Oncology	progression_status	0.991738	0.991738	1	62.7441	5.4566	0.022704	0.149948	Non-significant
SYT1	OID31089	P21579	Neurology_II	Timepoint	0.881616	0.293872	3	92.4131	3.33727	0.0227379	0.150021	Non-significant
SCAMP3	OID21332	O14828	Oncology	progression_status	2.32792	2.32792	1	60.8655	5.46132	0.0227491	0.150021	Non-significant
CRIP2	OID20901	P52943	Neurology	progression_status	0.809307	0.809307	1	61.0933	5.45432	0.0228201	0.150377	Non-significant
TRIAP1	OID21403	O43715	Oncology	Timepoint	3.99783	1.33261	3	94.255	3.32922	0.0228798	0.150658	Non-significant
CST5	OID20995	P28325	Neurology	Timepoint	2.27856	0.75952	3	92.8997	3.32897	0.0229504	0.15101	Non-significant
PGA4	OID30699	P0DJD7	Inflammation_II	Timepoint:progression_status	7.10464	2.36821	3	93.3093	3.32544	0.0230318	0.15136	Non-significant
NAAA	OID20931	Q02083	Neurology	Timepoint	2.46672	0.822242	3	93.3627	3.32514	0.0230379	0.15136	Non-significant
SERPINE1	OID20342	P05121	Cardiometabolic	progression_status	3.26536	3.26536	1	58.9453	5.44029	0.0231121	0.151664	Non-significant
COMMD1	OID30222	Q8N668	Cardiometabolic_II	progression_status	1.74921	1.74921	1	68.6718	5.39874	0.0231186	0.151664	Non-significant
MRPS16	OID30489	Q9Y3D3	Inflammation_II	Timepoint	0.640547	0.213516	3	104.294	3.30433	0.0231763	0.151697	Non-significant
VWA5A	OID31198	O00534	Oncology_II	progression_status	1.01874	1.01874	1	64.5878	5.40946	0.0231789	0.151697	Non-significant
ORM1	OID30768	P02763	Inflammation_II	Timepoint:progression_status	0.858872	0.286291	3	95.1279	3.31686	0.0231942	0.151697	Non-significant
CLSTN3	OID31092	Q9BQT9	Neurology_II	Timepoint	1.58008	0.526695	3	95.1946	3.31659	0.0231988	0.151697	Non-significant
EPS8L2	OID21397	Q9H6S3	Oncology	Timepoint	5.4809	1.82697	3	94.6048	3.31715	0.0232096	0.151697	Non-significant
SERPINA7	OID30724	P05543	Inflammation_II	progression_status	0.391605	0.391605	1	61.5053	5.41512	0.0232712	0.151956	Non-significant
GADD45GIP1	OID30237	Q8TAE8	Cardiometabolic_II	progression_status	0.86415	0.86415	1	62.8288	5.40759	0.023292	0.151956	Non-significant
LCN15	OID31032	Q6UWW0	Neurology_II	Timepoint	2.04165	0.680549	3	95.9662	3.31186	0.023301	0.151956	Non-significant
JAM3	OID30586	Q9BX67	Inflammation_II	Timepoint	1.4278	0.475932	3	94.0562	3.31357	0.0233387	0.151979	Non-significant
DLL4	OID30255	Q9NR61	Cardiometabolic_II	Timepoint	2.09496	0.69832	3	132	3.27005	0.0233502	0.151979	Non-significant
DDX53	OID30944	Q86TM3	Neurology_II	progression_status	1.00965	1.00965	1	64.2867	5.39625	0.0233562	0.151979	Non-significant
NT5C	OID30294	Q8TCD5	Cardiometabolic_II	Timepoint:progression_status	4.36183	1.45394	3	93.3483	3.31228	0.0234096	0.152193	Non-significant
PRDX3	OID20483	P30048	Inflammation	Timepoint:progression_status	9.26464	3.08821	3	95.505	3.30778	0.0234406	0.152193	Non-significant
NPTXR	OID20191	O95502	Cardiometabolic	Timepoint	1.28295	0.427651	3	92.7528	3.31198	0.0234469	0.152193	Non-significant
AGR3	OID21243	Q8TD06	Oncology	Timepoint	43.9172	14.6391	3	99.922	3.30063	0.0234581	0.152193	Non-significant
CD84	OID20607	Q9UIB8	Inflammation	Timepoint	1.12874	0.376247	3	93.8093	3.30758	0.0235248	0.152233	Non-significant
SAMD9L	OID20536	Q8IVG5	Inflammation	Timepoint	4.72083	1.57361	3	95.3242	3.30481	0.0235357	0.152233	Non-significant
FKBP4	OID20960	Q02790	Neurology	Timepoint	4.23544	1.41181	3	93.0065	3.30805	0.0235495	0.152233	Non-significant
BPIFA2	OID30279	Q96DR5	Cardiometabolic_II	progression_status	3.24611	3.24611	1	47.8195	5.46755	0.023603	0.152233	Non-significant
POSTN	OID30410	Q15063	Cardiometabolic_II	progression_status	2.17578	2.17578	1	60.4597	5.39256	0.0236074	0.152233	Non-significant
SHMT1	OID20714	P34896	Inflammation	Timepoint:progression_status	11.1558	3.7186	3	97.4841	3.29887	0.0236137	0.152233	Non-significant
TAX1BP1	OID31075	Q86VP1	Neurology_II	Timepoint	3.49974	1.16658	3	94.9472	3.30253	0.0236201	0.152233	Non-significant
IL6ST	OID20147	P40189	Cardiometabolic	Timepoint	1.76719	0.589063	3	98.4332	3.29718	0.0236223	0.152233	Non-significant
ANXA2	OID30263	P07355	Cardiometabolic_II	Timepoint:progression_status	4.733	1.57767	3	94.0911	3.30333	0.0236364	0.152233	Non-significant
S100A16	OID20878	Q96FQ6	Neurology	progression_status	8.44417	8.44417	1	63.2101	5.37805	0.0236369	0.152233	Non-significant
SPINK5	OID21148	Q9NQ38	Neurology	Timepoint:progression_status	0.482849	0.16095	3	92.4636	3.30321	0.0237176	0.152641	Non-significant
FABP4	OID20245	P15090	Cardiometabolic	Timepoint	3.31714	1.10571	3	91.7456	3.30273	0.0237669	0.152847	Non-significant
IGFBP1	OID20246	P08833	Cardiometabolic	progression_status	7.59102	7.59102	1	69.2255	5.343	0.0237879	0.15287	Non-significant
BTN2A1	OID20713	Q7KYR7	Inflammation	Timepoint	1.07217	0.357388	3	93.4756	3.29838	0.0238114	0.15291	Non-significant
TCL1B	OID20058	O95988	Cardiometabolic	Timepoint	2.38087	0.793623	3	95.1268	3.29422	0.0238572	0.153066	Non-significant
FDX2	OID30147	Q6P4F2	Cardiometabolic_II	Timepoint:progression_status	3.27609	1.09203	3	100.201	3.2863	0.0238705	0.153066	Non-significant
NXPE4	OID30076	Q6UWF7	Cardiometabolic_II	Timepoint:progression_status	0.586274	0.195425	3	88.0291	3.30289	0.0239541	0.153491	Non-significant
SPON2	OID20221	Q9BUD6	Cardiometabolic	progression_status	1.7913	1.7913	1	61.9918	5.35459	0.0239967	0.153652	Non-significant
CXADR	OID20561	P78310	Inflammation	Timepoint	3.97774	1.32591	3	92.236	3.29345	0.0240181	0.15367	Non-significant
MTIF3	OID31513	Q9H2K0	Oncology_II	progression_status	2.01675	2.01675	1	66.6352	5.33292	0.0240343	0.15367	Non-significant
LMOD2	OID30864	Q6P5Q4	Neurology_II	progression_status	2.78195	2.78195	1	63.4728	5.34182	0.0240789	0.153843	Non-significant
L3HYPDH	OID30314	Q96EM0	Cardiometabolic_II	Timepoint	10.1017	3.36722	3	95.966	3.27623	0.0243589	0.155519	Non-significant
DDAH1	OID21299	O94760	Oncology	Timepoint	9.26654	3.08885	3	96.1162	3.27537	0.0243782	0.15553	Non-significant
GLIPR1	OID31517	P48060	Oncology_II	Timepoint	1.92228	0.64076	3	96.1792	3.27419	0.024411	0.155627	Non-significant
WWP2	OID20926	O00308	Neurology	Timepoint:progression_status	3.79182	1.26394	3	95.1114	3.27428	0.0244577	0.155812	Non-significant
ENTPD5	OID20104	O75356	Cardiometabolic	Timepoint	2.26163	0.753877	3	100.833	3.26505	0.024487	0.155817	Non-significant
QSOX1	OID30729	O00391	Inflammation_II	Timepoint	1.04535	0.348451	3	99.4221	3.26673	0.0244952	0.155817	Non-significant
VNN1	OID30711	O95497	Inflammation_II	Timepoint:progression_status	1.75134	0.583779	3	90.8701	3.27933	0.0245115	0.155817	Non-significant
SMOC1	OID21461	Q9H4F8	Oncology	progression_status	2.5404	2.5404	1	62.4204	5.30644	0.0245897	0.15604	Non-significant
RGMA	OID21065	Q96B86	Neurology	progression_status	0.93105	0.93105	1	60.4597	5.31478	0.0245922	0.15604	Non-significant
ITPR1	OID30216	Q14643	Cardiometabolic_II	Timepoint:progression_status	1.52875	0.509585	3	90.9352	3.27632	0.0245998	0.15604	Non-significant
COL15A1	OID30396	P39059	Cardiometabolic_II	Timepoint:progression_status	1.2625	0.420834	3	94.4889	3.26908	0.024646	0.156221	Non-significant
GSTA1	OID20166	P08263	Cardiometabolic	Timepoint:progression_status	17.278	5.75935	3	98.2072	3.26074	0.0247324	0.156505	Non-significant
NXPH3	OID30565	O95157	Inflammation_II	Timepoint:progression_status	2.84323	0.947744	3	99.1688	3.25924	0.0247367	0.156505	Non-significant
CBLN4	OID21386	Q9NTU7	Oncology	Timepoint	10.0579	3.35265	3	96.1953	3.26257	0.0247666	0.156505	Non-significant
UNC5D	OID30447	Q6UXZ4	Inflammation_II	Timepoint:progression_status	1.24717	0.415725	3	96.8564	3.26144	0.0247711	0.156505	Non-significant
HNF1A	OID30919	P20823	Neurology_II	Timepoint:progression_status	2.42323	0.807743	3	95.4494	3.26327	0.0247796	0.156505	Non-significant
NTF3	OID20591	P20783	Inflammation	Timepoint	2.85561	0.951869	3	94.4637	3.26396	0.0248049	0.156553	Non-significant
KLK14	OID21407	Q9P0G3	Oncology	Timepoint	2.37496	0.791654	3	91.3206	3.26597	0.0248979	0.157028	Non-significant
TYMP	OID20234	P19971	Cardiometabolic	Timepoint	7.86141	2.62047	3	93.4324	3.26173	0.0249234	0.157076	Non-significant
S100A14	OID30987	Q9HCY8	Neurology_II	Timepoint:progression_status	2.44878	0.816261	3	92.6331	3.25925	0.0250398	0.157619	Non-significant
DECR1	OID20579	Q16698	Inflammation	Timepoint:progression_status	10.788	3.59599	3	98.3872	3.25042	0.0250453	0.157619	Non-significant
NPTN	OID21235	Q9Y639	Oncology	Timepoint:progression_status	3.62486	1.20829	3	93.0323	3.25751	0.0250742	0.157689	Non-significant
COL3A1	OID30379	P02461	Cardiometabolic_II	progression_status	1.34511	1.34511	1	61.3225	5.26818	0.0251531	0.157881	Non-significant
PRTFDC1	OID20867	Q9NRG1	Neurology	Timepoint	84.0694	28.0231	3	97.468	3.24816	0.025157	0.157881	Non-significant
IGSF8	OID20167	Q969P0	Cardiometabolic	Timepoint	1.4604	0.486799	3	92.8926	3.25503	0.0251585	0.157881	Non-significant
TNFRSF10B	OID20981	O14763	Neurology	Timepoint	3.599	1.19967	3	92.094	3.25512	0.0251958	0.158002	Non-significant
XIAP	OID30490	P98170	Inflammation_II	progression_status	1.35235	1.35235	1	68.4431	5.23555	0.0252237	0.158005	Non-significant
APOB	OID30673	P04114	Inflammation_II	Timepoint	1.04056	0.346854	3	99.5683	3.24256	0.0252404	0.158005	Non-significant
KLK13	OID21291	Q9UKR3	Oncology	Timepoint:progression_status	1.69916	0.566385	3	92.653	3.25249	0.02525	0.158005	Non-significant
ASRGL1	OID30283	Q7L266	Cardiometabolic_II	Timepoint	10.7229	3.5743	3	98.8614	3.24227	0.0252804	0.158083	Non-significant
MAEA	OID21206	Q7L5Y9	Oncology	Timepoint	5.26085	1.75362	3	96.3051	3.24533	0.0252995	0.158091	Non-significant
SEZ6L2	OID21289	Q6UXD5	Oncology	Timepoint	3.04508	1.01503	3	93.0236	3.24943	0.0253277	0.158155	Non-significant
TACSTD2	OID21447	P09758	Oncology	progression_status	1.53203	1.53203	1	57.7944	5.2669	0.0253845	0.158397	Non-significant
ASAH2	OID20996	Q9NR71	Neurology	Timepoint	2.24582	0.748606	3	91.3972	3.24774	0.0254634	0.158777	Non-significant
GRPEL1	OID21309	Q9HAV7	Oncology	Timepoint:progression_status	19.1311	6.37705	3	93.7873	3.24085	0.0255615	0.159276	Non-significant
CDAN1	OID31076	Q8IWY9	Neurology_II	Timepoint	0.251299	0.0837664	3	101.075	3.22947	0.0255919	0.159353	Non-significant
CD34	OID21025	P28906	Neurology	Timepoint	1.90574	0.635246	3	93.7967	3.23865	0.025631	0.159484	Non-significant
LCP1	OID30367	P13796	Cardiometabolic_II	Timepoint	2.90377	0.967925	3	91.3895	3.23937	0.0257294	0.159945	Non-significant
HHEX	OID31107	Q03014	Neurology_II	progression_status	2.31	2.31	1	62.6624	5.21885	0.0257414	0.159945	Non-significant
BAG6	OID20114	P46379	Cardiometabolic	progression_status	1.34665	1.34665	1	63.5348	5.211	0.0258009	0.160202	Non-significant
ECI2	OID30142	O75521	Cardiometabolic_II	Timepoint:progression_status	2.71849	0.906162	3	97.7741	3.22518	0.0258751	0.160549	Non-significant
GDF15	OID20251	Q99988	Cardiometabolic	progression_status	2.03923	2.03923	1	53.599	5.24858	0.0259236	0.160716	Non-significant
LMNB2	OID31109	Q03252	Neurology_II	progression_status	3.10026	3.10026	1	60.1152	5.21519	0.0259383	0.160716	Non-significant
GP2	OID20090	P55259	Cardiometabolic	Timepoint	8.03991	2.67997	3	92.0703	3.22956	0.0260095	0.160971	Non-significant
SNRPB2	OID31132	P08579	Neurology_II	Timepoint:progression_status	14.2605	4.7535	3	94.5533	3.22551	0.026016	0.160971	Non-significant
LARP1	OID31372	Q6PKG0	Oncology_II	Timepoint:progression_status	4.07889	1.35963	3	92.9008	3.2255	0.0260983	0.161347	Non-significant
VWA5A	OID31198	O00534	Oncology_II	Timepoint:progression_status	1.8198	0.606599	3	95.554	3.22102	0.0261134	0.161347	Non-significant
RBM19	OID30090	Q9Y4C8	Cardiometabolic_II	Timepoint	3.09982	1.03327	3	94.4216	3.22122	0.0261617	0.161532	Non-significant
ACY3	OID30086	Q96HD9	Cardiometabolic_II	Timepoint	7.58534	2.52845	3	95.6102	3.21719	0.0262358	0.161797	Non-significant
CCL22	OID20765	O00626	Inflammation	progression_status	1.38487	1.38487	1	57.695	5.20422	0.0262414	0.161797	Non-significant
SF3B4	OID21278	Q15427	Oncology	Timepoint	5.31596	1.77199	3	96.0786	3.21426	0.0263092	0.16198	Non-significant
CXCL1	OID20762	P09341	Inflammation	Timepoint:progression_status	4.88087	1.62696	3	90.5487	3.22226	0.0263259	0.16198	Non-significant
CST5	OID20995	P28325	Neurology	Timepoint:progression_status	2.20294	0.734315	3	92.9125	3.21849	0.0263262	0.16198	Non-significant
CLGN	OID30957	O14967	Neurology_II	Timepoint	1.96444	0.654814	3	94.9964	3.21298	0.0264033	0.162218	Non-significant
FSTL1	OID30254	Q12841	Cardiometabolic_II	progression_status	0.41492	0.41492	1	59.8649	5.18233	0.0264076	0.162218	Non-significant
SMPD1	OID21028	P17405	Neurology	Timepoint:progression_status	2.87204	0.957348	3	93.2489	3.21511	0.02642	0.162218	Non-significant
NGF	OID20920	P01138	Neurology	progression_status	0.114353	0.114353	1	65.8871	5.14663	0.0265739	0.163049	Non-significant
ATP1B3	OID30065	P54709	Cardiometabolic_II	Timepoint	0.943013	0.314338	3	97.1842	3.19982	0.0267348	0.163902	Non-significant
HTRA2	OID21471	O43464	Oncology	Timepoint:progression_status	6.10645	2.03548	3	96.4379	3.20042	0.0267501	0.163902	Non-significant
NGFR	OID30300	P08138	Cardiometabolic_II	progression_status	0.532232	0.532232	1	69.2665	5.11404	0.0268756	0.164557	Non-significant
ABO	OID30675	P16442	Inflammation_II	Timepoint:progression_status	1.58408	0.528026	3	90.4336	3.2039	0.0269383	0.16472	Non-significant
APOA4	OID30733	P06727	Inflammation_II	Timepoint:progression_status	2.54769	0.849228	3	95.4171	3.19597	0.0269481	0.16472	Non-significant
TPSAB1	OID20642	Q15661	Inflammation	Timepoint	1.33828	0.446094	3	91.0063	3.20238	0.0269583	0.16472	Non-significant
TMOD4	OID31246	Q9NZQ9	Oncology_II	Timepoint	9.56887	3.18962	3	132	3.15662	0.0269919	0.16473	Non-significant
PRSS53	OID31093	Q2L4Q9	Neurology_II	Timepoint:progression_status	0.565447	0.188482	3	91.3961	3.2006	0.0269972	0.16473	Non-significant
IL20RA	OID20422	Q9UHF4	Inflammation	progression_status	3.18307	3.18307	1	63.902	5.12209	0.0270282	0.164805	Non-significant
SLC34A3	OID31203	Q8N130	Oncology_II	Timepoint	0.809191	0.26973	3	100.333	3.18574	0.027065	0.164915	Non-significant
DDT	OID30372	P30046	Cardiometabolic_II	Timepoint:progression_status	3.548	1.18267	3	94.3302	3.19293	0.0271042	0.16504	Non-significant
CDK1	OID31164	P06493	Oncology_II	Timepoint:progression_status	3.19668	1.06556	3	132	3.15072	0.0271961	0.165361	Non-significant
GOT1	OID30417	P17174	Cardiometabolic_II	Timepoint:progression_status	6.54321	2.18107	3	96.8106	3.18627	0.0272084	0.165361	Non-significant
NT5C1A	OID31102	Q9BXI3	Neurology_II	Timepoint:progression_status	3.20811	1.06937	3	92.9512	3.19177	0.0272131	0.165361	Non-significant
BTN3A2	OID20540	P78410	Inflammation	Timepoint	1.72451	0.574836	3	94.5069	3.1874	0.0272825	0.165668	Non-significant
PREB	OID20439	Q9HCU5	Inflammation	progression_status	1.07541	1.07541	1	66.4807	5.08392	0.0274477	0.166556	Non-significant
CDH23	OID31074	Q9H251	Neurology_II	Timepoint:progression_status	0.639012	0.213004	3	97.5917	3.17624	0.0275139	0.166843	Non-significant
KLK15	OID31427	Q9H2R5	Oncology_II	Timepoint	1.67181	0.55727	3	93.826	3.17943	0.0275888	0.167083	Non-significant
ENAH	OID20497	Q8N8S7	Inflammation	progression_status	6.05419	6.05419	1	65.558	5.07581	0.0276142	0.167083	Non-significant
DNAJB6	OID30613	O75190	Inflammation_II	Timepoint	3.28731	1.09577	3	97.2523	3.17374	0.027616	0.167083	Non-significant
MARS1	OID30658	P56192	Inflammation_II	progression_status	1.7922	1.7922	1	64.6395	5.07808	0.0276293	0.167083	Non-significant
PXN	OID20822	P49023	Neurology	progression_status	4.10548	4.10548	1	64.492	5.07433	0.0276925	0.167318	Non-significant
ZNF75D	OID31303	P51815	Oncology_II	progression_status	1.10505	1.10505	1	73.9553	5.04259	0.0277196	0.167318	Non-significant
ASS1	OID30170	P00966	Cardiometabolic_II	Timepoint:progression_status	7.79193	2.59731	3	96.9644	3.17098	0.027725	0.167318	Non-significant
GIP	OID30288	P09681	Cardiometabolic_II	Timepoint:progression_status	1.96914	0.656381	3	92.022	3.17682	0.0277724	0.167489	Non-significant
DPP6	OID21354	P42658	Oncology	Timepoint:progression_status	1.98794	0.662646	3	94.1432	3.16987	0.0279028	0.168083	Non-significant
TMED10	OID30068	P49755	Cardiometabolic_II	Timepoint	0.668206	0.222735	3	98.3519	3.1638	0.0279089	0.168083	Non-significant
PPP1CC	OID31360	P36873	Oncology_II	Timepoint	1.55612	0.518707	3	94.6822	3.16801	0.0279401	0.168156	Non-significant
KIR3DL1	OID21185	P43629	Oncology	progression_status	11.0104	11.0104	1	51.8038	5.11348	0.0279669	0.168202	Non-significant
NUMB	OID30568	P49757	Inflammation_II	progression_status	2.51084	2.51084	1	64.2241	5.05061	0.0280597	0.168645	Non-significant
RNF41	OID21179	Q9H4P4	Oncology	Timepoint	3.82196	1.27399	3	96.3416	3.16012	0.0281337	0.168914	Non-significant
APOH	OID21072	P02749	Neurology	Timepoint	1.81017	0.603389	3	97.1863	3.15869	0.0281428	0.168914	Non-significant
ZNRD2	OID31450	O60232	Oncology_II	Timepoint	9.89021	3.29674	3	91.2859	3.16665	0.028165	0.168932	Non-significant
GPR101	OID30819	Q96P66	Neurology_II	Timepoint	1.17945	0.393149	3	132	3.12135	0.0282357	0.169242	Non-significant
AGRN	OID20786	O00468	Inflammation	Timepoint	3.0358	1.01193	3	94.0563	3.15933	0.0282754	0.169364	Non-significant
TGM2	OID20141	P21980	Cardiometabolic	Timepoint	3.84512	1.28171	3	95.5653	3.15562	0.02833	0.169492	Non-significant
CLEC6A	OID21228	Q6EIG7	Oncology	Timepoint	2.60007	0.866689	3	93.2033	3.15889	0.0283351	0.169492	Non-significant
TGFBR1	OID30502	P36897	Inflammation_II	Timepoint:progression_status	1.42438	0.474792	3	132	3.11805	0.0283549	0.169495	Non-significant
UPK3A	OID30794	O75631	Neurology_II	Timepoint:progression_status	38.2491	12.7497	3	132	3.11709	0.0283897	0.169588	Non-significant
REG1A	OID20415	P05451	Cardiometabolic	progression_status	2.48031	2.48031	1	61.2909	5.0341	0.0284765	0.169991	Non-significant
TPRKB	OID31234	Q9Y3C4	Oncology_II	Timepoint:progression_status	1.86339	0.621131	3	99.8778	3.14487	0.0285058	0.170051	Non-significant
HAO1	OID21395	Q9UJM8	Oncology	Timepoint:progression_status	16.297	5.43234	3	97.0979	3.14717	0.0285547	0.170131	Non-significant
DFFA	OID20620	O00273	Inflammation	progression_status	3.20518	3.20518	1	63.9875	5.01853	0.0285577	0.170131	Non-significant
CASP4	OID31276	P49662	Oncology_II	Timepoint:progression_status	2.74372	0.914573	3	92.1671	3.15279	0.0286057	0.170301	Non-significant
KLK11	OID21518	Q9UBX7	Oncology	progression_status	0.779376	0.779376	1	52.9929	5.06162	0.0286386	0.170382	Non-significant
ZBTB17	OID20082	Q13105	Cardiometabolic	Timepoint:progression_status	5.37832	1.79277	3	94.3436	3.14744	0.0286824	0.170528	Non-significant
HMOX2	OID20887	P30519	Neurology	Timepoint	8.82911	2.94304	3	94.0425	3.14617	0.0287431	0.170723	Non-significant
IL1A	OID20488	P01583	Inflammation	Timepoint	5.21817	1.73939	3	132	3.10711	0.0287539	0.170723	Non-significant
OTUD7B	OID31064	Q6GQQ9	Neurology_II	Timepoint:progression_status	2.73379	0.911262	3	94.8283	3.14124	0.0288795	0.171353	Non-significant
NDRG1	OID20792	Q92597	Neurology	Timepoint	4.41043	1.47014	3	91.2766	3.14282	0.029011	0.172017	Non-significant
MMP1	OID20672	P03956	Inflammation	progression_status	4.34833	4.34833	1	58.2917	5.00612	0.029095	0.1724	Non-significant
KIR3DL2	OID31191	P43630	Oncology_II	Timepoint:progression_status	0.875766	0.291922	3	91.775	3.13899	0.0291218	0.172443	Non-significant
GPKOW	OID20890	Q92917	Neurology	Timepoint:progression_status	2.55257	0.850857	3	95.448	3.1314	0.0292044	0.172784	Non-significant
SAFB2	OID31012	Q14151	Neurology_II	Timepoint:progression_status	1.54557	0.51519	3	95.5793	3.13082	0.0292187	0.172784	Non-significant
ELAC1	OID31029	Q9H777	Neurology_II	Timepoint	3.49948	1.16649	3	97.9656	3.12574	0.0292864	0.173001	Non-significant
SUGT1	OID21229	Q9Y2Z0	Oncology	progression_status	3.4729	3.4729	1	65.7824	4.96387	0.0293069	0.173001	Non-significant
YWHAQ	OID30605	P27348	Inflammation_II	Timepoint:progression_status	2.81399	0.937998	3	95.2288	3.12818	0.0293329	0.173001	Non-significant
ABCA2	OID30146	Q9BZC7	Cardiometabolic_II	progression_status	0.761891	0.761891	1	132	4.85228	0.029345	0.173001	Non-significant
IGSF8	OID20167	Q969P0	Cardiometabolic	Timepoint:progression_status	1.40471	0.468238	3	92.9115	3.13092	0.0293535	0.173001	Non-significant
GIGYF2	OID31062	Q6Y7W6	Neurology_II	progression_status	2.92953	2.92953	1	56.0205	4.99325	0.0294533	0.173258	Non-significant
MEP1B	OID20168	Q16820	Cardiometabolic	progression_status	0.975953	0.975953	1	47.1848	5.04232	0.0294585	0.173258	Non-significant
DDR1	OID21009	Q08345	Neurology	Timepoint	3.01989	1.00663	3	94.842	3.12467	0.0294811	0.173258	Non-significant
IGDCC3	OID30862	Q8IVU1	Neurology_II	Timepoint:progression_status	1.37464	0.458214	3	98.0114	3.11983	0.0295015	0.173258	Non-significant
DGKZ	OID20466	Q13574	Inflammation	Timepoint	5.46997	1.82332	3	97.4618	3.12027	0.0295117	0.173258	Non-significant
TXNRD1	OID21135	Q16881	Neurology	Timepoint	1.8014	0.600466	3	95.1659	3.12301	0.0295256	0.173258	Non-significant
RRAS	OID30961	P10301	Neurology_II	progression_status	2.57012	2.57012	1	132	4.84074	0.0295346	0.173258	Non-significant
IL5RA	OID20601	Q01344	Inflammation	progression_status	1.18771	1.18771	1	50.6634	5.0142	0.0295595	0.173288	Non-significant
INSL4	OID31370	Q14641	Oncology_II	Timepoint:progression_status	3.80617	1.26872	3	90.5581	3.12824	0.0295808	0.173298	Non-significant
IL13	OID20430	P35225	Inflammation	Timepoint:progression_status	34.3987	11.4662	3	132	3.08128	0.0297183	0.173919	Non-significant
CACYBP	OID30649	Q9HB71	Inflammation_II	Timepoint	6.88105	2.29368	3	96.5553	3.11547	0.0297339	0.173919	Non-significant
SIRPA	OID20304	P78324	Cardiometabolic	progression_status	0.641272	0.641272	1	53.0996	4.98891	0.0297459	0.173919	Non-significant
PTP4A3	OID30469	O75365	Inflammation_II	Timepoint:progression_status	3.73668	1.24556	3	99.2347	3.10993	0.02981	0.174178	Non-significant
ZCCHC8	OID30117	Q6NZY4	Cardiometabolic_II	Timepoint	4.06334	1.35445	3	96.0821	3.11196	0.0298882	0.174519	Non-significant
VWA5A	OID31198	O00534	Oncology_II	Timepoint	1.75753	0.585843	3	95.5208	3.11081	0.0299596	0.174821	Non-significant
FAS	OID20316	P25445	Cardiometabolic	Timepoint	1.23239	0.410796	3	93.3807	3.1132	0.0299823	0.174837	Non-significant
CNPY2	OID20069	Q9Y2B0	Cardiometabolic	Timepoint	3.81223	1.27074	3	90.4294	3.11605	0.0300386	0.174963	Non-significant
KRT18	OID21296	P05783	Oncology	Timepoint:progression_status	17.183	5.72768	3	93.756	3.11102	0.0300435	0.174963	Non-significant
CMC1	OID30360	Q7Z7K0	Cardiometabolic_II	progression_status	0.371127	0.371127	1	132	4.80699	0.0300971	0.175159	Non-significant
CENPF	OID31329	P49454	Oncology_II	Timepoint:progression_status	3.0884	1.02947	3	98.191	3.1016	0.0301722	0.175329	Non-significant
FGFBP2	OID30395	Q9BYJ0	Cardiometabolic_II	progression_status	1.09672	1.09672	1	55.6141	4.94891	0.0301831	0.175329	Non-significant
CNTN3	OID21092	Q9P232	Neurology	Timepoint:progression_status	1.35574	0.451912	3	91.7277	3.11016	0.030186	0.175329	Non-significant
ACE2	OID20105	Q9BYF1	Cardiometabolic	Timepoint:progression_status	5.9192	1.97307	3	93.1369	3.10751	0.0302082	0.175343	Non-significant
GSTA3	OID21242	Q16772	Oncology	Timepoint:progression_status	16.6001	5.53336	3	101.354	3.09532	0.0302607	0.175532	Non-significant
PRDX2	OID30668	P32119	Inflammation_II	Timepoint	0.949091	0.316364	3	97.675	3.09783	0.0303397	0.175874	Non-significant
CXCL8	OID21430	P10145	Oncology	progression_status	3.41569	3.41569	1	60.3381	4.91208	0.0304509	0.176292	Non-significant
SPARC	OID21511	P09486	Oncology	progression_status	5.4508	5.4508	1	69.507	4.88099	0.0304517	0.176292	Non-significant
CWC15	OID31479	Q9P013	Oncology_II	progression_status	3.32971	3.32971	1	64.2144	4.89219	0.0305434	0.176707	Non-significant
CKAP4	OID20617	Q07065	Inflammation	Timepoint:progression_status	3.06616	1.02205	3	91.92	3.09894	0.0305986	0.17691	Non-significant
PREB	OID20439	Q9HCU5	Inflammation	Timepoint:progression_status	1.95918	0.65306	3	99.3662	3.0873	0.0306593	0.177145	Non-significant
COL28A1	OID30969	Q2UY09	Neurology_II	Timepoint	3.54755	1.18252	3	94.7508	3.09218	0.0307034	0.177283	Non-significant
CTSV	OID21405	O60911	Oncology	Timepoint	3.605	1.20167	3	93.4162	3.09338	0.0307287	0.177314	Non-significant
CLEC5A	OID20165	Q9NY25	Cardiometabolic	Timepoint	1.37045	0.456818	3	92.4734	3.09249	0.0308141	0.17769	Non-significant
LEPR	OID20128	P48357	Cardiometabolic	Timepoint	2.1523	0.717432	3	95.077	3.08572	0.0309344	0.178255	Non-significant
ANXA2	OID30263	P07355	Cardiometabolic_II	progression_status	2.32845	2.32845	1	61.3931	4.87533	0.0309882	0.178255	Non-significant
ST13	OID30624	P50502	Inflammation_II	Timepoint	2.42416	0.808052	3	96.0204	3.08206	0.0310267	0.178255	Non-significant
NOS3	OID20834	P29474	Neurology	Timepoint:progression_status	2.56682	0.855606	3	91.741	3.08798	0.0310282	0.178255	Non-significant
CDSN	OID20667	Q15517	Inflammation	Timepoint:progression_status	1.62681	0.542269	3	95.131	3.0832	0.0310288	0.178255	Non-significant
RICTOR	OID30433	Q6R327	Inflammation_II	Timepoint	1.56879	0.52293	3	99.1668	3.07784	0.0310335	0.178255	Non-significant
CETN3	OID31525	O15182	Oncology_II	Timepoint:progression_status	3.11176	1.03725	3	94.3057	3.08179	0.031127	0.178676	Non-significant
FADD	OID20151	Q13158	Cardiometabolic	Timepoint	6.28639	2.09546	3	103.249	3.06836	0.0312135	0.179056	Non-significant
PROCR	OID30149	Q9UNN8	Cardiometabolic_II	Timepoint:progression_status	4.93979	1.6466	3	132	3.04196	0.0312485	0.179141	Non-significant
SLC44A4	OID30897	Q53GD3	Neurology_II	progression_status	0.799786	0.799786	1	57.5858	4.87282	0.0312818	0.179215	Non-significant
CST7	OID20704	O76096	Inflammation	Timepoint	2.28162	0.760541	3	93.898	3.07727	0.0313247	0.179289	Non-significant
PMM2	OID30125	O15305	Cardiometabolic_II	progression_status	0.620444	0.620444	1	132	4.7339	0.0313542	0.179289	Non-significant
SMOC1	OID21461	Q9H4F8	Oncology	Timepoint	4.41628	1.47209	3	95.0186	3.07494	0.0313558	0.179289	Non-significant
KDR	OID21497	P35968	Oncology	Timepoint:progression_status	1.45281	0.484269	3	94.5614	3.07437	0.0314021	0.179409	Non-significant
TF	OID30783	P02787	Inflammation_II	progression_status	0.527553	0.527553	1	66.1496	4.83335	0.0314175	0.179409	Non-significant
PRAP1	OID30391	Q96NZ9	Cardiometabolic_II	Timepoint	1.56445	0.521482	3	92.3661	3.07606	0.0314559	0.179456	Non-significant
DMD	OID30223	P11532	Cardiometabolic_II	progression_status	0.885533	0.885533	1	62.031	4.84441	0.0314663	0.179456	Non-significant
INSL3	OID31129	P51460	Neurology_II	progression_status	3.18783	3.18783	1	48.0142	4.90436	0.0315689	0.179925	Non-significant
BLNK	OID30541	Q8WV28	Inflammation_II	progression_status	1.80684	1.80684	1	66.45	4.8188	0.0316488	0.180131	Non-significant
FKBPL	OID31499	Q9UIM3	Oncology_II	Timepoint	1.03767	0.34589	3	92.1852	3.07124	0.0316549	0.180131	Non-significant
IL1RAP	OID21126	Q9NPH3	Neurology	Timepoint	1.87125	0.623749	3	95.3727	3.06655	0.0316665	0.180131	Non-significant
EIF4EBP1	OID20162	Q13541	Cardiometabolic	Timepoint	17.1772	5.72574	3	96.8689	3.06122	0.0317998	0.180427	Non-significant
IL3RA	OID20461	P26951	Inflammation	Timepoint:progression_status	1.20505	0.401684	3	92.7499	3.06671	0.031802	0.180427	Non-significant
METAP2	OID21437	P50579	Oncology	Timepoint:progression_status	5.27784	1.75928	3	96.2964	3.06177	0.0318077	0.180427	Non-significant
PKLR	OID20682	P30613	Inflammation	Timepoint:progression_status	5.01827	1.67276	3	96.3473	3.06131	0.0318233	0.180427	Non-significant
MMP12	OID21439	P39900	Oncology	Timepoint:progression_status	4.80791	1.60264	3	93.1373	3.06531	0.0318359	0.180427	Non-significant
ARHGAP1	OID21202	Q07960	Oncology	progression_status	1.88863	1.88863	1	67.3336	4.80385	0.0318585	0.180427	Non-significant
GPR101	OID30819	Q96P66	Neurology_II	Timepoint:progression_status	1.14325	0.381082	3	132	3.02554	0.0319102	0.180427	Non-significant
P4HB	OID21509	P07237	Oncology	Timepoint:progression_status	2.08901	0.696335	3	95.4549	3.06018	0.0319146	0.180427	Non-significant
CFC1	OID21261	P0CG37	Oncology	Timepoint	4.43877	1.47959	3	96.7242	3.05837	0.0319205	0.180427	Non-significant
SELP	OID20379	P16109	Cardiometabolic	Timepoint:progression_status	1.61556	0.538519	3	92.704	3.06372	0.031923	0.180427	Non-significant
SULT1A1	OID21031	P50225	Neurology	Timepoint:progression_status	11.7431	3.91436	3	101.518	3.05143	0.0319632	0.180538	Non-significant
SLURP1	OID30404	P55000	Cardiometabolic_II	Timepoint	0.720346	0.240115	3	92.6753	3.06113	0.0320276	0.180786	Non-significant
SHBG	OID30685	P04278	Inflammation_II	Timepoint	2.86484	0.954946	3	94.8946	3.05597	0.0321122	0.181137	Non-significant
SERPINA9	OID21284	Q86WD7	Oncology	Timepoint:progression_status	7.0529	2.35097	3	94.1834	3.05596	0.0321508	0.181137	Non-significant
BPIFB2	OID30311	Q8N4F0	Cardiometabolic_II	Timepoint:progression_status	4.59286	1.53095	3	93.3948	3.05702	0.0321515	0.181137	Non-significant
CA9	OID21417	Q16790	Oncology	progression_status	2.99963	2.99963	1	61.9912	4.80109	0.0322091	0.181341	Non-significant
APOM	OID20374	O95445	Cardiometabolic	Timepoint	1.71974	0.573248	3	94.0539	3.05384	0.032243	0.181341	Non-significant
XG	OID20259	P55808	Cardiometabolic	progression_status	0.559117	0.559117	1	56.7438	4.81924	0.0322494	0.181341	Non-significant
TNFAIP2	OID31446	Q03169	Oncology_II	progression_status	1.09675	1.09675	1	68.0934	4.77587	0.0323048	0.181537	Non-significant
DHRS4L2	OID31072	Q6PKH6	Neurology_II	progression_status	0.676942	0.676942	1	70.3156	4.76028	0.032468	0.182201	Non-significant
IL34	OID20809	Q6ZMJ4	Neurology	Timepoint	7.53981	2.51327	3	132	3.01176	0.0324767	0.182201	Non-significant
LILRB5	OID20324	O75023	Cardiometabolic	Timepoint	1.14989	0.383296	3	93.6726	3.04835	0.032485	0.182201	Non-significant
TBL1X	OID21220	O60907	Oncology	Timepoint	9.52879	3.17626	3	97.4613	3.04202	0.0325405	0.182396	Non-significant
B4GALT1	OID20780	P15291	Inflammation	progression_status	1.90309	1.90309	1	61.2214	4.77514	0.0327099	0.183128	Non-significant
RGCC	OID31060	Q9H4X1	Neurology_II	progression_status	0.553956	0.553956	1	67.4822	4.7545	0.0327126	0.183128	Non-significant
CXCL8	OID20153	P10145	Cardiometabolic	progression_status	3.22063	3.22063	1	60.2621	4.77332	0.0328038	0.183522	Non-significant
HBZ	OID30307	P02008	Cardiometabolic_II	Timepoint:progression_status	1.91284	0.637613	3	91.1356	3.04294	0.0328486	0.183657	Non-significant
FRZB	OID20968	Q92765	Neurology	Timepoint	5.07972	1.69324	3	97.3922	3.03384	0.0328781	0.183705	Non-significant
CETN3	OID31525	O15182	Oncology_II	Timepoint	3.06654	1.02218	3	94.2778	3.03701	0.0329134	0.183723	Non-significant
CRTAC1	OID20279	Q9NQ79	Cardiometabolic	progression_status	0.979014	0.979014	1	60.3781	4.76613	0.0329231	0.183723	Non-significant
CSF2RB	OID30553	P32927	Inflammation_II	Timepoint:progression_status	1.76445	0.588149	3	92.7942	3.03678	0.033005	0.184064	Non-significant
HPCAL1	OID20615	P37235	Inflammation	Timepoint	7.99288	2.66429	3	96.4275	3.02845	0.0331506	0.184673	Non-significant
NECTIN2	OID20222	Q92692	Cardiometabolic	Timepoint	1.71516	0.571719	3	92.6931	3.03325	0.0331562	0.184673	Non-significant
ACHE	OID30585	P22303	Inflammation_II	Timepoint:progression_status	2.06182	0.687274	3	97.9656	3.02363	0.0332709	0.185195	Non-significant
CNST	OID20127	Q6PJW8	Cardiometabolic	Timepoint	1.36905	0.45635	3	97.7503	3.02142	0.0333737	0.185305	Non-significant
HIP1R	OID31141	O75146	Neurology_II	Timepoint:progression_status	10.9011	3.63369	3	93.7588	3.02565	0.0334108	0.185305	Non-significant
C1QTNF6	OID31049	Q9BXI9	Neurology_II	Timepoint:progression_status	3.7199	1.23997	3	98.5533	3.01954	0.0334112	0.185305	Non-significant
CXCL8	OID20631	P10145	Inflammation	progression_status	3.1625	3.1625	1	60.1648	4.73677	0.0334606	0.185305	Non-significant
FKBPL	OID31499	Q9UIM3	Oncology_II	Timepoint:progression_status	1.02257	0.340858	3	92.1983	3.02657	0.0334611	0.185305	Non-significant
SUSD5	OID30650	O60279	Inflammation_II	Timepoint	1.51023	0.503409	3	92.7283	3.02568	0.0334674	0.185305	Non-significant
EIF4B	OID21000	P23588	Neurology	Timepoint	13.8666	4.6222	3	99.9491	3.01635	0.033475	0.185305	Non-significant
TPPP2	OID31274	P59282	Oncology_II	Timepoint	3.52643	1.17548	3	93.9768	3.02377	0.0334769	0.185305	Non-significant
C1QBP	OID31007	Q07021	Neurology_II	Timepoint:progression_status	1.11546	0.371821	3	89.3038	3.03026	0.0334798	0.185305	Non-significant
CFHR4	OID30758	Q92496	Inflammation_II	Timepoint:progression_status	0.814774	0.271591	3	91.6295	3.02565	0.033532	0.185478	Non-significant
COX5B	OID21297	P10606	Oncology	progression_status	4.61473	4.61473	1	59.2319	4.73179	0.0336133	0.185811	Non-significant
SSC4D	OID20182	Q8WTU2	Cardiometabolic	progression_status	2.03199	2.03199	1	48.5948	4.77735	0.0336858	0.185986	Non-significant
CD40	OID20724	P25942	Inflammation	Timepoint	1.43245	0.477484	3	93.4594	3.01943	0.0336872	0.185986	Non-significant
FGL1	OID30702	Q08830	Inflammation_II	Timepoint	5.75118	1.91706	3	95.6968	3.01544	0.0337319	0.186117	Non-significant
DDA1	OID30126	Q9BW61	Cardiometabolic_II	Timepoint:progression_status	1.39401	0.464671	3	96.9714	3.01267	0.0337806	0.186269	Non-significant
RSPO3	OID21415	Q9BXY4	Oncology	Timepoint	4.01824	1.33941	3	95.5571	3.01171	0.0338968	0.186792	Non-significant
EEF1D	OID30335	P29692	Cardiometabolic_II	progression_status	6.00271	6.00271	1	66.3686	4.69025	0.0339321	0.186871	Non-significant
SERPINA4	OID30774	P29622	Inflammation_II	progression_status	0.538074	0.538074	1	59.6165	4.70863	0.0340076	0.187169	Non-significant
ACSL1	OID30080	P33121	Cardiometabolic_II	Timepoint:progression_status	1.06729	0.355764	3	92.3604	3.01088	0.0341102	0.187544	Non-significant
RRM2	OID21187	P31350	Oncology	Timepoint	13.5217	4.50725	3	94.0507	3.00843	0.0341183	0.187544	Non-significant
BANK1	OID20594	Q8NDB2	Inflammation	Timepoint	9.35624	3.11875	3	100.88	2.99836	0.0341915	0.187734	Non-significant
PSAPL1	OID31473	Q6NUJ1	Oncology_II	Timepoint	1.46854	0.489515	3	93.8797	3.00684	0.0341954	0.187734	Non-significant
SERPINB6	OID21023	P35237	Neurology	Timepoint	4.01017	1.33672	3	94.8456	3.00288	0.0343108	0.18825	Non-significant
KYNU	OID20669	Q16719	Inflammation	Timepoint:progression_status	9.18105	3.06035	3	97.0857	2.99854	0.0343758	0.18849	Non-significant
M6PR	OID30208	P20645	Cardiometabolic_II	Timepoint	0.256557	0.0855189	3	93.5684	3.00228	0.0344077	0.188547	Non-significant
CLSPN	OID20831	Q9HAW4	Neurology	Timepoint	2.75319	0.917729	3	85.0531	3.01416	0.0344306	0.188556	Non-significant
XIAP	OID30490	P98170	Inflammation_II	Timepoint:progression_status	2.31912	0.773039	3	99.3986	2.99277	0.0345048	0.188845	Non-significant
LTA4H	OID21452	P09960	Oncology	Timepoint	2.326	0.775334	3	95.6267	2.99633	0.0345488	0.188887	Non-significant
TBCA	OID30616	O75347	Inflammation_II	Timepoint	6.9415	2.31383	3	98.6499	2.99248	0.0345554	0.188887	Non-significant
TCP11	OID31267	Q8WWU5	Oncology_II	Timepoint:progression_status	1.23319	0.411063	3	97.2974	2.99273	0.0346147	0.189094	Non-significant
SEL1L	OID30196	Q9UBV2	Cardiometabolic_II	progression_status	0.433193	0.433193	1	56.1572	4.68792	0.0346395	0.189112	Non-significant
CCL23	OID20693	P55773	Inflammation	Timepoint:progression_status	2.66673	0.888911	3	95.5113	2.99014	0.0348227	0.189995	Non-significant
PSMG3	OID20549	Q9BT73	Inflammation	Timepoint:progression_status	4.5471	1.5157	3	96.9274	2.98773	0.0348513	0.190033	Non-significant
PDCD5	OID21021	O14737	Neurology	Timepoint	5.60444	1.86815	3	96.481	2.98518	0.0349863	0.190651	Non-significant
FABP3	OID30351	P05413	Cardiometabolic_II	progression_status	3.27208	3.27208	1	58.5937	4.65321	0.0351087	0.1912	Non-significant
SLIRP	OID31174	Q9GZT3	Oncology_II	Timepoint:progression_status	0.673181	0.224394	3	99.1114	2.97769	0.0351768	0.191347	Non-significant
SIL1	OID30207	Q9H173	Cardiometabolic_II	Timepoint:progression_status	0.79362	0.26454	3	96.72	2.98048	0.0351791	0.191347	Non-significant
CFD	OID30738	P00746	Inflammation_II	progression_status	0.198315	0.198315	1	54.5219	4.66326	0.0352307	0.19151	Non-significant
UXS1	OID21189	Q8NBZ7	Oncology	Timepoint	14.5188	4.83958	3	94.365	2.97993	0.0353327	0.191946	Non-significant
DSG4	OID21325	Q86SJ6	Oncology	Timepoint	3.27401	1.09134	3	95.069	2.97837	0.0353621	0.191987	Non-significant
ASPN	OID30315	Q9BXN1	Cardiometabolic_II	Timepoint:progression_status	1.47193	0.490644	3	94.8799	2.97735	0.0354175	0.192056	Non-significant
VSIG10L	OID30189	Q86VR7	Cardiometabolic_II	Timepoint	1.28482	0.428273	3	132	2.94382	0.0354183	0.192056	Non-significant
ACYP1	OID30642	P07311	Inflammation_II	Timepoint	2.66192	0.887305	3	96.4416	2.97423	0.0354693	0.192215	Non-significant
MFGE8	OID21134	Q08431	Neurology	Timepoint:progression_status	1.41941	0.473137	3	93.7667	2.97411	0.0356239	0.192933	Non-significant
EFNA4	OID20935	P52798	Neurology	Timepoint	2.43114	0.81038	3	93.6119	2.97315	0.0356751	0.192965	Non-significant
AHSG	OID30706	P02765	Inflammation_II	Timepoint	1.71512	0.571707	3	98.1406	2.96702	0.0356995	0.192965	Non-significant
RNASE10	OID30238	Q5GAN6	Cardiometabolic_II	Timepoint	2.46937	0.823125	3	92.5817	2.97366	0.0357123	0.192965	Non-significant
ITGB2	OID20315	P05107	Cardiometabolic	progression_status	0.736801	0.736801	1	59.5169	4.61728	0.0357296	0.192965	Non-significant
TPPP2	OID31274	P59282	Oncology_II	Timepoint:progression_status	3.46501	1.155	3	94.0017	2.9711	0.0357438	0.192965	Non-significant
ACRV1	OID30513	P26436	Inflammation_II	progression_status	1.49795	1.49795	1	57.6565	4.62257	0.0357611	0.192965	Non-significant
SCG3	OID20728	Q8WXD2	Inflammation	Timepoint	2.78914	0.929712	3	94.2649	2.96887	0.0358286	0.193211	Non-significant
KLKB1	OID30760	P03952	Inflammation_II	progression_status	0.322305	0.322305	1	60.6241	4.6051	0.0358896	0.193422	Non-significant
UNG	OID31419	P13051	Oncology_II	progression_status	1.54681	1.54681	1	67.8143	4.58167	0.0359149	0.19344	Non-significant
SPOCK1	OID20924	Q08629	Neurology	progression_status	0.961623	0.961623	1	61.4628	4.59135	0.0361017	0.194221	Non-significant
CPOX	OID30495	P36551	Inflammation_II	Timepoint	1.4035	0.467833	3	95.4221	2.96127	0.0361038	0.194221	Non-significant
MUC2	OID30377	Q02817	Cardiometabolic_II	progression_status	2.39773	2.39773	1	49.4053	4.63763	0.0361844	0.194403	Non-significant
KRT19	OID20596	P08727	Inflammation	progression_status	7.50156	7.50156	1	56.4517	4.60519	0.0361884	0.194403	Non-significant
IL13	OID20430	P35225	Inflammation	progression_status	16.6616	16.6616	1	132	4.4774	0.0362238	0.194403	Non-significant
PDGFA	OID20313	P04085	Cardiometabolic	Timepoint	5.0351	1.67837	3	92.976	2.96142	0.0362369	0.194403	Non-significant
OXT	OID21047	P01178	Neurology	Timepoint:progression_status	5.71286	1.90429	3	92.1946	2.9622	0.036248	0.194403	Non-significant
F7	OID20372	P08709	Cardiometabolic	Timepoint	1.78058	0.593526	3	94.9589	2.95798	0.0362781	0.194446	Non-significant
AKT1S1	OID20895	Q96B36	Neurology	Timepoint:progression_status	9.67789	3.22596	3	99.1485	2.94839	0.0364874	0.195422	Non-significant
RCOR1	OID20073	Q9UKL0	Cardiometabolic	Timepoint:progression_status	15.1586	5.05288	3	93.8023	2.95444	0.0365045	0.195422	Non-significant
SOD2	OID21114	P04179	Neurology	Timepoint	6.19352	2.06451	3	94.8279	2.95191	0.0365608	0.195605	Non-significant
SPP1	OID20322	P10451	Cardiometabolic	progression_status	6.6445	6.6445	1	61.4483	4.55879	0.0367452	0.196472	Non-significant
FABP5	OID21043	Q01469	Neurology	progression_status	4.93065	4.93065	1	62.6134	4.54711	0.0369032	0.197056	Non-significant
SMNDC1	OID31471	O75940	Oncology_II	Timepoint	10.8716	3.62387	3	96.5318	2.94194	0.0369225	0.197056	Non-significant
METAP2	OID21437	P50579	Oncology	Timepoint	5.07172	1.69057	3	96.2634	2.94219	0.0369259	0.197056	Non-significant
TXNRD1	OID21135	Q16881	Neurology	Timepoint:progression_status	1.69762	0.565875	3	95.1903	2.9431	0.0369438	0.197056	Non-significant
TMED1	OID31278	Q13445	Oncology_II	Timepoint:progression_status	1.65057	0.550188	3	102.591	2.93389	0.0369811	0.197084	Non-significant
DNM1	OID31458	Q05193	Oncology_II	progression_status	0.884735	0.884735	1	60.2044	4.55053	0.0369938	0.197084	Non-significant
PON1	OID30704	P27169	Inflammation_II	Timepoint	1.27844	0.426146	3	92.8166	2.94278	0.0370961	0.197456	Non-significant
LYN	OID21350	P07948	Oncology	Timepoint:progression_status	7.39658	2.46553	3	96.8096	2.93724	0.0371245	0.197456	Non-significant
XG	OID20259	P55808	Cardiometabolic	Timepoint:progression_status	1.02362	0.341206	3	93.6359	2.94098	0.0371307	0.197456	Non-significant
CST7	OID20704	O76096	Inflammation	Timepoint:progression_status	2.17892	0.726306	3	93.9169	2.93875	0.0372179	0.1978	Non-significant
APP	OID21070	P05067	Neurology	progression_status	0.861626	0.861626	1	64.0675	4.52182	0.037323	0.198239	Non-significant
PLXDC1	OID21258	Q8IUK5	Oncology	progression_status	1.03901	1.03901	1	59.4038	4.53565	0.0373489	0.198257	Non-significant
ANGPTL3	OID20407	Q9Y5C1	Cardiometabolic	Timepoint:progression_status	1.71065	0.570217	3	96.6027	2.9316	0.0373979	0.198398	Non-significant
TNFRSF6B	OID20964	O95407	Neurology	progression_status	1.94334	1.94334	1	56.4003	4.53527	0.0375808	0.199081	Non-significant
TP53BP1	OID30470	Q12888	Inflammation_II	Timepoint:progression_status	1.97062	0.656874	3	93.5945	2.93086	0.0376039	0.199081	Non-significant
HSPB6	OID21408	O14558	Oncology	progression_status	2.16106	2.16106	1	59.1116	4.52325	0.0376215	0.199081	Non-significant
ABL1	OID21280	P00519	Oncology	Timepoint	3.21933	1.07311	3	95.2274	2.92797	0.0376447	0.199081	Non-significant
PTPRF	OID20310	P10586	Cardiometabolic	Timepoint	2.28882	0.76294	3	93.8848	2.9292	0.0376647	0.199081	Non-significant
KLK10	OID21523	O43240	Oncology	Timepoint:progression_status	2.57406	0.858019	3	89.6241	2.93444	0.0376804	0.199081	Non-significant
FAM13A	OID31463	O94988	Oncology_II	Timepoint:progression_status	4.03615	1.34538	3	95.4827	2.92681	0.0376848	0.199081	Non-significant
TNFRSF11A	OID20646	Q9Y6Q6	Inflammation	progression_status	1.09266	1.09266	1	53.0611	4.53432	0.0378793	0.199989	Non-significant
PAMR1	OID21153	Q6UXH9	Neurology	Timepoint	1.49359	0.497864	3	95.1342	2.92251	0.0379071	0.200016	Non-significant
NSFL1C	OID21022	Q9UNZ2	Neurology	Timepoint	5.077	1.69233	3	97.9383	2.91848	0.0379424	0.200054	Non-significant
CRH	OID21257	P06850	Oncology	Timepoint	11.2327	3.74424	3	94.0161	2.92277	0.0379596	0.200054	Non-significant
CHAD	OID30660	O15335	Inflammation_II	Timepoint	3.02214	1.00738	3	91.6732	2.92446	0.0380205	0.200226	Non-significant
EPHA2	OID21342	P29317	Oncology	progression_status	0.972571	0.972571	1	48.8189	4.54642	0.0380441	0.200226	Non-significant
MRPL24	OID30178	Q96A35	Cardiometabolic_II	Timepoint:progression_status	1.41234	0.470781	3	101.418	2.91217	0.0380604	0.200226	Non-significant
RICTOR	OID30433	Q6R327	Inflammation_II	Timepoint:progression_status	1.48489	0.494965	3	99.2008	2.91325	0.0381234	0.200438	Non-significant
TGFB2	OID31417	P61812	Oncology_II	Timepoint:progression_status	2.57322	0.857739	3	98.2283	2.91057	0.0383031	0.20124	Non-significant
IL18R1	OID20652	Q13478	Inflammation	Timepoint	1.52024	0.506748	3	92.1117	2.91742	0.0383277	0.20124	Non-significant
FGFBP2	OID30395	Q9BYJ0	Cardiometabolic_II	Timepoint	1.9384	0.646135	3	92.8787	2.91566	0.0383647	0.20124	Non-significant
ALDH5A1	OID31047	P51649	Neurology_II	Timepoint:progression_status	8.33637	2.77879	3	95.4429	2.91246	0.0383674	0.20124	Non-significant
PGLYRP2	OID30742	Q96PD5	Inflammation_II	Timepoint	0.845309	0.28177	3	92.3181	2.91577	0.0383936	0.201258	Non-significant
XRCC4	OID20869	Q13426	Neurology	progression_status	1.3012	1.3012	1	64.1138	4.46569	0.0384797	0.20159	Non-significant
FLT1	OID21301	P17948	Oncology	Timepoint:progression_status	0.731073	0.243691	3	92.8173	2.90883	0.0386957	0.202601	Non-significant
TRIM24	OID31271	O15164	Oncology_II	progression_status	1.27388	1.27388	1	60.1333	4.46448	0.0387662	0.20285	Non-significant
DNAJC6	OID30247	O75061	Cardiometabolic_II	Timepoint:progression_status	3.5995	1.19983	3	92.6404	2.90601	0.0388426	0.203052	Non-significant
INSL3	OID31129	P51460	Neurology_II	Timepoint	5.67064	1.89021	3	90.7865	2.90803	0.0388602	0.203052	Non-significant
PCBD1	OID30610	P61457	Inflammation_II	Timepoint:progression_status	7.24159	2.41386	3	97.5307	2.89807	0.038944	0.203052	Non-significant
AMBN	OID20437	Q9NP70	Inflammation	Timepoint	0.749318	0.249773	3	93.6262	2.90236	0.0389596	0.203052	Non-significant
DNAJC6	OID30247	O75061	Cardiometabolic_II	progression_status	1.846	1.846	1	55.6566	4.47101	0.0389673	0.203052	Non-significant
PARP1	OID20500	P09874	Inflammation	progression_status	6.47803	6.47803	1	62.5044	4.44687	0.038979	0.203052	Non-significant
SMOC1	OID21461	Q9H4F8	Oncology	Timepoint:progression_status	4.16522	1.38841	3	95.0443	2.90013	0.0389844	0.203052	Non-significant
GATD3	OID30253	P0DPI2	Cardiometabolic_II	Timepoint	12.734	4.24466	3	97.8251	2.89682	0.038989	0.203052	Non-significant
ADAMTSL4	OID30275	Q6UY14	Cardiometabolic_II	Timepoint:progression_status	2.22016	0.740054	3	95.6506	2.89642	0.03913	0.203579	Non-significant
FGF9	OID31193	P31371	Oncology_II	progression_status	4.26893	4.26893	1	132	4.34089	0.0391365	0.203579	Non-significant
ADAMTSL4	OID30275	Q6UY14	Cardiometabolic_II	progression_status	1.13272	1.13272	1	63.4594	4.43323	0.0392089	0.203687	Non-significant
PTGES2	OID30561	Q9H7Z7	Inflammation_II	Timepoint:progression_status	2.44592	0.815308	3	95.6458	2.89456	0.0392214	0.203687	Non-significant
MCTS1	OID31444	Q9ULC4	Oncology_II	progression_status	0.0835835	0.0835835	1	64.6423	4.42899	0.0392265	0.203687	Non-significant
ULBP2	OID20919	Q9BZM5	Neurology	Timepoint:progression_status	1.99685	0.665616	3	91.7785	2.8984	0.039265	0.203767	Non-significant
REXO2	OID30075	Q9Y3B8	Cardiometabolic_II	progression_status	0.22881	0.22881	1	69.6913	4.40932	0.039365	0.204165	Non-significant
GYS1	OID20097	P13807	Cardiometabolic	Timepoint	14.4739	4.82463	3	102.672	2.88212	0.0394566	0.20452	Non-significant
PRC1	OID31345	O43663	Oncology_II	progression_status	0.503903	0.503903	1	53.2917	4.4543	0.0395232	0.204745	Non-significant
CFH	OID30790	P08603	Inflammation_II	Timepoint	1.32416	0.441388	3	95.8636	2.88724	0.0395683	0.204858	Non-significant
TRIM5	OID20526	Q9C035	Inflammation	progression_status	1.8655	1.8655	1	70.0587	4.39615	0.039632	0.205068	Non-significant
MTR	OID30110	Q99707	Cardiometabolic_II	Timepoint	2.96702	0.989007	3	96.253	2.88456	0.0396783	0.205116	Non-significant
EGFR	OID20319	P00533	Cardiometabolic	Timepoint	1.1788	0.392934	3	96.7345	2.88382	0.0396878	0.205116	Non-significant
PLA2G4A	OID20685	P47712	Inflammation	Timepoint:progression_status	2.61796	0.872655	3	94.7213	2.88426	0.039782	0.20538	Non-significant
PLA2G7	OID21105	Q13093	Neurology	Timepoint:progression_status	0.910014	0.303338	3	92.2164	2.8871	0.0397928	0.20538	Non-significant
CRTAC1	OID20279	Q9NQ79	Cardiometabolic	Timepoint	1.77657	0.592191	3	95.3604	2.88296	0.0398089	0.20538	Non-significant
CLSTN2	OID20664	Q9H4D0	Inflammation	Timepoint	2.17413	0.724711	3	94.0005	2.88226	0.0399241	0.205854	Non-significant
KRT17	OID30092	Q04695	Cardiometabolic_II	progression_status	0.442668	0.442668	1	132	4.3034	0.0399791	0.205967	Non-significant
DNPEP	OID31118	Q9ULA0	Neurology_II	Timepoint:progression_status	5.59051	1.8635	3	94.3347	2.88025	0.0400039	0.205967	Non-significant
PRAME	OID31165	P78395	Oncology_II	Timepoint	1.42565	0.475216	3	105.328	2.86829	0.040016	0.205967	Non-significant
PGLYRP1	OID20338	O75594	Cardiometabolic	Timepoint:progression_status	1.56844	0.522814	3	92.7937	2.88128	0.0400457	0.205999	Non-significant
LMOD1	OID31416	P29536	Oncology_II	progression_status	1.21729	1.21729	1	58.6487	4.40579	0.0401317	0.206321	Non-significant
BLOC1S3	OID31106	Q6QNY0	Neurology_II	Timepoint	0.714377	0.238126	3	132	2.84404	0.0402244	0.206678	Non-significant
PSMG4	OID30514	Q5JS54	Inflammation_II	Timepoint	2.16686	0.722288	3	94.9422	2.87418	0.0402719	0.206767	Non-significant
DCTN1	OID21399	Q14203	Oncology	Timepoint	2.1989	0.732967	3	94.8043	2.87386	0.0402958	0.206767	Non-significant
MYL6B	OID30936	P14649	Neurology_II	Timepoint:progression_status	3.5544	1.1848	3	98.1551	2.86949	0.0403242	0.206767	Non-significant
DCUN1D1	OID30830	Q96GG9	Neurology_II	Timepoint:progression_status	2.00286	0.667619	3	97.2787	2.87023	0.0403357	0.206767	Non-significant
HS6ST1	OID21441	O60243	Oncology	Timepoint	4.83545	1.61182	3	97.9413	2.86835	0.0403936	0.206944	Non-significant
ADGRD1	OID30588	Q6QNK2	Inflammation_II	progression_status	0.780336	0.780336	1	54.8929	4.40504	0.0404468	0.207096	Non-significant
GORASP2	OID31438	Q9H8Y8	Oncology_II	Timepoint	0.804939	0.268313	3	97.4457	2.86634	0.0405226	0.207364	Non-significant
QDPR	OID20174	P09417	Cardiometabolic	Timepoint:progression_status	3.24004	1.08001	3	98.5364	2.86345	0.0406088	0.207685	Non-significant
COL28A1	OID30969	Q2UY09	Neurology_II	Timepoint:progression_status	3.28944	1.09648	3	94.7702	2.8672	0.0406335	0.20769	Non-significant
FAP	OID20330	Q12884	Cardiometabolic	Timepoint:progression_status	1.03775	0.345916	3	93.6367	2.86765	0.0406787	0.207801	Non-significant
L1CAM	OID21484	P32004	Oncology	Timepoint:progression_status	1.33664	0.445545	3	91.8272	2.86804	0.0407709	0.208151	Non-significant
BAG4	OID30474	O95429	Inflammation_II	Timepoint	1.29782	0.432607	3	97.8108	2.86032	0.040808	0.208188	Non-significant
SIRT1	OID30439	Q96EB6	Inflammation_II	progression_status	0.730284	0.730284	1	69.3096	4.34408	0.0408254	0.208188	Non-significant
GRN	OID21159	P28799	Neurology	Timepoint	1.71456	0.571519	3	96.3549	2.86009	0.0409022	0.208459	Non-significant
SMPDL3A	OID20676	Q92484	Inflammation	Timepoint:progression_status	2.09097	0.696989	3	93.1429	2.86173	0.0410096	0.208828	Non-significant
PCDH1	OID20614	Q08174	Inflammation	Timepoint	0.459868	0.153289	3	93.7562	2.86041	0.0410398	0.208828	Non-significant
STEAP4	OID30846	Q687X5	Neurology_II	progression_status	0.986236	0.986236	1	46.1455	4.418	0.041049	0.208828	Non-significant
QPCT	OID20320	Q16769	Cardiometabolic	Timepoint	1.05183	0.350611	3	91.9709	2.862	0.0410693	0.208828	Non-significant
CD38	OID21316	P28907	Oncology	Timepoint	1.91	0.636666	3	94.5325	2.85793	0.0411194	0.208963	Non-significant
IDO1	OID30563	P14902	Inflammation_II	Timepoint	6.58673	2.19558	3	97.9664	2.85063	0.0412964	0.209577	Non-significant
TJAP1	OID21477	Q5JTD0	Oncology	Timepoint	2.68747	0.895822	3	98.9549	2.84939	0.0413055	0.209577	Non-significant
ENTPD6	OID20100	O75354	Cardiometabolic	Timepoint	1.78672	0.595574	3	99.4201	2.84878	0.0413117	0.209577	Non-significant
LAIR2	OID20965	Q6ISS4	Neurology	Timepoint	1.50856	0.502854	3	91.2327	2.85764	0.0413391	0.209595	Non-significant
RET	OID21346	P07949	Oncology	progression_status	1.48788	1.48788	1	59.1626	4.34858	0.041363	0.209596	Non-significant
PDIA4	OID30375	P13667	Cardiometabolic_II	progression_status	1.86962	1.86962	1	66.3822	4.31643	0.0416177	0.210536	Non-significant
LETM1	OID31018	O95202	Neurology_II	Timepoint:progression_status	7.87294	2.62431	3	94.9713	2.84773	0.0416191	0.210536	Non-significant
IL22	OID31407	Q9GZX6	Oncology_II	progression_status	2.19107	2.19107	1	58.9598	4.33788	0.0416202	0.210536	Non-significant
TIMM8A	OID31143	O60220	Neurology_II	Timepoint	7.48268	2.49423	3	96.6837	2.84519	0.0416504	0.210569	Non-significant
STX8	OID20531	Q9UNK0	Inflammation	Timepoint:progression_status	5.2439	1.74797	3	95.1563	2.84537	0.0417306	0.210853	Non-significant
MRPS16	OID30489	Q9Y3D3	Inflammation_II	Timepoint:progression_status	0.54939	0.18313	3	104.337	2.83409	0.0418212	0.21119	Non-significant
TIMM10	OID30358	P62072	Cardiometabolic_II	progression_status	0.272665	0.272665	1	66.4404	4.30505	0.0418758	0.211345	Non-significant
CAMSAP1	OID31070	Q5T5Y3	Neurology_II	Timepoint	11.541	3.84699	3	102.332	2.83433	0.0419097	0.211361	Non-significant
TOP2B	OID30559	Q02880	Inflammation_II	Timepoint	10.3265	3.44217	3	96.6739	2.8399	0.0419269	0.211361	Non-significant
CWC15	OID31479	Q9P013	Oncology_II	Timepoint:progression_status	5.7953	1.93177	3	95.5516	2.83826	0.0420785	0.212003	Non-significant
SIGLEC5	OID21082	O15389	Neurology	Timepoint	7.22878	2.40959	3	90.3941	2.84057	0.0422797	0.212612	Non-significant
DPP4	OID20406	P27487	Cardiometabolic	Timepoint:progression_status	1.44413	0.481377	3	93.7628	2.83639	0.0422848	0.212612	Non-significant
GPR15L	OID31511	Q6UWK7	Oncology_II	Timepoint	4.62527	1.54176	3	94.2009	2.8354	0.0423098	0.212612	Non-significant
SNRPB2	OID31132	P08579	Neurology_II	progression_status	6.33158	6.33158	1	62.6313	4.29632	0.042316	0.212612	Non-significant
NUDC	OID20623	Q9Y266	Inflammation	Timepoint	3.75366	1.25122	3	93.1922	2.83626	0.0423267	0.212612	Non-significant
DCUN1D2	OID31231	Q6PH85	Oncology_II	Timepoint:progression_status	4.63608	1.54536	3	103.737	2.82475	0.042344	0.212612	Non-significant
TPR	OID30143	P12270	Cardiometabolic_II	progression_status	3.19123	3.19123	1	58.6398	4.30199	0.0424676	0.213112	Non-significant
PCYT2	OID31519	Q99447	Oncology_II	Timepoint:progression_status	7.12916	2.37639	3	99.6567	2.82522	0.0425335	0.213321	Non-significant
SSBP1	OID30468	Q04837	Inflammation_II	progression_status	0.535841	0.535841	1	132	4.19085	0.0426269	0.213569	Non-significant
IL1B	OID20427	P01584	Inflammation	progression_status	12.3321	12.3321	1	71.2169	4.2614	0.0426314	0.213569	Non-significant
GHR	OID30574	P10912	Inflammation_II	Timepoint	0.937076	0.312359	3	93.3666	2.82766	0.0427711	0.214147	Non-significant
CTHRC1	OID30393	Q96CG8	Cardiometabolic_II	Timepoint	1.8188	0.606266	3	94.8068	2.8243	0.0428617	0.214277	Non-significant
PTX3	OID20570	P26022	Inflammation	progression_status	1.35741	1.35741	1	64.3788	4.26779	0.0428709	0.214277	Non-significant
ARF6	OID31523	P62330	Oncology_II	Timepoint:progression_status	5.36213	1.78738	3	98.1612	2.81954	0.0429198	0.214277	Non-significant
SHISA5	OID30387	Q8N114	Cardiometabolic_II	progression_status	0.531011	0.531011	1	55.8632	4.29201	0.0429212	0.214277	Non-significant
USP25	OID31428	Q9UHP3	Oncology_II	progression_status	1.10578	1.10578	1	63.2233	4.2687	0.0429236	0.214277	Non-significant
PMCH	OID30172	P20382	Cardiometabolic_II	Timepoint	0.606789	0.202263	3	92.2273	2.82579	0.0429429	0.214277	Non-significant
CDC42BPB	OID31485	Q9Y5S2	Oncology_II	Timepoint	0.762589	0.254196	3	132	2.79077	0.0430496	0.214688	Non-significant
PDE1C	OID31201	Q14123	Oncology_II	Timepoint	1.10979	0.36993	3	98.3405	2.81484	0.0431628	0.215131	Non-significant
DKK4	OID20934	Q9UBT3	Neurology	progression_status	1.56868	1.56868	1	52.8358	4.28958	0.0432462	0.215425	Non-significant
SEC31A	OID30269	O94979	Cardiometabolic_II	Timepoint	2.61766	0.872554	3	95.4747	2.8136	0.0433964	0.216051	Non-significant
MYOM2	OID30131	P54296	Cardiometabolic_II	progression_status	0.835014	0.835014	1	66.9538	4.23807	0.0434211	0.216052	Non-significant
TALDO1	OID30414	P37837	Cardiometabolic_II	Timepoint	3.50745	1.16915	3	94.5785	2.8134	0.0434615	0.216131	Non-significant
NPTX1	OID21074	Q15818	Neurology	Timepoint	1.69669	0.565563	3	92.8061	2.81355	0.0435638	0.216506	Non-significant
VTA1	OID21016	Q9NP79	Neurology	Timepoint	4.00998	1.33666	3	101.845	2.8035	0.0435861	0.216506	Non-significant
NPPC	OID20568	P23582	Inflammation	Timepoint:progression_status	10.5784	3.52614	3	95.8198	2.80708	0.0437298	0.217098	Non-significant
EIF4G1	OID20625	Q04637	Inflammation	Timepoint	10.6225	3.54082	3	94.1674	2.80757	0.0438034	0.217341	Non-significant
CDCP1	OID20940	Q9H5V8	Neurology	Timepoint:progression_status	1.97242	0.657474	3	91.4462	2.80928	0.0438836	0.217616	Non-significant
RBP2	OID21365	P50120	Oncology	Timepoint	9.16237	3.05412	3	100.16	2.79847	0.0439528	0.217837	Non-significant
LTO1	OID20434	Q8WV07	Inflammation	Timepoint	4.61968	1.53989	3	92.2021	2.80541	0.0440458	0.218175	Non-significant
PRCP	OID20337	P42785	Cardiometabolic	Timepoint:progression_status	1.36823	0.456078	3	93.4544	2.80197	0.0441548	0.218592	Non-significant
ENO1	OID21037	P06733	Neurology	Timepoint	15.0066	5.00221	3	96.7145	2.79686	0.0442373	0.218878	Non-significant
SWAP70	OID31477	Q9UH65	Oncology_II	Timepoint	2.10078	0.700261	3	93.9604	2.7982	0.0443303	0.219215	Non-significant
B4GALT1	OID20780	P15291	Inflammation	Timepoint	3.344	1.11467	3	94.5757	2.79685	0.0443665	0.219271	Non-significant
EPO	OID20522	P01588	Inflammation	progression_status	5.85437	5.85437	1	55.7056	4.22576	0.0445135	0.21985	Non-significant
MBL2	OID30759	P11226	Inflammation_II	Timepoint	1.79224	0.597413	3	91.0387	2.79786	0.0445377	0.21985	Non-significant
CPQ	OID30406	Q9Y646	Cardiometabolic_II	Timepoint	1.59232	0.530772	3	95.2582	2.79238	0.0445728	0.21985	Non-significant
VPS37A	OID21355	Q8NEZ2	Oncology	progression_status	1.24281	1.24281	1	55.3131	4.22426	0.0445835	0.21985	Non-significant
KRT5	OID20860	P13647	Neurology	progression_status	4.28901	4.28901	1	65.8808	4.19054	0.0446423	0.220017	Non-significant
CCL27	OID20121	Q9Y4X3	Cardiometabolic	progression_status	1.6404	1.6404	1	60.1919	4.20161	0.0447497	0.220364	Non-significant
ITGA11	OID20581	Q9UKX5	Inflammation	Timepoint:progression_status	1.68602	0.562006	3	94.5043	2.78979	0.0447627	0.220364	Non-significant
CD14	OID20378	P08571	Cardiometabolic	Timepoint	24.8467	8.28223	3	98.1201	2.78506	0.0448111	0.220479	Non-significant
UROD	OID30603	P06132	Inflammation_II	Timepoint:progression_status	2.51879	0.839597	3	93.4037	2.78926	0.0448615	0.220604	Non-significant
TXNL1	OID30872	O43396	Neurology_II	Timepoint	2.28496	0.761652	3	97.1384	2.78277	0.0449967	0.221068	Non-significant
EPHX2	OID20119	P34913	Cardiometabolic	Timepoint	6.28106	2.09369	3	92.6028	2.78759	0.0450059	0.221068	Non-significant
STC1	OID21014	P52823	Neurology	Timepoint:progression_status	6.41279	2.1376	3	92.5735	2.78525	0.0451392	0.221599	Non-significant
ANGPT2	OID21463	O15123	Oncology	Timepoint	2.0094	0.669799	3	93.4742	2.78226	0.0452492	0.222016	Non-significant
LMOD1	OID30547	P29536	Inflammation_II	progression_status	1.87455	1.87455	1	63.1451	4.16612	0.0454248	0.222645	Non-significant
RICTOR	OID30433	Q6R327	Inflammation_II	progression_status	0.705263	0.705263	1	69.3341	4.15102	0.0454281	0.222645	Non-significant
CSF3R	OID30527	Q99062	Inflammation_II	Timepoint	1.04213	0.347376	3	95.6741	2.77508	0.0455183	0.222964	Non-significant
ARHGEF12	OID20554	Q9NZN5	Inflammation	Timepoint:progression_status	2.7074	0.902466	3	101.156	2.76875	0.0455621	0.223055	Non-significant
TNFRSF12A	OID21482	Q9NP84	Oncology	progression_status	1.11912	1.11912	1	60.5081	4.16072	0.0457446	0.223645	Non-significant
CXCL8	OID20997	P10145	Neurology	progression_status	3.10845	3.10845	1	61.5957	4.15718	0.0457558	0.223645	Non-significant
LMNB2	OID31109	Q03252	Neurology_II	Timepoint:progression_status	4.94461	1.6482	3	93.9596	2.77257	0.0457675	0.223645	Non-significant
CD34	OID21025	P28906	Neurology	progression_status	0.81704	0.81704	1	58.395	4.16548	0.0457842	0.223645	Non-significant
MTR	OID30110	Q99707	Cardiometabolic_II	progression_status	1.42111	1.42111	1	64.7337	4.14483	0.0458583	0.223883	Non-significant
ALDH3A1	OID20512	P30838	Inflammation	Timepoint:progression_status	4.0545	1.3515	3	94.2066	2.76829	0.0459963	0.224432	Non-significant
MET	OID20269	P08581	Cardiometabolic	Timepoint	1.02752	0.342507	3	96.2829	2.76521	0.0460447	0.224544	Non-significant
DSCAM	OID30993	O60469	Neurology_II	Timepoint:progression_status	1.17238	0.390792	3	92.6922	2.76655	0.0461931	0.225143	Non-significant
MVK	OID20459	Q03426	Inflammation	Timepoint:progression_status	15.0708	5.02361	3	100.984	2.75593	0.0463089	0.225583	Non-significant
GLYR1	OID31364	Q49A26	Oncology_II	Timepoint	2.63261	0.877536	3	92.6668	2.7623	0.0464395	0.226094	Non-significant
GLOD4	OID20710	Q9HC38	Inflammation	Timepoint	2.6284	0.876132	3	98.275	2.75416	0.0465652	0.226581	Non-significant
ITGAM	OID21071	P11215	Neurology	progression_status	0.811909	0.811909	1	59.6223	4.12479	0.0467254	0.227236	Non-significant
MATN3	OID20979	O15232	Neurology	progression_status	1.36386	1.36386	1	62.7303	4.11429	0.0467733	0.227334	Non-significant
CTRC	OID20752	Q99895	Inflammation	progression_status	2.97369	2.97369	1	60.4693	4.11844	0.0468261	0.227334	Non-significant
CRIP2	OID20901	P52943	Neurology	Timepoint:progression_status	1.22535	0.408449	3	94.9489	2.75274	0.0468483	0.227334	Non-significant
MARS1	OID30658	P56192	Inflammation_II	Timepoint:progression_status	2.91333	0.971109	3	96.0382	2.75158	0.0468489	0.227334	Non-significant
SERPINA9	OID21284	Q86WD7	Oncology	progression_status	3.16671	3.16671	1	60.0782	4.11633	0.0469096	0.227504	Non-significant
CNTN5	OID21006	O94779	Neurology	Timepoint:progression_status	1.21573	0.405244	3	94.1529	2.75088	0.0470075	0.227768	Non-significant
COX6B1	OID30317	P14854	Cardiometabolic_II	progression_status	0.352793	0.352793	1	65.9701	4.09591	0.0470407	0.227768	Non-significant
MPHOSPH8	OID20092	Q99549	Cardiometabolic	Timepoint:progression_status	5.82948	1.94316	3	94.2899	2.75015	0.0470415	0.227768	Non-significant
VSTM1	OID20851	Q6UX27	Neurology	Timepoint	3.60193	1.20064	3	93.4032	2.74981	0.047118	0.228013	Non-significant
HEXIM1	OID20589	O94992	Inflammation	Timepoint:progression_status	6.10987	2.03662	3	95.3448	2.74467	0.0472969	0.228753	Non-significant
ASS1	OID30170	P00966	Cardiometabolic_II	progression_status	3.34409	3.34409	1	66.2973	4.0827	0.047367	0.228904	Non-significant
LRRC59	OID30361	Q96AG4	Cardiometabolic_II	Timepoint	0.847589	0.28253	3	99.3754	2.73919	0.04738	0.228904	Non-significant
FSTL3	OID20782	O95633	Inflammation	progression_status	1.27572	1.27572	1	57.9409	4.09876	0.0475322	0.229513	Non-significant
CDKN1A	OID21319	P38936	Oncology	progression_status	5.32336	5.32336	1	62.5813	4.08153	0.0476396	0.22972	Non-significant
SRPK2	OID20502	P78362	Inflammation	Timepoint:progression_status	1.69356	0.56452	3	99.1036	2.73444	0.0476774	0.22972	Non-significant
ROR1	OID20224	Q01973	Cardiometabolic	Timepoint	1.8012	0.600401	3	94.7982	2.73876	0.0476806	0.22972	Non-significant
GNE	OID21231	Q9Y223	Oncology	progression_status	1.60702	1.60702	1	62.8266	4.07904	0.0476887	0.22972	Non-significant
ADAMTS8	OID21502	Q9UP79	Oncology	progression_status	0.863308	0.863308	1	55.231	4.10088	0.0477053	0.22972	Non-significant
ZFYVE19	OID31452	Q96K21	Oncology_II	Timepoint	3.16905	1.05635	3	96.1696	2.73559	0.0477842	0.229974	Non-significant
FGF21	OID21402	Q9NSA1	Oncology	progression_status	8.70147	8.70147	1	62.837	4.07313	0.0478444	0.229999	Non-significant
FOSB	OID20791	P53539	Neurology	progression_status	1.75238	1.75238	1	67.8774	4.06104	0.0478459	0.229999	Non-significant
DPP7	OID20142	Q9UHL4	Cardiometabolic	Timepoint:progression_status	1.70213	0.567377	3	91.8687	2.73883	0.0478675	0.229999	Non-significant
GOT1	OID30417	P17174	Cardiometabolic_II	Timepoint	5.61167	1.87056	3	96.7805	2.73265	0.047922	0.230135	Non-significant
BCAT1	OID30312	P54687	Cardiometabolic_II	Timepoint:progression_status	1.46508	0.488358	3	93.3734	2.73514	0.0479879	0.230326	Non-significant
TXLNA	OID20952	P40222	Neurology	Timepoint:progression_status	5.8264	1.94213	3	94.9362	2.73123	0.048121	0.230553	Non-significant
EDF1	OID31010	O60869	Neurology_II	Timepoint:progression_status	7.08766	2.36255	3	99.5113	2.72651	0.0481288	0.230553	Non-significant
CABP2	OID30916	Q9NPB3	Neurology_II	Timepoint	3.72692	1.24231	3	101.97	2.72398	0.0481432	0.230553	Non-significant
HDGF	OID21455	P51858	Oncology	Timepoint	11.411	3.80365	3	94.5056	2.73088	0.0481695	0.230553	Non-significant
FCER2	OID21133	P06734	Neurology	Timepoint	1.43479	0.478262	3	91.5695	2.73362	0.0481986	0.230553	Non-significant
LAMA4	OID20769	Q16363	Inflammation	Timepoint:progression_status	1.58226	0.527421	3	94.2399	2.73038	0.0482165	0.230553	Non-significant
TIGIT	OID31320	Q495A1	Oncology_II	Timepoint	1.46591	0.488637	3	96.9099	2.72758	0.0482181	0.230553	Non-significant
ADGRD1	OID30588	Q6QNK2	Inflammation_II	Timepoint	1.45226	0.484087	3	91.5647	2.7327	0.0482538	0.230598	Non-significant
PDZK1	OID30550	Q5T2W1	Inflammation_II	Timepoint	8.11022	2.70341	3	94.3611	2.72865	0.0483125	0.230656	Non-significant
HDGFL2	OID31136	Q7Z4V5	Neurology_II	Timepoint	8.34332	2.78111	3	96.1163	2.72673	0.0483182	0.230656	Non-significant
DKK3	OID20264	Q9UBP4	Cardiometabolic	Timepoint	1.74883	0.582945	3	94.7894	2.7269	0.0483905	0.230876	Non-significant
CD1C	OID21483	P29017	Oncology	Timepoint:progression_status	0.881916	0.293972	3	91.8662	2.72879	0.0484682	0.231122	Non-significant
TMOD4	OID31246	Q9NZQ9	Oncology_II	Timepoint:progression_status	8.17156	2.72385	3	132	2.69567	0.0485916	0.231557	Non-significant
CD244	OID20628	Q9BZW8	Inflammation	progression_status	0.398305	0.398305	1	58.1946	4.05653	0.0486314	0.231557	Non-significant
GPKOW	OID20890	Q92917	Neurology	progression_status	1.09809	1.09809	1	63.7056	4.04127	0.0486383	0.231557	Non-significant
PARP1	OID20500	P09874	Inflammation	Timepoint	11.891	3.96367	3	94.1595	2.72088	0.0487954	0.232023	Non-significant
KCTD5	OID31148	Q9NXV2	Neurology_II	Timepoint:progression_status	4.54038	1.51346	3	93.1368	2.72165	0.0488149	0.232023	Non-significant
NMNAT1	OID20913	Q9HAN9	Neurology	progression_status	2.97012	2.97012	1	65.0747	4.03143	0.0488151	0.232023	Non-significant
ICA1	OID20484	Q05084	Inflammation	progression_status	6.46143	6.46143	1	59.7432	4.03855	0.0489952	0.232753	Non-significant
PNPT1	OID20445	Q8TCS8	Inflammation	Timepoint:progression_status	2.75883	0.919609	3	91.3053	2.71998	0.0490396	0.232839	Non-significant
LAT2	OID21292	Q9GZY6	Oncology	Timepoint	10.5107	3.50356	3	102.811	2.70766	0.0490908	0.232957	Non-significant
SLIT2	OID20862	O94813	Neurology	Timepoint	5.25084	1.75028	3	95.1476	2.71353	0.0491803	0.233117	Non-significant
BRK1	OID20883	Q8WUW1	Neurology	Timepoint	3.8105	1.27017	3	92.6771	2.7159	0.049196	0.233117	Non-significant
DENND2B	OID30050	P78524	Cardiometabolic_II	progression_status	0.657918	0.657918	1	53.8498	4.04926	0.0492039	0.233117	Non-significant
EFNA1	OID21125	P20827	Neurology	Timepoint	1.99061	0.663537	3	93.9414	2.71315	0.0492808	0.233289	Non-significant
PHLDB1	OID31467	Q86UU1	Oncology_II	progression_status	2.24704	2.24704	1	68.3115	4.0067	0.0492931	0.233289	Non-significant
IVD	OID20833	P26440	Neurology	Timepoint:progression_status	56.8603	18.9534	3	100.365	2.70364	0.0494747	0.233933	Non-significant
AHSA1	OID31379	O95433	Oncology_II	Timepoint:progression_status	1.41346	0.471152	3	93.2841	2.71058	0.0494822	0.233933	Non-significant
CFP	OID30784	P27918	Inflammation_II	progression_status	0.269144	0.269144	1	59.3949	4.01875	0.0495622	0.234102	Non-significant
VCAN	OID21026	P13611	Neurology	progression_status	1.55369	1.55369	1	66.2338	4.00087	0.0495796	0.234102	Non-significant
SLC1A4	OID30926	P43007	Neurology_II	progression_status	0.684579	0.684579	1	59.6695	4.01669	0.0495976	0.234102	Non-significant
LCAT	OID30677	P04180	Inflammation_II	progression_status	0.645509	0.645509	1	62.0792	4.00812	0.0496557	0.23425	Non-significant
FXN	OID21442	Q16595	Oncology	Timepoint:progression_status	3.22913	1.07638	3	95.12	2.70431	0.0497503	0.234571	Non-significant
JAM3	OID30586	Q9BX67	Inflammation_II	progression_status	0.575795	0.575795	1	60.0278	4.00885	0.0497861	0.234614	Non-significant
PLXDC2	OID31101	Q6UX71	Neurology_II	Timepoint	3.80487	1.26829	3	96.9711	2.70044	0.0498744	0.234756	Non-significant
ANG	OID20403	P03950	Cardiometabolic	Timepoint	1.64643	0.548809	3	94.8878	2.7024	0.0498836	0.234756	Non-significant
RILP	OID21436	Q96NA2	Oncology	Timepoint	2.65909	0.886363	3	95.4102	2.70166	0.0498961	0.234756	Non-significant
DNAJC21	OID31104	Q5F1R6	Neurology_II	progression_status	0.551654	0.551654	1	66.9902	3.98444	0.0499898	0.235072	Non-significant
ADAMTS1	OID30528	Q9UHI8	Inflammation_II	progression_status	0.803627	0.803627	1	65.5204	3.98526	0.0500587	0.235271	Non-significant
ZBTB16	OID21205	Q05516	Oncology	progression_status	1.25035	1.25035	1	132	3.90955	0.050096	0.23532	Non-significant
GRPEL1	OID21309	Q9HAV7	Oncology	progression_status	7.85315	7.85315	1	61.6758	3.99101	0.0501589	0.235491	Non-significant
ECHDC3	OID30293	Q96DC8	Cardiometabolic_II	progression_status	5.06651	5.06651	1	62.622	3.98601	0.0502314	0.235705	Non-significant
ARL13B	OID30166	Q3SXY8	Cardiometabolic_II	Timepoint:progression_status	2.01386	0.671285	3	96.9224	2.69286	0.0503511	0.236141	Non-significant
VSIG4	OID21144	Q9Y279	Neurology	Timepoint	2.83652	0.945506	3	92.5991	2.69623	0.0504185	0.236285	Non-significant
ATG16L1	OID31466	Q676U5	Oncology_II	Timepoint:progression_status	3.04562	1.01521	3	94.4645	2.694	0.0504353	0.236285	Non-significant
CD200R1	OID20595	Q8TD46	Inflammation	progression_status	0.504181	0.504181	1	49.7904	4.01685	0.0505024	0.236474	Non-significant
DHRS4L2	OID31072	Q6PKH6	Neurology_II	Timepoint:progression_status	1.14391	0.381302	3	105.576	2.68133	0.0505883	0.23675	Non-significant
CEACAM18	OID31251	A8MTB9	Oncology_II	Timepoint	0.776606	0.258869	3	99.7012	2.68566	0.0506387	0.23686	Non-significant
PPP1CC	OID31360	P36873	Oncology_II	Timepoint:progression_status	1.32083	0.440277	3	94.7082	2.689	0.0507345	0.237182	Non-significant
IRAK1	OID20485	P51617	Inflammation	progression_status	1.63476	1.63476	1	70.119	3.94604	0.0508911	0.237788	Non-significant
PTTG1	OID31326	O95997	Oncology_II	Timepoint	1.20208	0.400693	3	102.194	2.67842	0.0509558	0.237964	Non-significant
ICAM4	OID20578	Q14773	Inflammation	progression_status	0.797117	0.797117	1	58.9581	3.96633	0.0510579	0.238315	Non-significant
SPINK1	OID21097	P00995	Neurology	Timepoint	3.82713	1.27571	3	94.6764	2.68334	0.0510951	0.238363	Non-significant
CLSPN	OID20831	Q9HAW4	Neurology	progression_status	1.21014	1.21014	1	52.5111	3.97455	0.0513987	0.239652	Non-significant
DPT	OID20278	Q07507	Cardiometabolic	Timepoint:progression_status	1.41929	0.473097	3	91.2324	2.68059	0.0515029	0.240011	Non-significant
ALDH2	OID31380	P05091	Oncology_II	Timepoint	5.65443	1.88481	3	93.514	2.67766	0.0515345	0.240032	Non-significant
CERT	OID20857	Q9Y5P4	Neurology	Timepoint	21.8888	7.29626	3	132	2.64637	0.0517367	0.240623	Non-significant
S100A16	OID20878	Q96FQ6	Neurology	Timepoint:progression_status	12.5896	4.19654	3	94.9864	2.67275	0.0517527	0.240623	Non-significant
SIRT1	OID30439	Q96EB6	Inflammation_II	Timepoint	1.34527	0.448424	3	100.298	2.66744	0.0517694	0.240623	Non-significant
IL1RL1	OID20250	Q01638	Cardiometabolic	Timepoint:progression_status	3.52157	1.17386	3	93.3301	2.67417	0.0517706	0.240623	Non-significant
CD160	OID20647	O95971	Inflammation	progression_status	0.792172	0.792172	1	55.4008	3.94785	0.0518851	0.241028	Non-significant
PEAR1	OID20257	Q5VY43	Cardiometabolic	Timepoint	0.865164	0.288388	3	94.9399	2.66925	0.0519817	0.241349	Non-significant
CALB1	OID21306	P05937	Oncology	Timepoint:progression_status	1.75951	0.586502	3	94.1891	2.66931	0.052027	0.241433	Non-significant
CDC26	OID31508	Q8NHZ8	Oncology_II	Timepoint	1.27547	0.425158	3	94.2126	2.66885	0.0520556	0.241438	Non-significant
DTD1	OID30580	Q8TEA8	Inflammation_II	Timepoint:progression_status	2.18683	0.728943	3	99.7246	2.66284	0.052102	0.241527	Non-significant
LACTB2	OID20150	Q53H82	Cardiometabolic	Timepoint:progression_status	3.04018	1.01339	3	95.0547	2.6643	0.0522961	0.242299	Non-significant
SWAP70	OID31477	Q9UH65	Oncology_II	Timepoint:progression_status	1.99994	0.666647	3	93.9861	2.66388	0.0523931	0.242516	Non-significant
SERPINI1	OID30604	Q99574	Inflammation_II	Timepoint	1.58257	0.527522	3	94.6907	2.6631	0.052398	0.242516	Non-significant
CCL16	OID20334	O15467	Cardiometabolic	Timepoint	2.34719	0.782398	3	93.7515	2.66158	0.0525592	0.243135	Non-significant
MTHFD2	OID31078	P13995	Neurology_II	Timepoint:progression_status	0.487424	0.162475	3	96.333	2.65826	0.0526086	0.243235	Non-significant
ERVV-1	OID30094	B6SEH8	Cardiometabolic_II	progression_status	1.06	1.06	1	65.7593	3.89368	0.0526735	0.243408	Non-significant
MME	OID21307	P08473	Oncology	Timepoint	5.06399	1.688	3	91.7256	2.66108	0.0527304	0.243543	Non-significant
SEPTIN3	OID31025	Q9UH03	Neurology_II	Timepoint:progression_status	1.96766	0.655888	3	91.7059	2.66027	0.0527849	0.243551	Non-significant
LAYN	OID20970	Q6UX15	Neurology	Timepoint	1.47126	0.49042	3	93.1364	2.65873	0.0527874	0.243551	Non-significant
TPD52L2	OID30609	O43399	Inflammation_II	Timepoint	5.30232	1.76744	3	96.5796	2.65391	0.0528787	0.243845	Non-significant
CRYZL1	OID30272	O95825	Cardiometabolic_II	Timepoint:progression_status	4.87843	1.62614	3	94.6697	2.65333	0.05304	0.244421	Non-significant
TDRKH	OID20875	Q9Y2W6	Neurology	progression_status	3.56739	3.56739	1	66.9517	3.87793	0.0530651	0.244421	Non-significant
CCL7	OID20523	P80098	Inflammation	Timepoint	3.92867	1.30956	3	92.9315	2.65439	0.0530868	0.244421	Non-significant
MYLPF	OID30917	Q96A32	Neurology_II	progression_status	0.681833	0.681833	1	67.9509	3.87307	0.0531491	0.24458	Non-significant
RGS8	OID20454	P57771	Inflammation	progression_status	1.41488	1.41488	1	63.6758	3.87789	0.0532806	0.245057	Non-significant
AHNAK2	OID30244	Q8IVF2	Cardiometabolic_II	progression_status	0.626664	0.626664	1	60.0969	3.88116	0.0534437	0.24568	Non-significant
CD46	OID20380	P15529	Cardiometabolic	Timepoint	1.04289	0.347629	3	93.4023	2.64736	0.0535205	0.24584	Non-significant
ZFYVE19	OID31452	Q96K21	Oncology_II	Timepoint:progression_status	3.06309	1.02103	3	96.1994	2.64412	0.0535521	0.24584	Non-significant
KIRREL1	OID30806	Q96J84	Neurology_II	progression_status	1.0334	1.0334	1	62.4302	3.87139	0.0535622	0.24584	Non-significant
ARG1	OID21445	P05089	Oncology	Timepoint:progression_status	5.11721	1.70574	3	101.963	2.63653	0.0537124	0.246325	Non-significant
DCC	OID30953	P43146	Neurology_II	Timepoint:progression_status	0.873464	0.291155	3	102.75	2.63569	0.0537239	0.246325	Non-significant
IL18RAP	OID20900	O95256	Neurology	Timepoint:progression_status	4.84053	1.61351	3	91.2	2.64416	0.0538872	0.246936	Non-significant
SNX9	OID20135	Q9Y5X1	Cardiometabolic	Timepoint:progression_status	1.50948	0.50316	3	96.0976	2.63883	0.0539131	0.246936	Non-significant
CETN3	OID31525	O15182	Oncology_II	progression_status	1.29827	1.29827	1	62.0452	3.85728	0.0540146	0.247236	Non-significant
PON1	OID30704	P27169	Inflammation_II	progression_status	0.559371	0.559371	1	59.2413	3.86278	0.0540621	0.247236	Non-significant
IGHMBP2	OID30123	P38935	Cardiometabolic_II	Timepoint:progression_status	1.40898	0.46966	3	94.2202	2.63794	0.0540957	0.247236	Non-significant
DDT	OID30372	P30046	Cardiometabolic_II	Timepoint	2.93096	0.976985	3	94.307	2.63763	0.0541108	0.247236	Non-significant
ACSL1	OID30080	P33121	Cardiometabolic_II	progression_status	0.459209	0.459209	1	50.8497	3.88635	0.0541333	0.247236	Non-significant
CCAR2	OID31077	Q8N163	Neurology_II	Timepoint:progression_status	5.39265	1.79755	3	94.4461	2.63663	0.0541694	0.247236	Non-significant
MXRA8	OID30583	Q9BRK3	Inflammation_II	Timepoint	1.39609	0.465364	3	95.7899	2.63474	0.054208	0.247236	Non-significant
CDC27	OID21238	P30260	Oncology	progression_status	5.11638	5.11638	1	63.9212	3.8452	0.0542487	0.247236	Non-significant
LGALS4	OID20748	P56470	Inflammation	progression_status	1.91075	1.91075	1	55.9639	3.86405	0.0543001	0.247236	Non-significant
CSF3	OID20491	P09919	Inflammation	Timepoint	2.84289	0.947629	3	94.98	2.63411	0.0543037	0.247236	Non-significant
EP300	OID30438	Q09472	Inflammation_II	Timepoint:progression_status	2.83731	0.945771	3	105.122	2.62513	0.0543081	0.247236	Non-significant
GSR	OID30700	P00390	Inflammation_II	Timepoint	1.49873	0.499575	3	92.1641	2.63677	0.0543152	0.247236	Non-significant
C9orf40	OID31489	Q8IXQ3	Oncology_II	Timepoint	3.68052	1.22684	3	97.4885	2.63037	0.0543957	0.247247	Non-significant
TPP1	OID20750	O14773	Inflammation	Timepoint:progression_status	2.70735	0.902451	3	95.9296	2.63175	0.0544014	0.247247	Non-significant
HARS1	OID21086	P12081	Neurology	Timepoint	2.18434	0.728114	3	96.6841	2.63103	0.0544017	0.247247	Non-significant
LGALS8	OID21041	O00214	Neurology	Timepoint:progression_status	1.55717	0.519058	3	95.1883	2.63178	0.0544481	0.247331	Non-significant
CPQ	OID30406	Q9Y646	Cardiometabolic_II	progression_status	0.728462	0.728462	1	62.3404	3.83242	0.0547504	0.248413	Non-significant
MYO6	OID30989	Q9UM54	Neurology_II	Timepoint:progression_status	1.00221	0.33407	3	103.518	2.6197	0.0547671	0.248413	Non-significant
EXTL1	OID30114	Q92935	Cardiometabolic_II	Timepoint	0.607654	0.202551	3	93.2952	2.62871	0.0547832	0.248413	Non-significant
VAMP8	OID30555	Q9BV40	Inflammation_II	Timepoint:progression_status	6.84147	2.28049	3	93.8049	2.62797	0.0547992	0.248413	Non-significant
KLF4	OID30808	O43474	Neurology_II	Timepoint	2.92341	0.974471	3	100.99	2.61955	0.0549224	0.248844	Non-significant
TINAGL1	OID20180	Q9GZM7	Cardiometabolic	Timepoint	1.30848	0.436159	3	95.4535	2.62254	0.0550607	0.249343	Non-significant
LRG1	OID30751	P02750	Inflammation_II	Timepoint:progression_status	1.80723	0.602411	3	95.1722	2.62239	0.055089	0.249343	Non-significant
PODXL2	OID21487	Q9NZ53	Oncology	progression_status	0.76789	0.76789	1	53.893	3.84026	0.0552161	0.249697	Non-significant
CHRDL1	OID20771	Q9BU40	Inflammation	Timepoint	2.69954	0.899847	3	93.2493	2.62231	0.0552239	0.249697	Non-significant
MTIF3	OID31513	Q9H2K0	Oncology_II	Timepoint	2.96785	0.989282	3	97.3381	2.61597	0.0553911	0.250248	Non-significant
GGACT	OID30290	Q9BVM4	Cardiometabolic_II	progression_status	0.799103	0.799103	1	67.7069	3.7998	0.0554025	0.250248	Non-significant
YAP1	OID31113	P46937	Neurology_II	progression_status	1.03781	1.03781	1	57.9472	3.8195	0.0554904	0.250346	Non-significant
CRKL	OID20742	P46109	Inflammation	Timepoint	6.15323	2.05108	3	95.4919	2.61618	0.0554958	0.250346	Non-significant
ELOB	OID30127	Q15370	Cardiometabolic_II	Timepoint:progression_status	0.550779	0.183593	3	100.78	2.61122	0.0555094	0.250346	Non-significant
EFNA4	OID20935	P52798	Neurology	Timepoint:progression_status	2.1392	0.713065	3	93.6293	2.61612	0.0556246	0.250737	Non-significant
SIT1	OID20462	Q9Y3P8	Inflammation	Timepoint	3.81578	1.27193	3	96.7408	2.61181	0.0557173	0.250854	Non-significant
SDHB	OID31436	P21912	Oncology_II	progression_status	3.9287	3.9287	1	63.3592	3.79846	0.0557303	0.250854	Non-significant
LRFN2	OID30895	Q9ULH4	Neurology_II	Timepoint	1.4213	0.473765	3	97.4881	2.61057	0.0557561	0.250854	Non-significant
PF4	OID30764	P02776	Inflammation_II	Timepoint	5.73621	1.91207	3	97.3984	2.61018	0.0557888	0.250854	Non-significant
TNXB	OID21107	P22105	Neurology	Timepoint:progression_status	1.28532	0.428441	3	93.8518	2.61347	0.0557927	0.250854	Non-significant
BTC	OID21199	P35070	Oncology	progression_status	3.7267	3.7267	1	73.2411	3.7653	0.0561761	0.252449	Non-significant
SEC31A	OID30269	O94979	Cardiometabolic_II	Timepoint:progression_status	2.42446	0.808153	3	95.5069	2.60594	0.0562069	0.252459	Non-significant
NAP1L4	OID31475	Q99733	Oncology_II	Timepoint	3.67254	1.22418	3	95.1509	2.60563	0.0562517	0.252531	Non-significant
SF3B4	OID21278	Q15427	Oncology	Timepoint:progression_status	4.30692	1.43564	3	96.1166	2.60416	0.0562917	0.252582	Non-significant
NAA10	OID30188	P41227	Cardiometabolic_II	Timepoint	13.9594	4.65312	3	132	2.5791	0.0563558	0.252679	Non-significant
CDA	OID30345	P32320	Cardiometabolic_II	Timepoint:progression_status	2.73479	0.911596	3	94.666	2.60387	0.0564075	0.252679	Non-significant
NPM1	OID20961	P06748	Neurology	progression_status	3.38831	3.38831	1	66.3547	3.77036	0.056416	0.252679	Non-significant
CIAPIN1	OID21501	Q6FI81	Oncology	Timepoint	3.14186	1.04729	3	97.8921	2.6006	0.0564278	0.252679	Non-significant
CDKN1A	OID21319	P38936	Oncology	Timepoint	10.1725	3.39084	3	96.8205	2.59983	0.0565503	0.253099	Non-significant
SHC1	OID31222	P29353	Oncology_II	Timepoint	3.57968	1.19323	3	95.5791	2.59855	0.0567212	0.253685	Non-significant
NFIC	OID30988	P08651	Neurology_II	Timepoint	0.777572	0.259191	3	96.2033	2.59772	0.0567389	0.253685	Non-significant
PDCD1LG2	OID21273	Q9BQ51	Oncology	Timepoint	11.3402	3.78007	3	104.84	2.58895	0.0568431	0.253934	Non-significant
CLEC5A	OID20165	Q9NY25	Cardiometabolic	progression_status	0.559444	0.559444	1	53.8054	3.78724	0.0568754	0.253934	Non-significant
ACTN4	OID20435	O43707	Inflammation	progression_status	0.412631	0.412631	1	66.5874	3.75535	0.0568809	0.253934	Non-significant
NPTX1	OID21074	Q15818	Neurology	Timepoint:progression_status	1.56678	0.522258	3	92.8241	2.59812	0.0569394	0.254005	Non-significant
SCGN	OID20457	O76038	Inflammation	progression_status	1.29917	1.29917	1	54.4079	3.78253	0.0569664	0.254005	Non-significant
ARHGEF12	OID20554	Q9NZN5	Inflammation	Timepoint	2.53258	0.844192	3	101.12	2.58997	0.0569833	0.254005	Non-significant
SEPTIN8	OID31079	Q92599	Neurology_II	Timepoint:progression_status	2.95209	0.984029	3	94.2212	2.59553	0.0570261	0.254061	Non-significant
TCN1	OID30687	P20061	Inflammation_II	Timepoint:progression_status	1.14706	0.382353	3	96.1044	2.59338	0.0570535	0.254061	Non-significant
ST6GAL1	OID20302	P15907	Cardiometabolic	progression_status	1.77935	1.77935	1	68.046	3.7457	0.0571002	0.254141	Non-significant
MGLL	OID20711	Q99685	Inflammation	Timepoint:progression_status	2.61995	0.873317	3	94.953	2.59282	0.0571694	0.254224	Non-significant
PSMD5	OID30918	Q16401	Neurology_II	Timepoint	1.21893	0.40631	3	96.373	2.59087	0.0572144	0.254224	Non-significant
HS3ST3B1	OID21303	Q9Y662	Oncology	Timepoint:progression_status	5.45336	1.81779	3	94.3371	2.59156	0.0573005	0.254224	Non-significant
NOS3	OID20834	P29474	Neurology	progression_status	1.04457	1.04457	1	55.0691	3.76997	0.0573035	0.254224	Non-significant
PSME2	OID20989	Q9UL46	Neurology	Timepoint	1.72807	0.576023	3	95.3906	2.59033	0.0573174	0.254224	Non-significant
CERT	OID20857	Q9Y5P4	Neurology	Timepoint:progression_status	21.2201	7.07336	3	132	2.56553	0.0573362	0.254224	Non-significant
PDXDC1	OID31226	Q6P996	Oncology_II	Timepoint	1.53857	0.512856	3	102.165	2.58403	0.0573467	0.254224	Non-significant
FUS	OID21256	P35637	Oncology	progression_status	1.59317	1.59317	1	63.4548	3.74695	0.0573621	0.254224	Non-significant
GLRX5	OID30663	Q86SX6	Inflammation_II	Timepoint:progression_status	4.20245	1.40082	3	96.4963	2.58846	0.0573786	0.254224	Non-significant
GET3	OID30303	O43681	Cardiometabolic_II	progression_status	0.828426	0.828426	1	70.418	3.73123	0.057429	0.25432	Non-significant
SLC9A3R2	OID31445	Q15599	Oncology_II	Timepoint:progression_status	1.74096	0.580321	3	92.32	2.59126	0.0574622	0.25434	Non-significant
PLAUR	OID20764	Q03405	Inflammation	Timepoint:progression_status	1.83367	0.611222	3	92.2239	2.5903	0.0575379	0.25438	Non-significant
ENDOU	OID31498	P21128	Oncology_II	progression_status	0.546317	0.546317	1	53.8251	3.76481	0.0575878	0.25438	Non-significant
CTSH	OID20113	P09668	Cardiometabolic	Timepoint:progression_status	1.8988	0.632933	3	94.2711	2.58712	0.0576223	0.25438	Non-significant
KEL	OID20881	P23276	Neurology	Timepoint:progression_status	1.75009	0.583363	3	94.3171	2.58682	0.0576407	0.25438	Non-significant
TIMP1	OID20418	P01033	Cardiometabolic	Timepoint:progression_status	1.81668	0.60556	3	92.3703	2.58871	0.0576412	0.25438	Non-significant
INSL5	OID31448	Q9Y5Q6	Oncology_II	Timepoint:progression_status	7.16189	2.3873	3	97.46	2.58388	0.0576445	0.25438	Non-significant
SLIRP	OID31174	Q9GZT3	Oncology_II	Timepoint	0.583573	0.194524	3	99.075	2.58132	0.057727	0.254617	Non-significant
[truncated: 6,818 more rows]

## Sheet: Significant interaction
Assay	OlinkID	UniProt	Panel	term	contrast	estimate	conf.low	conf.high	Adjusted_pval	Threshold	Timepoint_Comparison	Response_Comparison
PRND	OID31124	Q9UKY0	Neurology_II	Timepoint:progression_status	B slow - FU2 slow	-1.76815	-2.28998	-1.24631	4.22379e-10	Significant	B-FU2	slow-slow
AGER	OID20756	Q15109	Inflammation	Timepoint:progression_status	B slow - FU2 slow	-1.07266	-1.46119	-0.684131	4.43481e-10	Significant	B-FU2	slow-slow
PRND	OID31124	Q9UKY0	Neurology_II	Timepoint:progression_status	FU1 slow - FU2 slow	-1.35924	-1.88108	-0.837406	5.00571e-10	Significant	FU1-FU2	slow-slow
BPIFB1	OID20308	Q8TDL5	Cardiometabolic	Timepoint:progression_status	B slow - FU2 slow	-1.15041	-1.6243	-0.676525	1.45649e-09	Significant	B-FU2	slow-slow
FABP9	OID20501	Q0Z7S8	Inflammation	Timepoint:progression_status	FU3 fast - FU2 slow	-2.37984	-3.47082	-1.28887	1.69828e-08	Significant	FU3-FU2	fast-slow
FABP9	OID20501	Q0Z7S8	Inflammation	Timepoint:progression_status	FU3 fast - FU1 slow	-2.31189	-3.40201	-1.22178	4.29848e-08	Significant	FU3-FU1	fast-slow
FABP9	OID20501	Q0Z7S8	Inflammation	Timepoint:progression_status	B fast - FU3 fast	1.80391	0.956467	2.65136	6.9739e-08	Significant	B-FU3	fast-fast
FABP9	OID20501	Q0Z7S8	Inflammation	Timepoint:progression_status	FU3 fast - B slow	-2.22591	-3.31602	-1.13579	1.41043e-07	Significant	FU3-B	fast-slow
PGF	OID20673	P49763	Inflammation	Timepoint:progression_status	FU3 fast - B slow	2.16439	1.09526	3.23352	1.5695e-07	Significant	FU3-B	fast-slow
BPIFB1	OID20308	Q8TDL5	Cardiometabolic	Timepoint:progression_status	FU1 slow - FU2 slow	-0.968907	-1.4428	-0.495017	2.4e-07	Significant	FU1-FU2	slow-slow
RARRES1	OID21177	P49788	Oncology	Timepoint:progression_status	FU2 fast - FU1 slow	1.1854	0.59751	1.77328	3.54212e-07	Significant	FU2-FU1	fast-slow
PGF	OID20673	P49763	Inflammation	Timepoint:progression_status	FU3 fast - FU1 slow	2.08995	1.02082	3.15908	4.46734e-07	Significant	FU3-FU1	fast-slow
PGF	OID20673	P49763	Inflammation	Timepoint:progression_status	FU1 fast - FU3 fast	-1.87973	-2.83674	-0.922733	6.48388e-07	Significant	FU1-FU3	fast-fast
SPINT3	OID31509	P49223	Oncology_II	Timepoint:progression_status	B fast - FU1 fast	1.59432	0.781768	2.40687	7.58423e-07	Significant	B-FU1	fast-fast
FABP9	OID20501	Q0Z7S8	Inflammation	Timepoint:progression_status	FU3 fast - FU3 slow	-2.17936	-3.31214	-1.04657	7.60866e-07	Significant	FU3-FU3	fast-slow
AGER	OID20756	Q15109	Inflammation	Timepoint:progression_status	FU1 slow - FU2 slow	-0.76166	-1.15019	-0.373131	7.72713e-07	Significant	FU1-FU2	slow-slow
FABP9	OID20501	Q0Z7S8	Inflammation	Timepoint:progression_status	FU2 fast - FU3 fast	1.66127	0.805707	2.51683	9.50307e-07	Significant	FU2-FU3	fast-fast
KLK4	OID21391	Q9Y5K2	Oncology	Timepoint:progression_status	FU3 fast - FU2 slow	3.80619	1.79089	5.82149	1.18753e-06	Significant	FU3-FU2	fast-slow
PGF	OID20673	P49763	Inflammation	Timepoint:progression_status	FU3 fast - FU2 slow	1.99237	0.922131	3.0626	1.75561e-06	Significant	FU3-FU2	fast-slow
RARRES1	OID21177	P49788	Oncology	Timepoint:progression_status	FU2 fast - FU2 slow	1.11759	0.527955	1.70723	1.82962e-06	Significant	FU2-FU2	fast-slow
PGF	OID20673	P49763	Inflammation	Timepoint:progression_status	B fast - FU3 fast	-1.79881	-2.75581	-0.841806	2.07833e-06	Significant	B-FU3	fast-fast
KLK4	OID21391	Q9Y5K2	Oncology	Timepoint:progression_status	FU2 fast - FU2 slow	2.57141	1.22418	3.91865	2.28498e-06	Significant	FU2-FU2	fast-slow
FABP9	OID20501	Q0Z7S8	Inflammation	Timepoint:progression_status	FU1 fast - FU3 fast	1.56741	0.719967	2.41486	3.29564e-06	Significant	FU1-FU3	fast-fast
KLK4	OID21391	Q9Y5K2	Oncology	Timepoint:progression_status	FU3 fast - B slow	3.61973	1.60641	5.63306	4.38496e-06	Significant	FU3-B	fast-slow
AGR2	OID20896	O95994	Neurology	Timepoint:progression_status	FU2 fast - FU2 slow	4.3098	1.92761	6.69199	4.74716e-06	Significant	FU2-FU2	fast-slow
AGR2	OID20896	O95994	Neurology	Timepoint:progression_status	B fast - FU2 slow	3.9638	1.76556	6.16204	6.0953e-06	Significant	B-FU2	fast-slow
PGF	OID20673	P49763	Inflammation	Timepoint:progression_status	FU3 fast - FU3 slow	1.99458	0.869618	3.11953	6.25269e-06	Significant	FU3-FU3	fast-slow
IL6	OID21276	P05231	Oncology	Timepoint:progression_status	FU2 fast - FU1 slow	2.91575	1.29654	4.53495	6.28702e-06	Significant	FU2-FU1	fast-slow
KLK4	OID21391	Q9Y5K2	Oncology	Timepoint:progression_status	FU1 fast - FU2 slow	2.3527	1.06243	3.64298	8.5934e-06	Significant	FU1-FU2	fast-slow
AGR2	OID20896	O95994	Neurology	Timepoint:progression_status	B slow - FU2 slow	2.49809	1.09415	3.90202	8.68731e-06	Significant	B-FU2	slow-slow
KRT19	OID20596	P08727	Inflammation	Timepoint:progression_status	B slow - FU2 slow	1.9416	0.849508	3.03369	8.97563e-06	Significant	B-FU2	slow-slow
RBM17	OID31034	Q96I25	Neurology_II	Timepoint:progression_status	FU1 fast - FU3 fast	-2.8458	-4.47463	-1.21698	9.75249e-06	Significant	FU1-FU3	fast-fast
KLK4	OID21391	Q9Y5K2	Oncology	Timepoint:progression_status	FU3 fast - FU1 slow	3.49728	1.48395	5.51061	1.02951e-05	Significant	FU3-FU1	fast-slow
IL6	OID20911	P05231	Neurology	Timepoint:progression_status	FU2 fast - FU1 slow	2.85036	1.22096	4.47975	1.25657e-05	Significant	FU2-FU1	fast-slow
KLK4	OID21391	Q9Y5K2	Oncology	Timepoint:progression_status	FU2 fast - B slow	2.38496	1.0405	3.72941	1.25907e-05	Significant	FU2-B	fast-slow
NGRN	OID31115	Q9NPE2	Neurology_II	Timepoint:progression_status	B fast - FU1 fast	0.568793	0.242234	0.895353	1.45813e-05	Significant	B-FU1	fast-fast
IL6	OID21276	P05231	Oncology	Timepoint:progression_status	FU2 fast - FU2 slow	2.79612	1.17182	4.42041	1.76772e-05	Significant	FU2-FU2	fast-slow
IL6	OID20911	P05231	Neurology	Timepoint:progression_status	FU2 fast - FU2 slow	2.79869	1.16426	4.43313	2.01687e-05	Significant	FU2-FU2	fast-slow
RARRES1	OID21177	P49788	Oncology	Timepoint:progression_status	FU2 fast - B slow	0.993285	0.405399	1.58117	2.767e-05	Significant	FU2-B	fast-slow
IL6	OID21276	P05231	Oncology	Timepoint:progression_status	FU2 fast - B slow	2.7175	1.09829	4.3367	3.1038e-05	Significant	FU2-B	fast-slow
LEP	OID20187	P41159	Cardiometabolic	Timepoint:progression_status	B slow - FU2 slow	-1.07109	-1.7085	-0.433677	3.12149e-05	Significant	B-FU2	slow-slow
CPM	OID21054	P14384	Neurology	Timepoint:progression_status	B slow - FU2 slow	-0.668023	-1.06915	-0.266893	3.78767e-05	Significant	B-FU2	slow-slow
KLK4	OID21391	Q9Y5K2	Oncology	Timepoint:progression_status	FU2 fast - FU1 slow	2.2625	0.918046	3.60696	3.84796e-05	Significant	FU2-FU1	fast-slow
IL6	OID20911	P05231	Neurology	Timepoint:progression_status	FU2 fast - B slow	2.7047	1.0753	4.33409	3.97072e-05	Significant	FU2-B	fast-slow
KLK4	OID21391	Q9Y5K2	Oncology	Timepoint:progression_status	FU1 fast - B slow	2.16625	0.878841	3.45366	4.62138e-05	Significant	FU1-B	fast-slow
PGF	OID20673	P49763	Inflammation	Timepoint:progression_status	FU2 fast - FU3 fast	-1.58161	-2.54905	-0.614173	5.28289e-05	Significant	FU2-FU3	fast-fast
PRND	OID31124	Q9UKY0	Neurology_II	Timepoint:progression_status	B slow - FU3 slow	-1.25997	-2.03475	-0.485187	5.92802e-05	Significant	B-FU3	slow-slow
CRH	OID21257	P06850	Oncology	Timepoint:progression_status	B slow - FU2 slow	-1.56693	-2.53501	-0.598852	6.86408e-05	Significant	B-FU2	slow-slow
GADD45GIP1	OID30237	Q8TAE8	Cardiometabolic_II	Timepoint:progression_status	FU1 fast - FU2 fast	-0.800711	-1.30237	-0.299051	8.74717e-05	Significant	FU1-FU2	fast-fast
LEO1	OID30991	Q8WVC0	Neurology_II	Timepoint:progression_status	FU1 fast - FU2 fast	-1.6447	-2.67496	-0.614443	8.78429e-05	Significant	FU1-FU2	fast-fast
LEP	OID20187	P41159	Cardiometabolic	Timepoint:progression_status	FU1 fast - FU2 slow	-2.1036	-3.41146	-0.795731	0.000101021	Significant	FU1-FU2	fast-slow
IL6	OID20911	P05231	Neurology	Timepoint:progression_status	FU1 fast - FU2 fast	-2.02496	-3.30717	-0.74275	0.000107876	Significant	FU1-FU2	fast-fast
LEP	OID20187	P41159	Cardiometabolic	Timepoint:progression_status	FU2 fast - FU2 slow	-2.17942	-3.55491	-0.803922	0.000116002	Significant	FU2-FU2	fast-slow
GNE	OID21231	Q9Y223	Oncology	Timepoint:progression_status	B fast - B slow	1.01068	0.356985	1.66438	0.000133737	Significant	B-B	fast-slow
KLK4	OID21391	Q9Y5K2	Oncology	Timepoint:progression_status	FU1 fast - FU1 slow	2.04379	0.756385	3.3312	0.000138508	Significant	FU1-FU1	fast-slow
AGER	OID20756	Q15109	Inflammation	Timepoint:progression_status	B fast - FU2 slow	-1.10542	-1.80983	-0.400999	0.000142403	Significant	B-FU2	fast-slow
NGRN	OID31115	Q9NPE2	Neurology_II	Timepoint:progression_status	B fast - FU1 slow	0.553963	0.196012	0.911913	0.000150648	Significant	B-FU1	fast-slow
RBM17	OID31034	Q96I25	Neurology_II	Timepoint:progression_status	FU3 fast - FU2 slow	2.49115	0.86818	4.11412	0.000153429	Significant	FU3-FU2	fast-slow
RBM17	OID31034	Q96I25	Neurology_II	Timepoint:progression_status	FU3 fast - FU1 slow	2.47033	0.849257	4.09139	0.000176563	Significant	FU3-FU1	fast-slow
KLK4	OID21391	Q9Y5K2	Oncology	Timepoint:progression_status	FU3 fast - FU3 slow	3.20601	1.09398	5.31804	0.000189119	Significant	FU3-FU3	fast-slow
AGR2	OID20896	O95994	Neurology	Timepoint:progression_status	FU2 slow - FU3 slow	-3.12619	-5.19329	-1.05908	0.000235311	Significant	FU2-FU3	slow-slow
IL6	OID21276	P05231	Oncology	Timepoint:progression_status	FU1 fast - FU2 fast	-1.94257	-3.22768	-0.657454	0.000245864	Significant	FU1-FU2	fast-fast
CRH	OID21257	P06850	Oncology	Timepoint:progression_status	FU2 slow - FU3 slow	2.14865	0.718469	3.57884	0.000269011	Significant	FU2-FU3	slow-slow
KRT19	OID20596	P08727	Inflammation	Timepoint:progression_status	B fast - FU2 slow	3.01218	1.00781	5.01654	0.000315366	Significant	B-FU2	fast-slow
LEP	OID20187	P41159	Cardiometabolic	Timepoint:progression_status	FU1 slow - FU2 slow	-0.950485	-1.5879	-0.313074	0.000320329	Significant	FU1-FU2	slow-slow
CHCHD6	OID31426	Q9BRQ6	Oncology_II	Timepoint:progression_status	B fast - FU2 slow	1.03312	0.338803	1.72745	0.000321121	Significant	B-FU2	fast-slow
RBM17	OID31034	Q96I25	Neurology_II	Timepoint:progression_status	FU3 fast - FU3 slow	2.53943	0.815266	4.26359	0.000334863	Significant	FU3-FU3	fast-slow
KRT19	OID20596	P08727	Inflammation	Timepoint:progression_status	FU2 fast - FU2 slow	3.15137	1.01975	5.283	0.000378281	Significant	FU2-FU2	fast-slow
AGER	OID20756	Q15109	Inflammation	Timepoint:progression_status	FU1 fast - FU2 slow	-1.03144	-1.73585	-0.327019	0.000482907	Significant	FU1-FU2	fast-slow
CBX2	OID30177	Q14781	Cardiometabolic_II	Timepoint:progression_status	FU3 fast - FU3 slow	1.57554	0.478747	2.67234	0.000523867	Significant	FU3-FU3	fast-slow
NGRN	OID31115	Q9NPE2	Neurology_II	Timepoint:progression_status	B fast - FU2 slow	0.510811	0.151133	0.87049	0.000695255	Significant	B-FU2	fast-slow
NGRN	OID31115	Q9NPE2	Neurology_II	Timepoint:progression_status	FU1 fast - FU2 fast	-0.512136	-0.872854	-0.151418	0.000722824	Significant	FU1-FU2	fast-fast
RBM17	OID31034	Q96I25	Neurology_II	Timepoint:progression_status	FU3 fast - B slow	2.27343	0.652364	3.8945	0.000786069	Significant	FU3-B	fast-slow
KRT19	OID20596	P08727	Inflammation	Timepoint:progression_status	B fast - FU1 fast	2.04449	0.597749	3.49122	0.000799771	Significant	B-FU1	fast-fast
CHCHD6	OID31426	Q9BRQ6	Oncology_II	Timepoint:progression_status	FU2 fast - FU2 slow	1.05934	0.304812	1.81388	0.000819407	Significant	FU2-FU2	fast-slow
EIF4G3	OID31022	O43432	Neurology_II	Timepoint:progression_status	B fast - FU3 fast	1.66335	0.472847	2.85386	0.000842762	Significant	B-FU3	fast-fast
UPB1	OID30352	Q9UBR1	Cardiometabolic_II	Timepoint:progression_status	B slow - FU2 slow	-1.43225	-2.45067	-0.413827	0.000860361	Significant	B-FU2	slow-slow
CRH	OID21257	P06850	Oncology	Timepoint:progression_status	B fast - FU2 slow	-2.21483	-3.80282	-0.626854	0.000999176	Significant	B-FU2	fast-slow
GADD45GIP1	OID30237	Q8TAE8	Cardiometabolic_II	Timepoint:progression_status	FU2 fast - FU1 slow	0.7732	0.212719	1.33368	0.00108852	Significant	FU2-FU1	fast-slow
ARAF	OID31260	P10398	Oncology_II	Timepoint:progression_status	FU1 fast - FU3 fast	1.92443	0.532295	3.31656	0.00109192	Significant	FU1-FU3	fast-fast
RBM17	OID31034	Q96I25	Neurology_II	Timepoint:progression_status	B fast - FU3 fast	-2.24022	-3.86904	-0.611393	0.00110789	Significant	B-FU3	fast-fast
AGR2	OID20896	O95994	Neurology	Timepoint:progression_status	FU2 fast - FU1 slow	3.26791	0.894484	5.64135	0.00113243	Significant	FU2-FU1	fast-slow
CHAD	OID30660	O15335	Inflammation_II	Timepoint:progression_status	B slow - FU2 slow	-0.694387	-1.19682	-0.191958	0.00113513	Significant	B-FU2	slow-slow
CRH	OID21257	P06850	Oncology	Timepoint:progression_status	FU2 fast - FU2 slow	-2.35633	-4.06717	-0.645497	0.00114894	Significant	FU2-FU2	fast-slow
LEO1	OID30991	Q8WVC0	Neurology_II	Timepoint:progression_status	B fast - FU1 fast	1.27352	0.349008	2.19803	0.00119806	Significant	B-FU1	fast-fast
KRT19	OID20596	P08727	Inflammation	Timepoint:progression_status	FU1 fast - FU2 fast	-2.18368	-3.79692	-0.570444	0.00154065	Significant	FU1-FU2	fast-fast
BGLAP	OID30389	P02818	Cardiometabolic_II	Timepoint:progression_status	FU2 fast - FU2 slow	-1.99546	-3.47272	-0.518197	0.00157265	Significant	FU2-FU2	fast-slow
CHCHD6	OID31426	Q9BRQ6	Oncology_II	Timepoint:progression_status	B fast - FU1 slow	0.932225	0.241004	1.62345	0.00161104	Significant	B-FU1	fast-slow
BGLAP	OID30389	P02818	Cardiometabolic_II	Timepoint:progression_status	FU2 fast - FU3 slow	-2.28507	-3.98685	-0.583297	0.00161468	Significant	FU2-FU3	fast-slow
LEP	OID20187	P41159	Cardiometabolic	Timepoint:progression_status	FU3 fast - FU2 slow	-2.85655	-5.00397	-0.70912	0.00181703	Significant	FU3-FU2	fast-slow
VGF	OID31067	O15240	Neurology_II	Timepoint:progression_status	B fast - B slow	0.567584	0.141342	0.993827	0.0018513	Significant	B-B	fast-slow
VGF	OID31067	O15240	Neurology_II	Timepoint:progression_status	B fast - FU1 fast	0.5624	0.141975	0.982825	0.00186904	Significant	B-FU1	fast-fast
AGR2	OID20896	O95994	Neurology	Timepoint:progression_status	B fast - FU1 slow	2.92191	0.733129	5.1107	0.00189433	Significant	B-FU1	fast-slow
CBX2	OID30177	Q14781	Cardiometabolic_II	Timepoint:progression_status	FU1 fast - FU3 fast	-1.36776	-2.3983	-0.337223	0.00192921	Significant	FU1-FU3	fast-fast
KLK4	OID21391	Q9Y5K2	Oncology	Timepoint:progression_status	FU2 fast - FU3 slow	1.97123	0.489607	3.45286	0.00197294	Significant	FU2-FU3	fast-slow
IL17D	OID20481	Q8TAD2	Inflammation	Timepoint:progression_status	B fast - FU3 fast	-1.61427	-2.83137	-0.397168	0.00204107	Significant	B-FU3	fast-fast
M6PR	OID30208	P20645	Cardiometabolic_II	Timepoint:progression_status	FU2 fast - FU2 slow	0.370793	0.0908056	0.65078	0.00215042	Significant	FU2-FU2	fast-slow
KRT19	OID20596	P08727	Inflammation	Timepoint:progression_status	FU2 slow - FU3 slow	-2.14007	-3.76334	-0.516805	0.00225401	Significant	FU2-FU3	slow-slow
ARAF	OID31260	P10398	Oncology_II	Timepoint:progression_status	B fast - FU3 fast	1.83254	0.440402	3.22467	0.0022827	Significant	B-FU3	fast-fast
GADD45GIP1	OID30237	Q8TAE8	Cardiometabolic_II	Timepoint:progression_status	FU2 fast - FU2 slow	0.737976	0.175333	1.30062	0.00233931	Significant	FU2-FU2	fast-slow
PNMA2	OID30842	Q9UL42	Neurology_II	Timepoint:progression_status	B fast - FU3 fast	-1.35369	-2.39155	-0.315821	0.00243522	Significant	B-FU3	fast-fast
RAB33A	OID30122	Q14088	Cardiometabolic_II	Timepoint:progression_status	FU3 fast - FU3 slow	-1.01009	-1.78486	-0.235323	0.0024507	Significant	FU3-FU3	fast-slow
METAP1D	OID20519	Q6UB28	Inflammation	Timepoint:progression_status	B fast - FU1 fast	1.89182	0.449919	3.33372	0.0024603	Significant	B-FU1	fast-fast
GNE	OID21231	Q9Y223	Oncology	Timepoint:progression_status	B fast - FU3 slow	1.09627	0.255186	1.93735	0.00246165	Significant	B-FU3	fast-slow
PRND	OID31124	Q9UKY0	Neurology_II	Timepoint:progression_status	FU1 fast - FU2 slow	-1.31095	-2.30728	-0.314614	0.00253031	Significant	FU1-FU2	fast-slow
EIF4G3	OID31022	O43432	Neurology_II	Timepoint:progression_status	FU3 fast - FU2 slow	-1.51895	-2.69243	-0.345476	0.00271986	Significant	FU3-FU2	fast-slow
SPINT3	OID31509	P49223	Oncology_II	Timepoint:progression_status	FU1 fast - FU1 slow	-2.10479	-3.70804	-0.50154	0.00287345	Significant	FU1-FU1	fast-slow
VGF	OID31067	O15240	Neurology_II	Timepoint:progression_status	B fast - FU2 slow	0.549886	0.121349	0.978423	0.00316273	Significant	B-FU2	fast-slow
CHCHD6	OID31426	Q9BRQ6	Oncology_II	Timepoint:progression_status	B fast - FU1 fast	0.773467	0.172067	1.37487	0.00324113	Significant	B-FU1	fast-fast
RARRES1	OID21177	P49788	Oncology	Timepoint:progression_status	B fast - FU2 fast	-0.581834	-1.03482	-0.128849	0.00325929	Significant	B-FU2	fast-fast
IL17D	OID20481	Q8TAD2	Inflammation	Timepoint:progression_status	FU1 fast - FU3 fast	-1.56104	-2.77814	-0.343935	0.00328584	Significant	FU1-FU3	fast-fast
CHCHD6	OID31426	Q9BRQ6	Oncology_II	Timepoint:progression_status	FU2 fast - FU1 slow	0.958445	0.206772	1.71012	0.00349246	Significant	FU2-FU1	fast-slow
VGF	OID31067	O15240	Neurology_II	Timepoint:progression_status	B fast - FU3 slow	0.682713	0.145224	1.2202	0.00356219	Significant	B-FU3	fast-slow
BPIFB1	OID20308	Q8TDL5	Cardiometabolic	Timepoint:progression_status	FU2 fast - FU3 fast	1.84444	0.397393	3.29149	0.0036162	Significant	FU2-FU3	fast-fast
SPINT3	OID31509	P49223	Oncology_II	Timepoint:progression_status	FU1 fast - B slow	-2.06765	-3.6709	-0.464399	0.00362055	Significant	FU1-B	fast-slow
NGRN	OID31115	Q9NPE2	Neurology_II	Timepoint:progression_status	FU2 fast - FU1 slow	0.497306	0.105782	0.888829	0.00365032	Significant	FU2-FU1	fast-slow
KLK4	OID21391	Q9Y5K2	Oncology	Timepoint:progression_status	B fast - FU2 slow	1.64974	0.359467	2.94001	0.00387156	Significant	B-FU2	fast-slow
SLC9A3R1	OID30630	O14745	Inflammation_II	Timepoint:progression_status	B fast - FU1 fast	0.95798	0.203476	1.71248	0.00387232	Significant	B-FU1	fast-fast
IL17D	OID20481	Q8TAD2	Inflammation	Timepoint:progression_status	FU3 fast - B slow	1.67916	0.344134	3.01419	0.00407087	Significant	FU3-B	fast-slow
EIF4G3	OID31022	O43432	Neurology_II	Timepoint:progression_status	FU3 fast - FU3 slow	-1.5586	-2.80564	-0.31156	0.00443224	Significant	FU3-FU3	fast-slow
NGRN	OID31115	Q9NPE2	Neurology_II	Timepoint:progression_status	B fast - B slow	0.448648	0.0906976	0.806599	0.00446119	Significant	B-B	fast-slow
PDIA3	OID30573	P30101	Inflammation_II	Timepoint:progression_status	FU2 fast - FU2 slow	0.86934	0.174196	1.56448	0.00451521	Significant	FU2-FU2	fast-slow
KRT19	OID20596	P08727	Inflammation	Timepoint:progression_status	B slow - FU1 slow	1.34934	0.271006	2.42768	0.00468042	Significant	B-FU1	slow-slow
EIF4G3	OID31022	O43432	Neurology_II	Timepoint:progression_status	FU3 fast - FU1 slow	-1.45159	-2.6237	-0.279483	0.00500907	Significant	FU3-FU1	fast-slow
EIF4G3	OID31022	O43432	Neurology_II	Timepoint:progression_status	FU1 fast - FU3 fast	1.46806	0.277554	2.65857	0.0053275	Significant	FU1-FU3	fast-fast
M6PR	OID30208	P20645	Cardiometabolic_II	Timepoint:progression_status	FU2 fast - FU1 slow	0.345383	0.0662136	0.624553	0.0054205	Significant	FU2-FU1	fast-slow
KLK4	OID21391	Q9Y5K2	Oncology	Timepoint:progression_status	B fast - FU3 fast	-2.15645	-3.90237	-0.41053	0.0054575	Significant	B-FU3	fast-fast
INSL3	OID31129	P51460	Neurology_II	Timepoint:progression_status	B fast - FU1 fast	1.1276	0.213784	2.04142	0.005597	Significant	B-FU1	fast-fast
PNMA2	OID30842	Q9UL42	Neurology_II	Timepoint:progression_status	FU3 fast - FU1 slow	1.24942	0.229515	2.26932	0.00577683	Significant	FU3-FU1	fast-slow
PRND	OID31124	Q9UKY0	Neurology_II	Timepoint:progression_status	B fast - FU2 slow	-1.23078	-2.22711	-0.234447	0.00577717	Significant	B-FU2	fast-slow
SPINT3	OID31509	P49223	Oncology_II	Timepoint:progression_status	FU1 fast - FU2 slow	-1.99258	-3.59842	-0.386742	0.00583009	Significant	FU1-FU2	fast-slow
CHCHD6	OID31426	Q9BRQ6	Oncology_II	Timepoint:progression_status	B fast - B slow	0.848877	0.157656	1.5401	0.00587334	Significant	B-B	fast-slow
CBX2	OID30177	Q14781	Cardiometabolic_II	Timepoint:progression_status	B fast - FU3 fast	-1.26063	-2.29117	-0.23009	0.00597369	Significant	B-FU3	fast-fast
KLK4	OID21391	Q9Y5K2	Oncology	Timepoint:progression_status	FU1 fast - FU3 slow	1.75253	0.324044	3.18101	0.00604463	Significant	FU1-FU3	fast-slow
GADD45GIP1	OID30237	Q8TAE8	Cardiometabolic_II	Timepoint:progression_status	B fast - FU1 fast	0.55556	0.102277	1.00884	0.00611294	Significant	B-FU1	fast-fast
SYAP1	OID30636	Q96A49	Inflammation_II	Timepoint:progression_status	FU1 fast - FU2 fast	-0.48889	-0.888709	-0.0890715	0.00621232	Significant	FU1-FU2	fast-fast
EIF4G3	OID31022	O43432	Neurology_II	Timepoint:progression_status	FU3 fast - B slow	-1.42133	-2.59344	-0.249224	0.00658345	Significant	FU3-B	fast-slow
AGER	OID20756	Q15109	Inflammation	Timepoint:progression_status	FU2 slow - FU3 slow	0.701963	0.124754	1.27917	0.00663699	Significant	FU2-FU3	slow-slow
METAP1D	OID20519	Q6UB28	Inflammation	Timepoint:progression_status	FU1 fast - FU2 fast	-1.93964	-3.53446	-0.344817	0.00664461	Significant	FU1-FU2	fast-fast
EIF4G3	OID31022	O43432	Neurology_II	Timepoint:progression_status	FU2 fast - FU3 fast	1.47246	0.257671	2.68724	0.0066636	Significant	FU2-FU3	fast-fast
RAB33A	OID30122	Q14088	Cardiometabolic_II	Timepoint:progression_status	FU3 fast - FU2 slow	-0.882379	-1.61144	-0.153316	0.00674641	Significant	FU3-FU2	fast-slow
DHODH	OID30137	Q02127	Cardiometabolic_II	Timepoint:progression_status	B fast - B slow	0.601479	0.10233	1.10063	0.00723795	Significant	B-B	fast-slow
CHAD	OID30660	O15335	Inflammation_II	Timepoint:progression_status	FU3 fast - FU2 slow	-2.07258	-3.79535	-0.349818	0.00727554	Significant	FU3-FU2	fast-slow
KRT19	OID20596	P08727	Inflammation	Timepoint:progression_status	B fast - FU1 slow	2.41992	0.422012	4.41782	0.00729519	Significant	B-FU1	fast-slow
BPIFB1	OID20308	Q8TDL5	Cardiometabolic	Timepoint:progression_status	FU3 fast - FU2 slow	-2.02471	-3.71333	-0.336094	0.00759414	Significant	FU3-FU2	fast-slow
KRT19	OID20596	P08727	Inflammation	Timepoint:progression_status	FU2 fast - FU1 slow	2.55911	0.433629	4.6846	0.0076151	Significant	FU2-FU1	fast-slow
RARRES1	OID21177	P49788	Oncology	Timepoint:progression_status	FU1 fast - FU2 fast	-0.544707	-0.997692	-0.0917226	0.00764393	Significant	FU1-FU2	fast-fast
CHCHD6	OID31426	Q9BRQ6	Oncology_II	Timepoint:progression_status	FU1 fast - FU2 fast	-0.799687	-1.46573	-0.133641	0.00777748	Significant	FU1-FU2	fast-fast
DHODH	OID30137	Q02127	Cardiometabolic_II	Timepoint:progression_status	B fast - FU2 fast	0.660948	0.110298	1.2116	0.00783611	Significant	B-FU2	fast-fast
LEO1	OID30991	Q8WVC0	Neurology_II	Timepoint:progression_status	FU2 fast - FU2 slow	1.59511	0.258833	2.93139	0.00840628	Significant	FU2-FU2	fast-slow
PRND	OID31124	Q9UKY0	Neurology_II	Timepoint:progression_status	FU3 fast - FU2 slow	-2.02418	-3.73525	-0.31312	0.00895369	Significant	FU3-FU2	fast-slow
GNE	OID21231	Q9Y223	Oncology	Timepoint:progression_status	B fast - FU1 slow	0.772654	0.118956	1.42635	0.00906276	Significant	B-FU1	fast-slow
M6PR	OID30208	P20645	Cardiometabolic_II	Timepoint:progression_status	FU2 fast - B slow	0.330535	0.0513654	0.609704	0.00927532	Significant	FU2-B	fast-slow
UPB1	OID30352	Q9UBR1	Cardiometabolic_II	Timepoint:progression_status	FU2 fast - FU2 slow	-1.85449	-3.42659	-0.282397	0.00935727	Significant	FU2-FU2	fast-slow
RARRES1	OID21177	P49788	Oncology	Timepoint:progression_status	FU1 slow - FU3 slow	-0.533775	-0.988141	-0.0794082	0.0100503	Significant	FU1-FU3	slow-slow
M6PR	OID30208	P20645	Cardiometabolic_II	Timepoint:progression_status	FU1 fast - FU2 fast	-0.250215	-0.463467	-0.0369622	0.0102412	Significant	FU1-FU2	fast-fast
PDIA3	OID30573	P30101	Inflammation_II	Timepoint:progression_status	FU1 fast - FU2 fast	-0.735808	-1.36344	-0.108173	0.0103244	Significant	FU1-FU2	fast-fast
RAB33A	OID30122	Q14088	Cardiometabolic_II	Timepoint:progression_status	FU3 fast - B slow	-0.848422	-1.57663	-0.120209	0.0107344	Significant	FU3-B	fast-slow
CHCHD6	OID31426	Q9BRQ6	Oncology_II	Timepoint:progression_status	FU2 fast - B slow	0.875097	0.123424	1.62677	0.0110239	Significant	FU2-B	fast-slow
AGER	OID20756	Q15109	Inflammation	Timepoint:progression_status	FU2 fast - FU2 slow	-0.873842	-1.62405	-0.123631	0.0111861	Significant	FU2-FU2	fast-slow
CBX2	OID30177	Q14781	Cardiometabolic_II	Timepoint:progression_status	FU2 fast - FU3 fast	-1.21689	-2.26488	-0.168902	0.0112914	Significant	FU2-FU3	fast-fast
AGR2	OID20896	O95994	Neurology	Timepoint:progression_status	FU1 fast - FU2 fast	-2.39859	-4.46216	-0.335016	0.0113872	Significant	FU1-FU2	fast-fast
RBM17	OID31034	Q96I25	Neurology_II	Timepoint:progression_status	FU2 fast - FU3 fast	-1.92264	-3.58069	-0.264585	0.0114572	Significant	FU2-FU3	fast-fast
RARRES1	OID21177	P49788	Oncology	Timepoint:progression_status	FU1 fast - FU1 slow	0.640689	0.0892746	1.1921	0.0117199	Significant	FU1-FU1	fast-slow
GADD45GIP1	OID30237	Q8TAE8	Cardiometabolic_II	Timepoint:progression_status	FU2 fast - B slow	0.648308	0.0878268	1.20879	0.0118704	Significant	FU2-B	fast-slow
NGRN	OID31115	Q9NPE2	Neurology_II	Timepoint:progression_status	FU2 fast - FU2 slow	0.454154	0.0610505	0.847258	0.0119856	Significant	FU2-FU2	fast-slow
ARAF	OID31260	P10398	Oncology_II	Timepoint:progression_status	FU2 fast - FU3 fast	1.62625	0.218721	3.03378	0.0121542	Significant	FU2-FU3	fast-fast
CBX2	OID30177	Q14781	Cardiometabolic_II	Timepoint:progression_status	FU3 fast - FU2 slow	1.19029	0.157545	2.22304	0.0121881	Significant	FU3-FU2	fast-slow
UPB1	OID30352	Q9UBR1	Cardiometabolic_II	Timepoint:progression_status	FU1 fast - FU2 slow	-1.64854	-3.08015	-0.216922	0.0124872	Significant	FU1-FU2	fast-slow
M6PR	OID30208	P20645	Cardiometabolic_II	Timepoint:progression_status	B fast - FU2 fast	-0.245428	-0.45868	-0.0321755	0.0127559	Significant	B-FU2	fast-fast
SYAP1	OID30636	Q96A49	Inflammation_II	Timepoint:progression_status	FU2 fast - FU2 slow	0.506706	0.0655962	0.947816	0.0128055	Significant	FU2-FU2	fast-slow
CBX2	OID30177	Q14781	Cardiometabolic_II	Timepoint:progression_status	FU3 fast - B slow	1.18299	0.151451	2.21453	0.0129016	Significant	FU3-B	fast-slow
PDIA3	OID30573	P30101	Inflammation_II	Timepoint:progression_status	FU2 fast - FU1 slow	0.791596	0.0991808	1.48401	0.0135214	Significant	FU2-FU1	fast-slow
VGF	OID31067	O15240	Neurology_II	Timepoint:progression_status	B fast - FU2 fast	0.528677	0.0667531	0.990602	0.0135425	Significant	B-FU2	fast-fast
IL17D	OID20481	Q8TAD2	Inflammation	Timepoint:progression_status	FU3 fast - FU3 slow	1.6047	0.197368	3.01203	0.0137632	Significant	FU3-FU3	fast-slow
PNMA2	OID30842	Q9UL42	Neurology_II	Timepoint:progression_status	FU1 fast - FU3 fast	-1.17867	-2.21653	-0.140801	0.0143836	Significant	FU1-FU3	fast-fast
CBX2	OID30177	Q14781	Cardiometabolic_II	Timepoint:progression_status	FU3 fast - FU1 slow	1.16979	0.138251	2.20133	0.0146347	Significant	FU3-FU1	fast-slow
INSL3	OID31129	P51460	Neurology_II	Timepoint:progression_status	FU1 fast - FU1 slow	-2.11894	-3.97335	-0.264532	0.0147376	Significant	FU1-FU1	fast-slow
ARAF	OID31260	P10398	Oncology_II	Timepoint:progression_status	FU3 fast - B slow	-1.7456	-3.28765	-0.20355	0.0149118	Significant	FU3-B	fast-slow
KLK4	OID21391	Q9Y5K2	Oncology	Timepoint:progression_status	B fast - B slow	1.46328	0.175874	2.75069	0.0152672	Significant	B-B	fast-slow
RAB33A	OID30122	Q14088	Cardiometabolic_II	Timepoint:progression_status	FU3 fast - FU1 slow	-0.822007	-1.55022	-0.0937946	0.015383	Significant	FU3-FU1	fast-slow
RAB33A	OID30122	Q14088	Cardiometabolic_II	Timepoint:progression_status	FU1 fast - FU3 fast	0.835227	0.0941883	1.57627	0.0156398	Significant	FU1-FU3	fast-fast
ARAF	OID31260	P10398	Oncology_II	Timepoint:progression_status	FU3 fast - FU1 slow	-1.71328	-3.25533	-0.171235	0.0182694	Significant	FU3-FU1	fast-slow
IL17D	OID20481	Q8TAD2	Inflammation	Timepoint:progression_status	FU3 fast - FU1 slow	1.48316	0.148137	2.81819	0.0182863	Significant	FU3-FU1	fast-slow
PNMA2	OID30842	Q9UL42	Neurology_II	Timepoint:progression_status	FU3 fast - FU2 slow	1.13405	0.112954	2.15514	0.0183416	Significant	FU3-FU2	fast-slow
NGRN	OID31115	Q9NPE2	Neurology_II	Timepoint:progression_status	B fast - FU3 slow	0.490697	0.0489555	0.932438	0.0183461	Significant	B-FU3	fast-slow
MME	OID21307	P08473	Oncology	Timepoint:progression_status	B fast - FU2 fast	1.12012	0.111743	2.12849	0.0187119	Significant	B-FU2	fast-fast
CRH	OID21257	P06850	Oncology	Timepoint:progression_status	FU1 slow - FU2 slow	-1.07282	-2.0409	-0.104741	0.0192085	Significant	FU1-FU2	slow-slow
AGR2	OID20896	O95994	Neurology	Timepoint:progression_status	B fast - FU1 fast	2.05259	0.191345	3.91383	0.020188	Significant	B-FU1	fast-fast
PRND	OID31124	Q9UKY0	Neurology_II	Timepoint:progression_status	FU1 slow - FU3 slow	-0.851062	-1.62584	-0.0762795	0.020948	Significant	FU1-FU3	slow-slow
RBM17	OID31034	Q96I25	Neurology_II	Timepoint:progression_status	FU1 fast - FU2 fast	-0.923166	-1.76375	-0.0825842	0.0209519	Significant	FU1-FU2	fast-fast
RARRES1	OID21177	P49788	Oncology	Timepoint:progression_status	FU3 fast - FU1 slow	1.07796	0.0931341	2.06278	0.0213816	Significant	FU3-FU1	fast-slow
PNMA2	OID30842	Q9UL42	Neurology_II	Timepoint:progression_status	FU3 fast - B slow	1.11474	0.0948371	2.13464	0.0216911	Significant	FU3-B	fast-slow
RARRES1	OID21177	P49788	Oncology	Timepoint:progression_status	B fast - FU1 slow	0.603562	0.0521479	1.15498	0.0219881	Significant	B-FU1	fast-slow
CHAD	OID30660	O15335	Inflammation_II	Timepoint:progression_status	FU1 slow - FU2 slow	-0.54815	-1.05058	-0.0457206	0.0225143	Significant	FU1-FU2	slow-slow
PNMA2	OID30842	Q9UL42	Neurology_II	Timepoint:progression_status	FU3 fast - FU3 slow	1.18044	0.0953341	2.26555	0.0227633	Significant	FU3-FU3	fast-slow
VGF	OID31067	O15240	Neurology_II	Timepoint:progression_status	B fast - FU1 slow	0.46224	0.0359971	0.888482	0.0236319	Significant	B-FU1	fast-slow
BGLAP	OID30389	P02818	Cardiometabolic_II	Timepoint:progression_status	FU3 fast - FU3 slow	-2.88099	-5.54305	-0.218924	0.0240182	Significant	FU3-FU3	fast-slow
CHAD	OID30660	O15335	Inflammation_II	Timepoint:progression_status	FU2 fast - FU2 slow	-1.22237	-2.3528	-0.0919443	0.0248368	Significant	FU2-FU2	fast-slow
ARAF	OID31260	P10398	Oncology_II	Timepoint:progression_status	FU3 fast - FU2 slow	-1.66473	-3.2084	-0.121062	0.024861	Significant	FU3-FU2	fast-slow
INSL3	OID31129	P51460	Neurology_II	Timepoint:progression_status	FU1 fast - B slow	-2.00928	-3.86369	-0.154873	0.0248861	Significant	FU1-B	fast-slow
KLK4	OID21391	Q9Y5K2	Oncology	Timepoint:progression_status	B fast - FU2 fast	-0.921674	-1.77967	-0.0636748	0.0261877	Significant	B-FU2	fast-fast
AKR7L	OID30488	Q8NHP1	Inflammation_II	Timepoint:progression_status	B fast - FU1 fast	0.871047	0.0595909	1.6825	0.0263771	Significant	B-FU1	fast-fast
GNE	OID21231	Q9Y223	Oncology	Timepoint:progression_status	B fast - FU2 slow	0.703621	0.0460614	1.36118	0.0268802	Significant	B-FU2	fast-slow
BGLAP	OID30389	P02818	Cardiometabolic_II	Timepoint:progression_status	B slow - FU2 slow	-0.845142	-1.63983	-0.0504537	0.0288551	Significant	B-FU2	slow-slow
CPM	OID21054	P14384	Neurology	Timepoint:progression_status	FU1 slow - FU2 slow	-0.425864	-0.826993	-0.0247342	0.0293466	Significant	FU1-FU2	slow-slow
ARAF	OID31260	P10398	Oncology_II	Timepoint:progression_status	FU3 fast - FU3 slow	-1.71343	-3.33741	-0.0894565	0.0308064	Significant	FU3-FU3	fast-slow
IL6	OID21276	P05231	Oncology	Timepoint:progression_status	B fast - FU1 slow	1.59696	0.0839626	3.10996	0.0311302	Significant	B-FU1	fast-slow
AGR2	OID20896	O95994	Neurology	Timepoint:progression_status	B slow - FU1 slow	1.4562	0.068912	2.84349	0.0326412	Significant	B-FU1	slow-slow
RAB33A	OID30122	Q14088	Cardiometabolic_II	Timepoint:progression_status	B fast - FU3 fast	0.774067	0.0330283	1.51511	0.0338629	Significant	B-FU3	fast-fast
PDIA3	OID30573	P30101	Inflammation_II	Timepoint:progression_status	B slow - FU2 slow	0.447325	0.0193618	0.875288	0.033941	Significant	B-FU2	slow-slow
BPIFB1	OID20308	Q8TDL5	Cardiometabolic	Timepoint:progression_status	FU2 slow - FU3 slow	0.739326	0.0296615	1.44899	0.0349462	Significant	FU2-FU3	slow-slow
UPB1	OID30352	Q9UBR1	Cardiometabolic_II	Timepoint:progression_status	B slow - FU1 slow	-1.04813	-2.05527	-0.0409868	0.0353207	Significant	B-FU1	slow-slow
KLK4	OID21391	Q9Y5K2	Oncology	Timepoint:progression_status	B fast - FU1 slow	1.34083	0.0534183	2.62824	0.0354122	Significant	B-FU1	fast-slow
CRH	OID21257	P06850	Oncology	Timepoint:progression_status	FU1 fast - FU2 slow	-1.65125	-3.23923	-0.0632678	0.0356122	Significant	FU1-FU2	fast-slow
SYAP1	OID30636	Q96A49	Inflammation_II	Timepoint:progression_status	B fast - FU1 fast	0.375393	0.0137564	0.73703	0.0361509	Significant	B-FU1	fast-fast
RARRES1	OID21177	P49788	Oncology	Timepoint:progression_status	FU1 fast - FU2 slow	0.572886	0.0196224	1.12615	0.0370678	Significant	FU1-FU2	fast-slow
IL6	OID20911	P05231	Neurology	Timepoint:progression_status	FU2 fast - FU3 slow	1.93972	0.0625219	3.81692	0.0374977	Significant	FU2-FU3	fast-slow
IL6	OID20911	P05231	Neurology	Timepoint:progression_status	B fast - FU2 fast	-1.3204	-2.60261	-0.0381897	0.0388004	Significant	B-FU2	fast-fast
BGLAP	OID30389	P02818	Cardiometabolic_II	Timepoint:progression_status	FU3 fast - FU2 slow	-2.59137	-5.11197	-0.0707815	0.0392133	Significant	FU3-FU2	fast-slow
IL6	OID21276	P05231	Oncology	Timepoint:progression_status	B fast - FU2 fast	-1.31879	-2.6039	-0.0336736	0.0400181	Significant	B-FU2	fast-fast
GADD45GIP1	OID30237	Q8TAE8	Cardiometabolic_II	Timepoint:progression_status	B fast - FU1 slow	0.528049	0.0133354	1.04276	0.0401082	Significant	B-FU1	fast-slow
RARRES1	OID21177	P49788	Oncology	Timepoint:progression_status	FU3 fast - FU2 slow	1.01016	0.0242466	1.99607	0.0404305	Significant	FU3-FU2	fast-slow
RARRES1	OID21177	P49788	Oncology	Timepoint:progression_status	FU2 slow - FU3 slow	-0.465972	-0.921631	-0.0103127	0.0412516	Significant	FU2-FU3	slow-slow
CHCHD6	OID31426	Q9BRQ6	Oncology_II	Timepoint:progression_status	B fast - FU3 slow	0.859607	0.0179441	1.70127	0.0416226	Significant	B-FU3	fast-slow
M6PR	OID30208	P20645	Cardiometabolic_II	Timepoint:progression_status	FU2 fast - FU3 slow	0.325224	0.00585933	0.644588	0.0427373	Significant	FU2-FU3	fast-slow
FABP9	OID20501	Q0Z7S8	Inflammation	Timepoint:progression_status	FU1 fast - FU2 slow	-0.812432	-1.61058	-0.0142885	0.0432559	Significant	FU1-FU2	fast-slow
SPTBN2	OID30876	O15020	Neurology_II	Timepoint:progression_status	B fast - B slow	0.583608	0.00944874	1.15777	0.0434028	Significant	B-B	fast-slow
DHODH	OID30137	Q02127	Cardiometabolic_II	Timepoint:progression_status	B fast - FU3 slow	0.641204	0.00888478	1.27352	0.0443181	Significant	B-FU3	fast-slow
METAP1D	OID20519	Q6UB28	Inflammation	Timepoint:progression_status	B fast - FU2 slow	1.64478	0.0201383	3.26942	0.045021	Significant	B-FU2	fast-slow
AGR2	OID20896	O95994	Neurology	Timepoint:progression_status	FU1 slow - FU3 slow	-2.0843	-4.14479	-0.0238075	0.0453439	Significant	FU1-FU3	slow-slow
IL6	OID20911	P05231	Neurology	Timepoint:progression_status	B fast - FU1 slow	1.52995	0.00565355	3.05426	0.0484845	Significant	B-FU1	fast-slow
PDIA3	OID30573	P30101	Inflammation_II	Timepoint:progression_status	FU2 fast - FU3 slow	0.82893	0.00193479	1.65592	0.0490133	Significant	FU2-FU3	fast-slow
NGRN	OID31115	Q9NPE2	Neurology_II	Timepoint:progression_status	FU2 fast - B slow	0.391991	0.000467546	0.783514	0.049497	Significant	FU2-B	fast-slow
CHAD	OID30660	O15335	Inflammation_II	Timepoint:progression_status	B fast - FU2 slow	-1.07916	-2.15859	0.000277289	0.0501048	Non-significant	B-FU2	fast-slow
MME	OID21307	P08473	Oncology	Timepoint:progression_status	B fast - FU1 fast	0.901907	-0.00105269	1.80487	0.0504885	Non-significant	B-FU1	fast-fast
METAP1D	OID20519	Q6UB28	Inflammation	Timepoint:progression_status	B fast - B slow	1.60703	-0.010066	3.22414	0.0526736	Non-significant	B-B	fast-slow
CHCHD6	OID31426	Q9BRQ6	Oncology_II	Timepoint:progression_status	FU2 fast - FU3 slow	0.885827	-0.00672478	1.77838	0.0532931	Non-significant	FU2-FU3	fast-slow
LEP	OID20187	P41159	Cardiometabolic	Timepoint:progression_status	B fast - FU2 slow	-1.2912	-2.59907	0.0166619	0.0554593	Non-significant	B-FU2	fast-slow
IL17D	OID20481	Q8TAD2	Inflammation	Timepoint:progression_status	B slow - FU2 slow	-0.400497	-0.806642	0.00564719	0.0561146	Non-significant	B-FU2	slow-slow
LEO1	OID30991	Q8WVC0	Neurology_II	Timepoint:progression_status	FU2 fast - FU1 slow	1.30533	-0.0269637	2.63762	0.0590912	Non-significant	FU2-FU1	fast-slow
BPIFB1	OID20308	Q8TDL5	Cardiometabolic	Timepoint:progression_status	B fast - FU3 fast	1.40051	-0.0319299	2.83295	0.0601262	Non-significant	B-FU3	fast-fast
LEO1	OID30991	Q8WVC0	Neurology_II	Timepoint:progression_status	B fast - FU2 slow	1.22393	-0.0296384	2.4775	0.0606374	Non-significant	B-FU2	fast-slow
PNMA2	OID30842	Q9UL42	Neurology_II	Timepoint:progression_status	FU2 fast - FU3 fast	-1.03375	-2.09314	0.0256349	0.0612581	Non-significant	FU2-FU3	fast-fast
IL6	OID21276	P05231	Oncology	Timepoint:progression_status	B fast - FU2 slow	1.47733	-0.041063	2.99572	0.0623607	Non-significant	B-FU2	fast-slow
SYAP1	OID30636	Q96A49	Inflammation_II	Timepoint:progression_status	B fast - FU2 slow	0.393209	-0.0111195	0.797538	0.0627716	Non-significant	B-FU2	fast-slow
RARRES1	OID21177	P49788	Oncology	Timepoint:progression_status	B fast - FU2 slow	0.535759	-0.0175043	1.08902	0.0646703	Non-significant	B-FU2	fast-slow
CHAD	OID30660	O15335	Inflammation_II	Timepoint:progression_status	FU3 fast - FU3 slow	-1.74891	-3.55669	0.0588742	0.0656202	Non-significant	FU3-FU3	fast-slow
IL6	OID20911	P05231	Neurology	Timepoint:progression_status	B fast - FU2 slow	1.47829	-0.051346	3.00793	0.0656895	Non-significant	B-FU2	fast-slow
RARRES1	OID21177	P49788	Oncology	Timepoint:progression_status	FU2 fast - FU3 slow	0.651621	-0.0223863	1.32563	0.065869	Non-significant	FU2-FU3	fast-slow
BGLAP	OID30389	P02818	Cardiometabolic_II	Timepoint:progression_status	B slow - FU3 slow	-1.13476	-2.30953	0.0400166	0.0661769	Non-significant	B-FU3	slow-slow
LEP	OID20187	P41159	Cardiometabolic	Timepoint:progression_status	B fast - FU1 fast	0.812393	-0.0317074	1.65649	0.0679696	Non-significant	B-FU1	fast-fast
IL6	OID21276	P05231	Oncology	Timepoint:progression_status	FU2 fast - FU3 slow	1.79801	-0.071375	3.66739	0.0685947	Non-significant	FU2-FU3	fast-slow
LEP	OID20187	P41159	Cardiometabolic	Timepoint:progression_status	FU2 slow - FU3 slow	0.911585	-0.0397339	1.8629	0.0703464	Non-significant	FU2-FU3	slow-slow
KRT19	OID20596	P08727	Inflammation	Timepoint:progression_status	FU1 slow - FU3 slow	-1.54781	-3.16652	0.0708985	0.0715051	Non-significant	FU1-FU3	slow-slow
IL17D	OID20481	Q8TAD2	Inflammation	Timepoint:progression_status	FU3 fast - FU2 slow	1.27866	-0.0577902	2.61511	0.0715577	Non-significant	FU3-FU2	fast-slow
METAP1D	OID20519	Q6UB28	Inflammation	Timepoint:progression_status	FU2 fast - FU2 slow	1.6926	-0.0781502	3.46335	0.0718961	Non-significant	FU2-FU2	fast-slow
GADD45GIP1	OID30237	Q8TAE8	Cardiometabolic_II	Timepoint:progression_status	B fast - FU2 slow	0.492825	-0.0242372	1.00989	0.07329	Non-significant	B-FU2	fast-slow
SPINT3	OID31509	P49223	Oncology_II	Timepoint:progression_status	FU1 fast - FU2 fast	-0.868755	-1.7807	0.043194	0.0734971	Non-significant	FU1-FU2	fast-fast
GADD45GIP1	OID30237	Q8TAE8	Cardiometabolic_II	Timepoint:progression_status	FU2 fast - FU3 slow	0.63481	-0.0323232	1.30194	0.0745821	Non-significant	FU2-FU3	fast-slow
IL17D	OID20481	Q8TAD2	Inflammation	Timepoint:progression_status	FU2 fast - FU3 fast	-1.17024	-2.40105	0.0605813	0.0746896	Non-significant	FU2-FU3	fast-fast
SPTBN2	OID30876	O15020	Neurology_II	Timepoint:progression_status	B fast - FU1 fast	0.598567	-0.0339819	1.23112	0.0772831	Non-significant	B-FU1	fast-fast
INSL3	OID31129	P51460	Neurology_II	Timepoint:progression_status	FU1 fast - FU2 slow	-1.75141	-3.60864	0.105815	0.0779884	Non-significant	FU1-FU2	fast-slow
SYAP1	OID30636	Q96A49	Inflammation_II	Timepoint:progression_status	FU2 fast - FU1 slow	0.414668	-0.0247006	0.854036	0.0791406	Non-significant	FU2-FU1	fast-slow
AGR2	OID20896	O95994	Neurology	Timepoint:progression_status	FU3 fast - FU2 slow	4.04739	-0.244313	8.33909	0.0797839	Non-significant	FU3-FU2	fast-slow
LEP	OID20187	P41159	Cardiometabolic	Timepoint:progression_status	B fast - FU2 fast	0.888213	-0.0556084	1.83203	0.0804916	Non-significant	B-FU2	fast-fast
BPIFB1	OID20308	Q8TDL5	Cardiometabolic	Timepoint:progression_status	FU1 fast - FU2 fast	-0.660745	-1.3639	0.0424094	0.0813605	Non-significant	FU1-FU2	fast-fast
PRND	OID31124	Q9UKY0	Neurology_II	Timepoint:progression_status	FU2 fast - B slow	0.988079	-0.0642761	2.04043	0.0816318	Non-significant	FU2-B	fast-slow
UPB1	OID30352	Q9UBR1	Cardiometabolic_II	Timepoint:progression_status	FU2 fast - FU1 slow	-1.47037	-3.03585	0.0951109	0.0821077	Non-significant	FU2-FU1	fast-slow
METAP1D	OID20519	Q6UB28	Inflammation	Timepoint:progression_status	FU2 fast - B slow	1.65486	-0.10897	3.41868	0.0826564	Non-significant	FU2-B	fast-slow
FABP9	OID20501	Q0Z7S8	Inflammation	Timepoint:progression_status	FU1 fast - FU1 slow	-0.744481	-1.54155	0.0525883	0.0833527	Non-significant	FU1-FU1	fast-slow
CPM	OID21054	P14384	Neurology	Timepoint:progression_status	FU3 fast - FU2 slow	-1.19163	-2.46925	0.0860008	0.0865868	Non-significant	FU3-FU2	fast-slow
BGLAP	OID30389	P02818	Cardiometabolic_II	Timepoint:progression_status	B fast - FU3 slow	-1.49929	-3.11579	0.11722	0.0898678	Non-significant	B-FU3	fast-slow
IL6	OID21276	P05231	Oncology	Timepoint:progression_status	B fast - B slow	1.39871	-0.114286	2.91171	0.0910192	Non-significant	B-B	fast-slow
NGRN	OID31115	Q9NPE2	Neurology_II	Timepoint:progression_status	FU2 fast - FU3 slow	0.43404	-0.0355412	0.90362	0.0923831	Non-significant	FU2-FU3	fast-slow
GNE	OID21231	Q9Y223	Oncology	Timepoint:progression_status	B fast - FU2 fast	0.711479	-0.0634055	1.48636	0.095972	Non-significant	B-FU2	fast-fast
KLK4	OID21391	Q9Y5K2	Oncology	Timepoint:progression_status	B fast - FU1 fast	-0.702967	-1.46912	0.0631868	0.0963317	Non-significant	B-FU1	fast-fast
BGLAP	OID30389	P02818	Cardiometabolic_II	Timepoint:progression_status	FU1 fast - FU3 slow	-1.47865	-3.09515	0.13786	0.0990679	Non-significant	FU1-FU3	fast-slow
CHAD	OID30660	O15335	Inflammation_II	Timepoint:progression_status	FU1 fast - FU3 fast	1.38217	-0.131411	2.89574	0.0997026	Non-significant	FU1-FU3	fast-fast
SPINT3	OID31509	P49223	Oncology_II	Timepoint:progression_status	FU1 fast - FU3 slow	-1.57861	-3.31001	0.152794	0.0998271	Non-significant	FU1-FU3	fast-slow
SLC9A3R1	OID30630	O14745	Inflammation_II	Timepoint:progression_status	FU1 fast - FU2 fast	-0.75496	-1.58523	0.0753085	0.102634	Non-significant	FU1-FU2	fast-fast
IL6	OID20911	P05231	Neurology	Timepoint:progression_status	B fast - B slow	1.3843	-0.140006	2.9086	0.102765	Non-significant	B-B	fast-slow
RARRES1	OID21177	P49788	Oncology	Timepoint:progression_status	FU3 fast - B slow	0.885848	-0.098977	1.87067	0.111483	Non-significant	FU3-B	fast-slow
LEP	OID20187	P41159	Cardiometabolic	Timepoint:progression_status	FU2 fast - FU1 slow	-1.22893	-2.60114	0.143276	0.112656	Non-significant	FU2-FU1	fast-slow
GNE	OID21231	Q9Y223	Oncology	Timepoint:progression_status	B fast - FU1 fast	0.637053	-0.0753874	1.34949	0.114186	Non-significant	B-FU1	fast-fast
METAP1D	OID20519	Q6UB28	Inflammation	Timepoint:progression_status	B fast - FU1 slow	1.43621	-0.180896	3.05331	0.120062	Non-significant	B-FU1	fast-slow
UPB1	OID30352	Q9UBR1	Cardiometabolic_II	Timepoint:progression_status	FU1 fast - FU1 slow	-1.26441	-2.68874	0.159912	0.120853	Non-significant	FU1-FU1	fast-slow
LEP	OID20187	P41159	Cardiometabolic	Timepoint:progression_status	FU3 fast - FU1 slow	-1.90606	-4.05128	0.239151	0.120914	Non-significant	FU3-FU1	fast-slow
LEP	OID20187	P41159	Cardiometabolic	Timepoint:progression_status	FU1 fast - FU1 slow	-1.15311	-2.45756	0.151342	0.121463	Non-significant	FU1-FU1	fast-slow
SLC9A3R1	OID30630	O14745	Inflammation_II	Timepoint:progression_status	B fast - B slow	0.692173	-0.0883772	1.47272	0.121786	Non-significant	B-B	fast-slow
BGLAP	OID30389	P02818	Cardiometabolic_II	Timepoint:progression_status	FU2 fast - FU1 slow	-1.30378	-2.77638	0.168814	0.122318	Non-significant	FU2-FU1	fast-slow
RAB33A	OID30122	Q14088	Cardiometabolic_II	Timepoint:progression_status	FU2 fast - FU3 fast	0.670812	-0.0855943	1.42722	0.122404	Non-significant	FU2-FU3	fast-fast
CHAD	OID30660	O15335	Inflammation_II	Timepoint:progression_status	FU3 fast - FU1 slow	-1.52443	-3.24547	0.196606	0.123366	Non-significant	FU3-FU1	fast-slow
UPB1	OID30352	Q9UBR1	Cardiometabolic_II	Timepoint:progression_status	FU3 fast - FU2 slow	-2.64053	-5.62619	0.345136	0.124467	Non-significant	FU3-FU2	fast-slow
FABP9	OID20501	Q0Z7S8	Inflammation	Timepoint:progression_status	FU2 fast - FU2 slow	-0.718573	-1.53826	0.101115	0.126984	Non-significant	FU2-FU2	fast-slow
BGLAP	OID30389	P02818	Cardiometabolic_II	Timepoint:progression_status	B fast - FU2 slow	-1.20967	-2.58981	0.170459	0.129471	Non-significant	B-FU2	fast-slow
PDIA3	OID30573	P30101	Inflammation_II	Timepoint:progression_status	B slow - FU1 slow	0.369581	-0.0534463	0.792609	0.132563	Non-significant	B-FU1	slow-slow
SYAP1	OID30636	Q96A49	Inflammation_II	Timepoint:progression_status	FU2 fast - B slow	0.384372	-0.0549969	0.82374	0.132736	Non-significant	FU2-B	fast-slow
AKR7L	OID30488	Q8NHP1	Inflammation_II	Timepoint:progression_status	B fast - FU2 fast	0.779789	-0.11321	1.67279	0.133596	Non-significant	B-FU2	fast-fast
BGLAP	OID30389	P02818	Cardiometabolic_II	Timepoint:progression_status	FU1 slow - FU2 slow	-0.691675	-1.48636	0.103013	0.135857	Non-significant	FU1-FU2	slow-slow
AGR2	OID20896	O95994	Neurology	Timepoint:progression_status	FU1 fast - FU2 slow	1.91121	-0.287026	4.10945	0.136874	Non-significant	FU1-FU2	fast-slow
IL6	OID21276	P05231	Oncology	Timepoint:progression_status	FU1 slow - FU3 slow	-1.11774	-2.40567	0.170195	0.138616	Non-significant	FU1-FU3	slow-slow
INSL3	OID31129	P51460	Neurology_II	Timepoint:progression_status	FU1 fast - FU2 fast	-0.888661	-1.91456	0.13724	0.139813	Non-significant	FU1-FU2	fast-fast
BGLAP	OID30389	P02818	Cardiometabolic_II	Timepoint:progression_status	FU1 fast - FU2 slow	-1.18903	-2.56917	0.191099	0.143727	Non-significant	FU1-FU2	fast-slow
CPM	OID21054	P14384	Neurology	Timepoint:progression_status	B slow - FU3 slow	-0.511698	-1.10505	0.0816519	0.143991	Non-significant	B-FU3	slow-slow
LEP	OID20187	P41159	Cardiometabolic	Timepoint:progression_status	FU3 fast - FU3 slow	-1.94496	-4.20177	0.311848	0.146304	Non-significant	FU3-FU3	fast-slow
LEO1	OID30991	Q8WVC0	Neurology_II	Timepoint:progression_status	B slow - FU2 slow	0.599482	-0.0983414	1.29731	0.146795	Non-significant	B-FU2	slow-slow
PGF	OID20673	P49763	Inflammation	Timepoint:progression_status	FU2 fast - B slow	0.582778	-0.0992047	1.26476	0.150382	Non-significant	FU2-B	fast-slow
IL6	OID21276	P05231	Oncology	Timepoint:progression_status	FU3 fast - FU1 slow	2.35844	-0.403949	5.12084	0.154641	Non-significant	FU3-FU1	fast-slow
DHODH	OID30137	Q02127	Cardiometabolic_II	Timepoint:progression_status	B fast - FU2 slow	0.427292	-0.0746023	0.929186	0.156615	Non-significant	B-FU2	fast-slow
BPIFB1	OID20308	Q8TDL5	Cardiometabolic	Timepoint:progression_status	FU2 fast - B slow	0.970142	-0.187543	2.12783	0.166748	Non-significant	FU2-B	fast-slow
METAP1D	OID20519	Q6UB28	Inflammation	Timepoint:progression_status	FU2 fast - FU1 slow	1.48403	-0.2798	3.24785	0.167267	Non-significant	FU2-FU1	fast-slow
PRND	OID31124	Q9UKY0	Neurology_II	Timepoint:progression_status	FU3 fast - FU3 slow	-1.51601	-3.31829	0.286279	0.168535	Non-significant	FU3-FU3	fast-slow
AKR7L	OID30488	Q8NHP1	Inflammation_II	Timepoint:progression_status	B fast - B slow	0.702945	-0.135104	1.54099	0.170367	Non-significant	B-B	fast-slow
BGLAP	OID30389	P02818	Cardiometabolic_II	Timepoint:progression_status	FU1 slow - FU3 slow	-0.981288	-2.15606	0.193483	0.173199	Non-significant	FU1-FU3	slow-slow
KLK4	OID21391	Q9Y5K2	Oncology	Timepoint:progression_status	FU1 fast - FU3 fast	-1.45348	-3.19941	0.292436	0.176236	Non-significant	FU1-FU3	fast-fast
FABP9	OID20501	Q0Z7S8	Inflammation	Timepoint:progression_status	FU1 fast - B slow	-0.658496	-1.45556	0.138574	0.176554	Non-significant	FU1-B	fast-slow
LEP	OID20187	P41159	Cardiometabolic	Timepoint:progression_status	FU3 fast - B slow	-1.78546	-3.93067	0.359755	0.178925	Non-significant	FU3-B	fast-slow
BPIFB1	OID20308	Q8TDL5	Cardiometabolic	Timepoint:progression_status	FU1 fast - FU3 fast	1.1837	-0.248743	2.61614	0.183425	Non-significant	FU1-FU3	fast-fast
LEP	OID20187	P41159	Cardiometabolic	Timepoint:progression_status	FU2 fast - FU3 slow	-1.26783	-2.80194	0.266281	0.184056	Non-significant	FU2-FU3	fast-slow
DHODH	OID30137	Q02127	Cardiometabolic_II	Timepoint:progression_status	B fast - FU1 slow	0.411568	-0.0875814	0.910717	0.187355	Non-significant	B-FU1	fast-slow
LEP	OID20187	P41159	Cardiometabolic	Timepoint:progression_status	B fast - FU3 fast	1.56534	-0.351068	3.48176	0.195278	Non-significant	B-FU3	fast-fast
RARRES1	OID21177	P49788	Oncology	Timepoint:progression_status	FU1 fast - B slow	0.448578	-0.102837	0.999992	0.196894	Non-significant	FU1-B	fast-slow
AGER	OID20756	Q15109	Inflammation	Timepoint:progression_status	B slow - FU1 slow	-0.311	-0.694651	0.0726509	0.202299	Non-significant	B-FU1	slow-slow
LEP	OID20187	P41159	Cardiometabolic	Timepoint:progression_status	FU1 fast - FU3 slow	-1.19201	-2.66407	0.280051	0.204053	Non-significant	FU1-FU3	fast-slow
LEP	OID20187	P41159	Cardiometabolic	Timepoint:progression_status	FU2 fast - B slow	-1.10833	-2.48053	0.263879	0.204408	Non-significant	FU2-B	fast-slow
IL6	OID21276	P05231	Oncology	Timepoint:progression_status	FU3 fast - FU2 slow	2.23881	-0.526663	5.00429	0.207249	Non-significant	FU3-FU2	fast-slow
FABP9	OID20501	Q0Z7S8	Inflammation	Timepoint:progression_status	FU2 fast - FU1 slow	-0.650622	-1.46925	0.168005	0.216917	Non-significant	FU2-FU1	fast-slow
CHAD	OID30660	O15335	Inflammation_II	Timepoint:progression_status	FU3 fast - B slow	-1.3782	-3.09924	0.342843	0.219175	Non-significant	FU3-B	fast-slow
SPINT3	OID31509	P49223	Oncology_II	Timepoint:progression_status	B fast - FU2 fast	0.725565	-0.186384	1.63751	0.222441	Non-significant	B-FU2	fast-fast
LEP	OID20187	P41159	Cardiometabolic	Timepoint:progression_status	FU1 fast - B slow	-1.03251	-2.33696	0.271946	0.223436	Non-significant	FU1-B	fast-slow
PRND	OID31124	Q9UKY0	Neurology_II	Timepoint:progression_status	B slow - FU1 slow	-0.408907	-0.924097	0.106282	0.224761	Non-significant	B-FU1	slow-slow
DHODH	OID30137	Q02127	Cardiometabolic_II	Timepoint:progression_status	B fast - FU1 fast	0.39612	-0.105951	0.898191	0.230587	Non-significant	B-FU1	fast-fast
RBM17	OID31034	Q96I25	Neurology_II	Timepoint:progression_status	B fast - FU1 fast	0.605587	-0.162952	1.37413	0.232833	Non-significant	B-FU1	fast-fast
PRND	OID31124	Q9UKY0	Neurology_II	Timepoint:progression_status	FU2 fast - FU3 fast	1.24412	-0.336441	2.82467	0.234956	Non-significant	FU2-FU3	fast-fast
GADD45GIP1	OID30237	Q8TAE8	Cardiometabolic_II	Timepoint:progression_status	B fast - B slow	0.403157	-0.111557	0.917871	0.240385	Non-significant	B-B	fast-slow
BGLAP	OID30389	P02818	Cardiometabolic_II	Timepoint:progression_status	FU2 fast - B slow	-1.15032	-2.62292	0.322281	0.243374	Non-significant	FU2-B	fast-slow
IL6	OID21276	P05231	Oncology	Timepoint:progression_status	FU3 fast - B slow	2.1602	-0.602197	4.92259	0.245727	Non-significant	FU3-B	fast-slow
CBX2	OID30177	Q14781	Cardiometabolic_II	Timepoint:progression_status	FU1 slow - FU3 slow	0.405755	-0.114093	0.925603	0.246132	Non-significant	FU1-FU3	slow-slow
IL6	OID20911	P05231	Neurology	Timepoint:progression_status	FU3 fast - FU1 slow	2.16128	-0.603625	4.92618	0.246211	Non-significant	FU3-FU1	fast-slow
INSL3	OID31129	P51460	Neurology_II	Timepoint:progression_status	FU1 fast - FU3 slow	-1.54576	-3.54008	0.448566	0.247799	Non-significant	FU1-FU3	fast-slow
SYAP1	OID30636	Q96A49	Inflammation_II	Timepoint:progression_status	FU2 fast - FU3 slow	0.409754	-0.115551	0.93506	0.248572	Non-significant	FU2-FU3	fast-slow
CPM	OID21054	P14384	Neurology	Timepoint:progression_status	B fast - FU3 fast	0.927379	-0.267201	2.12196	0.251128	Non-significant	B-FU3	fast-fast
IL6	OID21276	P05231	Oncology	Timepoint:progression_status	FU2 slow - FU3 slow	-0.998107	-2.2898	0.293585	0.256051	Non-significant	FU2-FU3	slow-slow
RBM17	OID31034	Q96I25	Neurology_II	Timepoint:progression_status	FU1 fast - B slow	-0.57237	-1.31204	0.1673	0.257498	Non-significant	FU1-B	fast-slow
CPM	OID21054	P14384	Neurology	Timepoint:progression_status	FU1 fast - FU2 slow	-0.541041	-1.24683	0.164747	0.26229	Non-significant	FU1-FU2	fast-slow
CPM	OID21054	P14384	Neurology	Timepoint:progression_status	FU3 fast - FU3 slow	-1.0353	-2.38418	0.313581	0.267563	Non-significant	FU3-FU3	fast-slow
AGR2	OID20896	O95994	Neurology	Timepoint:progression_status	FU2 fast - B slow	1.81171	-0.561716	4.18515	0.271764	Non-significant	FU2-B	fast-slow
IL6	OID20911	P05231	Neurology	Timepoint:progression_status	FU3 fast - FU2 slow	2.10962	-0.658365	4.8776	0.276158	Non-significant	FU3-FU2	fast-slow
BPIFB1	OID20308	Q8TDL5	Cardiometabolic	Timepoint:progression_status	FU1 fast - FU2 slow	-0.841018	-1.95656	0.274521	0.276246	Non-significant	FU1-FU2	fast-slow
CRH	OID21257	P06850	Oncology	Timepoint:progression_status	FU1 slow - FU3 slow	1.07583	-0.349971	2.50164	0.284469	Non-significant	FU1-FU3	slow-slow
UPB1	OID30352	Q9UBR1	Cardiometabolic_II	Timepoint:progression_status	FU3 fast - FU1 slow	-2.25641	-5.23858	0.725766	0.284825	Non-significant	FU3-FU1	fast-slow
CBX2	OID30177	Q14781	Cardiometabolic_II	Timepoint:progression_status	B slow - FU3 slow	0.392555	-0.127293	0.912403	0.285332	Non-significant	B-FU3	slow-slow
KRT19	OID20596	P08727	Inflammation	Timepoint:progression_status	FU3 fast - FU2 slow	2.66852	-0.861511	6.19854	0.286185	Non-significant	FU3-FU2	fast-slow
CRH	OID21257	P06850	Oncology	Timepoint:progression_status	FU2 fast - FU1 slow	-1.28351	-2.98848	0.421447	0.287609	Non-significant	FU2-FU1	fast-slow
SPINT3	OID31509	P49223	Oncology_II	Timepoint:progression_status	FU2 fast - FU1 slow	-1.23604	-2.8911	0.419029	0.288375	Non-significant	FU2-FU1	fast-slow
BGLAP	OID30389	P02818	Cardiometabolic_II	Timepoint:progression_status	FU3 fast - FU1 slow	-1.8997	-4.41748	0.61808	0.288437	Non-significant	FU3-FU1	fast-slow
RARRES1	OID21177	P49788	Oncology	Timepoint:progression_status	B slow - FU3 slow	-0.341664	-0.79603	0.112703	0.288573	Non-significant	B-FU3	slow-slow
RAB33A	OID30122	Q14088	Cardiometabolic_II	Timepoint:progression_status	FU2 fast - FU3 slow	-0.339281	-0.789099	0.110537	0.289066	Non-significant	FU2-FU3	fast-slow
LEO1	OID30991	Q8WVC0	Neurology_II	Timepoint:progression_status	B fast - FU1 slow	0.93415	-0.315217	2.18352	0.291042	Non-significant	B-FU1	fast-slow
RARRES1	OID21177	P49788	Oncology	Timepoint:progression_status	B fast - B slow	0.411451	-0.139963	0.962865	0.293932	Non-significant	B-B	fast-slow
LEO1	OID30991	Q8WVC0	Neurology_II	Timepoint:progression_status	FU2 fast - B slow	0.99563	-0.336664	2.32792	0.294798	Non-significant	FU2-B	fast-slow
SYAP1	OID30636	Q96A49	Inflammation_II	Timepoint:progression_status	B fast - FU1 slow	0.301171	-0.101259	0.703601	0.294846	Non-significant	B-FU1	fast-slow
PGF	OID20673	P49763	Inflammation	Timepoint:progression_status	FU2 fast - FU1 slow	0.508337	-0.173645	1.19032	0.295443	Non-significant	FU2-FU1	fast-slow
AGR2	OID20896	O95994	Neurology	Timepoint:progression_status	FU1 slow - FU2 slow	1.04189	-0.362052	2.44582	0.303588	Non-significant	FU1-FU2	slow-slow
PRND	OID31124	Q9UKY0	Neurology_II	Timepoint:progression_status	FU2 fast - FU2 slow	-0.780069	-1.83527	0.275135	0.307083	Non-significant	FU2-FU2	fast-slow
IL17D	OID20481	Q8TAD2	Inflammation	Timepoint:progression_status	B fast - FU2 fast	-0.444034	-1.04468	0.156615	0.309144	Non-significant	B-FU2	fast-fast
CBX2	OID30177	Q14781	Cardiometabolic_II	Timepoint:progression_status	FU2 slow - FU3 slow	0.385251	-0.136675	0.907178	0.313485	Non-significant	FU2-FU3	slow-slow
KLK4	OID21391	Q9Y5K2	Oncology	Timepoint:progression_status	B fast - FU3 slow	1.04956	-0.378922	2.47804	0.315376	Non-significant	B-FU3	fast-slow
MME	OID21307	P08473	Oncology	Timepoint:progression_status	FU1 slow - FU2 slow	-0.501009	-1.18275	0.180736	0.315433	Non-significant	FU1-FU2	slow-slow
AGER	OID20756	Q15109	Inflammation	Timepoint:progression_status	FU3 fast - FU2 slow	-0.922307	-2.17298	0.328368	0.31711	Non-significant	FU3-FU2	fast-slow
FABP9	OID20501	Q0Z7S8	Inflammation	Timepoint:progression_status	B fast - FU2 slow	-0.575932	-1.37408	0.222212	0.3256	Non-significant	B-FU2	fast-slow
SPINT3	OID31509	P49223	Oncology_II	Timepoint:progression_status	FU2 fast - B slow	-1.1989	-2.85396	0.45617	0.325619	Non-significant	FU2-B	fast-slow
SPTBN2	OID30876	O15020	Neurology_II	Timepoint:progression_status	B fast - FU2 fast	0.500598	-0.186665	1.18786	0.328956	Non-significant	B-FU2	fast-fast
IL6	OID20911	P05231	Neurology	Timepoint:progression_status	FU3 fast - B slow	2.01562	-0.749285	4.78053	0.33177	Non-significant	FU3-B	fast-slow
BPIFB1	OID20308	Q8TDL5	Cardiometabolic	Timepoint:progression_status	FU3 fast - FU3 slow	-1.28539	-3.05166	0.480886	0.334217	Non-significant	FU3-FU3	fast-slow
FABP9	OID20501	Q0Z7S8	Inflammation	Timepoint:progression_status	FU1 fast - FU3 slow	-0.611947	-1.46233	0.238432	0.336095	Non-significant	FU1-FU3	fast-slow
CRH	OID21257	P06850	Oncology	Timepoint:progression_status	B fast - FU1 slow	-1.14202	-2.72371	0.439677	0.336981	Non-significant	B-FU1	fast-slow
CHAD	OID30660	O15335	Inflammation_II	Timepoint:progression_status	FU2 fast - FU3 slow	-0.898697	-2.14925	0.351858	0.345647	Non-significant	FU2-FU3	fast-slow
CHAD	OID30660	O15335	Inflammation_II	Timepoint:progression_status	FU1 fast - FU2 fast	0.531956	-0.212559	1.27647	0.351861	Non-significant	FU1-FU2	fast-fast
PDIA3	OID30573	P30101	Inflammation_II	Timepoint:progression_status	B fast - FU2 slow	0.455918	-0.18164	1.09348	0.352378	Non-significant	B-FU2	fast-slow
IL6	OID21276	P05231	Oncology	Timepoint:progression_status	B slow - FU3 slow	-0.919489	-2.20742	0.368443	0.353954	Non-significant	B-FU3	slow-slow
MME	OID21307	P08473	Oncology	Timepoint:progression_status	B fast - FU3 fast	1.45878	-0.584999	3.50256	0.354168	Non-significant	B-FU3	fast-fast
IL6	OID20911	P05231	Neurology	Timepoint:progression_status	FU1 slow - FU3 slow	-0.910637	-2.19598	0.374711	0.363849	Non-significant	FU1-FU3	slow-slow
SPTBN2	OID30876	O15020	Neurology_II	Timepoint:progression_status	B fast - FU3 slow	0.526088	-0.21359	1.26577	0.364079	Non-significant	B-FU3	fast-slow
PRND	OID31124	Q9UKY0	Neurology_II	Timepoint:progression_status	FU1 fast - FU3 slow	-0.802768	-1.94217	0.336638	0.37218	Non-significant	FU1-FU3	fast-slow
SPTBN2	OID30876	O15020	Neurology_II	Timepoint:progression_status	B slow - FU1 slow	-0.331659	-0.803133	0.139815	0.372285	Non-significant	B-FU1	slow-slow
KLK4	OID21391	Q9Y5K2	Oncology	Timepoint:progression_status	FU2 fast - FU3 fast	-1.23478	-2.99891	0.529358	0.379463	Non-significant	FU2-FU3	fast-fast
SPINT3	OID31509	P49223	Oncology_II	Timepoint:progression_status	FU3 fast - FU1 slow	-1.61035	-3.9034	0.682705	0.380197	Non-significant	FU3-FU1	fast-slow
AGR2	OID20896	O95994	Neurology	Timepoint:progression_status	FU3 fast - FU1 slow	3.0055	-1.28126	7.29226	0.38257	Non-significant	FU3-FU1	fast-slow
FABP9	OID20501	Q0Z7S8	Inflammation	Timepoint:progression_status	FU2 fast - B slow	-0.564636	-1.38326	0.25399	0.386013	Non-significant	FU2-B	fast-slow
KLK4	OID21391	Q9Y5K2	Oncology	Timepoint:progression_status	FU2 slow - FU3 slow	-0.600178	-1.46574	0.265386	0.391534	Non-significant	FU2-FU3	slow-slow
BGLAP	OID30389	P02818	Cardiometabolic_II	Timepoint:progression_status	FU3 fast - B slow	-1.74623	-4.26401	0.771546	0.397195	Non-significant	FU3-B	fast-slow
PRND	OID31124	Q9UKY0	Neurology_II	Timepoint:progression_status	FU1 fast - FU2 fast	-0.530878	-1.30245	0.240691	0.401448	Non-significant	FU1-FU2	fast-fast
BGLAP	OID30389	P02818	Cardiometabolic_II	Timepoint:progression_status	FU1 fast - FU2 fast	0.806427	-0.365838	1.97869	0.40225	Non-significant	FU1-FU2	fast-fast
RBM17	OID31034	Q96I25	Neurology_II	Timepoint:progression_status	FU2 fast - FU2 slow	0.568512	-0.256113	1.39314	0.404957	Non-significant	FU2-FU2	fast-slow
BPIFB1	OID20308	Q8TDL5	Cardiometabolic	Timepoint:progression_status	FU2 fast - FU1 slow	0.788634	-0.36905	1.94632	0.407008	Non-significant	FU2-FU1	fast-slow
SPINT3	OID31509	P49223	Oncology_II	Timepoint:progression_status	FU2 fast - FU2 slow	-1.12382	-2.78143	0.533784	0.410561	Non-significant	FU2-FU2	fast-slow
SPINT3	OID31509	P49223	Oncology_II	Timepoint:progression_status	FU3 fast - B slow	-1.57321	-3.86626	0.719846	0.411272	Non-significant	FU3-B	fast-slow
INSL3	OID31129	P51460	Neurology_II	Timepoint:progression_status	FU3 fast - FU1 slow	-1.76702	-4.3806	0.846574	0.430681	Non-significant	FU3-FU1	fast-slow
SYAP1	OID30636	Q96A49	Inflammation_II	Timepoint:progression_status	B fast - B slow	0.270875	-0.131555	0.673304	0.432246	Non-significant	B-B	fast-slow
UPB1	OID30352	Q9UBR1	Cardiometabolic_II	Timepoint:progression_status	B fast - FU2 slow	-0.962202	-2.39381	0.469411	0.436132	Non-significant	B-FU2	fast-slow
BGLAP	OID30389	P02818	Cardiometabolic_II	Timepoint:progression_status	B fast - FU2 fast	0.785787	-0.386478	1.95805	0.4367	Non-significant	B-FU2	fast-fast
AGR2	OID20896	O95994	Neurology	Timepoint:progression_status	B fast - B slow	1.46571	-0.723071	3.6545	0.437408	Non-significant	B-B	fast-slow
IL6	OID20911	P05231	Neurology	Timepoint:progression_status	FU2 slow - FU3 slow	-0.858972	-2.14804	0.4301	0.444875	Non-significant	FU2-FU3	slow-slow
RBM17	OID31034	Q96I25	Neurology_II	Timepoint:progression_status	FU2 fast - FU1 slow	0.547688	-0.273167	1.36854	0.448829	Non-significant	FU2-FU1	fast-slow
PDIA3	OID30573	P30101	Inflammation_II	Timepoint:progression_status	B fast - FU2 fast	-0.413421	-1.04106	0.214214	0.459863	Non-significant	B-FU2	fast-fast
M6PR	OID30208	P20645	Cardiometabolic_II	Timepoint:progression_status	FU2 fast - FU3 fast	0.286892	-0.149268	0.723051	0.462567	Non-significant	FU2-FU3	fast-fast
CHAD	OID30660	O15335	Inflammation_II	Timepoint:progression_status	B fast - FU3 fast	0.993427	-0.520151	2.507	0.464794	Non-significant	B-FU3	fast-fast
PRND	OID31124	Q9UKY0	Neurology_II	Timepoint:progression_status	FU2 slow - FU3 slow	0.508179	-0.268729	1.28509	0.469205	Non-significant	FU2-FU3	slow-slow
SLC9A3R1	OID30630	O14745	Inflammation_II	Timepoint:progression_status	B fast - FU2 slow	0.513261	-0.271384	1.29791	0.47282	Non-significant	B-FU2	fast-slow
MME	OID21307	P08473	Oncology	Timepoint:progression_status	FU2 fast - FU2 slow	-0.909337	-2.31064	0.491962	0.47595	Non-significant	FU2-FU2	fast-slow
IL17D	OID20481	Q8TAD2	Inflammation	Timepoint:progression_status	FU1 fast - FU2 fast	-0.390801	-0.99145	0.209849	0.476221	Non-significant	FU1-FU2	fast-fast
PDIA3	OID30573	P30101	Inflammation_II	Timepoint:progression_status	B slow - FU3 slow	0.406915	-0.218145	1.03197	0.47694	Non-significant	B-FU3	slow-slow
INSL3	OID31129	P51460	Neurology_II	Timepoint:progression_status	FU2 fast - FU1 slow	-1.23028	-3.14124	0.68069	0.477011	Non-significant	FU2-FU1	fast-slow
SPINT3	OID31509	P49223	Oncology_II	Timepoint:progression_status	FU3 fast - FU2 slow	-1.49813	-3.79316	0.796887	0.477986	Non-significant	FU3-FU2	fast-slow
SPTBN2	OID30876	O15020	Neurology_II	Timepoint:progression_status	B fast - FU2 slow	0.376584	-0.200987	0.954156	0.480162	Non-significant	B-FU2	fast-slow
FABP9	OID20501	Q0Z7S8	Inflammation	Timepoint:progression_status	B fast - FU1 slow	-0.507981	-1.30505	0.289088	0.484694	Non-significant	B-FU1	fast-slow
IL6	OID21276	P05231	Oncology	Timepoint:progression_status	FU1 fast - FU1 slow	0.97318	-0.539817	2.48618	0.486859	Non-significant	FU1-FU1	fast-slow
CHAD	OID30660	O15335	Inflammation_II	Timepoint:progression_status	FU1 fast - FU2 slow	-0.690416	-1.76985	0.389017	0.487085	Non-significant	FU1-FU2	fast-slow
AGER	OID20756	Q15109	Inflammation	Timepoint:progression_status	B slow - FU3 slow	-0.370696	-0.946273	0.204881	0.490119	Non-significant	B-FU3	slow-slow
MME	OID21307	P08473	Oncology	Timepoint:progression_status	B slow - FU2 slow	-0.437809	-1.11955	0.243936	0.491973	Non-significant	B-FU2	slow-slow
FABP9	OID20501	Q0Z7S8	Inflammation	Timepoint:progression_status	B fast - FU1 fast	0.2365	-0.13276	0.60576	0.495827	Non-significant	B-FU1	fast-fast
LEO1	OID30991	Q8WVC0	Neurology_II	Timepoint:progression_status	FU2 fast - FU3 slow	0.980869	-0.547429	2.50917	0.498777	Non-significant	FU2-FU3	fast-slow
UPB1	OID30352	Q9UBR1	Cardiometabolic_II	Timepoint:progression_status	FU2 slow - FU3 slow	0.946991	-0.535063	2.42904	0.502256	Non-significant	FU2-FU3	slow-slow
CRH	OID21257	P06850	Oncology	Timepoint:progression_status	FU3 fast - FU2 slow	-1.92104	-4.92892	1.08684	0.507359	Non-significant	FU3-FU2	fast-slow
CPM	OID21054	P14384	Neurology	Timepoint:progression_status	FU2 fast - FU2 slow	-0.478671	-1.23287	0.275527	0.508637	Non-significant	FU2-FU2	fast-slow
RARRES1	OID21177	P49788	Oncology	Timepoint:progression_status	B slow - FU1 slow	0.192111	-0.110813	0.495036	0.508977	Non-significant	B-FU1	slow-slow
PRND	OID31124	Q9UKY0	Neurology_II	Timepoint:progression_status	B fast - FU3 slow	-0.722602	-1.86201	0.416804	0.511849	Non-significant	B-FU3	fast-slow
PGF	OID20673	P49763	Inflammation	Timepoint:progression_status	FU1 fast - FU2 fast	-0.298124	-0.769529	0.17328	0.513148	Non-significant	FU1-FU2	fast-fast
BPIFB1	OID20308	Q8TDL5	Cardiometabolic	Timepoint:progression_status	B fast - FU2 fast	-0.443932	-1.14709	0.259223	0.515386	Non-significant	B-FU2	fast-fast
INSL3	OID31129	P51460	Neurology_II	Timepoint:progression_status	FU3 fast - B slow	-1.65736	-4.27095	0.956233	0.516232	Non-significant	FU3-B	fast-slow
CHAD	OID30660	O15335	Inflammation_II	Timepoint:progression_status	B fast - FU3 slow	-0.755481	-1.95873	0.447763	0.521785	Non-significant	B-FU3	fast-slow
SLC9A3R1	OID30630	O14745	Inflammation_II	Timepoint:progression_status	FU1 fast - FU1 slow	-0.489644	-1.27019	0.290906	0.52812	Non-significant	FU1-FU1	fast-slow
BPIFB1	OID20308	Q8TDL5	Cardiometabolic	Timepoint:progression_status	FU3 fast - FU1 slow	-1.05581	-2.74284	0.631227	0.53442	Non-significant	FU3-FU1	fast-slow
IL17D	OID20481	Q8TAD2	Inflammation	Timepoint:progression_status	FU2 fast - B slow	0.508924	-0.316216	1.33406	0.543517	Non-significant	FU2-B	fast-slow
GADD45GIP1	OID30237	Q8TAE8	Cardiometabolic_II	Timepoint:progression_status	B fast - FU3 slow	0.389659	-0.239055	1.01837	0.546121	Non-significant	B-FU3	fast-slow
SLC9A3R1	OID30630	O14745	Inflammation_II	Timepoint:progression_status	FU1 fast - FU3 slow	-0.60706	-1.58609	0.371966	0.546307	Non-significant	FU1-FU3	fast-slow
IL6	OID20911	P05231	Neurology	Timepoint:progression_status	B fast - FU1 fast	0.70456	-0.446738	1.85586	0.554909	Non-significant	B-FU1	fast-fast
CPM	OID21054	P14384	Neurology	Timepoint:progression_status	B slow - FU1 slow	-0.242159	-0.6383	0.153982	0.55636	Non-significant	B-FU1	slow-slow
RBM17	OID31034	Q96I25	Neurology_II	Timepoint:progression_status	FU2 fast - FU3 slow	0.616789	-0.392313	1.62589	0.565149	Non-significant	FU2-FU3	fast-slow
PDIA3	OID30573	P30101	Inflammation_II	Timepoint:progression_status	FU2 fast - B slow	0.422015	-0.270401	1.11443	0.565428	Non-significant	FU2-B	fast-slow
PGF	OID20673	P49763	Inflammation	Timepoint:progression_status	FU2 fast - FU2 slow	0.410757	-0.272873	1.09439	0.57446	Non-significant	FU2-FU2	fast-slow
CHAD	OID30660	O15335	Inflammation_II	Timepoint:progression_status	FU2 fast - FU1 slow	-0.674222	-1.80216	0.45372	0.578875	Non-significant	FU2-FU1	fast-slow
SPTBN2	OID30876	O15020	Neurology_II	Timepoint:progression_status	FU1 fast - FU1 slow	-0.346618	-0.920777	0.227541	0.580783	Non-significant	FU1-FU1	fast-slow
UPB1	OID30352	Q9UBR1	Cardiometabolic_II	Timepoint:progression_status	B fast - FU2 fast	0.892293	-0.596653	2.38124	0.583196	Non-significant	B-FU2	fast-fast
SLC9A3R1	OID30630	O14745	Inflammation_II	Timepoint:progression_status	B fast - FU1 slow	0.468336	-0.312214	1.24889	0.585196	Non-significant	B-FU1	fast-slow
FABP9	OID20501	Q0Z7S8	Inflammation	Timepoint:progression_status	FU2 fast - FU3 slow	-0.518088	-1.38932	0.353147	0.585548	Non-significant	FU2-FU3	fast-slow
AKR7L	OID30488	Q8NHP1	Inflammation_II	Timepoint:progression_status	FU1 fast - FU1 slow	-0.502746	-1.34079	0.335303	0.585968	Non-significant	FU1-FU1	fast-slow
CPM	OID21054	P14384	Neurology	Timepoint:progression_status	FU3 fast - FU1 slow	-0.765763	-2.04197	0.510445	0.588309	Non-significant	FU3-FU1	fast-slow
SYAP1	OID30636	Q96A49	Inflammation_II	Timepoint:progression_status	B fast - FU3 slow	0.296257	-0.198271	0.790786	0.589706	Non-significant	B-FU3	fast-slow
PDIA3	OID30573	P30101	Inflammation_II	Timepoint:progression_status	B fast - FU1 slow	0.378175	-0.256412	1.01276	0.590965	Non-significant	B-FU1	fast-slow
IL6	OID20911	P05231	Neurology	Timepoint:progression_status	B slow - FU3 slow	-0.764977	-2.05032	0.52037	0.591986	Non-significant	B-FU3	slow-slow
INSL3	OID31129	P51460	Neurology_II	Timepoint:progression_status	FU2 fast - B slow	-1.12062	-3.03159	0.790349	0.595717	Non-significant	FU2-B	fast-slow
LEO1	OID30991	Q8WVC0	Neurology_II	Timepoint:progression_status	FU2 slow - FU3 slow	-0.614244	-1.65046	0.421969	0.596604	Non-significant	FU2-FU3	slow-slow
BGLAP	OID30389	P02818	Cardiometabolic_II	Timepoint:progression_status	FU1 fast - FU3 fast	1.40234	-0.962052	3.76673	0.597509	Non-significant	FU1-FU3	fast-fast
SPINT3	OID31509	P49223	Oncology_II	Timepoint:progression_status	B fast - FU3 fast	1.09987	-0.761123	2.96087	0.599874	Non-significant	B-FU3	fast-fast
CPM	OID21054	P14384	Neurology	Timepoint:progression_status	FU2 fast - FU3 fast	0.712956	-0.495974	1.92188	0.603854	Non-significant	FU2-FU3	fast-fast
GNE	OID21231	Q9Y223	Oncology	Timepoint:progression_status	B fast - FU3 fast	0.873018	-0.601584	2.34762	0.604266	Non-significant	B-FU3	fast-fast
KRT19	OID20596	P08727	Inflammation	Timepoint:progression_status	FU3 fast - FU1 slow	2.07626	-1.44992	5.60243	0.61181	Non-significant	FU3-FU1	fast-slow
CHAD	OID30660	O15335	Inflammation_II	Timepoint:progression_status	B fast - FU1 fast	-0.38874	-1.05401	0.276533	0.612456	Non-significant	B-FU1	fast-fast
PRND	OID31124	Q9UKY0	Neurology_II	Timepoint:progression_status	B fast - FU2 fast	-0.450711	-1.22228	0.320857	0.613856	Non-significant	B-FU2	fast-fast
BGLAP	OID30389	P02818	Cardiometabolic_II	Timepoint:progression_status	B fast - FU3 fast	1.3817	-0.982692	3.74609	0.615663	Non-significant	B-FU3	fast-fast
PNMA2	OID30842	Q9UL42	Neurology_II	Timepoint:progression_status	B fast - FU2 fast	-0.319932	-0.867248	0.227384	0.62088	Non-significant	B-FU2	fast-fast
BPIFB1	OID20308	Q8TDL5	Cardiometabolic	Timepoint:progression_status	B slow - FU3 slow	-0.411088	-1.119	0.296825	0.621253	Non-significant	B-FU3	slow-slow
CPM	OID21054	P14384	Neurology	Timepoint:progression_status	B fast - B slow	0.403776	-0.299548	1.1071	0.630015	Non-significant	B-B	fast-slow
RAB33A	OID30122	Q14088	Cardiometabolic_II	Timepoint:progression_status	FU2 fast - FU2 slow	-0.211567	-0.576838	0.153703	0.631921	Non-significant	FU2-FU2	fast-slow
GNE	OID21231	Q9Y223	Oncology	Timepoint:progression_status	B slow - FU2 slow	-0.307063	-0.843152	0.229025	0.635157	Non-significant	B-FU2	slow-slow
SPINT3	OID31509	P49223	Oncology_II	Timepoint:progression_status	FU1 slow - FU3 slow	0.526185	-0.392615	1.44499	0.637479	Non-significant	FU1-FU3	slow-slow
METAP1D	OID20519	Q6UB28	Inflammation	Timepoint:progression_status	B fast - FU3 slow	1.14122	-0.841539	3.12397	0.638399	Non-significant	B-FU3	fast-slow
KRT19	OID20596	P08727	Inflammation	Timepoint:progression_status	FU2 fast - B slow	1.20977	-0.915712	3.33526	0.643175	Non-significant	FU2-B	fast-slow
PGF	OID20673	P49763	Inflammation	Timepoint:progression_status	B fast - B slow	0.36558	-0.282437	1.0136	0.644988	Non-significant	B-B	fast-slow
PDIA3	OID30573	P30101	Inflammation_II	Timepoint:progression_status	B fast - FU1 fast	0.322387	-0.245165	0.889938	0.645949	Non-significant	B-FU1	fast-fast
UPB1	OID30352	Q9UBR1	Cardiometabolic_II	Timepoint:progression_status	B fast - FU3 fast	1.67833	-1.26473	4.62139	0.646737	Non-significant	B-FU3	fast-fast
GNE	OID21231	Q9Y223	Oncology	Timepoint:progression_status	FU1 fast - B slow	0.37363	-0.280068	1.02733	0.647187	Non-significant	FU1-B	fast-slow
BPIFB1	OID20308	Q8TDL5	Cardiometabolic	Timepoint:progression_status	B fast - FU2 slow	-0.624204	-1.73974	0.491335	0.650782	Non-significant	B-FU2	fast-slow
SLC9A3R1	OID30630	O14745	Inflammation_II	Timepoint:progression_status	FU2 fast - B slow	0.489153	-0.370579	1.34889	0.651139	Non-significant	FU2-B	fast-slow
SLC9A3R1	OID30630	O14745	Inflammation_II	Timepoint:progression_status	FU1 fast - FU2 slow	-0.444719	-1.22936	0.339926	0.654062	Non-significant	FU1-FU2	fast-slow
IL6	OID21276	P05231	Oncology	Timepoint:progression_status	FU1 fast - FU2 slow	0.85355	-0.664843	2.37194	0.655142	Non-significant	FU1-FU2	fast-slow
AKR7L	OID30488	Q8NHP1	Inflammation_II	Timepoint:progression_status	FU1 fast - FU3 slow	-0.596135	-1.64835	0.456075	0.657518	Non-significant	FU1-FU3	fast-slow
METAP1D	OID20519	Q6UB28	Inflammation	Timepoint:progression_status	FU2 fast - FU3 slow	1.18904	-0.916282	3.29436	0.660912	Non-significant	FU2-FU3	fast-slow
RAB33A	OID30122	Q14088	Cardiometabolic_II	Timepoint:progression_status	B fast - FU3 slow	-0.236027	-0.656608	0.184555	0.668696	Non-significant	B-FU3	fast-slow
CHAD	OID30660	O15335	Inflammation_II	Timepoint:progression_status	FU2 fast - FU3 fast	0.850211	-0.679446	2.37987	0.67235	Non-significant	FU2-FU3	fast-fast
INSL3	OID31129	P51460	Neurology_II	Timepoint:progression_status	FU1 slow - FU3 slow	0.57318	-0.460589	1.60695	0.674339	Non-significant	FU1-FU3	slow-slow
AKR7L	OID30488	Q8NHP1	Inflammation_II	Timepoint:progression_status	B slow - FU1 slow	-0.334644	-0.939468	0.270179	0.676839	Non-significant	B-FU1	slow-slow
FABP9	OID20501	Q0Z7S8	Inflammation	Timepoint:progression_status	B slow - FU2 slow	-0.153936	-0.43295	0.125077	0.679365	Non-significant	B-FU2	slow-slow
CBX2	OID30177	Q14781	Cardiometabolic_II	Timepoint:progression_status	FU2 fast - FU3 slow	0.358651	-0.286921	1.00422	0.679941	Non-significant	FU2-FU3	fast-slow
PRND	OID31124	Q9UKY0	Neurology_II	Timepoint:progression_status	FU2 fast - FU1 slow	0.579171	-0.473184	1.63153	0.680137	Non-significant	FU2-FU1	fast-slow
MME	OID21307	P08473	Oncology	Timepoint:progression_status	FU3 fast - FU2 slow	-1.248	-3.49773	1.00173	0.681576	Non-significant	FU3-FU2	fast-slow
PRND	OID31124	Q9UKY0	Neurology_II	Timepoint:progression_status	B fast - B slow	0.537368	-0.455986	1.53072	0.693874	Non-significant	B-B	fast-slow
IL6	OID20911	P05231	Neurology	Timepoint:progression_status	FU1 fast - FU1 slow	0.825394	-0.698906	2.3497	0.695831	Non-significant	FU1-FU1	fast-slow
CPM	OID21054	P14384	Neurology	Timepoint:progression_status	FU1 fast - FU3 fast	0.650586	-0.543994	1.84517	0.696	Non-significant	FU1-FU3	fast-fast
INSL3	OID31129	P51460	Neurology_II	Timepoint:progression_status	B fast - FU1 slow	-0.991339	-2.84575	0.863068	0.69641	Non-significant	B-FU1	fast-slow
MME	OID21307	P08473	Oncology	Timepoint:progression_status	B fast - FU1 slow	0.71179	-0.610162	2.03374	0.697708	Non-significant	B-FU1	fast-slow
KRT19	OID20596	P08727	Inflammation	Timepoint:progression_status	FU1 slow - FU2 slow	0.59226	-0.499832	1.68435	0.697838	Non-significant	FU1-FU2	slow-slow
GNE	OID21231	Q9Y223	Oncology	Timepoint:progression_status	FU1 fast - FU3 slow	0.459216	-0.381867	1.3003	0.69892	Non-significant	FU1-FU3	fast-slow
IL6	OID21276	P05231	Oncology	Timepoint:progression_status	B fast - FU1 fast	0.62378	-0.530487	1.77805	0.701608	Non-significant	B-FU1	fast-fast
PGF	OID20673	P49763	Inflammation	Timepoint:progression_status	B slow - FU2 slow	-0.17202	-0.49042	0.146379	0.701975	Non-significant	B-FU2	slow-slow
PGF	OID20673	P49763	Inflammation	Timepoint:progression_status	FU2 fast - FU3 slow	0.412966	-0.350181	1.17611	0.703568	Non-significant	FU2-FU3	fast-slow
KRT19	OID20596	P08727	Inflammation	Timepoint:progression_status	B fast - B slow	1.07058	-0.927329	3.06848	0.705175	Non-significant	B-B	fast-slow
FABP9	OID20501	Q0Z7S8	Inflammation	Timepoint:progression_status	B fast - B slow	-0.421996	-1.21906	0.375074	0.705674	Non-significant	B-B	fast-slow
IL17D	OID20481	Q8TAD2	Inflammation	Timepoint:progression_status	FU2 slow - FU3 slow	0.326037	-0.278868	0.930942	0.706179	Non-significant	FU2-FU3	slow-slow
MME	OID21307	P08473	Oncology	Timepoint:progression_status	FU2 fast - FU3 slow	-0.849741	-2.42765	0.728172	0.709508	Non-significant	FU2-FU3	fast-slow
KLK4	OID21391	Q9Y5K2	Oncology	Timepoint:progression_status	FU1 slow - FU2 slow	0.308911	-0.269757	0.88758	0.714723	Non-significant	FU1-FU2	slow-slow
IL6	OID21276	P05231	Oncology	Timepoint:progression_status	FU1 fast - FU3 fast	-1.38526	-3.97756	1.20704	0.716024	Non-significant	FU1-FU3	fast-fast
INSL3	OID31129	P51460	Neurology_II	Timepoint:progression_status	FU1 slow - FU2 slow	0.367525	-0.322898	1.05795	0.71731	Non-significant	FU1-FU2	slow-slow
SPINT3	OID31509	P49223	Oncology_II	Timepoint:progression_status	B slow - FU3 slow	0.489044	-0.429756	1.40784	0.718205	Non-significant	B-FU3	slow-slow
INSL3	OID31129	P51460	Neurology_II	Timepoint:progression_status	FU3 fast - FU2 slow	-1.39949	-4.01527	1.21629	0.71925	Non-significant	FU3-FU2	fast-slow
UPB1	OID30352	Q9UBR1	Cardiometabolic_II	Timepoint:progression_status	FU3 fast - FU3 slow	-1.69354	-4.86154	1.47447	0.720403	Non-significant	FU3-FU3	fast-slow
PDIA3	OID30573	P30101	Inflammation_II	Timepoint:progression_status	B fast - FU3 slow	0.415508	-0.363224	1.19424	0.722128	Non-significant	B-FU3	fast-slow
MME	OID21307	P08473	Oncology	Timepoint:progression_status	FU1 fast - FU2 slow	-0.691126	-2.0169	0.634644	0.731117	Non-significant	FU1-FU2	fast-slow
LEO1	OID30991	Q8WVC0	Neurology_II	Timepoint:progression_status	FU1 fast - B slow	-0.64907	-1.89844	0.600297	0.737137	Non-significant	FU1-B	fast-slow
AKR7L	OID30488	Q8NHP1	Inflammation_II	Timepoint:progression_status	B fast - FU2 slow	0.441662	-0.400808	1.28413	0.738084	Non-significant	B-FU2	fast-slow
CPM	OID21054	P14384	Neurology	Timepoint:progression_status	B fast - FU1 fast	0.276793	-0.254685	0.808272	0.739208	Non-significant	B-FU1	fast-fast
KRT19	OID20596	P08727	Inflammation	Timepoint:progression_status	FU1 fast - FU3 fast	-1.70083	-4.96314	1.56149	0.740305	Non-significant	FU1-FU3	fast-fast
RARRES1	OID21177	P49788	Oncology	Timepoint:progression_status	FU3 fast - FU3 slow	0.544184	-0.495992	1.58436	0.74224	Non-significant	FU3-FU3	fast-slow
PNMA2	OID30842	Q9UL42	Neurology_II	Timepoint:progression_status	B fast - B slow	-0.238947	-0.695983	0.218089	0.743311	Non-significant	B-B	fast-slow
GNE	OID21231	Q9Y223	Oncology	Timepoint:progression_status	FU2 slow - FU3 slow	0.392648	-0.363019	1.14832	0.746289	Non-significant	FU2-FU3	slow-slow
RARRES1	OID21177	P49788	Oncology	Timepoint:progression_status	B fast - FU3 fast	-0.474397	-1.38977	0.440977	0.746462	Non-significant	B-FU3	fast-fast
CRH	OID21257	P06850	Oncology	Timepoint:progression_status	B slow - FU1 slow	-0.494111	-1.45047	0.462244	0.746671	Non-significant	B-FU1	slow-slow
CBX2	OID30177	Q14781	Cardiometabolic_II	Timepoint:progression_status	B fast - FU3 slow	0.314914	-0.289826	0.919654	0.747012	Non-significant	B-FU3	fast-slow
AGR2	OID20896	O95994	Neurology	Timepoint:progression_status	FU1 fast - FU3 fast	-2.13618	-6.26804	1.99569	0.749697	Non-significant	FU1-FU3	fast-fast
IL6	OID20911	P05231	Neurology	Timepoint:progression_status	FU1 fast - FU3 fast	-1.33589	-3.92368	1.2519	0.750155	Non-significant	FU1-FU3	fast-fast
BPIFB1	OID20308	Q8TDL5	Cardiometabolic	Timepoint:progression_status	FU3 fast - B slow	-0.8743	-2.56134	0.812735	0.751575	Non-significant	FU3-B	fast-slow
IL6	OID21276	P05231	Oncology	Timepoint:progression_status	FU1 fast - B slow	0.774932	-0.738066	2.28793	0.752133	Non-significant	FU1-B	fast-slow
DHODH	OID30137	Q02127	Cardiometabolic_II	Timepoint:progression_status	B slow - FU1 slow	-0.189911	-0.564133	0.18431	0.762259	Non-significant	B-FU1	slow-slow
UPB1	OID30352	Q9UBR1	Cardiometabolic_II	Timepoint:progression_status	B fast - FU1 fast	0.686333	-0.664886	2.03755	0.762733	Non-significant	B-FU1	fast-fast
IL6	OID20911	P05231	Neurology	Timepoint:progression_status	FU1 fast - FU2 slow	0.77373	-0.755906	2.30337	0.763561	Non-significant	FU1-FU2	fast-slow
AKR7L	OID30488	Q8NHP1	Inflammation_II	Timepoint:progression_status	FU1 fast - FU2 slow	-0.429385	-1.27185	0.413085	0.764821	Non-significant	FU1-FU2	fast-slow
PRND	OID31124	Q9UKY0	Neurology_II	Timepoint:progression_status	B fast - FU3 fast	0.793404	-0.769427	2.35623	0.765225	Non-significant	B-FU3	fast-fast
SPTBN2	OID30876	O15020	Neurology_II	Timepoint:progression_status	B fast - FU3 fast	0.663398	-0.638132	1.96493	0.766734	Non-significant	B-FU3	fast-fast
KRT19	OID20596	P08727	Inflammation	Timepoint:progression_status	FU1 fast - FU3 slow	-1.17238	-3.48625	1.14148	0.768684	Non-significant	FU1-FU3	fast-slow
RBM17	OID31034	Q96I25	Neurology_II	Timepoint:progression_status	FU1 fast - FU1 slow	-0.375478	-1.11515	0.364192	0.769853	Non-significant	FU1-FU1	fast-slow
IL17D	OID20481	Q8TAD2	Inflammation	Timepoint:progression_status	FU1 slow - FU2 slow	-0.204501	-0.610646	0.201643	0.771279	Non-significant	FU1-FU2	slow-slow
LEO1	OID30991	Q8WVC0	Neurology_II	Timepoint:progression_status	B fast - B slow	0.62445	-0.624917	1.87382	0.773122	Non-significant	B-B	fast-slow
CHAD	OID30660	O15335	Inflammation_II	Timepoint:progression_status	B fast - FU1 slow	-0.531006	-1.60787	0.545862	0.77962	Non-significant	B-FU1	fast-slow
MME	OID21307	P08473	Oncology	Timepoint:progression_status	FU3 fast - FU3 slow	-1.1884	-3.55678	1.17998	0.780969	Non-significant	FU3-FU3	fast-slow
MME	OID21307	P08473	Oncology	Timepoint:progression_status	B fast - B slow	0.64859	-0.673362	1.97054	0.786464	Non-significant	B-B	fast-slow
CHAD	OID30660	O15335	Inflammation_II	Timepoint:progression_status	B slow - FU3 slow	-0.370712	-1.11958	0.37816	0.786489	Non-significant	B-FU3	slow-slow
CRH	OID21257	P06850	Oncology	Timepoint:progression_status	FU1 fast - FU2 fast	0.705086	-0.720264	2.13044	0.78713	Non-significant	FU1-FU2	fast-fast
PDIA3	OID30573	P30101	Inflammation_II	Timepoint:progression_status	FU1 fast - B slow	-0.313793	-0.94838	0.320793	0.788638	Non-significant	FU1-B	fast-slow
AGER	OID20756	Q15109	Inflammation	Timepoint:progression_status	B fast - FU3 slow	-0.403453	-1.21924	0.412337	0.790164	Non-significant	B-FU3	fast-slow
RAB33A	OID30122	Q14088	Cardiometabolic_II	Timepoint:progression_status	FU1 slow - FU3 slow	-0.188086	-0.566893	0.19072	0.790238	Non-significant	FU1-FU3	slow-slow
AGER	OID20756	Q15109	Inflammation	Timepoint:progression_status	B fast - FU1 slow	-0.343757	-1.04585	0.358334	0.790911	Non-significant	B-FU1	fast-slow
VGF	OID31067	O15240	Neurology_II	Timepoint:progression_status	B fast - FU3 fast	0.447868	-0.458697	1.35443	0.791988	Non-significant	B-FU3	fast-fast
KRT19	OID20596	P08727	Inflammation	Timepoint:progression_status	FU1 fast - B slow	-0.97391	-2.97182	1.024	0.793943	Non-significant	FU1-B	fast-slow
IL17D	OID20481	Q8TAD2	Inflammation	Timepoint:progression_status	B slow - FU1 slow	-0.195996	-0.596955	0.204962	0.796621	Non-significant	B-FU1	slow-slow
GADD45GIP1	OID30237	Q8TAE8	Cardiometabolic_II	Timepoint:progression_status	B fast - FU2 fast	-0.245151	-0.746811	0.256509	0.797354	Non-significant	B-FU2	fast-fast
KRT19	OID20596	P08727	Inflammation	Timepoint:progression_status	FU1 fast - FU2 slow	0.96769	-1.03667	2.97205	0.802048	Non-significant	FU1-FU2	fast-slow
RAB33A	OID30122	Q14088	Cardiometabolic_II	Timepoint:progression_status	FU2 fast - B slow	-0.17761	-0.541158	0.185939	0.803642	Non-significant	FU2-B	fast-slow
INSL3	OID31129	P51460	Neurology_II	Timepoint:progression_status	B fast - B slow	-0.88168	-2.73609	0.972727	0.804661	Non-significant	B-B	fast-slow
AKR7L	OID30488	Q8NHP1	Inflammation_II	Timepoint:progression_status	B slow - FU3 slow	-0.428034	-1.31214	0.456075	0.807524	Non-significant	B-FU3	slow-slow
VGF	OID31067	O15240	Neurology_II	Timepoint:progression_status	FU1 slow - FU3 slow	0.220473	-0.235865	0.676811	0.808803	Non-significant	FU1-FU3	slow-slow
DHODH	OID30137	Q02127	Cardiometabolic_II	Timepoint:progression_status	FU1 fast - FU2 fast	0.264828	-0.285822	0.815478	0.809942	Non-significant	FU1-FU2	fast-fast
BPIFB1	OID20308	Q8TDL5	Cardiometabolic	Timepoint:progression_status	B fast - B slow	0.52621	-0.587107	1.63953	0.812622	Non-significant	B-B	fast-slow
M6PR	OID30208	P20645	Cardiometabolic_II	Timepoint:progression_status	B fast - FU2 slow	0.125365	-0.13767	0.3884	0.812675	Non-significant	B-FU2	fast-slow
KLK4	OID21391	Q9Y5K2	Oncology	Timepoint:progression_status	B slow - FU3 slow	-0.413722	-1.2771	0.449658	0.813142	Non-significant	B-FU3	slow-slow
FABP9	OID20501	Q0Z7S8	Inflammation	Timepoint:progression_status	FU2 slow - FU3 slow	0.200485	-0.21861	0.61958	0.813983	Non-significant	FU2-FU3	slow-slow
RARRES1	OID21177	P49788	Oncology	Timepoint:progression_status	FU1 fast - FU3 fast	-0.43727	-1.35264	0.478104	0.816708	Non-significant	FU1-FU3	fast-fast
UPB1	OID30352	Q9UBR1	Cardiometabolic_II	Timepoint:progression_status	FU2 fast - FU3 slow	-0.907504	-2.80056	0.985551	0.818325	Non-significant	FU2-FU3	fast-slow
PNMA2	OID30842	Q9UL42	Neurology_II	Timepoint:progression_status	B fast - FU2 slow	-0.219638	-0.679397	0.240122	0.821138	Non-significant	B-FU2	fast-slow
RBM17	OID31034	Q96I25	Neurology_II	Timepoint:progression_status	FU1 fast - FU2 slow	-0.354654	-1.09855	0.389238	0.821769	Non-significant	FU1-FU2	fast-slow
CHAD	OID30660	O15335	Inflammation_II	Timepoint:progression_status	FU2 fast - B slow	-0.527985	-1.65593	0.599957	0.825466	Non-significant	FU2-B	fast-slow
SYAP1	OID30636	Q96A49	Inflammation_II	Timepoint:progression_status	FU2 fast - FU3 fast	0.379334	-0.428081	1.18675	0.829929	Non-significant	FU2-FU3	fast-fast
CPM	OID21054	P14384	Neurology	Timepoint:progression_status	FU1 fast - FU3 slow	-0.384715	-1.20832	0.438888	0.834953	Non-significant	FU1-FU3	fast-slow
PRND	OID31124	Q9UKY0	Neurology_II	Timepoint:progression_status	FU1 fast - B slow	0.457201	-0.536152	1.45055	0.836682	Non-significant	FU1-B	fast-slow
IL17D	OID20481	Q8TAD2	Inflammation	Timepoint:progression_status	FU2 fast - FU3 slow	0.434464	-0.499443	1.36837	0.837742	Non-significant	FU2-FU3	fast-slow
CRH	OID21257	P06850	Oncology	Timepoint:progression_status	FU2 fast - B slow	-0.789404	-2.49437	0.915559	0.839396	Non-significant	FU2-B	fast-slow
DHODH	OID30137	Q02127	Cardiometabolic_II	Timepoint:progression_status	B slow - FU2 slow	-0.174187	-0.552374	0.204	0.840211	Non-significant	B-FU2	slow-slow
M6PR	OID30208	P20645	Cardiometabolic_II	Timepoint:progression_status	FU1 fast - FU2 slow	0.120578	-0.142457	0.383613	0.841027	Non-significant	FU1-FU2	fast-slow
PGF	OID20673	P49763	Inflammation	Timepoint:progression_status	B fast - FU2 fast	-0.217198	-0.688602	0.254207	0.841431	Non-significant	B-FU2	fast-fast
INSL3	OID31129	P51460	Neurology_II	Timepoint:progression_status	FU2 fast - FU2 slow	-0.862752	-2.7765	1.051	0.847016	Non-significant	FU2-FU2	fast-slow
EIF4G3	OID31022	O43432	Neurology_II	Timepoint:progression_status	B fast - B slow	0.242022	-0.284093	0.768137	0.84779	Non-significant	B-B	fast-slow
AGR2	OID20896	O95994	Neurology	Timepoint:progression_status	FU1 fast - FU3 slow	-1.21497	-3.86277	1.43283	0.848591	Non-significant	FU1-FU3	fast-slow
PRND	OID31124	Q9UKY0	Neurology_II	Timepoint:progression_status	FU1 fast - FU3 fast	0.713237	-0.849593	2.27607	0.848809	Non-significant	FU1-FU3	fast-fast
LEO1	OID30991	Q8WVC0	Neurology_II	Timepoint:progression_status	FU1 fast - FU3 slow	-0.663832	-2.11865	0.790982	0.850545	Non-significant	FU1-FU3	fast-slow
PGF	OID20673	P49763	Inflammation	Timepoint:progression_status	B fast - FU1 slow	0.291139	-0.356877	0.939156	0.851351	Non-significant	B-FU1	fast-slow
CPM	OID21054	P14384	Neurology	Timepoint:progression_status	FU1 slow - FU3 slow	-0.269538	-0.862888	0.323811	0.851672	Non-significant	FU1-FU3	slow-slow
LEO1	OID30991	Q8WVC0	Neurology_II	Timepoint:progression_status	B slow - FU1 slow	0.3097	-0.37939	0.99879	0.857089	Non-significant	B-FU1	slow-slow
SPINT3	OID31509	P49223	Oncology_II	Timepoint:progression_status	FU3 fast - FU3 slow	-1.08416	-3.47535	1.30703	0.85714	Non-significant	FU3-FU3	fast-slow
SPINT3	OID31509	P49223	Oncology_II	Timepoint:progression_status	FU2 slow - FU3 slow	0.413974	-0.50702	1.33497	0.857695	Non-significant	FU2-FU3	slow-slow
GNE	OID21231	Q9Y223	Oncology	Timepoint:progression_status	B slow - FU1 slow	-0.23803	-0.769052	0.292992	0.857813	Non-significant	B-FU1	slow-slow
SYAP1	OID30636	Q96A49	Inflammation_II	Timepoint:progression_status	B slow - FU2 slow	0.122335	-0.150349	0.395018	0.858371	Non-significant	B-FU2	slow-slow
DHODH	OID30137	Q02127	Cardiometabolic_II	Timepoint:progression_status	FU2 fast - FU1 slow	-0.24938	-0.801463	0.302702	0.858906	Non-significant	FU2-FU1	fast-slow
INSL3	OID31129	P51460	Neurology_II	Timepoint:progression_status	B slow - FU3 slow	0.46352	-0.570248	1.49729	0.859129	Non-significant	B-FU3	slow-slow
IL6	OID20911	P05231	Neurology	Timepoint:progression_status	FU1 fast - B slow	0.679735	-0.844566	2.20404	0.859652	Non-significant	FU1-B	fast-slow
AKR7L	OID30488	Q8NHP1	Inflammation_II	Timepoint:progression_status	FU2 fast - FU3 slow	-0.504878	-1.62645	0.616689	0.861793	Non-significant	FU2-FU3	fast-slow
FABP9	OID20501	Q0Z7S8	Inflammation	Timepoint:progression_status	B fast - FU3 slow	-0.375447	-1.22583	0.474932	0.86293	Non-significant	B-FU3	fast-slow
PGF	OID20673	P49763	Inflammation	Timepoint:progression_status	FU1 fast - B slow	0.284653	-0.363363	0.93267	0.865396	Non-significant	FU1-B	fast-slow
AKR7L	OID30488	Q8NHP1	Inflammation_II	Timepoint:progression_status	FU2 fast - FU1 slow	-0.411489	-1.33499	0.51201	0.867147	Non-significant	FU2-FU1	fast-slow
DHODH	OID30137	Q02127	Cardiometabolic_II	Timepoint:progression_status	FU2 fast - FU3 fast	-0.486372	-1.58032	0.60758	0.867213	Non-significant	FU2-FU3	fast-fast
BPIFB1	OID20308	Q8TDL5	Cardiometabolic	Timepoint:progression_status	FU2 fast - FU3 slow	0.559054	-0.705735	1.82384	0.86755	Non-significant	FU2-FU3	fast-slow
CRH	OID21257	P06850	Oncology	Timepoint:progression_status	B fast - FU1 fast	-0.563587	-1.84667	0.719499	0.871002	Non-significant	B-FU1	fast-fast
AKR7L	OID30488	Q8NHP1	Inflammation_II	Timepoint:progression_status	B fast - FU1 slow	0.368301	-0.469748	1.20635	0.874368	Non-significant	B-FU1	fast-slow
MME	OID21307	P08473	Oncology	Timepoint:progression_status	FU1 slow - FU3 slow	-0.441413	-1.45429	0.571459	0.876385	Non-significant	FU1-FU3	slow-slow
SPTBN2	OID30876	O15020	Neurology_II	Timepoint:progression_status	B fast - FU1 slow	0.251949	-0.322211	0.826108	0.876865	Non-significant	B-FU1	fast-slow
INSL3	OID31129	P51460	Neurology_II	Timepoint:progression_status	FU3 fast - FU3 slow	-1.19384	-3.91633	1.52866	0.877031	Non-significant	FU3-FU3	fast-slow
SPTBN2	OID30876	O15020	Neurology_II	Timepoint:progression_status	B slow - FU2 slow	-0.207024	-0.682936	0.268889	0.877376	Non-significant	B-FU2	slow-slow
ARAF	OID31260	P10398	Oncology_II	Timepoint:progression_status	FU1 fast - FU2 fast	0.298176	-0.388113	0.984465	0.878141	Non-significant	FU1-FU2	fast-fast
NGRN	OID31115	Q9NPE2	Neurology_II	Timepoint:progression_status	B slow - FU1 slow	0.105315	-0.138088	0.348718	0.879464	Non-significant	B-FU1	slow-slow
IL17D	OID20481	Q8TAD2	Inflammation	Timepoint:progression_status	B fast - FU2 slow	-0.335608	-1.11724	0.446027	0.880454	Non-significant	B-FU2	fast-slow
CHAD	OID30660	O15335	Inflammation_II	Timepoint:progression_status	FU2 slow - FU3 slow	0.323675	-0.427126	1.07447	0.882263	Non-significant	FU2-FU3	slow-slow
GNE	OID21231	Q9Y223	Oncology	Timepoint:progression_status	FU1 slow - FU3 slow	0.323615	-0.428543	1.07577	0.885921	Non-significant	FU1-FU3	slow-slow
GADD45GIP1	OID30237	Q8TAE8	Cardiometabolic_II	Timepoint:progression_status	FU1 fast - FU3 fast	-0.429811	-1.43081	0.571182	0.886061	Non-significant	FU1-FU3	fast-fast
AKR7L	OID30488	Q8NHP1	Inflammation_II	Timepoint:progression_status	B slow - FU2 slow	-0.261283	-0.872782	0.350215	0.887025	Non-significant	B-FU2	slow-slow
NGRN	OID31115	Q9NPE2	Neurology_II	Timepoint:progression_status	FU1 fast - FU3 fast	-0.307111	-1.024	0.409779	0.887577	Non-significant	FU1-FU3	fast-fast
IL6	OID20911	P05231	Neurology	Timepoint:progression_status	FU3 fast - FU3 slow	1.25064	-1.67168	4.17296	0.890145	Non-significant	FU3-FU3	fast-slow
GNE	OID21231	Q9Y223	Oncology	Timepoint:progression_status	FU2 fast - FU3 slow	0.38479	-0.514594	1.28417	0.890581	Non-significant	FU2-FU3	fast-slow
RBM17	OID31034	Q96I25	Neurology_II	Timepoint:progression_status	FU2 fast - B slow	0.350795	-0.47006	1.17165	0.890837	Non-significant	FU2-B	fast-slow
RAB33A	OID30122	Q14088	Cardiometabolic_II	Timepoint:progression_status	B slow - FU3 slow	-0.161672	-0.540478	0.217135	0.891856	Non-significant	B-FU3	slow-slow
DHODH	OID30137	Q02127	Cardiometabolic_II	Timepoint:progression_status	FU1 slow - FU3 slow	0.229636	-0.31297	0.772242	0.893434	Non-significant	FU1-FU3	slow-slow
IL6	OID21276	P05231	Oncology	Timepoint:progression_status	FU3 fast - FU3 slow	1.24071	-1.67974	4.16116	0.893851	Non-significant	FU3-FU3	fast-slow
PNMA2	OID30842	Q9UL42	Neurology_II	Timepoint:progression_status	FU2 fast - FU1 slow	0.215663	-0.293507	0.724833	0.895664	Non-significant	FU2-FU1	fast-slow
AGR2	OID20896	O95994	Neurology	Timepoint:progression_status	FU2 fast - FU3 slow	1.18362	-1.62078	3.98801	0.896945	Non-significant	FU2-FU3	fast-slow
DHODH	OID30137	Q02127	Cardiometabolic_II	Timepoint:progression_status	FU2 fast - FU2 slow	-0.233656	-0.788205	0.320892	0.897567	Non-significant	FU2-FU2	fast-slow
MME	OID21307	P08473	Oncology	Timepoint:progression_status	FU1 fast - FU3 slow	-0.631529	-2.14088	0.877817	0.898407	Non-significant	FU1-FU3	fast-slow
LEO1	OID30991	Q8WVC0	Neurology_II	Timepoint:progression_status	B fast - FU3 slow	0.609688	-0.845126	2.0645	0.898681	Non-significant	B-FU3	fast-slow
RAB33A	OID30122	Q14088	Cardiometabolic_II	Timepoint:progression_status	FU1 fast - FU2 fast	0.164415	-0.22637	0.555199	0.898925	Non-significant	FU1-FU2	fast-fast
LEO1	OID30991	Q8WVC0	Neurology_II	Timepoint:progression_status	FU1 slow - FU2 slow	0.289782	-0.408041	0.987606	0.900618	Non-significant	FU1-FU2	slow-slow
KRT19	OID20596	P08727	Inflammation	Timepoint:progression_status	FU2 fast - FU3 slow	1.0113	-1.41628	3.43888	0.902054	Non-significant	FU2-FU3	fast-slow
SLC9A3R1	OID30630	O14745	Inflammation_II	Timepoint:progression_status	B slow - FU3 slow	-0.341253	-1.16323	0.480722	0.902671	Non-significant	B-FU3	slow-slow
CBX2	OID30177	Q14781	Cardiometabolic_II	Timepoint:progression_status	FU1 fast - FU1 slow	-0.197975	-0.674532	0.278582	0.903989	Non-significant	FU1-FU1	fast-slow
RAB33A	OID30122	Q14088	Cardiometabolic_II	Timepoint:progression_status	FU2 fast - FU1 slow	-0.151195	-0.514743	0.212353	0.904361	Non-significant	FU2-FU1	fast-slow
RAB33A	OID30122	Q14088	Cardiometabolic_II	Timepoint:progression_status	FU1 fast - FU3 slow	-0.174867	-0.595448	0.245715	0.904486	Non-significant	FU1-FU3	fast-slow
CRH	OID21257	P06850	Oncology	Timepoint:progression_status	B fast - B slow	-0.647904	-2.2296	0.933788	0.906293	Non-significant	B-B	fast-slow
SPTBN2	OID30876	O15020	Neurology_II	Timepoint:progression_status	FU1 slow - FU3 slow	0.274139	-0.391176	0.939455	0.907515	Non-significant	FU1-FU3	slow-slow
DHODH	OID30137	Q02127	Cardiometabolic_II	Timepoint:progression_status	FU1 fast - B slow	0.205359	-0.29379	0.704508	0.908006	Non-significant	FU1-B	fast-slow
GNE	OID21231	Q9Y223	Oncology	Timepoint:progression_status	FU2 fast - B slow	0.299205	-0.428506	1.02692	0.909369	Non-significant	FU2-B	fast-slow
CRH	OID21257	P06850	Oncology	Timepoint:progression_status	B slow - FU3 slow	0.581722	-0.844082	2.00753	0.909734	Non-significant	B-FU3	slow-slow
LEO1	OID30991	Q8WVC0	Neurology_II	Timepoint:progression_status	FU2 fast - FU3 fast	0.858268	-1.24768	2.96421	0.910227	Non-significant	FU2-FU3	fast-fast
CPM	OID21054	P14384	Neurology	Timepoint:progression_status	FU3 fast - B slow	-0.523604	-1.79981	0.752604	0.910265	Non-significant	FU3-B	fast-slow
CHCHD6	OID31426	Q9BRQ6	Oncology_II	Timepoint:progression_status	B slow - FU2 slow	0.184248	-0.269325	0.63782	0.910712	Non-significant	B-FU2	slow-slow
RARRES1	OID21177	P49788	Oncology	Timepoint:progression_status	B slow - FU2 slow	0.124308	-0.182463	0.431079	0.911865	Non-significant	B-FU2	slow-slow
DHODH	OID30137	Q02127	Cardiometabolic_II	Timepoint:progression_status	FU3 fast - FU3 slow	0.466627	-0.678813	1.61207	0.913186	Non-significant	FU3-FU3	fast-slow
UPB1	OID30352	Q9UBR1	Cardiometabolic_II	Timepoint:progression_status	B fast - FU1 slow	-0.578079	-2.0024	0.846245	0.913199	Non-significant	B-FU1	fast-slow
AGER	OID20756	Q15109	Inflammation	Timepoint:progression_status	B fast - FU2 fast	-0.231574	-0.805346	0.342197	0.913858	Non-significant	B-FU2	fast-fast
AGER	OID20756	Q15109	Inflammation	Timepoint:progression_status	FU1 fast - FU3 slow	-0.329473	-1.14526	0.486317	0.915155	Non-significant	FU1-FU3	fast-slow
UPB1	OID30352	Q9UBR1	Cardiometabolic_II	Timepoint:progression_status	FU3 fast - B slow	-1.20828	-4.19045	1.77389	0.915449	Non-significant	FU3-B	fast-slow
SPINT3	OID31509	P49223	Oncology_II	Timepoint:progression_status	FU2 fast - FU3 slow	-0.709851	-2.49084	1.07114	0.917189	Non-significant	FU2-FU3	fast-slow
EIF4G3	OID31022	O43432	Neurology_II	Timepoint:progression_status	B fast - FU1 slow	0.211763	-0.314352	0.737878	0.918303	Non-significant	B-FU1	fast-slow
SLC9A3R1	OID30630	O14745	Inflammation_II	Timepoint:progression_status	B slow - FU1 slow	-0.223837	-0.786211	0.338537	0.918843	Non-significant	B-FU1	slow-slow
AGR2	OID20896	O95994	Neurology	Timepoint:progression_status	FU1 fast - FU1 slow	0.869326	-1.31946	3.05811	0.920255	Non-significant	FU1-FU1	fast-slow
NGRN	OID31115	Q9NPE2	Neurology_II	Timepoint:progression_status	FU3 fast - FU1 slow	0.29228	-0.439977	1.02454	0.921418	Non-significant	FU3-FU1	fast-slow
DHODH	OID30137	Q02127	Cardiometabolic_II	Timepoint:progression_status	FU3 fast - B slow	0.426902	-0.65043	1.50423	0.924281	Non-significant	FU3-B	fast-slow
CHCHD6	OID31426	Q9BRQ6	Oncology_II	Timepoint:progression_status	FU2 fast - FU3 fast	0.531495	-0.817532	1.88052	0.924552	Non-significant	FU2-FU3	fast-fast
LEP	OID20187	P41159	Cardiometabolic	Timepoint:progression_status	FU1 fast - FU3 fast	0.752951	-1.16346	2.66936	0.924882	Non-significant	FU1-FU3	fast-fast
DHODH	OID30137	Q02127	Cardiometabolic_II	Timepoint:progression_status	FU2 slow - FU3 slow	0.213912	-0.330861	0.758685	0.925776	Non-significant	FU2-FU3	slow-slow
UPB1	OID30352	Q9UBR1	Cardiometabolic_II	Timepoint:progression_status	FU1 fast - FU3 slow	-0.701544	-2.47912	1.07603	0.925794	Non-significant	FU1-FU3	fast-slow
BPIFB1	OID20308	Q8TDL5	Cardiometabolic	Timepoint:progression_status	B slow - FU1 slow	-0.181507	-0.649111	0.286097	0.928578	Non-significant	B-FU1	slow-slow
GADD45GIP1	OID30237	Q8TAE8	Cardiometabolic_II	Timepoint:progression_status	FU3 fast - FU1 slow	0.402301	-0.627875	1.43248	0.929529	Non-significant	FU3-FU1	fast-slow
AGER	OID20756	Q15109	Inflammation	Timepoint:progression_status	FU1 fast - FU1 slow	-0.269777	-0.971867	0.432314	0.930147	Non-significant	FU1-FU1	fast-slow
PRND	OID31124	Q9UKY0	Neurology_II	Timepoint:progression_status	FU3 fast - FU1 slow	-0.664944	-2.37417	1.04429	0.931091	Non-significant	FU3-FU1	fast-slow
SPTBN2	OID30876	O15020	Neurology_II	Timepoint:progression_status	FU2 fast - FU1 slow	-0.24865	-0.888168	0.390868	0.931292	Non-significant	FU2-FU1	fast-slow
CBX2	OID30177	Q14781	Cardiometabolic_II	Timepoint:progression_status	FU1 fast - B slow	-0.184775	-0.661332	0.291782	0.931613	Non-significant	FU1-B	fast-slow
DHODH	OID30137	Q02127	Cardiometabolic_II	Timepoint:progression_status	FU1 fast - FU3 slow	0.245084	-0.387235	0.877403	0.932321	Non-significant	FU1-FU3	fast-slow
M6PR	OID30208	P20645	Cardiometabolic_II	Timepoint:progression_status	B fast - FU1 slow	0.0999552	-0.162219	0.362129	0.932761	Non-significant	B-FU1	fast-slow
SPTBN2	OID30876	O15020	Neurology_II	Timepoint:progression_status	FU1 fast - FU2 slow	-0.221982	-0.799554	0.355589	0.935173	Non-significant	FU1-FU2	fast-slow
CHCHD6	OID31426	Q9BRQ6	Oncology_II	Timepoint:progression_status	FU3 fast - FU2 slow	0.52785	-0.847269	1.90297	0.935412	Non-significant	FU3-FU2	fast-slow
IL17D	OID20481	Q8TAD2	Inflammation	Timepoint:progression_status	FU2 fast - FU1 slow	0.312927	-0.512213	1.13807	0.935872	Non-significant	FU2-FU1	fast-slow
UPB1	OID30352	Q9UBR1	Cardiometabolic_II	Timepoint:progression_status	FU1 slow - FU3 slow	0.562868	-0.913803	2.03954	0.936086	Non-significant	FU1-FU3	slow-slow
SLC9A3R1	OID30630	O14745	Inflammation_II	Timepoint:progression_status	B fast - FU3 fast	0.622858	-1.01295	2.25866	0.937033	Non-significant	B-FU3	fast-fast
CHCHD6	OID31426	Q9BRQ6	Oncology_II	Timepoint:progression_status	B fast - FU3 fast	0.505275	-0.825522	1.83607	0.937489	Non-significant	B-FU3	fast-fast
BGLAP	OID30389	P02818	Cardiometabolic_II	Timepoint:progression_status	B fast - FU1 slow	-0.517998	-1.89318	0.857182	0.937592	Non-significant	B-FU1	fast-slow
UPB1	OID30352	Q9UBR1	Cardiometabolic_II	Timepoint:progression_status	FU1 slow - FU2 slow	-0.384123	-1.40255	0.634299	0.938176	Non-significant	FU1-FU2	slow-slow
RBM17	OID31034	Q96I25	Neurology_II	Timepoint:progression_status	B fast - FU2 fast	-0.317579	-1.15816	0.523002	0.938405	Non-significant	B-FU2	fast-fast
LEO1	OID30991	Q8WVC0	Neurology_II	Timepoint:progression_status	FU1 fast - FU3 fast	-0.786433	-2.86775	1.29489	0.938442	Non-significant	FU1-FU3	fast-fast
RBM17	OID31034	Q96I25	Neurology_II	Timepoint:progression_status	B slow - FU2 slow	0.217716	-0.360989	0.796422	0.939063	Non-significant	B-FU2	slow-slow
CPM	OID21054	P14384	Neurology	Timepoint:progression_status	B fast - FU2 slow	-0.264247	-0.970036	0.441541	0.939208	Non-significant	B-FU2	fast-slow
METAP1D	OID20519	Q6UB28	Inflammation	Timepoint:progression_status	FU1 fast - FU3 slow	-0.750602	-2.73336	1.23215	0.939704	Non-significant	FU1-FU3	fast-slow
KRT19	OID20596	P08727	Inflammation	Timepoint:progression_status	B fast - FU3 slow	0.872104	-1.44176	3.18597	0.939819	Non-significant	B-FU3	fast-slow
METAP1D	OID20519	Q6UB28	Inflammation	Timepoint:progression_status	FU1 fast - FU3 fast	-1.19486	-4.37313	1.98342	0.940629	Non-significant	FU1-FU3	fast-fast
INSL3	OID31129	P51460	Neurology_II	Timepoint:progression_status	B slow - FU2 slow	0.257866	-0.432557	0.948289	0.941151	Non-significant	B-FU2	slow-slow
CHCHD6	OID31426	Q9BRQ6	Oncology_II	Timepoint:progression_status	FU1 fast - FU2 slow	0.259658	-0.434664	0.95398	0.94141	Non-significant	FU1-FU2	fast-slow
MME	OID21307	P08473	Oncology	Timepoint:progression_status	B slow - FU3 slow	-0.378213	-1.39109	0.634659	0.941631	Non-significant	B-FU3	slow-slow
INSL3	OID31129	P51460	Neurology_II	Timepoint:progression_status	B fast - FU3 fast	0.775677	-1.31863	2.86998	0.943949	Non-significant	B-FU3	fast-fast
GADD45GIP1	OID30237	Q8TAE8	Cardiometabolic_II	Timepoint:progression_status	B slow - FU1 slow	0.124893	-0.212965	0.46275	0.944017	Non-significant	B-FU1	slow-slow
CPM	OID21054	P14384	Neurology	Timepoint:progression_status	FU2 fast - FU3 slow	-0.322346	-1.18867	0.543978	0.944421	Non-significant	FU2-FU3	fast-slow
CBX2	OID30177	Q14781	Cardiometabolic_II	Timepoint:progression_status	FU1 fast - FU2 slow	-0.177471	-0.656672	0.30173	0.945939	Non-significant	FU1-FU2	fast-slow
CRH	OID21257	P06850	Oncology	Timepoint:progression_status	FU1 fast - FU1 slow	-0.578429	-2.16012	1.00326	0.946801	Non-significant	FU1-FU1	fast-slow
M6PR	OID30208	P20645	Cardiometabolic_II	Timepoint:progression_status	FU1 fast - FU1 slow	0.0951685	-0.167006	0.357343	0.947661	Non-significant	FU1-FU1	fast-slow
GADD45GIP1	OID30237	Q8TAE8	Cardiometabolic_II	Timepoint:progression_status	FU2 fast - FU3 fast	0.3709	-0.644017	1.38582	0.948495	Non-significant	FU2-FU3	fast-fast
IL17D	OID20481	Q8TAD2	Inflammation	Timepoint:progression_status	FU1 fast - FU2 slow	-0.282375	-1.06401	0.499261	0.948676	Non-significant	FU1-FU2	fast-slow
NGRN	OID31115	Q9NPE2	Neurology_II	Timepoint:progression_status	B fast - FU3 fast	0.261683	-0.455207	0.978572	0.949094	Non-significant	B-FU3	fast-fast
BGLAP	OID30389	P02818	Cardiometabolic_II	Timepoint:progression_status	FU1 fast - FU1 slow	-0.497358	-1.87254	0.877822	0.949374	Non-significant	FU1-FU1	fast-slow
CHAD	OID30660	O15335	Inflammation_II	Timepoint:progression_status	B fast - B slow	-0.384769	-1.46164	0.692099	0.949969	Non-significant	B-B	fast-slow
CPM	OID21054	P14384	Neurology	Timepoint:progression_status	B fast - FU2 fast	0.214423	-0.377484	0.806331	0.950095	Non-significant	B-FU2	fast-fast
AKR7L	OID30488	Q8NHP1	Inflammation_II	Timepoint:progression_status	FU2 fast - FU2 slow	-0.338128	-1.26562	0.589365	0.95027	Non-significant	FU2-FU2	fast-slow
LEO1	OID30991	Q8WVC0	Neurology_II	Timepoint:progression_status	B fast - FU2 fast	-0.371181	-1.40144	0.659077	0.951428	Non-significant	B-FU2	fast-fast
AGR2	OID20896	O95994	Neurology	Timepoint:progression_status	FU3 fast - B slow	1.5493	-2.73746	5.83606	0.952737	Non-significant	FU3-B	fast-slow
PGF	OID20673	P49763	Inflammation	Timepoint:progression_status	B slow - FU3 slow	-0.169812	-0.643673	0.30405	0.9529	Non-significant	B-FU3	slow-slow
MME	OID21307	P08473	Oncology	Timepoint:progression_status	FU3 fast - B slow	-0.810188	-3.05753	1.43715	0.953509	Non-significant	FU3-B	fast-slow
SLC9A3R1	OID30630	O14745	Inflammation_II	Timepoint:progression_status	FU2 fast - FU2 slow	0.310241	-0.553195	1.17368	0.953851	Non-significant	FU2-FU2	fast-slow
PNMA2	OID30842	Q9UL42	Neurology_II	Timepoint:progression_status	B slow - FU1 slow	0.134678	-0.240367	0.509723	0.954488	Non-significant	B-FU1	slow-slow
SLC9A3R1	OID30630	O14745	Inflammation_II	Timepoint:progression_status	B fast - FU3 slow	0.35092	-0.628106	1.32995	0.954824	Non-significant	B-FU3	fast-slow
GADD45GIP1	OID30237	Q8TAE8	Cardiometabolic_II	Timepoint:progression_status	FU3 fast - FU2 slow	0.367077	-0.664295	1.39845	0.956406	Non-significant	FU3-FU2	fast-slow
LEP	OID20187	P41159	Cardiometabolic	Timepoint:progression_status	FU2 fast - FU3 fast	0.677131	-1.26011	2.61437	0.958855	Non-significant	FU2-FU3	fast-fast
BPIFB1	OID20308	Q8TDL5	Cardiometabolic	Timepoint:progression_status	B fast - FU1 fast	0.216813	-0.410543	0.84417	0.960894	Non-significant	B-FU1	fast-fast
IL6	OID20911	P05231	Neurology	Timepoint:progression_status	B fast - FU3 slow	0.619318	-1.16537	2.40401	0.961239	Non-significant	B-FU3	fast-slow
PDIA3	OID30573	P30101	Inflammation_II	Timepoint:progression_status	FU3 fast - FU2 slow	0.446766	-0.837344	1.73088	0.961404	Non-significant	FU3-FU2	fast-slow
PNMA2	OID30842	Q9UL42	Neurology_II	Timepoint:progression_status	B fast - FU1 fast	-0.17502	-0.678196	0.328156	0.961622	Non-significant	B-FU1	fast-fast
RBM17	OID31034	Q96I25	Neurology_II	Timepoint:progression_status	B slow - FU1 slow	0.196893	-0.375942	0.769727	0.961993	Non-significant	B-FU1	slow-slow
FABP9	OID20501	Q0Z7S8	Inflammation	Timepoint:progression_status	B fast - FU2 fast	0.142641	-0.272167	0.557449	0.962	Non-significant	B-FU2	fast-fast
INSL3	OID31129	P51460	Neurology_II	Timepoint:progression_status	B fast - FU2 slow	-0.623814	-2.48104	1.23342	0.962538	Non-significant	B-FU2	fast-slow
CBX2	OID30177	Q14781	Cardiometabolic_II	Timepoint:progression_status	FU1 fast - FU3 slow	0.20778	-0.396959	0.81252	0.964053	Non-significant	FU1-FU3	fast-slow
MME	OID21307	P08473	Oncology	Timepoint:progression_status	FU2 fast - B slow	-0.471528	-1.86917	0.92611	0.964992	Non-significant	FU2-B	fast-slow
SLC9A3R1	OID30630	O14745	Inflammation_II	Timepoint:progression_status	FU1 fast - B slow	-0.265807	-1.04636	0.514743	0.96502	Non-significant	FU1-B	fast-slow
EIF4G3	OID31022	O43432	Neurology_II	Timepoint:progression_status	B fast - FU1 fast	0.195293	-0.381774	0.772361	0.965086	Non-significant	B-FU1	fast-fast
SYAP1	OID30636	Q96A49	Inflammation_II	Timepoint:progression_status	FU1 slow - FU2 slow	0.0920383	-0.180646	0.364722	0.965531	Non-significant	FU1-FU2	slow-slow
KLK4	OID21391	Q9Y5K2	Oncology	Timepoint:progression_status	FU1 slow - FU3 slow	-0.291266	-1.15465	0.572113	0.965908	Non-significant	FU1-FU3	slow-slow
NGRN	OID31115	Q9NPE2	Neurology_II	Timepoint:progression_status	FU3 fast - FU2 slow	0.249129	-0.483983	0.98224	0.966029	Non-significant	FU3-FU2	fast-slow
VGF	OID31067	O15240	Neurology_II	Timepoint:progression_status	B slow - FU1 slow	-0.105344	-0.418711	0.208022	0.966157	Non-significant	B-FU1	slow-slow
UPB1	OID30352	Q9UBR1	Cardiometabolic_II	Timepoint:progression_status	FU1 fast - FU3 fast	0.991994	-1.95107	3.93505	0.966904	Non-significant	FU1-FU3	fast-fast
NGRN	OID31115	Q9NPE2	Neurology_II	Timepoint:progression_status	FU1 fast - B slow	-0.120145	-0.478096	0.237805	0.967242	Non-significant	FU1-B	fast-slow
RBM17	OID31034	Q96I25	Neurology_II	Timepoint:progression_status	B fast - FU2 slow	0.250933	-0.492959	0.994824	0.967268	Non-significant	B-FU2	fast-slow
SYAP1	OID30636	Q96A49	Inflammation_II	Timepoint:progression_status	B fast - FU3 fast	0.265837	-0.530243	1.06192	0.968384	Non-significant	B-FU3	fast-fast
RAB33A	OID30122	Q14088	Cardiometabolic_II	Timepoint:progression_status	FU2 slow - FU3 slow	-0.127714	-0.508321	0.252893	0.968444	Non-significant	FU2-FU3	slow-slow
PDIA3	OID30573	P30101	Inflammation_II	Timepoint:progression_status	FU2 fast - FU3 fast	0.422574	-0.845483	1.69063	0.968641	Non-significant	FU2-FU3	fast-fast
MME	OID21307	P08473	Oncology	Timepoint:progression_status	FU3 fast - FU1 slow	-0.746988	-2.99433	1.50035	0.970034	Non-significant	FU3-FU1	fast-slow
UPB1	OID30352	Q9UBR1	Cardiometabolic_II	Timepoint:progression_status	B fast - B slow	0.470047	-0.954276	1.89437	0.970453	Non-significant	B-B	fast-slow
PGF	OID20673	P49763	Inflammation	Timepoint:progression_status	FU1 fast - FU1 slow	0.210213	-0.437804	0.858229	0.970538	Non-significant	FU1-FU1	fast-slow
UPB1	OID30352	Q9UBR1	Cardiometabolic_II	Timepoint:progression_status	B slow - FU3 slow	-0.485258	-1.96193	0.991412	0.970934	Non-significant	B-FU3	slow-slow
M6PR	OID30208	P20645	Cardiometabolic_II	Timepoint:progression_status	B fast - B slow	0.085107	-0.177067	0.347281	0.971229	Non-significant	B-B	fast-slow
RAB33A	OID30122	Q14088	Cardiometabolic_II	Timepoint:progression_status	B fast - FU2 slow	-0.108312	-0.436582	0.219957	0.971245	Non-significant	B-FU2	fast-slow
LEO1	OID30991	Q8WVC0	Neurology_II	Timepoint:progression_status	FU3 fast - FU2 slow	0.736845	-1.50153	2.97522	0.971559	Non-significant	FU3-FU2	fast-slow
SPINT3	OID31509	P49223	Oncology_II	Timepoint:progression_status	B fast - FU1 slow	-0.510471	-2.11372	1.09278	0.972146	Non-significant	B-FU1	fast-slow
BPIFB1	OID20308	Q8TDL5	Cardiometabolic	Timepoint:progression_status	FU1 slow - FU3 slow	-0.22958	-0.937493	0.478332	0.972527	Non-significant	FU1-FU3	slow-slow
INSL3	OID31129	P51460	Neurology_II	Timepoint:progression_status	FU2 fast - FU3 slow	-0.657098	-2.7058	1.3916	0.973267	Non-significant	FU2-FU3	fast-slow
KLK4	OID21391	Q9Y5K2	Oncology	Timepoint:progression_status	B slow - FU2 slow	0.186456	-0.392213	0.765125	0.973355	Non-significant	B-FU2	slow-slow
RBM17	OID31034	Q96I25	Neurology_II	Timepoint:progression_status	FU1 fast - FU3 slow	-0.306377	-1.25089	0.638135	0.973827	Non-significant	FU1-FU3	fast-slow
RBM17	OID31034	Q96I25	Neurology_II	Timepoint:progression_status	B slow - FU3 slow	0.265993	-0.558535	1.09052	0.974024	Non-significant	B-FU3	slow-slow
SPTBN2	OID30876	O15020	Neurology_II	Timepoint:progression_status	FU3 fast - FU1 slow	-0.411449	-1.69161	0.86871	0.97516	Non-significant	FU3-FU1	fast-slow
FABP9	OID20501	Q0Z7S8	Inflammation	Timepoint:progression_status	FU1 slow - FU3 slow	0.132534	-0.285588	0.550655	0.975746	Non-significant	FU1-FU3	slow-slow
METAP1D	OID20519	Q6UB28	Inflammation	Timepoint:progression_status	FU2 slow - FU3 slow	-0.50356	-2.09749	1.09037	0.976539	Non-significant	FU2-FU3	slow-slow
SLC9A3R1	OID30630	O14745	Inflammation_II	Timepoint:progression_status	B slow - FU2 slow	-0.178912	-0.747487	0.389663	0.97658	Non-significant	B-FU2	slow-slow
BPIFB1	OID20308	Q8TDL5	Cardiometabolic	Timepoint:progression_status	B fast - FU1 slow	0.344702	-0.768615	1.45802	0.976647	Non-significant	B-FU1	fast-slow
AGR2	OID20896	O95994	Neurology	Timepoint:progression_status	B fast - FU3 slow	0.837613	-1.81019	3.48541	0.977045	Non-significant	B-FU3	fast-slow
RBM17	OID31034	Q96I25	Neurology_II	Timepoint:progression_status	B fast - FU3 slow	0.29921	-0.645303	1.24372	0.977086	Non-significant	B-FU3	fast-slow
LEO1	OID30991	Q8WVC0	Neurology_II	Timepoint:progression_status	FU1 slow - FU3 slow	-0.324461	-1.35772	0.7088	0.977137	Non-significant	FU1-FU3	slow-slow
FABP9	OID20501	Q0Z7S8	Inflammation	Timepoint:progression_status	B slow - FU1 slow	-0.0859852	-0.361216	0.189245	0.977554	Non-significant	B-FU1	slow-slow
RBM17	OID31034	Q96I25	Neurology_II	Timepoint:progression_status	B fast - FU1 slow	0.230109	-0.509561	0.969779	0.979163	Non-significant	B-FU1	fast-slow
M6PR	OID30208	P20645	Cardiometabolic_II	Timepoint:progression_status	FU1 fast - B slow	0.0803203	-0.181854	0.342494	0.979183	Non-significant	FU1-B	fast-slow
CHCHD6	OID31426	Q9BRQ6	Oncology_II	Timepoint:progression_status	FU3 fast - FU1 slow	0.42695	-0.946577	1.80048	0.979344	Non-significant	FU3-FU1	fast-slow
PGF	OID20673	P49763	Inflammation	Timepoint:progression_status	FU1 slow - FU2 slow	-0.0975795	-0.415979	0.22082	0.979866	Non-significant	FU1-FU2	slow-slow
SLC9A3R1	OID30630	O14745	Inflammation_II	Timepoint:progression_status	FU2 fast - FU1 slow	0.265316	-0.594416	1.12505	0.980016	Non-significant	FU2-FU1	fast-slow
CHAD	OID30660	O15335	Inflammation_II	Timepoint:progression_status	FU1 fast - FU3 slow	-0.366741	-1.56999	0.836503	0.980471	Non-significant	FU1-FU3	fast-slow
AGR2	OID20896	O95994	Neurology	Timepoint:progression_status	B slow - FU3 slow	-0.6281	-2.68859	1.43239	0.980824	Non-significant	B-FU3	slow-slow
EIF4G3	OID31022	O43432	Neurology_II	Timepoint:progression_status	B fast - FU2 fast	0.190897	-0.436401	0.818195	0.980991	Non-significant	B-FU2	fast-fast
AKR7L	OID30488	Q8NHP1	Inflammation_II	Timepoint:progression_status	B fast - FU3 fast	0.53545	-1.224	2.2949	0.981411	Non-significant	B-FU3	fast-fast
PNMA2	OID30842	Q9UL42	Neurology_II	Timepoint:progression_status	FU1 slow - FU2 slow	-0.115369	-0.494004	0.263267	0.981654	Non-significant	FU1-FU2	slow-slow
SPINT3	OID31509	P49223	Oncology_II	Timepoint:progression_status	B fast - B slow	-0.47333	-2.07658	1.12992	0.981762	Non-significant	B-B	fast-slow
PGF	OID20673	P49763	Inflammation	Timepoint:progression_status	B fast - FU2 slow	0.19356	-0.456167	0.843287	0.981762	Non-significant	B-FU2	fast-slow
ARAF	OID31260	P10398	Oncology_II	Timepoint:progression_status	B fast - FU2 fast	0.206283	-0.480006	0.892572	0.982127	Non-significant	B-FU2	fast-fast
CHAD	OID30660	O15335	Inflammation_II	Timepoint:progression_status	FU1 slow - FU3 slow	-0.224475	-0.973347	0.524397	0.98238	Non-significant	FU1-FU3	slow-slow
PDIA3	OID30573	P30101	Inflammation_II	Timepoint:progression_status	FU3 fast - FU3 slow	0.406356	-0.954727	1.76744	0.983584	Non-significant	FU3-FU3	fast-slow
GADD45GIP1	OID30237	Q8TAE8	Cardiometabolic_II	Timepoint:progression_status	FU1 fast - B slow	-0.152403	-0.667117	0.362311	0.98366	Non-significant	FU1-B	fast-slow
CHAD	OID30660	O15335	Inflammation_II	Timepoint:progression_status	B slow - FU1 slow	-0.146237	-0.642102	0.349628	0.983821	Non-significant	B-FU1	slow-slow
MME	OID21307	P08473	Oncology	Timepoint:progression_status	FU2 fast - FU1 slow	-0.408328	-1.80597	0.98931	0.984384	Non-significant	FU2-FU1	fast-slow
IL6	OID21276	P05231	Oncology	Timepoint:progression_status	B fast - FU3 fast	-0.761484	-3.35378	1.83082	0.984519	Non-significant	B-FU3	fast-fast
METAP1D	OID20519	Q6UB28	Inflammation	Timepoint:progression_status	B slow - FU3 slow	-0.465817	-2.05439	1.12276	0.984689	Non-significant	B-FU3	slow-slow
NGRN	OID31115	Q9NPE2	Neurology_II	Timepoint:progression_status	FU3 fast - FU3 slow	0.229014	-0.548338	1.00637	0.984803	Non-significant	FU3-FU3	fast-slow
PNMA2	OID30842	Q9UL42	Neurology_II	Timepoint:progression_status	B fast - FU3 slow	-0.173243	-0.762291	0.415804	0.985047	Non-significant	B-FU3	fast-slow
VGF	OID31067	O15240	Neurology_II	Timepoint:progression_status	FU2 slow - FU3 slow	0.132827	-0.325273	0.590928	0.985749	Non-significant	FU2-FU3	slow-slow
METAP1D	OID20519	Q6UB28	Inflammation	Timepoint:progression_status	FU3 fast - FU2 slow	0.947816	-2.31845	4.21408	0.986107	Non-significant	FU3-FU2	fast-slow
CBX2	OID30177	Q14781	Cardiometabolic_II	Timepoint:progression_status	FU1 fast - FU2 fast	-0.15087	-0.678444	0.376703	0.986753	Non-significant	FU1-FU2	fast-fast
PDIA3	OID30573	P30101	Inflammation_II	Timepoint:progression_status	FU3 fast - FU1 slow	0.369022	-0.913595	1.65164	0.986786	Non-significant	FU3-FU1	fast-slow
ARAF	OID31260	P10398	Oncology_II	Timepoint:progression_status	FU1 fast - FU2 slow	0.259697	-0.661111	1.18051	0.986882	Non-significant	FU1-FU2	fast-slow
SYAP1	OID30636	Q96A49	Inflammation_II	Timepoint:progression_status	B fast - FU2 fast	-0.113497	-0.513316	0.286322	0.987191	Non-significant	B-FU2	fast-fast
BPIFB1	OID20308	Q8TDL5	Cardiometabolic	Timepoint:progression_status	FU1 fast - B slow	0.309396	-0.803921	1.42271	0.987423	Non-significant	FU1-B	fast-slow
METAP1D	OID20519	Q6UB28	Inflammation	Timepoint:progression_status	FU1 fast - FU1 slow	-0.455615	-2.07272	1.16149	0.987832	Non-significant	FU1-FU1	fast-slow
NGRN	OID31115	Q9NPE2	Neurology_II	Timepoint:progression_status	FU2 fast - FU3 fast	0.205025	-0.522273	0.932324	0.987933	Non-significant	FU2-FU3	fast-fast
CRH	OID21257	P06850	Oncology	Timepoint:progression_status	FU3 fast - FU1 slow	-0.848217	-3.85267	2.15624	0.988191	Non-significant	FU3-FU1	fast-slow
M6PR	OID30208	P20645	Cardiometabolic_II	Timepoint:progression_status	B slow - FU2 slow	0.0402577	-0.104129	0.184644	0.988367	Non-significant	B-FU2	slow-slow
VGF	OID31067	O15240	Neurology_II	Timepoint:progression_status	FU1 slow - FU2 slow	0.0876459	-0.229113	0.404405	0.988844	Non-significant	FU1-FU2	slow-slow
METAP1D	OID20519	Q6UB28	Inflammation	Timepoint:progression_status	FU3 fast - B slow	0.910073	-2.3524	4.17255	0.988989	Non-significant	FU3-B	fast-slow
GADD45GIP1	OID30237	Q8TAE8	Cardiometabolic_II	Timepoint:progression_status	FU1 slow - FU3 slow	-0.138391	-0.638409	0.361627	0.989061	Non-significant	FU1-FU3	slow-slow
AGER	OID20756	Q15109	Inflammation	Timepoint:progression_status	FU1 fast - FU2 fast	-0.157594	-0.731366	0.416177	0.989427	Non-significant	FU1-FU2	fast-fast
LEO1	OID30991	Q8WVC0	Neurology_II	Timepoint:progression_status	FU1 fast - FU1 slow	-0.33937	-1.58874	0.909997	0.989651	Non-significant	FU1-FU1	fast-slow
MME	OID21307	P08473	Oncology	Timepoint:progression_status	FU1 fast - FU3 fast	0.556872	-1.48691	2.60065	0.989978	Non-significant	FU1-FU3	fast-fast
EIF4G3	OID31022	O43432	Neurology_II	Timepoint:progression_status	B fast - FU2 slow	0.144399	-0.384836	0.673635	0.990379	Non-significant	B-FU2	fast-slow
IL6	OID21276	P05231	Oncology	Timepoint:progression_status	B fast - FU3 slow	0.479223	-1.29696	2.25541	0.990791	Non-significant	B-FU3	fast-slow
AGR2	OID20896	O95994	Neurology	Timepoint:progression_status	FU1 fast - B slow	-0.586874	-2.77566	1.60191	0.990824	Non-significant	FU1-B	fast-slow
UPB1	OID30352	Q9UBR1	Cardiometabolic_II	Timepoint:progression_status	FU2 fast - B slow	-0.422245	-1.98773	1.14324	0.990894	Non-significant	FU2-B	fast-slow
PGF	OID20673	P49763	Inflammation	Timepoint:progression_status	B fast - FU3 slow	0.195768	-0.536291	0.927828	0.991014	Non-significant	B-FU3	fast-slow
GADD45GIP1	OID30237	Q8TAE8	Cardiometabolic_II	Timepoint:progression_status	FU3 fast - B slow	0.277408	-0.752767	1.30758	0.991077	Non-significant	FU3-B	fast-slow
BGLAP	OID30389	P02818	Cardiometabolic_II	Timepoint:progression_status	B fast - B slow	-0.364532	-1.73971	1.01065	0.991202	Non-significant	B-B	fast-slow
AGER	OID20756	Q15109	Inflammation	Timepoint:progression_status	FU2 fast - B slow	0.198818	-0.549185	0.946821	0.991229	Non-significant	FU2-B	fast-slow
VGF	OID31067	O15240	Neurology_II	Timepoint:progression_status	FU2 fast - FU3 slow	0.154035	-0.419261	0.727331	0.991233	Non-significant	FU2-FU3	fast-slow
SPINT3	OID31509	P49223	Oncology_II	Timepoint:progression_status	FU1 fast - FU3 fast	-0.494445	-2.35544	1.36655	0.991333	Non-significant	FU1-FU3	fast-fast
LEP	OID20187	P41159	Cardiometabolic	Timepoint:progression_status	B fast - FU1 slow	-0.340718	-1.64517	0.963735	0.991545	Non-significant	B-FU1	fast-slow
GADD45GIP1	OID30237	Q8TAE8	Cardiometabolic_II	Timepoint:progression_status	B slow - FU2 slow	0.0896686	-0.252164	0.431502	0.991883	Non-significant	B-FU2	slow-slow
IL6	OID20911	P05231	Neurology	Timepoint:progression_status	FU2 fast - FU3 fast	0.689077	-1.92979	3.30794	0.991904	Non-significant	FU2-FU3	fast-fast
CPM	OID21054	P14384	Neurology	Timepoint:progression_status	FU2 slow - FU3 slow	0.156325	-0.438744	0.751395	0.991945	Non-significant	FU2-FU3	slow-slow
PNMA2	OID30842	Q9UL42	Neurology_II	Timepoint:progression_status	FU1 fast - FU2 fast	-0.144912	-0.692228	0.402404	0.991982	Non-significant	FU1-FU2	fast-fast
SPTBN2	OID30876	O15020	Neurology_II	Timepoint:progression_status	FU1 slow - FU2 slow	0.124636	-0.351277	0.600548	0.99205	Non-significant	FU1-FU2	slow-slow
UPB1	OID30352	Q9UBR1	Cardiometabolic_II	Timepoint:progression_status	FU2 fast - FU3 fast	0.786035	-2.2021	3.77417	0.992054	Non-significant	FU2-FU3	fast-fast
GADD45GIP1	OID30237	Q8TAE8	Cardiometabolic_II	Timepoint:progression_status	FU1 fast - FU3 slow	-0.165901	-0.794615	0.462813	0.992073	Non-significant	FU1-FU3	fast-slow
CRH	OID21257	P06850	Oncology	Timepoint:progression_status	FU1 fast - FU3 slow	0.497404	-1.39028	2.38508	0.992073	Non-significant	FU1-FU3	fast-slow
RAB33A	OID30122	Q14088	Cardiometabolic_II	Timepoint:progression_status	B fast - FU2 fast	0.103255	-0.28753	0.494039	0.992081	Non-significant	B-FU2	fast-fast
M6PR	OID30208	P20645	Cardiometabolic_II	Timepoint:progression_status	B fast - FU3 slow	0.0797957	-0.224464	0.384055	0.992179	Non-significant	B-FU3	fast-slow
CHCHD6	OID31426	Q9BRQ6	Oncology_II	Timepoint:progression_status	FU2 slow - FU3 slow	-0.173518	-0.84003	0.492995	0.992426	Non-significant	FU2-FU3	slow-slow
SYAP1	OID30636	Q96A49	Inflammation_II	Timepoint:progression_status	FU1 fast - B slow	-0.104519	-0.506948	0.297911	0.99253	Non-significant	FU1-B	fast-slow
AKR7L	OID30488	Q8NHP1	Inflammation_II	Timepoint:progression_status	B fast - FU3 slow	0.274911	-0.777299	1.32712	0.992583	Non-significant	B-FU3	fast-slow
LEP	OID20187	P41159	Cardiometabolic	Timepoint:progression_status	B fast - FU3 slow	-0.379618	-1.85168	1.09244	0.992778	Non-significant	B-FU3	fast-slow
KLK4	OID21391	Q9Y5K2	Oncology	Timepoint:progression_status	FU1 fast - FU2 fast	-0.218707	-1.07671	0.639292	0.993238	Non-significant	FU1-FU2	fast-fast
INSL3	OID31129	P51460	Neurology_II	Timepoint:progression_status	FU2 fast - FU3 fast	0.536738	-1.57799	2.65146	0.993408	Non-significant	FU2-FU3	fast-fast
SPINT3	OID31509	P49223	Oncology_II	Timepoint:progression_status	B fast - FU2 slow	-0.39826	-2.0041	1.20758	0.993478	Non-significant	B-FU2	fast-slow
NGRN	OID31115	Q9NPE2	Neurology_II	Timepoint:progression_status	FU3 fast - B slow	0.186965	-0.545292	0.919223	0.993532	Non-significant	FU3-B	fast-slow
NGRN	OID31115	Q9NPE2	Neurology_II	Timepoint:progression_status	B slow - FU2 slow	0.0621632	-0.184043	0.30837	0.993566	Non-significant	B-FU2	slow-slow
CPM	OID21054	P14384	Neurology	Timepoint:progression_status	FU2 fast - B slow	0.189352	-0.562518	0.941222	0.993712	Non-significant	FU2-B	fast-slow
SLC9A3R1	OID30630	O14745	Inflammation_II	Timepoint:progression_status	FU2 fast - FU3 fast	0.419838	-1.24176	2.08144	0.993783	Non-significant	FU2-FU3	fast-fast
VGF	OID31067	O15240	Neurology_II	Timepoint:progression_status	B slow - FU3 slow	0.115129	-0.341209	0.571467	0.993797	Non-significant	B-FU3	slow-slow
BGLAP	OID30389	P02818	Cardiometabolic_II	Timepoint:progression_status	FU1 fast - B slow	-0.343892	-1.71907	1.03129	0.993813	Non-significant	FU1-B	fast-slow
PDIA3	OID30573	P30101	Inflammation_II	Timepoint:progression_status	FU1 fast - FU3 fast	-0.313234	-1.56359	0.93712	0.994071	Non-significant	FU1-FU3	fast-fast
BGLAP	OID30389	P02818	Cardiometabolic_II	Timepoint:progression_status	FU2 fast - FU3 fast	0.595913	-1.79714	2.98897	0.994224	Non-significant	FU2-FU3	fast-fast
CHCHD6	OID31426	Q9BRQ6	Oncology_II	Timepoint:progression_status	FU3 fast - B slow	0.343602	-1.02993	1.71713	0.994294	Non-significant	FU3-B	fast-slow
M6PR	OID30208	P20645	Cardiometabolic_II	Timepoint:progression_status	FU1 fast - FU3 slow	0.0750091	-0.22925	0.379268	0.994633	Non-significant	FU1-FU3	fast-slow
BGLAP	OID30389	P02818	Cardiometabolic_II	Timepoint:progression_status	FU2 slow - FU3 slow	-0.289613	-1.46782	0.888594	0.99464	Non-significant	FU2-FU3	slow-slow
SLC9A3R1	OID30630	O14745	Inflammation_II	Timepoint:progression_status	B fast - FU2 fast	0.20302	-0.627248	1.03329	0.99478	Non-significant	B-FU2	fast-fast
FABP9	OID20501	Q0Z7S8	Inflammation	Timepoint:progression_status	FU1 slow - FU2 slow	-0.0679513	-0.346964	0.211062	0.994852	Non-significant	FU1-FU2	slow-slow
IL6	OID20911	P05231	Neurology	Timepoint:progression_status	B fast - FU3 fast	-0.631325	-3.21912	1.95646	0.994902	Non-significant	B-FU3	fast-fast
SYAP1	OID30636	Q96A49	Inflammation_II	Timepoint:progression_status	FU2 slow - FU3 slow	-0.0969518	-0.496374	0.302471	0.995064	Non-significant	FU2-FU3	slow-slow
CHCHD6	OID31426	Q9BRQ6	Oncology_II	Timepoint:progression_status	FU3 fast - FU3 slow	0.354332	-1.10239	1.81106	0.995191	Non-significant	FU3-FU3	fast-slow
VGF	OID31067	O15240	Neurology_II	Timepoint:progression_status	FU3 fast - FU3 slow	0.234845	-0.733965	1.20365	0.9953	Non-significant	FU3-FU3	fast-slow
GADD45GIP1	OID30237	Q8TAE8	Cardiometabolic_II	Timepoint:progression_status	FU3 fast - FU3 slow	0.26391	-0.828951	1.35677	0.995399	Non-significant	FU3-FU3	fast-slow
PGF	OID20673	P49763	Inflammation	Timepoint:progression_status	B slow - FU1 slow	-0.0744407	-0.388722	0.23984	0.995658	Non-significant	B-FU1	slow-slow
LEO1	OID30991	Q8WVC0	Neurology_II	Timepoint:progression_status	B fast - FU3 fast	0.487087	-1.59423	2.56841	0.996049	Non-significant	B-FU3	fast-fast
VGF	OID31067	O15240	Neurology_II	Timepoint:progression_status	FU1 fast - FU1 slow	-0.10016	-0.526403	0.326082	0.996056	Non-significant	FU1-FU1	fast-slow
INSL3	OID31129	P51460	Neurology_II	Timepoint:progression_status	B fast - FU2 fast	0.238939	-0.786963	1.26484	0.996101	Non-significant	B-FU2	fast-fast
ARAF	OID31260	P10398	Oncology_II	Timepoint:progression_status	FU1 fast - FU1 slow	0.211145	-0.707095	1.12939	0.996168	Non-significant	FU1-FU1	fast-slow
DHODH	OID30137	Q02127	Cardiometabolic_II	Timepoint:progression_status	FU3 fast - FU2 slow	0.252715	-0.825881	1.33131	0.996198	Non-significant	FU3-FU2	fast-slow
CPM	OID21054	P14384	Neurology	Timepoint:progression_status	B fast - FU1 slow	0.161616	-0.541707	0.86494	0.996294	Non-significant	B-FU1	fast-slow
IL6	OID21276	P05231	Oncology	Timepoint:progression_status	B slow - FU1 slow	0.198248	-0.662092	1.05859	0.996341	Non-significant	B-FU1	slow-slow
PNMA2	OID30842	Q9UL42	Neurology_II	Timepoint:progression_status	FU2 fast - FU3 slow	0.146689	-0.483307	0.776684	0.996358	Non-significant	FU2-FU3	fast-slow
METAP1D	OID20519	Q6UB28	Inflammation	Timepoint:progression_status	FU2 fast - FU3 fast	0.744783	-2.47832	3.96788	0.996389	Non-significant	FU2-FU3	fast-fast
CHCHD6	OID31426	Q9BRQ6	Oncology_II	Timepoint:progression_status	FU1 fast - FU1 slow	0.158759	-0.532463	0.84998	0.996462	Non-significant	FU1-FU1	fast-slow
PRND	OID31124	Q9UKY0	Neurology_II	Timepoint:progression_status	FU2 fast - FU3 slow	-0.27189	-1.46443	0.920649	0.996709	Non-significant	FU2-FU3	fast-slow
FABP9	OID20501	Q0Z7S8	Inflammation	Timepoint:progression_status	FU1 fast - FU2 fast	-0.0938593	-0.508667	0.320949	0.996747	Non-significant	FU1-FU2	fast-fast
PNMA2	OID30842	Q9UL42	Neurology_II	Timepoint:progression_status	B fast - FU1 slow	-0.104269	-0.561305	0.352767	0.996794	Non-significant	B-FU1	fast-slow
RAB33A	OID30122	Q14088	Cardiometabolic_II	Timepoint:progression_status	B fast - B slow	-0.0743551	-0.40068	0.25197	0.996819	Non-significant	B-B	fast-slow
EIF4G3	OID31022	O43432	Neurology_II	Timepoint:progression_status	B slow - FU2 slow	-0.0976228	-0.53182	0.336574	0.996876	Non-significant	B-FU2	slow-slow
METAP1D	OID20519	Q6UB28	Inflammation	Timepoint:progression_status	FU3 fast - FU1 slow	0.739243	-2.52323	4.00172	0.996912	Non-significant	FU3-FU1	fast-slow
EIF4G3	OID31022	O43432	Neurology_II	Timepoint:progression_status	B slow - FU3 slow	-0.137268	-0.745267	0.470732	0.996939	Non-significant	B-FU3	slow-slow
CBX2	OID30177	Q14781	Cardiometabolic_II	Timepoint:progression_status	B fast - FU1 fast	0.107133	-0.373858	0.588125	0.997063	Non-significant	B-FU1	fast-fast
CHCHD6	OID31426	Q9BRQ6	Oncology_II	Timepoint:progression_status	FU1 slow - FU2 slow	0.100899	-0.352673	0.554472	0.99707	Non-significant	FU1-FU2	slow-slow
SPTBN2	OID30876	O15020	Neurology_II	Timepoint:progression_status	FU2 slow - FU3 slow	0.149504	-0.518991	0.817999	0.99712	Non-significant	FU2-FU3	slow-slow
VGF	OID31067	O15240	Neurology_II	Timepoint:progression_status	FU1 fast - FU3 slow	0.120313	-0.417176	0.657802	0.997149	Non-significant	FU1-FU3	fast-slow
SPTBN2	OID30876	O15020	Neurology_II	Timepoint:progression_status	FU3 fast - FU2 slow	-0.286813	-1.56847	0.994842	0.99716	Non-significant	FU3-FU2	fast-slow
RARRES1	OID21177	P49788	Oncology	Timepoint:progression_status	FU1 slow - FU2 slow	-0.0678029	-0.374574	0.238968	0.997191	Non-significant	FU1-FU2	slow-slow
RAB33A	OID30122	Q14088	Cardiometabolic_II	Timepoint:progression_status	FU1 slow - FU2 slow	-0.060372	-0.330718	0.209974	0.997198	Non-significant	FU1-FU2	slow-slow
METAP1D	OID20519	Q6UB28	Inflammation	Timepoint:progression_status	B fast - FU3 fast	0.696962	-2.48131	3.87524	0.997409	Non-significant	B-FU3	fast-fast
DHODH	OID30137	Q02127	Cardiometabolic_II	Timepoint:progression_status	FU3 fast - FU1 slow	0.236991	-0.840341	1.31432	0.997441	Non-significant	FU3-FU1	fast-slow
MME	OID21307	P08473	Oncology	Timepoint:progression_status	FU1 fast - FU2 fast	0.218211	-0.790163	1.22659	0.997545	Non-significant	FU1-FU2	fast-fast
KLK4	OID21391	Q9Y5K2	Oncology	Timepoint:progression_status	B slow - FU1 slow	-0.122456	-0.693513	0.448602	0.997676	Non-significant	B-FU1	slow-slow
M6PR	OID30208	P20645	Cardiometabolic_II	Timepoint:progression_status	FU2 slow - FU3 slow	-0.0455689	-0.260119	0.168982	0.997839	Non-significant	FU2-FU3	slow-slow
IL6	OID21276	P05231	Oncology	Timepoint:progression_status	FU2 fast - FU3 fast	0.557303	-2.06637	3.18097	0.997852	Non-significant	FU2-FU3	fast-fast
INSL3	OID31129	P51460	Neurology_II	Timepoint:progression_status	B fast - FU3 slow	-0.418159	-2.41248	1.57617	0.997864	Non-significant	B-FU3	fast-slow
PDIA3	OID30573	P30101	Inflammation_II	Timepoint:progression_status	FU1 fast - FU2 slow	0.133532	-0.504027	0.77109	0.998039	Non-significant	FU1-FU2	fast-slow
GNE	OID21231	Q9Y223	Oncology	Timepoint:progression_status	FU1 fast - FU1 slow	0.135601	-0.518098	0.789299	0.998239	Non-significant	FU1-FU1	fast-slow
GADD45GIP1	OID30237	Q8TAE8	Cardiometabolic_II	Timepoint:progression_status	FU2 slow - FU3 slow	-0.103167	-0.604851	0.398517	0.998252	Non-significant	FU2-FU3	slow-slow
DHODH	OID30137	Q02127	Cardiometabolic_II	Timepoint:progression_status	FU1 fast - FU3 fast	-0.221544	-1.29732	0.854237	0.998283	Non-significant	FU1-FU3	fast-fast
KRT19	OID20596	P08727	Inflammation	Timepoint:progression_status	FU3 fast - B slow	0.726915	-2.79926	4.25309	0.998311	Non-significant	FU3-B	fast-slow
SLC9A3R1	OID30630	O14745	Inflammation_II	Timepoint:progression_status	FU1 fast - FU3 fast	-0.335122	-1.97093	1.30068	0.998333	Non-significant	FU1-FU3	fast-fast
ARAF	OID31260	P10398	Oncology_II	Timepoint:progression_status	FU1 fast - FU3 slow	0.210994	-0.83313	1.25512	0.998439	Non-significant	FU1-FU3	fast-slow
IL17D	OID20481	Q8TAD2	Inflammation	Timepoint:progression_status	FU1 slow - FU3 slow	0.121536	-0.481724	0.724797	0.99846	Non-significant	FU1-FU3	slow-slow
PGF	OID20673	P49763	Inflammation	Timepoint:progression_status	FU1 slow - FU3 slow	-0.095371	-0.569232	0.37849	0.998462	Non-significant	FU1-FU3	slow-slow
AGR2	OID20896	O95994	Neurology	Timepoint:progression_status	FU3 fast - FU3 slow	0.921201	-3.62295	5.46535	0.998475	Non-significant	FU3-FU3	fast-slow
CHCHD6	OID31426	Q9BRQ6	Oncology_II	Timepoint:progression_status	FU1 fast - FU3 fast	-0.268192	-1.59899	1.06261	0.998484	Non-significant	FU1-FU3	fast-fast
AGER	OID20756	Q15109	Inflammation	Timepoint:progression_status	FU2 fast - FU3 slow	-0.171878	-1.02842	0.684662	0.998548	Non-significant	FU2-FU3	fast-slow
AKR7L	OID30488	Q8NHP1	Inflammation_II	Timepoint:progression_status	FU1 fast - B slow	-0.168102	-1.00615	0.669947	0.99855	Non-significant	FU1-B	fast-slow
SPINT3	OID31509	P49223	Oncology_II	Timepoint:progression_status	FU2 fast - FU3 fast	0.37431	-1.50498	2.2536	0.998558	Non-significant	FU2-FU3	fast-fast
INSL3	OID31129	P51460	Neurology_II	Timepoint:progression_status	FU2 slow - FU3 slow	0.205654	-0.830563	1.24187	0.998585	Non-significant	FU2-FU3	slow-slow
LEO1	OID30991	Q8WVC0	Neurology_II	Timepoint:progression_status	FU3 fast - FU1 slow	0.447063	-1.78884	2.68297	0.998611	Non-significant	FU3-FU1	fast-slow
ARAF	OID31260	P10398	Oncology_II	Timepoint:progression_status	FU1 fast - B slow	0.17883	-0.73941	1.09707	0.99866	Non-significant	FU1-B	fast-slow
SLC9A3R1	OID30630	O14745	Inflammation_II	Timepoint:progression_status	FU2 slow - FU3 slow	-0.162341	-0.987395	0.662713	0.998695	Non-significant	FU2-FU3	slow-slow
BGLAP	OID30389	P02818	Cardiometabolic_II	Timepoint:progression_status	B slow - FU1 slow	-0.153467	-0.93831	0.631376	0.998713	Non-significant	B-FU1	slow-slow
PNMA2	OID30842	Q9UL42	Neurology_II	Timepoint:progression_status	FU2 fast - FU2 slow	0.100294	-0.411287	0.611876	0.998779	Non-significant	FU2-FU2	fast-slow
MME	OID21307	P08473	Oncology	Timepoint:progression_status	FU1 fast - B slow	-0.253316	-1.57527	1.06864	0.998785	Non-significant	FU1-B	fast-slow
CHAD	OID30660	O15335	Inflammation_II	Timepoint:progression_status	B fast - FU2 fast	0.143216	-0.601299	0.887731	0.998843	Non-significant	B-FU2	fast-fast
PGF	OID20673	P49763	Inflammation	Timepoint:progression_status	B fast - FU1 fast	0.0809267	-0.340725	0.502579	0.998854	Non-significant	B-FU1	fast-fast
METAP1D	OID20519	Q6UB28	Inflammation	Timepoint:progression_status	FU1 slow - FU2 slow	0.208573	-0.878719	1.29586	0.998858	Non-significant	FU1-FU2	slow-slow
LEP	OID20187	P41159	Cardiometabolic	Timepoint:progression_status	B slow - FU1 slow	-0.120604	-0.749759	0.508552	0.998865	Non-significant	B-FU1	slow-slow
SPTBN2	OID30876	O15020	Neurology_II	Timepoint:progression_status	FU2 fast - FU2 slow	-0.124014	-0.766556	0.518528	0.998896	Non-significant	FU2-FU2	fast-slow
KRT19	OID20596	P08727	Inflammation	Timepoint:progression_status	FU1 fast - FU1 slow	0.375431	-1.62247	2.37334	0.998952	Non-significant	FU1-FU1	fast-slow
AKR7L	OID30488	Q8NHP1	Inflammation_II	Timepoint:progression_status	FU1 fast - FU3 fast	-0.335596	-2.09505	1.42386	0.998953	Non-significant	FU1-FU3	fast-fast
CBX2	OID30177	Q14781	Cardiometabolic_II	Timepoint:progression_status	B fast - FU1 slow	-0.0908415	-0.567398	0.385715	0.998967	Non-significant	B-FU1	fast-slow
AKR7L	OID30488	Q8NHP1	Inflammation_II	Timepoint:progression_status	FU2 slow - FU3 slow	-0.166751	-1.05417	0.720669	0.999037	Non-significant	FU2-FU3	slow-slow
CHCHD6	OID31426	Q9BRQ6	Oncology_II	Timepoint:progression_status	B slow - FU1 slow	0.0833481	-0.364908	0.531605	0.999067	Non-significant	B-FU1	slow-slow
METAP1D	OID20519	Q6UB28	Inflammation	Timepoint:progression_status	FU1 slow - FU3 slow	-0.294987	-1.88356	1.29358	0.999098	Non-significant	FU1-FU3	slow-slow
ARAF	OID31260	P10398	Oncology_II	Timepoint:progression_status	B fast - FU2 slow	0.167804	-0.753004	1.08861	0.99913	Non-significant	B-FU2	fast-slow
SYAP1	OID30636	Q96A49	Inflammation_II	Timepoint:progression_status	FU1 fast - FU1 slow	-0.0742223	-0.476652	0.328207	0.999135	Non-significant	FU1-FU1	fast-slow
SPINT3	OID31509	P49223	Oncology_II	Timepoint:progression_status	FU1 slow - FU2 slow	0.112211	-0.501679	0.726101	0.999166	Non-significant	FU1-FU2	slow-slow
PDIA3	OID30573	P30101	Inflammation_II	Timepoint:progression_status	FU1 slow - FU2 slow	0.0777433	-0.35022	0.505706	0.999198	Non-significant	FU1-FU2	slow-slow
CPM	OID21054	P14384	Neurology	Timepoint:progression_status	FU1 fast - B slow	0.126982	-0.576341	0.830306	0.999204	Non-significant	FU1-B	fast-slow
MME	OID21307	P08473	Oncology	Timepoint:progression_status	B fast - FU3 slow	0.270377	-1.23897	1.77972	0.999284	Non-significant	B-FU3	fast-slow
M6PR	OID30208	P20645	Cardiometabolic_II	Timepoint:progression_status	FU3 fast - FU2 slow	0.083901	-0.381669	0.549471	0.999292	Non-significant	FU3-FU2	fast-slow
M6PR	OID30208	P20645	Cardiometabolic_II	Timepoint:progression_status	FU1 slow - FU2 slow	0.0254095	-0.118977	0.169796	0.999349	Non-significant	FU1-FU2	slow-slow
NGRN	OID31115	Q9NPE2	Neurology_II	Timepoint:progression_status	FU1 slow - FU3 slow	-0.0632661	-0.422051	0.295519	0.999357	Non-significant	FU1-FU3	slow-slow
METAP1D	OID20519	Q6UB28	Inflammation	Timepoint:progression_status	FU1 fast - B slow	-0.284785	-1.90189	1.33232	0.999359	Non-significant	FU1-B	fast-slow
PGF	OID20673	P49763	Inflammation	Timepoint:progression_status	FU1 fast - FU2 slow	0.112633	-0.537094	0.76236	0.999362	Non-significant	FU1-FU2	fast-slow
NGRN	OID31115	Q9NPE2	Neurology_II	Timepoint:progression_status	FU1 slow - FU2 slow	-0.0431516	-0.289358	0.203055	0.999364	Non-significant	FU1-FU2	slow-slow
NGRN	OID31115	Q9NPE2	Neurology_II	Timepoint:progression_status	FU1 fast - FU3 slow	-0.0780966	-0.519838	0.363645	0.999373	Non-significant	FU1-FU3	fast-slow
EIF4G3	OID31022	O43432	Neurology_II	Timepoint:progression_status	FU1 slow - FU3 slow	-0.107009	-0.715008	0.500991	0.999382	Non-significant	FU1-FU3	slow-slow
ARAF	OID31260	P10398	Oncology_II	Timepoint:progression_status	B slow - FU2 slow	0.0808671	-0.382891	0.544625	0.999389	Non-significant	B-FU2	slow-slow
LEP	OID20187	P41159	Cardiometabolic	Timepoint:progression_status	B fast - B slow	-0.220114	-1.52457	1.08434	0.999464	Non-significant	B-B	fast-slow
IL6	OID20911	P05231	Neurology	Timepoint:progression_status	B slow - FU1 slow	0.145659	-0.712468	1.00379	0.999485	Non-significant	B-FU1	slow-slow
IL17D	OID20481	Q8TAD2	Inflammation	Timepoint:progression_status	B fast - FU1 slow	-0.131107	-0.910427	0.648213	0.999488	Non-significant	B-FU1	fast-slow
RAB33A	OID30122	Q14088	Cardiometabolic_II	Timepoint:progression_status	B fast - FU1 fast	-0.06116	-0.420429	0.298109	0.999514	Non-significant	B-FU1	fast-fast
INSL3	OID31129	P51460	Neurology_II	Timepoint:progression_status	FU1 fast - FU3 fast	-0.351923	-2.44623	1.74238	0.999523	Non-significant	FU1-FU3	fast-fast
LEP	OID20187	P41159	Cardiometabolic	Timepoint:progression_status	B slow - FU3 slow	-0.159504	-1.10832	0.789317	0.999523	Non-significant	B-FU3	slow-slow
AGR2	OID20896	O95994	Neurology	Timepoint:progression_status	B fast - FU2 fast	-0.346002	-2.40958	1.71757	0.999532	Non-significant	B-FU2	fast-fast
RARRES1	OID21177	P49788	Oncology	Timepoint:progression_status	FU1 fast - FU3 slow	0.106914	-0.534802	0.74863	0.999564	Non-significant	FU1-FU3	fast-slow
AGER	OID20756	Q15109	Inflammation	Timepoint:progression_status	FU3 fast - FU3 slow	-0.220344	-1.53968	1.09899	0.99957	Non-significant	FU3-FU3	fast-slow
CPM	OID21054	P14384	Neurology	Timepoint:progression_status	FU1 fast - FU1 slow	-0.115177	-0.818501	0.588146	0.99958	Non-significant	FU1-FU1	fast-slow
MME	OID21307	P08473	Oncology	Timepoint:progression_status	FU2 fast - FU3 fast	0.33866	-1.72805	2.40537	0.999598	Non-significant	FU2-FU3	fast-fast
CBX2	OID30177	Q14781	Cardiometabolic_II	Timepoint:progression_status	B fast - B slow	-0.0776415	-0.554198	0.398915	0.999631	Non-significant	B-B	fast-slow
DHODH	OID30137	Q02127	Cardiometabolic_II	Timepoint:progression_status	B fast - FU3 fast	0.174576	-0.901204	1.25036	0.999636	Non-significant	B-FU3	fast-fast
INSL3	OID31129	P51460	Neurology_II	Timepoint:progression_status	B slow - FU1 slow	-0.109659	-0.790777	0.571459	0.999637	Non-significant	B-FU1	slow-slow
MME	OID21307	P08473	Oncology	Timepoint:progression_status	B fast - FU2 slow	0.210781	-1.11499	1.53655	0.999642	Non-significant	B-FU2	fast-slow
NGRN	OID31115	Q9NPE2	Neurology_II	Timepoint:progression_status	FU1 fast - FU2 slow	-0.0579821	-0.41766	0.301696	0.999645	Non-significant	FU1-FU2	fast-slow
METAP1D	OID20519	Q6UB28	Inflammation	Timepoint:progression_status	B slow - FU1 slow	-0.17083	-1.24556	0.9039	0.999666	Non-significant	B-FU1	slow-slow
GNE	OID21231	Q9Y223	Oncology	Timepoint:progression_status	FU1 fast - FU3 fast	0.235964	-1.23864	1.71057	0.999674	Non-significant	FU1-FU3	fast-fast
SYAP1	OID30636	Q96A49	Inflammation_II	Timepoint:progression_status	FU1 fast - FU3 slow	-0.0791358	-0.573664	0.415393	0.999675	Non-significant	FU1-FU3	fast-slow
AGER	OID20756	Q15109	Inflammation	Timepoint:progression_status	B fast - FU3 fast	-0.183109	-1.3428	0.97658	0.999688	Non-significant	B-FU3	fast-fast
PNMA2	OID30842	Q9UL42	Neurology_II	Timepoint:progression_status	FU2 fast - B slow	0.0809849	-0.428185	0.590155	0.99969	Non-significant	FU2-B	fast-slow
BPIFB1	OID20308	Q8TDL5	Cardiometabolic	Timepoint:progression_status	FU2 fast - FU2 slow	-0.180272	-1.34013	0.979581	0.999692	Non-significant	FU2-FU2	fast-slow
NGRN	OID31115	Q9NPE2	Neurology_II	Timepoint:progression_status	B fast - FU2 fast	0.0566571	-0.304061	0.417375	0.999696	Non-significant	B-FU2	fast-fast
PGF	OID20673	P49763	Inflammation	Timepoint:progression_status	FU1 fast - FU3 slow	0.114842	-0.617218	0.846901	0.999699	Non-significant	FU1-FU3	fast-slow
EIF4G3	OID31022	O43432	Neurology_II	Timepoint:progression_status	FU1 slow - FU2 slow	-0.0673636	-0.50156	0.366833	0.999717	Non-significant	FU1-FU2	slow-slow
SYAP1	OID30636	Q96A49	Inflammation_II	Timepoint:progression_status	FU3 fast - FU2 slow	0.127372	-0.689372	0.944117	0.999726	Non-significant	FU3-FU2	fast-slow
SLC9A3R1	OID30630	O14745	Inflammation_II	Timepoint:progression_status	FU3 fast - FU3 slow	-0.271938	-2.02656	1.48269	0.999737	Non-significant	FU3-FU3	fast-slow
PNMA2	OID30842	Q9UL42	Neurology_II	Timepoint:progression_status	FU1 fast - FU1 slow	0.0707508	-0.386285	0.527787	0.999741	Non-significant	FU1-FU1	fast-slow
IL17D	OID20481	Q8TAD2	Inflammation	Timepoint:progression_status	FU1 fast - B slow	0.118123	-0.661197	0.897443	0.999743	Non-significant	FU1-B	fast-slow
EIF4G3	OID31022	O43432	Neurology_II	Timepoint:progression_status	B fast - FU3 slow	0.104754	-0.572757	0.782266	0.999743	Non-significant	B-FU3	fast-slow
METAP1D	OID20519	Q6UB28	Inflammation	Timepoint:progression_status	FU1 fast - FU2 slow	-0.247042	-1.87168	1.3776	0.999757	Non-significant	FU1-FU2	fast-slow
UPB1	OID30352	Q9UBR1	Cardiometabolic_II	Timepoint:progression_status	FU1 fast - B slow	-0.216286	-1.64061	1.20804	0.999764	Non-significant	FU1-B	fast-slow
AGER	OID20756	Q15109	Inflammation	Timepoint:progression_status	FU2 fast - FU1 slow	-0.112182	-0.860185	0.635821	0.999773	Non-significant	FU2-FU1	fast-slow
ARAF	OID31260	P10398	Oncology_II	Timepoint:progression_status	B fast - FU1 fast	-0.0918933	-0.706087	0.5223	0.999778	Non-significant	B-FU1	fast-fast
CRH	OID21257	P06850	Oncology	Timepoint:progression_status	FU2 fast - FU3 fast	-0.435298	-3.3361	2.46551	0.999778	Non-significant	FU2-FU3	fast-fast
PRND	OID31124	Q9UKY0	Neurology_II	Timepoint:progression_status	FU3 fast - B slow	-0.256036	-1.96527	1.45319	0.999792	Non-significant	FU3-B	fast-slow
KRT19	OID20596	P08727	Inflammation	Timepoint:progression_status	FU2 fast - FU3 fast	0.482857	-2.81746	3.78317	0.999812	Non-significant	FU2-FU3	fast-fast
CBX2	OID30177	Q14781	Cardiometabolic_II	Timepoint:progression_status	B fast - FU2 slow	-0.0703376	-0.549539	0.408864	0.999816	Non-significant	B-FU2	fast-slow
MME	OID21307	P08473	Oncology	Timepoint:progression_status	FU1 fast - FU1 slow	-0.190116	-1.51207	1.13184	0.999816	Non-significant	FU1-FU1	fast-slow
RAB33A	OID30122	Q14088	Cardiometabolic_II	Timepoint:progression_status	B fast - FU1 slow	-0.0479403	-0.374265	0.278385	0.999817	Non-significant	B-FU1	fast-slow
AGER	OID20756	Q15109	Inflammation	Timepoint:progression_status	B fast - FU1 fast	-0.07398	-0.588702	0.440742	0.999829	Non-significant	B-FU1	fast-fast
GNE	OID21231	Q9Y223	Oncology	Timepoint:progression_status	FU3 fast - FU3 slow	0.223251	-1.32362	1.77012	0.999838	Non-significant	FU3-FU3	fast-slow
SLC9A3R1	OID30630	O14745	Inflammation_II	Timepoint:progression_status	FU1 slow - FU3 slow	-0.117416	-0.939391	0.704559	0.999842	Non-significant	FU1-FU3	slow-slow
SPTBN2	OID30876	O15020	Neurology_II	Timepoint:progression_status	FU1 fast - FU2 fast	-0.0979685	-0.785232	0.589295	0.999843	Non-significant	FU1-FU2	fast-fast
RAB33A	OID30122	Q14088	Cardiometabolic_II	Timepoint:progression_status	FU1 fast - FU2 slow	-0.0471524	-0.375422	0.281117	0.999843	Non-significant	FU1-FU2	fast-slow
KRT19	OID20596	P08727	Inflammation	Timepoint:progression_status	FU3 fast - FU3 slow	0.528442	-3.1941	4.25099	0.999854	Non-significant	FU3-FU3	fast-slow
SLC9A3R1	OID30630	O14745	Inflammation_II	Timepoint:progression_status	FU2 fast - FU3 slow	0.1479	-0.895534	1.19133	0.999856	Non-significant	FU2-FU3	fast-slow
VGF	OID31067	O15240	Neurology_II	Timepoint:progression_status	FU2 fast - FU1 slow	-0.0664379	-0.536984	0.404108	0.999858	Non-significant	FU2-FU1	fast-slow
PNMA2	OID30842	Q9UL42	Neurology_II	Timepoint:progression_status	FU1 fast - B slow	-0.063927	-0.520963	0.393109	0.999869	Non-significant	FU1-B	fast-slow
UPB1	OID30352	Q9UBR1	Cardiometabolic_II	Timepoint:progression_status	FU1 fast - FU2 fast	0.205959	-1.28299	1.6949	0.99987	Non-significant	FU1-FU2	fast-fast
IL6	OID21276	P05231	Oncology	Timepoint:progression_status	FU1 slow - FU2 slow	-0.11963	-0.990769	0.751509	0.999875	Non-significant	FU1-FU2	slow-slow
SYAP1	OID30636	Q96A49	Inflammation_II	Timepoint:progression_status	FU1 fast - FU3 fast	-0.109556	-0.905636	0.686523	0.999877	Non-significant	FU1-FU3	fast-fast
AKR7L	OID30488	Q8NHP1	Inflammation_II	Timepoint:progression_status	FU3 fast - FU3 slow	-0.260539	-2.14756	1.62649	0.999879	Non-significant	FU3-FU3	fast-slow
AKR7L	OID30488	Q8NHP1	Inflammation_II	Timepoint:progression_status	FU2 fast - FU3 fast	-0.244339	-2.03154	1.54286	0.999884	Non-significant	FU2-FU3	fast-fast
CHAD	OID30660	O15335	Inflammation_II	Timepoint:progression_status	FU1 fast - FU1 slow	-0.142266	-1.21913	0.934602	0.999893	Non-significant	FU1-FU1	fast-slow
EIF4G3	OID31022	O43432	Neurology_II	Timepoint:progression_status	FU1 fast - FU3 slow	-0.0905391	-0.768051	0.586973	0.999903	Non-significant	FU1-FU3	fast-slow
IL17D	OID20481	Q8TAD2	Inflammation	Timepoint:progression_status	FU2 fast - FU2 slow	0.108426	-0.718926	0.935779	0.999907	Non-significant	FU2-FU2	fast-slow
ARAF	OID31260	P10398	Oncology_II	Timepoint:progression_status	B fast - FU1 slow	0.119252	-0.798989	1.03749	0.999908	Non-significant	B-FU1	fast-slow
PRND	OID31124	Q9UKY0	Neurology_II	Timepoint:progression_status	B fast - FU1 slow	0.12846	-0.864893	1.12181	0.999911	Non-significant	B-FU1	fast-slow
CPM	OID21054	P14384	Neurology	Timepoint:progression_status	B fast - FU3 slow	-0.107922	-0.931526	0.715681	0.999913	Non-significant	B-FU3	fast-slow
VGF	OID31067	O15240	Neurology_II	Timepoint:progression_status	FU3 fast - B slow	0.119716	-0.791721	1.03115	0.999914	Non-significant	FU3-B	fast-slow
GNE	OID21231	Q9Y223	Oncology	Timepoint:progression_status	FU1 slow - FU2 slow	-0.0690335	-0.605122	0.467055	0.999918	Non-significant	FU1-FU2	slow-slow
PNMA2	OID30842	Q9UL42	Neurology_II	Timepoint:progression_status	FU1 slow - FU3 slow	-0.068974	-0.599513	0.461565	0.99992	Non-significant	FU1-FU3	slow-slow
SPTBN2	OID30876	O15020	Neurology_II	Timepoint:progression_status	FU2 fast - B slow	0.0830096	-0.556508	0.722528	0.999921	Non-significant	FU2-B	fast-slow
AGER	OID20756	Q15109	Inflammation	Timepoint:progression_status	FU3 fast - FU1 slow	-0.160648	-1.40995	1.08866	0.999925	Non-significant	FU3-FU1	fast-slow
METAP1D	OID20519	Q6UB28	Inflammation	Timepoint:progression_status	FU3 fast - FU3 slow	0.444256	-3.01759	3.9061	0.999926	Non-significant	FU3-FU3	fast-slow
VGF	OID31067	O15240	Neurology_II	Timepoint:progression_status	FU1 fast - FU3 fast	-0.114532	-1.0211	0.792033	0.999932	Non-significant	FU1-FU3	fast-fast
GADD45GIP1	OID30237	Q8TAE8	Cardiometabolic_II	Timepoint:progression_status	B fast - FU3 fast	0.125749	-0.875245	1.12674	0.999933	Non-significant	B-FU3	fast-fast
M6PR	OID30208	P20645	Cardiometabolic_II	Timepoint:progression_status	FU3 fast - FU1 slow	0.0584915	-0.406569	0.523552	0.999936	Non-significant	FU3-FU1	fast-slow
RAB33A	OID30122	Q14088	Cardiometabolic_II	Timepoint:progression_status	B slow - FU2 slow	-0.0339572	-0.304304	0.236389	0.999936	Non-significant	B-FU2	slow-slow
ARAF	OID31260	P10398	Oncology_II	Timepoint:progression_status	FU2 fast - B slow	-0.119346	-1.08849	0.849793	0.999938	Non-significant	FU2-B	fast-slow
IL17D	OID20481	Q8TAD2	Inflammation	Timepoint:progression_status	B slow - FU3 slow	-0.0744599	-0.67772	0.528801	0.99994	Non-significant	B-FU3	slow-slow
PNMA2	OID30842	Q9UL42	Neurology_II	Timepoint:progression_status	B slow - FU3 slow	0.0657038	-0.464835	0.596243	0.999942	Non-significant	B-FU3	slow-slow
KRT19	OID20596	P08727	Inflammation	Timepoint:progression_status	B slow - FU3 slow	-0.198472	-1.81718	1.42024	0.999942	Non-significant	B-FU3	slow-slow
SPINT3	OID31509	P49223	Oncology_II	Timepoint:progression_status	B slow - FU2 slow	0.0750704	-0.53882	0.688961	0.999943	Non-significant	B-FU2	slow-slow
SPTBN2	OID30876	O15020	Neurology_II	Timepoint:progression_status	FU2 fast - FU3 fast	0.162799	-1.1656	1.4912	0.999946	Non-significant	FU2-FU3	fast-fast
GADD45GIP1	OID30237	Q8TAE8	Cardiometabolic_II	Timepoint:progression_status	FU1 fast - FU2 slow	-0.0627345	-0.579797	0.454328	0.999946	Non-significant	FU1-FU2	fast-slow
AKR7L	OID30488	Q8NHP1	Inflammation_II	Timepoint:progression_status	FU1 slow - FU2 slow	0.0733612	-0.538137	0.68486	0.99995	Non-significant	FU1-FU2	slow-slow
AGER	OID20756	Q15109	Inflammation	Timepoint:progression_status	FU3 fast - B slow	0.150352	-1.09895	1.39966	0.999952	Non-significant	FU3-B	fast-slow
PDIA3	OID30573	P30101	Inflammation_II	Timepoint:progression_status	FU1 fast - FU3 slow	0.0931216	-0.68561	0.871854	0.999954	Non-significant	FU1-FU3	fast-slow
EIF4G3	OID31022	O43432	Neurology_II	Timepoint:progression_status	FU2 fast - FU3 slow	-0.0861425	-0.810684	0.638399	0.999956	Non-significant	FU2-FU3	fast-slow
BPIFB1	OID20308	Q8TDL5	Cardiometabolic	Timepoint:progression_status	FU1 fast - FU1 slow	0.127889	-0.985428	1.24121	0.999958	Non-significant	FU1-FU1	fast-slow
NGRN	OID31115	Q9NPE2	Neurology_II	Timepoint:progression_status	B slow - FU3 slow	0.0420487	-0.316736	0.400834	0.999958	Non-significant	B-FU3	slow-slow
CRH	OID21257	P06850	Oncology	Timepoint:progression_status	FU3 fast - B slow	-0.354106	-3.35856	2.65035	0.999959	Non-significant	FU3-B	fast-slow
PRND	OID31124	Q9UKY0	Neurology_II	Timepoint:progression_status	B fast - FU1 fast	0.0801667	-0.611032	0.771366	0.99996	Non-significant	B-FU1	fast-fast
RARRES1	OID21177	P49788	Oncology	Timepoint:progression_status	FU2 fast - FU3 fast	0.107437	-0.818721	1.0336	0.999961	Non-significant	FU2-FU3	fast-fast
GNE	OID21231	Q9Y223	Oncology	Timepoint:progression_status	FU3 fast - FU2 slow	-0.169397	-1.62505	1.28625	0.999962	Non-significant	FU3-FU2	fast-slow
ARAF	OID31260	P10398	Oncology_II	Timepoint:progression_status	B fast - FU3 slow	0.1191	-0.925023	1.16322	0.999965	Non-significant	B-FU3	fast-slow
GNE	OID21231	Q9Y223	Oncology	Timepoint:progression_status	B slow - FU3 slow	0.0855852	-0.666573	0.837743	0.999967	Non-significant	B-FU3	slow-slow
SYAP1	OID30636	Q96A49	Inflammation_II	Timepoint:progression_status	B slow - FU1 slow	0.0302963	-0.239252	0.299845	0.999968	Non-significant	B-FU1	slow-slow
FABP9	OID20501	Q0Z7S8	Inflammation	Timepoint:progression_status	B slow - FU3 slow	0.0465486	-0.371573	0.46467	0.99997	Non-significant	B-FU3	slow-slow
VGF	OID31067	O15240	Neurology_II	Timepoint:progression_status	FU3 fast - FU2 slow	0.102018	-0.810489	1.01452	0.999971	Non-significant	FU3-FU2	fast-slow
CHCHD6	OID31426	Q9BRQ6	Oncology_II	Timepoint:progression_status	FU1 slow - FU3 slow	-0.0726183	-0.736949	0.591712	0.999974	Non-significant	FU1-FU3	slow-slow
CHCHD6	OID31426	Q9BRQ6	Oncology_II	Timepoint:progression_status	FU1 fast - B slow	0.0754104	-0.615811	0.766631	0.999974	Non-significant	FU1-B	fast-slow
IL6	OID20911	P05231	Neurology	Timepoint:progression_status	B slow - FU2 slow	0.0939949	-0.77494	0.962929	0.999975	Non-significant	B-FU2	slow-slow
RARRES1	OID21177	P49788	Oncology	Timepoint:progression_status	B fast - FU3 slow	0.0697874	-0.571929	0.711503	0.999975	Non-significant	B-FU3	fast-slow
DHODH	OID30137	Q02127	Cardiometabolic_II	Timepoint:progression_status	FU2 fast - B slow	-0.0594692	-0.611552	0.492613	0.999977	Non-significant	FU2-B	fast-slow
GNE	OID21231	Q9Y223	Oncology	Timepoint:progression_status	FU2 fast - FU3 fast	0.161539	-1.34262	1.6657	0.999978	Non-significant	FU2-FU3	fast-fast
CPM	OID21054	P14384	Neurology	Timepoint:progression_status	FU1 fast - FU2 fast	-0.0623699	-0.654277	0.529537	0.999979	Non-significant	FU1-FU2	fast-fast
KRT19	OID20596	P08727	Inflammation	Timepoint:progression_status	B fast - FU3 fast	0.343662	-2.91865	3.60597	0.99998	Non-significant	B-FU3	fast-fast
AKR7L	OID30488	Q8NHP1	Inflammation_II	Timepoint:progression_status	FU1 slow - FU3 slow	-0.0933894	-0.977498	0.790719	0.99998	Non-significant	FU1-FU3	slow-slow
ARAF	OID31260	P10398	Oncology_II	Timepoint:progression_status	FU1 slow - FU2 slow	0.0485523	-0.415206	0.512311	0.99998	Non-significant	FU1-FU2	slow-slow
M6PR	OID30208	P20645	Cardiometabolic_II	Timepoint:progression_status	B slow - FU1 slow	0.0148481	-0.127723	0.157419	0.999981	Non-significant	B-FU1	slow-slow
AGER	OID20756	Q15109	Inflammation	Timepoint:progression_status	FU1 slow - FU3 slow	-0.0596962	-0.635273	0.515881	0.999982	Non-significant	FU1-FU3	slow-slow
CRH	OID21257	P06850	Oncology	Timepoint:progression_status	FU2 fast - FU3 slow	-0.207682	-2.2016	1.78624	0.999982	Non-significant	FU2-FU3	fast-slow
GADD45GIP1	OID30237	Q8TAE8	Cardiometabolic_II	Timepoint:progression_status	FU1 slow - FU2 slow	-0.0352239	-0.377057	0.306609	0.999982	Non-significant	FU1-FU2	slow-slow
CRH	OID21257	P06850	Oncology	Timepoint:progression_status	B fast - FU3 fast	-0.293799	-3.15805	2.57045	0.999983	Non-significant	B-FU3	fast-fast
AKR7L	OID30488	Q8NHP1	Inflammation_II	Timepoint:progression_status	FU1 fast - FU2 fast	-0.0912572	-0.984256	0.801742	0.999983	Non-significant	FU1-FU2	fast-fast
CHCHD6	OID31426	Q9BRQ6	Oncology_II	Timepoint:progression_status	FU1 fast - FU3 slow	0.0861403	-0.755523	0.927803	0.999984	Non-significant	FU1-FU3	fast-slow
IL17D	OID20481	Q8TAD2	Inflammation	Timepoint:progression_status	FU1 fast - FU1 slow	-0.0778736	-0.857193	0.701446	0.999985	Non-significant	FU1-FU1	fast-slow
GNE	OID21231	Q9Y223	Oncology	Timepoint:progression_status	FU1 fast - FU2 slow	0.0665673	-0.590992	0.724127	0.999985	Non-significant	FU1-FU2	fast-slow
SPTBN2	OID30876	O15020	Neurology_II	Timepoint:progression_status	FU3 fast - FU3 slow	-0.13731	-1.49932	1.2247	0.999986	Non-significant	FU3-FU3	fast-slow
CRH	OID21257	P06850	Oncology	Timepoint:progression_status	B fast - FU2 fast	0.141499	-1.28385	1.56685	0.999986	Non-significant	B-FU2	fast-fast
IL17D	OID20481	Q8TAD2	Inflammation	Timepoint:progression_status	B fast - FU1 fast	-0.0532333	-0.591175	0.484709	0.999986	Non-significant	B-FU1	fast-fast
RAB33A	OID30122	Q14088	Cardiometabolic_II	Timepoint:progression_status	B slow - FU1 slow	0.0264148	-0.241368	0.294198	0.999988	Non-significant	B-FU1	slow-slow
SPTBN2	OID30876	O15020	Neurology_II	Timepoint:progression_status	FU1 fast - FU3 slow	-0.0724788	-0.812156	0.667199	0.999988	Non-significant	FU1-FU3	fast-slow
PNMA2	OID30842	Q9UL42	Neurology_II	Timepoint:progression_status	FU1 fast - FU2 slow	-0.0446177	-0.504377	0.415142	0.999989	Non-significant	FU1-FU2	fast-slow
GNE	OID21231	Q9Y223	Oncology	Timepoint:progression_status	FU1 fast - FU2 fast	0.0744256	-0.700459	0.84931	0.999989	Non-significant	FU1-FU2	fast-fast
M6PR	OID30208	P20645	Cardiometabolic_II	Timepoint:progression_status	B fast - FU3 fast	0.0414637	-0.38965	0.472577	0.999989	Non-significant	B-FU3	fast-fast
ARAF	OID31260	P10398	Oncology_II	Timepoint:progression_status	B fast - B slow	0.0869368	-0.831303	1.00518	0.999989	Non-significant	B-B	fast-slow
EIF4G3	OID31022	O43432	Neurology_II	Timepoint:progression_status	FU1 fast - FU2 slow	-0.050894	-0.58013	0.478342	0.99999	Non-significant	FU1-FU2	fast-slow
BPIFB1	OID20308	Q8TDL5	Cardiometabolic	Timepoint:progression_status	B fast - FU3 slow	0.115122	-1.10791	1.33816	0.99999	Non-significant	B-FU3	fast-slow
M6PR	OID30208	P20645	Cardiometabolic_II	Timepoint:progression_status	FU1 slow - FU3 slow	-0.0201594	-0.234105	0.193786	0.99999	Non-significant	FU1-FU3	slow-slow
[truncated: 122 more rows]

## Sheet: Significant progression
Assay	OlinkID	UniProt	Panel	term	contrast	estimate	conf.low	conf.high	Adjusted_pval	Threshold	significant_interaction
[truncated: 54 more rows]

[truncated: 1 more sheets: Significant time]
